# Supplementary material
Source: Preprints.org preprint supplement (doi:10.20944/preprints202108.0539.v1)
Supplement: Supplementary file 1 [file supplementary]

## Sheet: 1. Read me
This file contains data on the fuel properties of carbonized solid fuels (CSF) produced from peat waste. This ("read me") sheet is a guide on how to read the data. • The second spreadsheet ("2. CSF production") contains data about the CSF mass yield - MY, energy densification ratio - EDr, and energy yield - EY of process. • The third spreadsheet ("3. Proximate analysis") contains information abou…

## Sheet: 2. CSF production
The table present values of the mass yield - MY, energy densification ratio - EDr, energy yield - EY of peat waste torrefaction. Temperatures 200-300 °C with intervals 20 °C in residence time 20, 40 and 60 minutes wereused. Analysis has been done in three replications. Data of reference material (wood discussed in the study) torrefied at the same conditions can be found in supplementary material …
Temperature, °C	Time, min	MY, %	EDr, -	EY, %
200	20	97.5113	1.08059	105.37
200	20	97.5658	1.00656	98.206
200	20	97.5747	1.00517	98.0789
200	40	97.242	1.06594	103.654
200	40	97.2048	1.04396	101.478
200	40	97.5704	1.03646	101.128
200	60	96.9728	1.06284	103.066
200	60	96.8437	1.03559	100.291
200	60	97.5662	1.03223	100.71
220	20	98.512	1.04711	103.153
220	20	98.5087	1.02747	101.214
220	20	98.1281	1.02102	100.191
220	40	95.4556	1.05545	100.748
220	40	95.1152	1.04769	99.6513
220	40	95.4993	1.0955	104.619
220	60	91.024	1.04427	95.0538
220	60	90.4868	1.06883	96.7153
220	60	92.0697	1.07675	99.136
240	20	96.6529	1.0403	100.548
240	20	96.6734	1.02358	98.9525
240	20	96.7232	1.00406	97.1161
240	40	90.3722	1.08543	98.0925
240	40	90.0384	1.09003	98.1444
240	40	91.6571	1.03409	94.7821
240	60	88.4939	1.05258	93.147
240	60	87.8453	1.05984	93.1019
240	60	86.7	1.0934	94.7974
260	20	93.2983	1.04845	97.8189
260	20	92.9858	1.05361	97.9705
260	20	92.9759	1.04133	96.8183
260	40	81.5727	1.11954	91.3235
260	40	83.2692	1.08832	90.6235
260	40	85.291	1.07975	92.0927
260	60	83.0549	1.12821	93.7036
260	60	82.5599	1.13242	93.4925
260	60	84.4564	1.11888	94.4964
280	20	79.2211	1.06715	84.5408
280	20	81.041	1.08608	88.0174
280	20	83.0105	1.08056	89.698
280	40	79.1097	1.13989	90.1763
280	40	79.6356	1.11919	89.1276
280	40	80.8263	1.10544	89.3486
280	60	75.2385	1.11972	84.246
280	60	75.861	1.10184	83.5864
280	60	81.7443	1.11146	90.8557
300	20	78.6076	1.11704	87.8075
300	20	81.3998	1.12211	91.3397
300	20	85.3475	1.1	93.8819
300	40	72.2772	1.14318	82.6256
300	40	73.5365	1.09894	80.8125
300	40	74.2648	1.12098	83.2494
300	60	67.9077	1.0975	74.5286
300	60	68.8298	1.10284	75.908
300	60	70.6964	1.09313	77.2805

## Sheet: 3. Proximate analysis
The table presents results from proximate analysis, and high heating value determination of raw and torrefied peat waste at different torrefaction conditions. Proximate analysis has been done in three replications for each material. Volatile matter - VM, ash content - AC, fixed carbon - FC, volatile solids – VS, combustible part content – CP, and high heating value – HHV. Data of reference materi…
Temperature, °C	Time, min	VM, %	AC, %	FC, %	VS, %	CP, %	HHV, J·g-1
Raw	Raw	59.1876	14.0819	26.7305	83.3976	85.9181	18953.8
Raw	Raw	59.9048	15.329	24.7662	82.1038	84.671	19011
Raw	Raw	58.812	13.7486	27.4394	83.5281	86.2514	19075
200	20	56.2847	13.9095	29.8058	83.292	86.0905	20545.5
200	20	55.5649	14.4898	29.9452	82.7133	85.5102	19138
200	20	56.0976	13.8542	30.0482	83.377	86.1458	19111.5
200	40	56.3654	14.3389	29.2957	82.9098	85.6611	20267
200	40	54.9383	14.5807	30.481	82.5511	85.4193	19849
200	40	56.0338	13.8266	30.1396	83.3061	86.1734	19706.5
200	60	56.3601	14.3865	29.2534	82.9082	85.6135	20208
200	60	57.0366	14.8533	28.1102	82.4127	85.1467	19690
200	60	58.2192	14.4464	27.3344	82.8355	85.5536	19626
220	20	56.9285	13.9475	29.124	83.3604	86.0525	19909
220	20	56.6005	14.0913	29.3082	83.1871	85.9087	19535.5
220	20	56.9892	14.3261	28.6846	83.016	85.6739	19413
220	40	56.4531	13.9926	29.5543	83.2128	86.0074	20067.5
220	40	57.337	14.488	28.175	82.6799	85.512	19920
220	40	55.1282	14.5054	30.3664	82.6535	85.4946	20829
220	60	54.4341	15.1318	30.4342	82.0588	84.8682	19855
220	60	55.3253	15.1404	29.5343	82.0329	84.8596	20322
220	60	55.3312	15.4611	29.2077	81.7021	84.5389	20472.5
240	20	56.0284	14.4071	29.5645	82.8291	85.5929	19779.5
240	20	54.1156	14.2769	31.6075	82.8821	85.7231	19461.5
240	20	55.7971	14.0029	30.2	83.2738	85.9971	19090.5
240	40	53.3762	15.054	31.5698	81.8849	84.946	20637.5
240	40	54.0956	14.5821	31.3223	82.3444	85.4179	20725
240	40	54.4948	14.7685	30.7367	82.2333	85.2315	19661.5
240	60	52.6779	14.9506	32.3715	82.0194	85.0494	20013
240	60	52.2107	15.2414	32.5479	81.7615	84.7586	20151
240	60	54.1267	15.1588	30.7146	81.7956	84.8412	20789
260	20	53.8889	14.9081	31.203	82.2294	85.0919	19934.5
260	20	54.624	14.8159	30.5601	82.2546	85.1841	20032.5
260	20	54.4022	14.3388	31.259	82.7728	85.6612	19799
260	40	49.1003	16.8966	34.0031	79.897	83.1034	21286
260	40	49.3566	17.3635	33.2799	79.5759	82.6365	20692.5
260	40	49.3755	16.4577	34.1668	80.4705	83.5423	20529.5
260	60	49.8528	16.8972	33.25	79.8987	83.1028	21451
260	60	48.3636	17.1604	34.4759	79.6309	82.8396	21531
260	60	48.9464	16.9875	34.0661	79.8291	83.0125	21273.5
280	20	48.0357	17.081	34.8833	79.5773	82.919	20290
280	20	47.4738	16.6488	35.8774	80.1326	83.3512	20650
280	20	47.122	16.6714	36.2066	80.094	83.3286	20545
280	40	44.1708	17.858	37.9712	78.5249	82.142	21673
280	40	44.4543	17.53	38.0157	79.0375	82.47	21279.5
280	40	45.0581	17.8504	37.0914	78.7396	82.1496	21018
280	60	45.1863	17.71	37.1036	78.8234	82.29	21289.5
280	60	46.3927	17.5782	36.0291	79.0309	82.4218	20949.5
280	60	45.3532	17.3896	37.2572	79.2774	82.6104	21132.5
300	20	43.8183	17.2376	38.9441	79.5235	82.7624	21238.5
300	20	44.6889	17.6471	37.664	79	82.3529	21335
300	20	45.6976	17.0024	37.3	79.6334	82.9976	20914.5
300	40	40.3694	18.2434	41.3872	78.0375	81.7566	21735.5
300	40	40.4847	18.917	40.5982	77.3114	81.083	20894.5
300	40	39.964	18.4181	41.6179	77.848	81.5819	21313.5
300	60	39.3792	20.5123	40.1084	75.6163	79.4877	20867
300	60	37.1508	20.1006	42.7485	76.0302	79.8994	20968.5
300	60	37.767	20.1773	42.0557	75.7664	79.8227	20784

## Sheet: 4. TG-DTG-DSC
The tables contain data about thermogravimetric analysis. TG-DTG and DSC experiments were performed for peat waste and wood as reference. In the left table is data related to peat waste, while on the right side is data related to wood. For the experiment, a peat waste sample of 3.78 mg and a wood sample of 3.62 mg were used. The experiment was done without a repetition. The materials were heated …
Peat						Wood
Temperature,°C	Time, min	TG, %	DTG, % x min-1	DSC, mW x mg-1		Temperature,°C	Time, min	TG, %	DTG, % x min-1	DSC, mW x mg-1
30.074	0	100	0	-0.10385		30.045	0	100	0	0.13194
30.574	0.23346	100	-0.20601	-0.0868246		30.545	0.23346	99.9238	-0.47501	0.14352
31.074	0.39474	100	-0.22613	-0.074774		31.045	0.39474	99.8023	-0.44982	0.14874
31.574	0.51743	100	-0.22179	-0.0670571		31.545	0.51743	99.7398	-0.39506	0.14617
32.074	0.62436	99.9985	-0.19599	-0.0663897		32.045	0.62436	99.8097	-0.35596	0.13943
32.574	0.72182	99.9786	-0.15766	-0.0670558		32.545	0.72182	99.723	-0.33145	0.13213
33.074	0.81234	99.967	-0.11895	-0.0688514		33.045	0.81234	99.6571	-0.3113	0.12491
33.574	0.89708	99.9612	-0.0883895	-0.0733541		33.545	0.89708	99.6701	-0.29038	0.1176
34.074	0.97675	99.9577	-0.0680999	-0.0725574		34.045	0.97675	99.5754	-0.26846	0.10989
34.574	1.05217	99.9543	-0.0562445	-0.0763418		34.545	1.05217	99.6342	-0.24666	0.10181
35.074	1.12418	99.9504	-0.0500422	-0.0796153		35.045	1.12418	99.5684	-0.22567	0.0931348
35.574	1.19342	99.9468	-0.0476267	-0.0831745		35.545	1.19342	99.6787	-0.2063	0.0835181
36.074	1.26019	99.944	-0.0485522	-0.0891157		36.045	1.26019	99.6379	-0.18908	0.0782796
36.574	1.32482	99.9421	-0.0530277	-0.0918785		36.545	1.32482	99.5713	-0.17461	0.0684417
37.074	1.38747	99.9403	-0.0608441	-0.0932584		37.045	1.38747	99.6937	-0.16351	0.0625192
37.574	1.44846	99.9377	-0.0709869	-0.0975195		37.545	1.44846	99.6787	-0.15597	0.0552181
38.074	1.50793	99.9336	-0.0815902	-0.10049		38.045	1.50793	99.645	-0.15181	0.0488859
38.574	1.56614	99.9278	-0.0903979	-0.10676		38.545	1.56614	99.4638	-0.1502	0.0423257
39.074	1.62325	99.9206	-0.0953685	-0.10851		39.045	1.62325	99.4667	-0.15032	0.0341103
39.574	1.67925	99.913	-0.0951259	-0.11197		39.545	1.67925	99.6212	-0.15123	0.0287173
40.074	1.73417	99.9057	-0.0893892	-0.11462		40.045	1.73417	99.4922	-0.15219	0.0243215
40.574	1.78804	99.8995	-0.0787757	-0.1175		40.545	1.78804	99.4587	-0.15265	0.018516
41.074	1.84088	99.8948	-0.0646835	-0.1193		41.045	1.84088	99.642	-0.15245	0.0133617
41.574	1.89292	99.8917	-0.0484801	-0.12323		41.545	1.89292	99.4557	-0.15163	0.00860106
42.074	1.94429	99.8901	-0.0319664	-0.12649		42.045	1.94429	99.6581	-0.15037	0.00235006
42.574	1.99505	99.8897	-0.0166054	-0.1294		42.545	1.99505	99.5324	-0.1489	-0.00108321
43.074	2.04531	99.8903	-0.00344499	-0.13094		43.045	2.04531	99.5936	-0.14739	-0.00659783
43.574	2.09507	99.8915	0.00675916	-0.13415		43.545	2.09507	99.4347	-0.14597	-0.011867
44.074	2.1443	99.893	0.0135683	-0.13704		44.045	2.1443	99.5043	-0.14463	-0.0177231
44.574	2.19303	99.8948	0.0167924	-0.13827		44.545	2.19303	99.3828	-0.14345	-0.0213845
45.074	2.24127	99.8966	0.0164168	-0.1412		45.045	2.24127	99.4694	-0.1426	-0.0268208
45.574	2.28903	99.8983	0.0125556	-0.14397		45.545	2.28903	99.3436	-0.14224	-0.0323036
46.074	2.3363	99.8998	0.00544325	-0.14705		46.045	2.3363	99.4495	-0.14253	-0.0343775
46.574	2.38308	99.9009	-0.00460255	-0.14908		46.545	2.38308	99.4433	-0.14358	-0.0388001
47.074	2.42947	99.9014	-0.0170754	-0.15158		47.045	2.42947	99.4251	-0.14539	-0.041787
47.574	2.47541	99.9012	-0.0313339	-0.15483		47.545	2.47541	99.4181	-0.14784	-0.0475604
48.074	2.52102	99.8999	-0.0465293	-0.15649		48.045	2.52102	99.3958	-0.15077	-0.0510956
48.574	2.56635	99.8974	-0.0618554	-0.15998		48.545	2.56635	99.4503	-0.1539	-0.0559602
49.074	2.61143	99.8938	-0.0763078	-0.1629		49.045	2.61143	99.4048	-0.15703	-0.0591917
49.574	2.65624	99.8892	-0.0891902	-0.16443		49.545	2.65624	99.3939	-0.15999	-0.0633516
50.074	2.70079	99.8837	-0.0998734	-0.1664		50.045	2.70079	99.448	-0.1627	-0.0679022
50.574	2.74508	99.8778	-0.10809	-0.16955		50.545	2.74508	99.3351	-0.16516	-0.0722425
51.074	2.78915	99.8718	-0.11384	-0.17237		51.045	2.78915	99.2692	-0.16733	-0.0754341
51.574	2.83295	99.8658	-0.11748	-0.17334		51.545	2.83295	99.296	-0.1692	-0.0781571
52.074	2.87658	99.8602	-0.11957	-0.17628		52.045	2.87658	99.3952	-0.17078	-0.0817369
52.574	2.92005	99.8548	-0.12082	-0.18028		52.545	2.92005	99.36	-0.17204	-0.0847985
53.074	2.96333	99.8499	-0.12198	-0.18111		53.045	2.96333	99.3343	-0.17297	-0.0891171
53.574	3.00642	99.8452	-0.12376	-0.17963		53.545	3.00642	99.3216	-0.17346	-0.0921602
54.074	3.04935	99.8409	-0.12663	-0.1868		54.045	3.04935	99.318	-0.17336	-0.0946713
54.574	3.09211	99.8365	-0.1308	-0.18778		54.545	3.09211	99.462	-0.17257	-0.0992
55.074	3.13468	99.832	-0.13617	-0.18929		55.045	3.13468	99.2425	-0.17106	-0.10242
55.574	3.1771	99.827	-0.14221	-0.18969		55.545	3.1771	99.1478	-0.16873	-0.10497
56.074	3.2194	99.8213	-0.14812	-0.19277		56.045	3.2194	99.2273	-0.16575	-0.10812
56.574	3.2616	99.8146	-0.15296	-0.19592		56.545	3.2616	99.3771	-0.16239	-0.11186
57.074	3.30372	99.807	-0.15568	-0.19822		57.045	3.30372	99.3392	-0.15906	-0.11637
57.574	3.34579	99.7987	-0.15538	-0.19858		57.545	3.34579	99.2373	-0.15636	-0.11832
58.074	3.38782	99.7901	-0.15144	-0.20139		58.045	3.38782	99.2241	-0.15472	-0.12191
58.574	3.42978	99.7815	-0.1436	-0.20273		58.545	3.42978	99.336	-0.15448	-0.12454
59.074	3.47168	99.7737	-0.13226	-0.2052		59.045	3.47168	99.2388	-0.15574	-0.12832
59.574	3.51348	99.7669	-0.11817	-0.20724		59.545	3.51348	99.1227	-0.15835	-0.1315
60.074	3.55516	99.7615	-0.10263	-0.20768		60.045	3.55516	99.2233	-0.16205	-0.13445
60.574	3.59676	99.7578	-0.0872832	-0.20944		60.545	3.59676	99.2397	-0.16634	-0.13646
61.074	3.6383	99.7556	-0.0739199	-0.21157		61.045	3.6383	99.1904	-0.17078	-0.13906
61.574	3.67979	99.7549	-0.0643407	-0.21539		61.545	3.67979	99.2057	-0.17507	-0.14463
62.074	3.72129	99.7552	-0.0601835	-0.21693		62.045	3.72129	99.2232	-0.17892	-0.1463
62.574	3.76281	99.7562	-0.0625723	-0.21869		62.545	3.76281	99.1633	-0.18227	-0.14936
63.074	3.80433	99.7572	-0.0720799	-0.22196		63.045	3.80433	99.2538	-0.18521	-0.15249
63.574	3.84583	99.7577	-0.0886556	-0.22257		63.545	3.84583	99.2129	-0.18781	-0.15648
64.074	3.88734	99.7568	-0.11155	-0.22559		64.045	3.88734	99.1415	-0.19021	-0.15746
64.574	3.92883	99.7539	-0.13939	-0.22828		64.545	3.92883	99.2102	-0.19244	-0.16004
65.074	3.97033	99.7487	-0.17027	-0.22851		65.045	3.97033	99.2186	-0.19466	-0.16352
65.574	4.01186	99.7408	-0.20209	-0.23184		65.545	4.01186	99.2916	-0.19694	-0.16622
66.074	4.05342	99.7303	-0.23233	-0.23343		66.045	4.05342	99.2233	-0.19931	-0.16691
66.574	4.09503	99.7177	-0.25885	-0.23428		66.545	4.09503	99.096	-0.20187	-0.17144
67.074	4.13669	99.7033	-0.27982	-0.23714		67.045	4.13669	99.074	-0.20465	-0.17339
67.574	4.1784	99.6877	-0.29403	-0.23925		67.545	4.1784	99.067	-0.20774	-0.17571
68.074	4.22013	99.6719	-0.30082	-0.24102		68.045	4.22013	99.1626	-0.21129	-0.17863
68.574	4.2619	99.6561	-0.30032	-0.24377		68.545	4.2619	99.1887	-0.21548	-0.18003
69.074	4.30369	99.6411	-0.29312	-0.24513		69.045	4.30369	99.0485	-0.22041	-0.18281
69.574	4.34549	99.6272	-0.28028	-0.24658		69.545	4.34549	99.0057	-0.2262	-0.18489
70.074	4.38732	99.6148	-0.26348	-0.24866		70.045	4.38732	99.0587	-0.23293	-0.1866
70.574	4.42918	99.6041	-0.24436	-0.2491		70.545	4.42918	99.0666	-0.24039	-0.19118
71.074	4.47113	99.5951	-0.2249	-0.25186		71.045	4.47113	99.0969	-0.24825	-0.19173
71.574	4.51317	99.5876	-0.2067	-0.25313		71.545	4.51317	99.0614	-0.2559	-0.19407
72.074	4.55532	99.5813	-0.1912	-0.25595		72.045	4.55532	98.9739	-0.26265	-0.19585
72.574	4.59753	99.5757	-0.17942	-0.2601		72.545	4.59753	99.0004	-0.26785	-0.1979
73.074	4.63984	99.5705	-0.17212	-0.26134		73.045	4.63984	99.074	-0.27097	-0.19991
73.574	4.68217	99.5653	-0.16969	-0.26021		73.545	4.68217	98.9854	-0.27191	-0.2012
74.074	4.72454	99.5598	-0.17227	-0.26132		74.045	4.72454	98.8792	-0.27093	-0.20211
74.574	4.76696	99.5541	-0.17972	-0.26543		74.545	4.76696	98.9235	-0.26853	-0.20295
75.074	4.80943	99.5478	-0.19166	-0.26577		75.045	4.80943	99.0601	-0.26553	-0.20618
75.574	4.85196	99.541	-0.20746	-0.26772		75.545	4.85196	98.924	-0.26271	-0.20652
76.074	4.89457	99.5333	-0.22628	-0.26995		76.045	4.89457	98.9533	-0.26063	-0.2086
76.574	4.9372	99.5244	-0.24721	-0.27128		76.545	4.9372	99.0088	-0.25959	-0.20904
77.074	4.9799	99.5139	-0.26903	-0.27406		77.045	4.9799	98.9325	-0.25944	-0.2107
77.574	5.02266	99.5016	-0.29055	-0.27476		77.545	5.02266	98.8414	-0.25991	-0.21133
78.074	5.06545	99.4876	-0.3107	-0.27439		78.045	5.06545	98.9437	-0.26061	-0.21261
78.574	5.10829	99.472	-0.32865	-0.27586		78.545	5.10829	99.0776	-0.26116	-0.21341
79.074	5.15122	99.4555	-0.34386	-0.27982		79.045	5.15122	98.8427	-0.26142	-0.2134
79.574	5.19422	99.4387	-0.35641	-0.27972		79.545	5.19422	98.7383	-0.26129	-0.21345
80.074	5.23727	99.4222	-0.3666	-0.28076		80.045	5.23727	98.7699	-0.26077	-0.21281
80.574	5.28043	99.4062	-0.37508	-0.28135		80.545	5.28043	98.8605	-0.25992	-0.21463
81.074	5.32364	99.3906	-0.38259	-0.2838		81.045	5.32364	98.7885	-0.25872	-0.21484
81.574	5.36688	99.3752	-0.38969	-0.28386		81.545	5.36688	98.8251	-0.25699	-0.21495
82.074	5.41014	99.3595	-0.39659	-0.2863		82.045	5.41014	98.7467	-0.2546	-0.21247
82.574	5.45347	99.343	-0.40319	-0.28634		82.545	5.45347	98.7244	-0.25136	-0.21412
83.074	5.49686	99.3255	-0.40895	-0.28869		83.045	5.49686	98.9469	-0.24727	-0.21184
83.574	5.54034	99.3069	-0.41313	-0.28921		83.545	5.54034	98.793	-0.2425	-0.21378
84.074	5.58394	99.2874	-0.41489	-0.29102		84.045	5.58394	98.659	-0.2373	-0.21388
84.574	5.62762	99.2676	-0.41351	-0.29313		84.545	5.62762	98.6556	-0.23207	-0.21314
85.074	5.67138	99.2478	-0.40858	-0.29128		85.045	5.67138	98.776	-0.22719	-0.21322
85.574	5.71518	99.2285	-0.40003	-0.29398		85.545	5.71518	98.7006	-0.22299	-0.2123
86.074	5.75908	99.21	-0.38827	-0.29604		86.045	5.75908	98.7928	-0.21974	-0.21246
86.574	5.80307	99.1926	-0.3741	-0.29386		86.545	5.80307	98.6263	-0.21747	-0.21153
87.074	5.84719	99.1763	-0.35858	-0.29769		87.045	5.84719	98.6081	-0.21608	-0.20895
87.574	5.89142	99.1611	-0.34307	-0.29948		87.545	5.89142	98.8458	-0.21543	-0.20821
88.074	5.93577	99.1471	-0.32897	-0.29773		88.045	5.93577	98.6485	-0.21524	-0.20852
88.574	5.98019	99.1343	-0.31759	-0.30059		88.545	5.98019	98.68	-0.21532	-0.20753
89.074	6.02469	99.1224	-0.31	-0.29918		89.045	6.02469	98.5558	-0.21541	-0.20606
89.574	6.06922	99.1111	-0.307	-0.30163		89.545	6.06922	98.6242	-0.21533	-0.20187
90.074	6.11384	99.0999	-0.30894	-0.30215		90.045	6.11384	98.6338	-0.21497	-0.20132
90.574	6.15855	99.0882	-0.31578	-0.30335		90.545	6.15855	98.5585	-0.21421	-0.20024
91.074	6.20333	99.0756	-0.32692	-0.30386		91.045	6.20333	98.5959	-0.21308	-0.19822
91.574	6.2482	99.0618	-0.34154	-0.30519		91.545	6.2482	98.7159	-0.21135	-0.19598
92.074	6.29318	99.0464	-0.35852	-0.30326		92.045	6.29318	98.7475	-0.20889	-0.1947
92.574	6.33824	99.0297	-0.37653	-0.30333		92.545	6.33824	98.6416	-0.20556	-0.19209
93.074	6.38337	99.0116	-0.3945	-0.30206		93.045	6.38337	98.5194	-0.2012	-0.18915
93.574	6.42861	98.9924	-0.41169	-0.30328		93.545	6.42861	98.6358	-0.19586	-0.18723
94.074	6.47395	98.9725	-0.42716	-0.30408		94.045	6.47395	98.5046	-0.18983	-0.18551
94.574	6.51937	98.9521	-0.44043	-0.30276		94.545	6.51937	98.4966	-0.18367	-0.18235
95.074	6.56493	98.9312	-0.45118	-0.30342		95.045	6.56493	98.5438	-0.17816	-0.1825
95.574	6.61062	98.9098	-0.45911	-0.30458		95.545	6.61062	98.6233	-0.17404	-0.17882
96.074	6.6564	98.8881	-0.46382	-0.30504		96.045	6.6564	98.5092	-0.17193	-0.17463
96.574	6.70227	98.866	-0.465	-0.30185		96.545	6.70227	98.519	-0.17201	-0.17327
97.074	6.74825	98.8434	-0.46221	-0.30143		97.045	6.74825	98.6501	-0.17397	-0.17076
97.574	6.7943	98.8206	-0.45509	-0.30234		97.545	6.7943	98.454	-0.17709	-0.16856
98.074	6.84045	98.7981	-0.44351	-0.30317		98.045	6.84045	98.3624	-0.18046	-0.16491
98.574	6.88674	98.7761	-0.42764	-0.30312		98.545	6.88674	98.4744	-0.18317	-0.16256
99.074	6.93315	98.7551	-0.40812	-0.30104		99.045	6.93315	98.4707	-0.18457	-0.15962
99.574	6.97965	98.7356	-0.38596	-0.29978		99.545	6.97965	98.4603	-0.18445	-0.1562
100.074	7.02624	98.7178	-0.36253	-0.30122		100.045	7.02624	98.4797	-0.18296	-0.15337
100.574	7.07292	98.7019	-0.33965	-0.29781		100.545	7.07292	98.4935	-0.1804	-0.14955
101.074	7.11969	98.6878	-0.31928	-0.29885		101.045	7.11969	98.2791	-0.17702	-0.14718
101.574	7.16654	98.6752	-0.30321	-0.29715		101.545	7.16654	98.4904	-0.17281	-0.1446
102.074	7.21355	98.6638	-0.29322	-0.29656		102.045	7.21355	98.5702	-0.16774	-0.14039
102.574	7.26072	98.653	-0.29045	-0.29441		102.545	7.26072	98.1735	-0.16169	-0.13794
103.074	7.30806	98.6423	-0.29543	-0.29349		103.045	7.30806	98.5863	-0.15455	-0.13456
103.574	7.35555	98.6309	-0.30789	-0.29245		103.545	7.35555	98.4696	-0.14667	-0.13185
104.074	7.40322	98.6184	-0.32679	-0.29275		104.045	7.40322	98.2825	-0.13855	-0.13009
104.574	7.45098	98.604	-0.35024	-0.29052		104.545	7.45098	98.4182	-0.13106	-0.12717
105.074	7.49885	98.5874	-0.37586	-0.28767		105.045	7.49885	98.4151	-0.12493	-0.12155
105.574	7.54682	98.5682	-0.40097	-0.28918		105.545	7.54682	98.3627	-0.12072	-0.11932
106.074	7.59488	98.5466	-0.42265	-0.28627		106.045	7.59488	98.384	-0.11858	-0.11616
106.574	7.643	98.5228	-0.4387	-0.28418		106.545	7.643	98.4334	-0.11825	-0.11246
107.074	7.69119	98.4975	-0.44746	-0.28366		107.045	7.69119	98.2295	-0.11915	-0.10964
107.574	7.73942	98.472	-0.4484	-0.28266		107.545	7.73942	98.4899	-0.12057	-0.1065
108.074	7.78774	98.4473	-0.44226	-0.28116		108.045	7.78774	98.3135	-0.12183	-0.10265
108.574	7.83618	98.4244	-0.4308	-0.27902		108.545	7.83618	98.3169	-0.12225	-0.0985301
109.074	7.88475	98.4037	-0.41636	-0.27721		109.045	7.88475	98.3307	-0.12143	-0.0962544
109.574	7.93348	98.3853	-0.40153	-0.27457		109.545	7.93348	98.3502	-0.11912	-0.0931602
110.074	7.98237	98.3684	-0.38845	-0.27282		110.045	7.98237	98.3798	-0.11529	-0.0892223
110.574	8.03136	98.3523	-0.37844	-0.26992		110.545	8.03136	98.4501	-0.11016	-0.0870401
111.074	8.08042	98.3359	-0.37176	-0.27019		111.045	8.08042	98.3077	-0.10408	-0.0826632
111.574	8.12954	98.3187	-0.36775	-0.26873		111.545	8.12954	98.2304	-0.0976252	-0.0798901
112.074	8.1787	98.3004	-0.36512	-0.26871		112.045	8.1787	98.4942	-0.0913416	-0.0775797
112.574	8.22795	98.2812	-0.36239	-0.26574		112.545	8.22795	98.2254	-0.0856543	-0.0741942
113.074	8.27729	98.2618	-0.35842	-0.26225		113.045	8.27729	98.3777	-0.0809822	-0.0710897
113.574	8.32679	98.2428	-0.35269	-0.25998		113.545	8.32679	98.2594	-0.0775201	-0.0688101
114.074	8.3764	98.2246	-0.34536	-0.25911		114.045	8.3764	98.2969	-0.0753331	-0.0650287
114.574	8.42609	98.2076	-0.33728	-0.25769		114.545	8.42609	98.3041	-0.0744203	-0.0624547
115.074	8.47586	98.1917	-0.32963	-0.25542		115.045	8.47586	98.2659	-0.0745273	-0.0611696
115.574	8.52564	98.1766	-0.32371	-0.25248		115.545	8.52564	98.2351	-0.0753546	-0.0572441
116.074	8.57546	98.1621	-0.32069	-0.2507		116.045	8.57546	98.3504	-0.0765184	-0.0554031
116.574	8.62528	98.1478	-0.32127	-0.24832		116.545	8.62528	98.3044	-0.0775825	-0.0530852
117.074	8.67516	98.1331	-0.32556	-0.24825		117.045	8.67516	98.1505	-0.0782676	-0.0486659
117.574	8.7251	98.1179	-0.33306	-0.24558		117.545	8.7251	98.4338	-0.0784361	-0.0459461
118.074	8.77509	98.1016	-0.34271	-0.24094		118.045	8.77509	98.2035	-0.0779974	-0.0450963
118.574	8.82519	98.0842	-0.35322	-0.23937		118.545	8.82519	98.3417	-0.0772175	-0.0407807
119.074	8.87535	98.0657	-0.36311	-0.23672		119.045	8.87535	98.3356	-0.0764207	-0.0393784
119.574	8.92557	98.0461	-0.3711	-0.23267		119.545	8.92557	98.2128	-0.0759123	-0.036172
120.074	8.97587	98.0257	-0.37629	-0.23198		120.045	8.97587	98.3817	-0.0759331	-0.0341539
120.574	9.02617	98.005	-0.37833	-0.22974		120.545	9.02617	98.1655	-0.0766357	-0.0328059
121.074	9.07649	97.9846	-0.37754	-0.22765		121.045	9.07649	98.2613	-0.0780158	-0.0307875
121.574	9.12681	97.965	-0.37476	-0.22582		121.545	9.12681	98.2344	-0.0798955	-0.0270833
122.074	9.1771	97.9464	-0.37113	-0.22619		122.045	9.1771	98.1211	-0.0820043	-0.0256101
122.574	9.22744	97.9287	-0.36785	-0.22002		122.545	9.22744	98.3428	-0.083865	-0.0216214
123.074	9.27782	97.9115	-0.36573	-0.21872		123.045	9.27782	98.153	-0.0850101	-0.0200259
123.574	9.32824	97.8943	-0.36511	-0.21474		123.545	9.32824	98.3617	-0.0850392	-0.0179259
124.074	9.37873	97.8766	-0.36572	-0.21386		124.045	9.37873	98.0742	-0.0836377	-0.0175012
124.574	9.42925	97.858	-0.36678	-0.21009		124.545	9.42925	98.3389	-0.0807359	-0.0130437
125.074	9.47978	97.8387	-0.36725	-0.20762		125.045	9.47978	98.2214	-0.0765763	-0.0126551
125.574	9.5303	97.8189	-0.36614	-0.20445		125.545	9.5303	98.1598	-0.0715536	-0.00789709
126.074	9.58083	97.799	-0.3628	-0.20224		126.045	9.58083	98.2965	-0.0662309	-0.00554227
126.574	9.63135	97.7796	-0.35709	-0.20002		126.545	9.63135	98.1701	-0.0611904	-0.00485201
127.074	9.6819	97.7609	-0.34943	-0.19913		127.045	9.6819	98.4439	-0.0569151	-0.0010704
127.574	9.73251	97.7432	-0.34064	-0.19693		127.545	9.73251	98.0921	-0.0538432	0.00176231
128.074	9.78313	97.7265	-0.33175	-0.19429		128.045	9.78313	98.1594	-0.0520545	0.00180519
128.574	9.83378	97.7107	-0.32375	-0.1902		128.545	9.83378	98.1876	-0.0514124	0.0036403
129.074	9.88436	97.6955	-0.31739	-0.18806		129.045	9.88436	98.1454	-0.0515072	0.00653307
129.574	9.93491	97.6806	-0.31294	-0.18616		129.545	9.93491	98.2227	-0.0518373	0.00836662
130.074	9.98543	97.6656	-0.31018	-0.18182		130.045	9.98543	98.0989	-0.0519939	0.0114678
130.574	10.0359	97.6503	-0.3085	-0.18046		130.545	10.0359	98.236	-0.0517208	0.0121024
131.074	10.0864	97.6346	-0.30703	-0.17678		131.045	10.0864	98.2348	-0.0511595	0.0133764
131.574	10.1369	97.6184	-0.30488	-0.17458		131.545	10.1369	98.2065	-0.0506882	0.0151666
132.074	10.1874	97.6021	-0.30136	-0.172		132.045	10.1874	98.1761	-0.0506237	0.0184612
132.574	10.2379	97.5858	-0.29618	-0.16935		132.545	10.2379	98.0522	-0.0510331	0.0204565
133.074	10.2884	97.57	-0.28956	-0.16779		133.045	10.2884	98.2619	-0.0516268	0.0217224
133.574	10.339	97.5551	-0.28221	-0.165		133.545	10.339	98.0877	-0.0517854	0.0257933
134.074	10.3895	97.5412	-0.27524	-0.16269		134.045	10.3895	98.2826	-0.0510947	0.0272349
134.574	10.4401	97.5282	-0.26995	-0.15962		134.545	10.4401	98.1931	-0.049475	0.0282014
135.074	10.4907	97.516	-0.26749	-0.15468		135.045	10.4907	98.1162	-0.0472208	0.0303593
135.574	10.5412	97.5041	-0.26879	-0.15399		135.545	10.5412	98.214	-0.0450549	0.032008
136.074	10.5918	97.4921	-0.27427	-0.15204		136.045	10.5918	98.1272	-0.0437299	0.0334983
136.574	10.6425	97.4796	-0.28383	-0.1476		136.545	10.6425	98.2446	-0.0438312	0.0356603
137.074	10.6932	97.4663	-0.2967	-0.14534		137.045	10.6932	98.1074	-0.0454789	0.037803
137.574	10.7438	97.4517	-0.31158	-0.14233		137.545	10.7438	98.2023	-0.0483258	0.0397188
138.074	10.7944	97.4358	-0.32658	-0.13837		138.045	10.7944	98.2207	-0.0518583	0.0424926
138.574	10.845	97.418	-0.33957	-0.13548		138.545	10.845	98.1453	-0.0554059	0.0460783
139.074	10.8956	97.3987	-0.34859	-0.13177		139.045	10.8956	98.1735	-0.0585323	0.0465042
139.574	10.9462	97.3782	-0.35218	-0.12828		139.545	10.9462	98.0823	-0.0607947	0.0491748
140.074	10.9968	97.3573	-0.34978	-0.12862		140.045	10.9968	98.0371	-0.0620378	0.0518552
140.574	11.0474	97.3372	-0.34192	-0.12517		140.545	11.0474	98.1264	-0.0622987	0.0511519
141.074	11.0979	97.3186	-0.3301	-0.12126		141.045	11.0979	98.1572	-0.0617834	0.0539021
141.574	11.1484	97.3022	-0.31667	-0.11768		141.545	11.1484	98.0852	-0.0608022	0.0544185
142.074	11.1989	97.2881	-0.30405	-0.11316		142.045	11.1989	98.1033	-0.0596127	0.0573934
142.574	11.2494	97.2755	-0.29436	-0.11067		142.545	11.2494	98.2756	-0.0582853	0.0606446
143.074	11.2998	97.2636	-0.28879	-0.10923		143.045	11.2998	98.1322	-0.056592	0.061403
143.574	11.3502	97.2515	-0.28736	-0.10526		143.545	11.3502	98.0652	-0.0540409	0.0635118
144.074	11.4006	97.2383	-0.28899	-0.10245		144.045	11.4006	98.1842	-0.0501933	0.0654133
144.574	11.4509	97.2236	-0.29177	-0.1013		144.545	11.4509	98.1255	-0.0450536	0.0667971
145.074	11.5012	97.2076	-0.29348	-0.098219		145.045	11.5012	98.1609	-0.0391842	0.0689292
145.574	11.5516	97.1907	-0.29211	-0.0955856		145.545	11.5516	98.0746	-0.0336953	0.07058
146.074	11.6019	97.1737	-0.28622	-0.0909945		146.045	11.6019	98.1369	-0.029755	0.0743575
146.574	11.6522	97.1573	-0.27514	-0.0853183		146.545	11.6522	98.0725	-0.0283997	0.0755453
147.074	11.7025	97.1422	-0.25921	-0.0846137		147.045	11.7025	98.1759	-0.0299011	0.0763747
147.574	11.7529	97.1286	-0.23967	-0.0827927		147.545	11.7529	97.9557	-0.0337865	0.0790789
148.074	11.8031	97.1167	-0.21827	-0.0801413		148.045	11.8031	98.1566	-0.0389728	0.0805194
148.574	11.8534	97.1064	-0.19734	-0.0737432		148.545	11.8534	98.1935	-0.0442561	0.0826135
149.074	11.9035	97.098	-0.17945	-0.071608		149.045	11.9035	98.0185	-0.0485259	0.0876513
149.574	11.9536	97.0912	-0.1669	-0.0691362		149.545	11.9536	98.0977	-0.0513759	0.0877184
150.074	12.0037	97.0859	-0.16189	-0.0643461		150.045	12.0037	98.0262	-0.0528151	0.090854
150.574	12.0539	97.0816	-0.1658	-0.0608382		150.545	12.0539	98.0447	-0.0533291	0.0916218
151.074	12.1041	97.0772	-0.17916	-0.0592967		151.045	12.1041	98.0338	-0.053564	0.0942685
151.574	12.1544	97.0713	-0.20125	-0.0561581		151.545	12.1544	98.0832	-0.0542483	0.0968492
152.074	12.2046	97.063	-0.22987	-0.0534022		152.045	12.2046	98.0171	-0.0558085	0.0985478
152.574	12.2548	97.0515	-0.26216	-0.0506696		152.545	12.2548	98.0872	-0.058407	0.10072
153.074	12.3049	97.0366	-0.2945	-0.04704		153.045	12.3049	98.1093	-0.0619735	0.10144
153.574	12.3548	97.0185	-0.32386	-0.0446293		153.545	12.3548	98.0336	-0.0661428	0.10511
154.074	12.4047	96.9984	-0.34727	-0.0403665		154.045	12.4047	98.0369	-0.0705369	0.10708
154.574	12.4545	96.9769	-0.36325	-0.0358758		154.545	12.4545	98.0715	-0.0747161	0.10814
155.074	12.5044	96.9552	-0.37129	-0.0367107		155.045	12.5044	98.0594	-0.078316	0.11105
155.574	12.5543	96.9341	-0.37213	-0.0313679		155.545	12.5543	98.0598	-0.0812968	0.11266
156.074	12.6042	96.9143	-0.36738	-0.0308611		156.045	12.6042	97.9274	-0.0837549	0.11546
156.574	12.6542	96.8959	-0.35907	-0.0237407		156.545	12.6542	98.1404	-0.0858139	0.1167
157.074	12.7041	96.8788	-0.34916	-0.020712		157.045	12.7041	98.0202	-0.0877076	0.12089
157.574	12.7541	96.8628	-0.33924	-0.0180943		157.545	12.7541	98.1991	-0.0893748	0.1208
158.074	12.8041	96.8473	-0.33016	-0.0155034		158.045	12.8041	98.0055	-0.0907493	0.12471
158.574	12.8541	96.8318	-0.32216	-0.0118839		158.545	12.8541	98.0898	-0.0915806	0.12605
159.074	12.9042	96.816	-0.31501	-0.00866566		159.045	12.9042	98.0505	-0.0917719	0.12982
159.574	12.9543	96.8001	-0.30817	-0.00807784		159.545	12.9543	97.9789	-0.0913537	0.131
160.074	13.0043	96.7841	-0.30123	-0.00166553		160.045	13.0043	97.9272	-0.0907108	0.13369
160.574	13.0544	96.7684	-0.29399	-0.00167646		160.545	13.0544	97.9742	-0.0904793	0.13585
161.074	13.1043	96.7534	-0.28668	0.00391866		161.045	13.1043	98.0546	-0.0912413	0.13772
161.574	13.1541	96.7394	-0.27986	0.0103663		161.545	13.1541	97.9869	-0.0932384	0.14035
162.074	13.2039	96.7263	-0.27421	0.0116886		162.045	13.2039	98.0607	-0.0963688	0.14219
162.574	13.2537	96.7138	-0.27025	0.0149264		162.545	13.2537	97.9458	-0.0999554	0.14237
163.074	13.3034	96.7017	-0.26823	0.018204		163.045	13.3034	98.0535	-0.10329	0.14567
163.574	13.3533	96.6892	-0.26793	0.0195712		163.545	13.3533	97.9645	-0.10562	0.1474
164.074	13.4033	96.6761	-0.26883	0.0260104		164.045	13.4033	98.0432	-0.1066	0.15001
164.574	13.4534	96.6622	-0.27024	0.0261282		164.545	13.4534	97.9673	-0.1063	0.1535
165.074	13.5035	96.6478	-0.27157	0.0311488		165.045	13.5035	98.1451	-0.10509	0.15423
165.574	13.5537	96.6333	-0.27249	0.0344064		165.545	13.5537	97.9746	-0.10347	0.15681
166.074	13.6038	96.6191	-0.27309	0.0382779		166.045	13.6038	98.0957	-0.10204	0.15961
166.574	13.6539	96.6056	-0.27375	0.0406075		166.545	13.6539	97.7726	-0.10118	0.16128
167.074	13.7039	96.5925	-0.27501	0.0467019		167.045	13.7039	98.1304	-0.1013	0.1634
167.574	13.7538	96.5796	-0.27732	0.046193		167.545	13.7538	97.9201	-0.10253	0.16637
168.074	13.8039	96.5666	-0.28085	0.0518973		168.045	13.8039	97.9283	-0.10486	0.16968
168.574	13.8539	96.553	-0.28534	0.0561352		168.545	13.8539	97.9268	-0.10822	0.17015
169.074	13.904	96.5386	-0.29017	0.0574125		169.045	13.904	97.8797	-0.11221	0.17337
169.574	13.9541	96.5235	-0.2945	0.0631599		169.545	13.9541	97.8952	-0.11658	0.17747
170.074	14.0041	96.5078	-0.2974	0.0661792		170.045	14.0041	97.7373	-0.12103	0.17846
170.574	14.0542	96.4918	-0.29809	0.0701715		170.545	14.0542	97.9084	-0.1254	0.18123
171.074	14.1042	96.4758	-0.29603	0.0731533		171.045	14.1042	97.8638	-0.12971	0.18278
171.574	14.1541	96.46	-0.29104	0.0750896		171.545	14.1541	97.9589	-0.13384	0.18634
172.074	14.2041	96.4448	-0.2833	0.0808957		172.045	14.2041	97.7403	-0.1377	0.18793
172.574	14.2542	96.4301	-0.27328	0.084099		172.545	14.2542	97.8863	-0.14093	0.19047
173.074	14.3043	96.4162	-0.26196	0.0874434		173.045	14.3043	97.8782	-0.1432	0.19239
173.574	14.3545	96.4031	-0.25045	0.0931096		173.545	14.3545	97.9792	-0.1445	0.19442
174.074	14.4046	96.3912	-0.24012	0.0964921		174.045	14.4046	97.8529	-0.14498	0.19894
174.574	14.4547	96.3804	-0.23241	0.0994078		174.545	14.4547	97.8123	-0.14506	0.19909
175.074	14.5047	96.3705	-0.22852	0.10438		175.045	14.5047	97.8616	-0.14529	0.20319
175.574	14.5546	96.3613	-0.22932	0.10595		175.545	14.5546	97.731	-0.14595	0.20467
176.074	14.6046	96.3519	-0.23511	0.10706		176.045	14.6046	97.7769	-0.14711	0.20781
176.574	14.6546	96.3419	-0.24541	0.11217		176.545	14.6546	97.9441	-0.14866	0.20926
177.074	14.7047	96.3306	-0.25905	0.11572		177.045	14.7047	97.8119	-0.15026	0.21193
177.574	14.7547	96.3175	-0.27445	0.1207		177.545	14.7547	97.9402	-0.15187	0.21428
178.074	14.8048	96.3026	-0.28976	0.12649		178.045	14.8048	97.7417	-0.15345	0.21658
178.574	14.8547	96.2862	-0.30327	0.127		178.545	14.8547	97.8957	-0.15522	0.21939
179.074	14.9047	96.2687	-0.31381	0.12909		179.045	14.9047	97.6582	-0.15738	0.22129
179.574	14.9547	96.251	-0.32072	0.13465		179.545	14.9547	97.8224	-0.1599	0.2253
180.074	15.0046	96.2335	-0.32412	0.13859		180.045	15.0046	97.7392	-0.16271	0.22686
180.574	15.0545	96.2167	-0.32459	0.14095		180.545	15.0545	97.7034	-0.16562	0.23042
181.074	15.1044	96.2005	-0.32296	0.14763		181.045	15.1044	97.8591	-0.16856	0.23421
181.574	15.1543	96.1848	-0.31993	0.15026		181.545	15.1543	97.6594	-0.1716	0.23513
182.074	15.2042	96.1693	-0.31599	0.15136		182.045	15.2042	97.7074	-0.17502	0.23809
182.574	15.2541	96.1537	-0.31127	0.15313		182.545	15.2541	97.8032	-0.17921	0.23893
183.074	15.304	96.138	-0.30563	0.16128		183.045	15.304	97.5898	-0.18446	0.24094
183.574	15.354	96.122	-0.29886	0.16368		183.545	15.354	97.7436	-0.19092	0.24373
184.074	15.4039	96.1063	-0.29093	0.16619		184.045	15.4039	97.747	-0.19865	0.24549
184.574	15.4538	96.0912	-0.2821	0.17041		184.545	15.4538	97.5899	-0.2073	0.24801
185.074	15.5037	96.077	-0.27315	0.17423		185.045	15.5037	97.777	-0.21641	0.25288
185.574	15.5535	96.0638	-0.26525	0.18103		185.545	15.5535	97.6552	-0.22533	0.25301
186.074	15.6034	96.0517	-0.25981	0.1816		186.045	15.6034	97.5402	-0.23322	0.25589
186.574	15.6533	96.0403	-0.2583	0.18692		186.545	15.6533	97.7835	-0.23947	0.2607
187.074	15.7031	96.0294	-0.26198	0.19126		187.045	15.7031	97.5778	-0.24372	0.26266
187.574	15.753	96.0186	-0.27152	0.1936		187.545	15.753	97.7421	-0.24598	0.2657
188.074	15.8028	96.0072	-0.28687	0.19515		188.045	15.8028	97.6315	-0.24689	0.26762
188.574	15.8527	95.9946	-0.30682	0.20102		188.545	15.8527	97.48	-0.2472	0.27101
189.074	15.9025	95.98	-0.3294	0.2045		189.045	15.9025	97.6521	-0.24782	0.27216
189.574	15.9523	95.9629	-0.35182	0.20838		189.545	15.9523	97.5306	-0.24935	0.274
190.074	16.002	95.9432	-0.37089	0.21189		190.045	16.002	97.6637	-0.25202	0.27735
190.574	16.0518	95.921	-0.38361	0.21385		190.545	16.0518	97.4165	-0.25564	0.2805
191.074	16.1016	95.8974	-0.3876	0.21981		191.045	16.1016	97.6296	-0.25982	0.28413
191.574	16.1515	95.8735	-0.38183	0.22402		191.545	16.1515	97.3807	-0.2643	0.28405
192.074	16.2014	95.8507	-0.36676	0.22737		192.045	16.2014	97.5796	-0.269	0.28598
192.574	16.2513	95.8302	-0.34434	0.23075		192.545	16.2513	97.3997	-0.27408	0.29042
193.074	16.3013	95.8128	-0.31736	0.23322		193.045	16.3013	97.4966	-0.27957	0.29227
193.574	16.3512	95.7987	-0.28923	0.23866		193.545	16.3512	97.4596	-0.28539	0.2938
194.074	16.401	95.7874	-0.26319	0.24158		194.045	16.401	97.4471	-0.291	0.298
194.574	16.4508	95.778	-0.2418	0.24721		194.545	16.4508	97.4439	-0.29567	0.3013
195.074	16.5007	95.7695	-0.22658	0.25122		195.045	16.5007	97.4007	-0.29866	0.3033
195.574	16.5506	95.7609	-0.21793	0.25451		195.545	16.5506	97.4361	-0.29958	0.30529
196.074	16.6006	95.7516	-0.2153	0.26008		196.045	16.6006	97.394	-0.29871	0.30666
196.574	16.6505	95.7414	-0.21766	0.26091		196.545	16.6505	97.4768	-0.29682	0.30977
197.074	16.7005	95.7305	-0.22384	0.26728		197.045	16.7005	97.3889	-0.29516	0.31338
197.574	16.7504	95.7192	-0.23276	0.27154		197.545	16.7504	97.3908	-0.29495	0.31403
198.074	16.8004	95.7077	-0.24371	0.27291		198.045	16.8004	97.2097	-0.29728	0.31926
198.574	16.8504	95.6957	-0.25617	0.27831		198.545	16.8504	97.4496	-0.30286	0.32225
199.074	16.9005	95.6831	-0.26979	0.28435		199.045	16.9005	97.1421	-0.31179	0.32497
199.574	16.9506	95.6696	-0.28447	0.28512		199.545	16.9506	97.3704	-0.32361	0.3285
200.074	17.0008	95.6551	-0.30003	0.29072		200.045	17.0008	97.2133	-0.33737	0.33066
200.574	17.0508	95.6398	-0.31633	0.29482		200.545	17.0508	97.3987	-0.35171	0.33346
201.074	17.1008	95.6236	-0.33331	0.30273		201.045	17.1008	97.1414	-0.36514	0.33831
201.574	17.1507	95.6068	-0.35067	0.30205		201.545	17.1507	97.2015	-0.37636	0.34054
202.074	17.2007	95.5892	-0.36805	0.30731		202.045	17.2007	97.1975	-0.38473	0.34407
202.574	17.2507	95.5704	-0.38483	0.3104		202.545	17.2507	97.204	-0.39038	0.34729
203.074	17.3007	95.5505	-0.40017	0.31716		203.045	17.3007	97.1153	-0.39417	0.35134
203.574	17.3508	95.5293	-0.41313	0.31989		203.545	17.3508	97.0452	-0.39726	0.35402
204.074	17.401	95.5071	-0.42265	0.32083		204.045	17.401	97.2187	-0.40087	0.35797
204.574	17.4511	95.4843	-0.42775	0.32469		204.545	17.4511	97.099	-0.40566	0.3612
205.074	17.5013	95.4612	-0.42758	0.3314		205.045	17.5013	97.1646	-0.41181	0.36315
205.574	17.5514	95.4382	-0.42155	0.33666		205.545	17.5514	96.9252	-0.41908	0.36863
206.074	17.6015	95.4154	-0.40945	0.34033		206.045	17.6015	97.1986	-0.4273	0.37077
206.574	17.6515	95.3934	-0.39178	0.34187		206.545	17.6515	96.9627	-0.43649	0.37581
207.074	17.7015	95.3723	-0.36942	0.34564		207.045	17.7015	96.9305	-0.44686	0.37829
207.574	17.7515	95.353	-0.344	0.35261		207.545	17.7515	96.8473	-0.45877	0.38172
208.074	17.8015	95.3361	-0.31783	0.35606		208.045	17.8015	96.8918	-0.47227	0.38644
208.574	17.8515	95.3218	-0.2935	0.36016		208.545	17.8515	96.9372	-0.48696	0.38884
209.074	17.9015	95.31	-0.2737	0.36353		209.045	17.9015	96.7827	-0.50214	0.39282
209.574	17.9516	95.3001	-0.26069	0.36996		209.545	17.9516	96.9627	-0.51675	0.39654
210.074	18.0016	95.2909	-0.25579	0.37376		210.045	18.0016	96.8766	-0.52979	0.40094
210.574	18.0517	95.2813	-0.25939	0.37764		210.545	18.0517	97.0898	-0.54079	0.40447
211.074	18.1019	95.2705	-0.27107	0.38093		211.045	18.1019	96.6726	-0.54946	0.40897
211.574	18.152	95.2581	-0.28946	0.38347		211.545	18.152	96.8932	-0.55624	0.41294
212.074	18.2021	95.244	-0.31285	0.39073		212.045	18.2021	96.7141	-0.56202	0.41511
212.574	18.2522	95.2281	-0.33893	0.39663		212.545	18.2522	96.8268	-0.56794	0.41999
213.074	18.3022	95.2104	-0.36548	0.39862		213.045	18.3022	96.6695	-0.57523	0.42286
213.574	18.3522	95.1909	-0.39039	0.40579		213.545	18.3522	96.649	-0.58483	0.4279
214.074	18.4021	95.1695	-0.41147	0.40559		214.045	18.4021	96.6731	-0.59695	0.43018
214.574	18.4521	95.1462	-0.42718	0.4088		214.545	18.4521	96.6805	-0.6114	0.4359
215.074	18.5021	95.1216	-0.43639	0.41643		215.045	18.5021	96.5015	-0.62721	0.43686
215.574	18.5521	95.0966	-0.43885	0.42141		215.545	18.5521	96.484	-0.64325	0.4417
216.074	18.6021	95.0723	-0.43524	0.42122		216.045	18.6021	96.4946	-0.6583	0.44535
216.574	18.6521	95.0491	-0.427	0.42628		216.545	18.6521	96.4338	-0.67165	0.44763
217.074	18.7021	95.0279	-0.41623	0.42941		217.045	18.7021	96.4454	-0.68318	0.45285
217.574	18.7522	95.0083	-0.40507	0.43373		217.545	18.7522	96.3469	-0.69305	0.45578
218.074	18.8023	94.9899	-0.39558	0.43943		218.045	18.8023	96.3852	-0.7018	0.46031
218.574	18.8523	94.9722	-0.38935	0.4436		218.545	18.8523	96.2975	-0.70974	0.46376
219.074	18.9022	94.9546	-0.38723	0.44778		219.045	18.9022	96.3779	-0.7171	0.46877
219.574	18.9522	94.9366	-0.38948	0.45196		219.545	18.9522	96.2665	-0.72383	0.47164
220.074	19.0021	94.9182	-0.39569	0.45602		220.045	19.0021	96.1273	-0.7299	0.47367
220.574	19.0522	94.899	-0.40504	0.46151		220.545	19.0522	96.2688	-0.73543	0.47894
221.074	19.1024	94.8788	-0.41627	0.46407		221.045	19.1024	96.0186	-0.7409	0.48267
221.574	19.1525	94.8576	-0.42799	0.46585		221.545	19.1525	96.1823	-0.7471	0.48423
222.074	19.2026	94.8354	-0.4387	0.47254		222.045	19.2026	95.9767	-0.75486	0.48966
222.574	19.2526	94.8122	-0.44708	0.47467		222.545	19.2526	96.1858	-0.7647	0.49283
223.074	19.3026	94.7882	-0.45216	0.48222		223.045	19.3026	95.9603	-0.77672	0.49709
223.574	19.3526	94.7638	-0.45338	0.48585		223.545	19.3526	95.9553	-0.79065	0.50026
224.074	19.4026	94.7395	-0.45077	0.49215		224.045	19.4026	95.8695	-0.80577	0.50515
224.574	19.4526	94.7158	-0.44497	0.49627		224.545	19.4526	95.8667	-0.8214	0.50666
225.074	19.5026	94.6929	-0.43719	0.50082		225.045	19.5026	95.807	-0.83699	0.51233
225.574	19.5526	94.6715	-0.42909	0.50319		225.545	19.5526	95.8536	-0.85226	0.51604
226.074	19.6026	94.6512	-0.42244	0.50752		226.045	19.6026	95.7333	-0.86724	0.51976
226.574	19.6526	94.6318	-0.41903	0.51269		226.545	19.6526	95.7943	-0.88173	0.52225
227.074	19.7026	94.6128	-0.42034	0.51555		227.045	19.7026	95.6479	-0.89552	0.52577
227.574	19.7525	94.5938	-0.42741	0.52108		227.545	19.7525	95.7381	-0.90815	0.52993
228.074	19.8025	94.5743	-0.44076	0.52879		228.045	19.8025	95.6323	-0.9189	0.53428
228.574	19.8524	94.5539	-0.4603	0.52898		228.545	19.8524	95.6573	-0.92729	0.5367
229.074	19.9025	94.5321	-0.48538	0.53309		229.045	19.9025	95.3869	-0.93322	0.54093
229.574	19.9524	94.5087	-0.51485	0.53905		229.545	19.9524	95.4916	-0.93728	0.54351
230.074	20.0024	94.4832	-0.54701	0.54303		230.045	20.0024	95.4079	-0.94053	0.54764
230.574	20.0524	94.4553	-0.57979	0.54553		230.545	20.0524	95.3661	-0.94425	0.55184
231.074	20.1023	94.4247	-0.61062	0.55065		231.045	20.1023	95.2539	-0.94956	0.55729
231.574	20.1522	94.3917	-0.63675	0.55622		231.545	20.1522	95.1613	-0.95728	0.55918
232.074	20.2021	94.3565	-0.65595	0.56021		232.045	20.2021	95.2167	-0.96769	0.56269
232.574	20.252	94.3196	-0.66643	0.56143		232.545	20.252	95.1553	-0.9806	0.56663
233.074	20.3019	94.2822	-0.6673	0.56644		233.045	20.3019	95.1529	-0.99573	0.57001
233.574	20.3518	94.2452	-0.65898	0.57219		233.545	20.3518	94.9134	-1.01224	0.57153
234.074	20.4017	94.2096	-0.64307	0.57571		234.045	20.4017	95.0253	-1.02939	0.57541
234.574	20.4516	94.1765	-0.62223	0.58273		234.545	20.4516	94.826	-1.04636	0.57863
235.074	20.5016	94.1461	-0.59976	0.58674		235.045	20.5016	94.86	-1.0623	0.58296
235.574	20.5516	94.1184	-0.5791	0.59014		235.545	20.5516	94.6759	-1.07688	0.58711
236.074	20.6015	94.0929	-0.56349	0.59832		236.045	20.6015	94.928	-1.08998	0.5916
236.574	20.6514	94.0685	-0.55526	0.59972		236.545	20.6514	94.7368	-1.10165	0.59358
237.074	20.7012	94.0442	-0.55552	0.60581		237.045	20.7012	94.8008	-1.11208	0.59946
237.574	20.751	94.0192	-0.56422	0.61024		237.545	20.751	94.5236	-1.1215	0.60225
238.074	20.801	93.993	-0.58023	0.61696		238.045	20.801	94.6005	-1.13002	0.60379
238.574	20.8509	93.9649	-0.60159	0.62326		238.545	20.8509	94.4941	-1.13804	0.60892
239.074	20.9009	93.9347	-0.62571	0.62491		239.045	20.9009	94.6719	-1.14631	0.61269
239.574	20.9509	93.9023	-0.64969	0.63292		239.545	20.9509	94.3428	-1.15589	0.61728
240.074	21.001	93.8675	-0.67086	0.63652		240.045	21.001	94.479	-1.168	0.6196
240.574	21.0511	93.831	-0.68701	0.64174		240.545	21.0511	94.1601	-1.18367	0.62378
241.074	21.1011	93.7932	-0.69702	0.64709		241.045	21.1011	94.2692	-1.20319	0.62574
241.574	21.1512	93.7554	-0.7006	0.65589		241.545	21.1512	94.0627	-1.22606	0.63082
242.074	21.2011	93.7183	-0.69878	0.65942		242.045	21.2011	94.1527	-1.25097	0.63477
242.574	21.251	93.6823	-0.69349	0.66636		242.545	21.251	93.9977	-1.27624	0.63945
243.074	21.301	93.6481	-0.68751	0.67174		243.045	21.301	94.0722	-1.30041	0.64243
243.574	21.351	93.6153	-0.68378	0.67682		243.545	21.351	93.7784	-1.32247	0.6476
244.074	21.401	93.5838	-0.68515	0.68364		244.045	21.401	93.8066	-1.34182	0.64989
244.574	21.4509	93.5528	-0.69376	0.69027		244.545	21.4509	93.7712	-1.35834	0.65577
245.074	21.5008	93.5216	-0.71081	0.69546		245.045	21.5008	93.7547	-1.37225	0.6586
245.574	21.5507	93.4892	-0.73605	0.69865		245.545	21.5507	93.7251	-1.38397	0.66431
246.074	21.6006	93.4545	-0.76811	0.70675		246.045	21.6006	93.4474	-1.39418	0.66937
246.574	21.6505	93.4165	-0.80449	0.71133		246.545	21.6505	93.594	-1.40375	0.67135
247.074	21.7005	93.3751	-0.84178	0.71772		247.045	21.7005	93.362	-1.41353	0.6766
247.574	21.7504	93.3302	-0.87671	0.7245		247.545	21.7504	93.4373	-1.42466	0.68015
248.074	21.8002	93.2824	-0.90648	0.72796		248.045	21.8002	93.1455	-1.43777	0.6854
248.574	21.8501	93.2332	-0.92905	0.7326		248.545	21.8501	93.2249	-1.45339	0.68974
249.074	21.9	93.1831	-0.94399	0.73601		249.045	21.9	93.1526	-1.47155	0.69361
249.574	21.9499	93.1329	-0.9519	0.73925		249.545	21.9499	92.948	-1.49196	0.69548
250.074	21.9998	93.0837	-0.9544	0.74893		250.045	21.9998	93.1574	-1.51443	0.70106
250.574	22.0499	93.0357	-0.95389	0.75332		250.545	22.0499	92.8642	-1.53822	0.70678
251.074	22.0999	92.9889	-0.95295	0.75925		251.045	22.0999	92.9483	-1.56283	0.71119
251.574	22.15	92.943	-0.95377	0.76463		251.545	22.15	92.6165	-1.58786	0.71607
252.074	22.2001	92.8975	-0.95781	0.76769		252.045	22.2001	92.7933	-1.61266	0.72062
252.574	22.2502	92.8514	-0.96561	0.77272		252.545	22.2502	92.5521	-1.63692	0.726
253.074	22.3003	92.804	-0.97674	0.77885		253.045	22.3003	92.56	-1.66038	0.72956
253.574	22.3504	92.7552	-0.9899	0.78498		253.545	22.3504	92.4275	-1.68303	0.73554
254.074	22.4005	92.7048	-1.00351	0.79109		254.045	22.4005	92.2104	-1.70524	0.74007
254.574	22.4504	92.6529	-1.01599	0.79335		254.545	22.4504	92.3393	-1.7274	0.7444
255.074	22.5004	92.6003	-1.02618	0.80056		255.045	22.5004	92.166	-1.75002	0.74897
255.574	22.5504	92.5471	-1.03365	0.80502		255.545	22.5504	92.186	-1.77348	0.75515
256.074	22.6004	92.494	-1.03861	0.81043		256.045	22.6004	92.0104	-1.7978	0.75857
256.574	22.6505	92.4415	-1.04196	0.81369		256.545	22.6505	92.025	-1.82288	0.76496
257.074	22.7005	92.3895	-1.04501	0.82079		257.045	22.7005	91.8109	-1.84864	0.77183
257.574	22.7506	92.3379	-1.04913	0.82873		257.545	22.7506	91.6385	-1.87487	0.77431
258.074	22.8007	92.2866	-1.05544	0.83156		258.045	22.8007	91.6228	-1.90164	0.77985
258.574	22.8508	92.2352	-1.06458	0.83868		258.545	22.8508	91.5517	-1.929	0.78352
259.074	22.901	92.1831	-1.07662	0.84539		259.045	22.901	91.4916	-1.95691	0.79016
259.574	22.9513	92.1298	-1.09108	0.84727		259.545	22.9513	91.1284	-1.98491	0.79401
260.074	23.0015	92.0752	-1.10694	0.85389		260.045	23.0015	91.332	-2.01279	0.80042
260.574	23.0517	92.0189	-1.12323	0.85755		260.545	23.0517	91.0852	-2.04012	0.80406
261.074	23.1019	91.9614	-1.13869	0.86158		261.045	23.1019	91.043	-2.06675	0.81066
261.574	23.1521	91.9031	-1.15246	0.86863		261.545	23.1521	90.9786	-2.0929	0.81454
262.074	23.2023	91.844	-1.16407	0.87088		262.045	23.2023	90.8361	-2.11873	0.82253
262.574	23.2524	91.7846	-1.17339	0.87485		262.545	23.2524	90.8431	-2.14464	0.82735
263.074	23.3025	91.7249	-1.18071	0.8814		263.045	23.3025	90.4335	-2.17125	0.83285
263.574	23.3526	91.6654	-1.18651	0.88727		263.545	23.3526	90.5919	-2.19881	0.83963
264.074	23.4027	91.6059	-1.19159	0.89257		264.045	23.4027	90.4271	-2.22744	0.84568
264.574	23.4528	91.5463	-1.19676	0.89532		264.545	23.4528	90.3244	-2.25747	0.84898
265.074	23.503	91.4866	-1.20289	0.90447		265.045	23.503	90.2565	-2.28892	0.85417
265.574	23.5531	91.4265	-1.21088	0.90692		265.545	23.5531	89.9789	-2.32165	0.86006
266.074	23.6032	91.3662	-1.22158	0.912		266.045	23.6032	89.9417	-2.35558	0.8666
266.574	23.6534	91.3054	-1.23584	0.91858		266.545	23.6534	89.9525	-2.39029	0.87013
267.074	23.7036	91.2444	-1.25427	0.92561		267.045	23.7036	89.6442	-2.42486	0.87672
267.574	23.7538	91.1827	-1.27717	0.92742		267.545	23.7538	89.6329	-2.45881	0.88222
268.074	23.804	91.1197	-1.30459	0.93206		268.045	23.804	89.3611	-2.49145	0.88803
268.574	23.8541	91.0551	-1.33567	0.94002		268.545	23.8541	89.3319	-2.52224	0.89237
269.074	23.9043	90.9886	-1.36892	0.94355		269.045	23.9043	89.2314	-2.5516	0.89693
269.574	23.9545	90.9189	-1.40289	0.95067		269.545	23.9545	89.1541	-2.57984	0.90417
270.074	24.0047	90.8469	-1.43511	0.95761		270.045	24.0047	89.0284	-2.60773	0.90925
270.574	24.055	90.7726	-1.46358	0.95915		270.545	24.055	88.7419	-2.63591	0.91486
271.074	24.1052	90.6962	-1.48669	0.96192		271.045	24.1052	88.6954	-2.66505	0.92014
271.574	24.1554	90.6188	-1.50304	0.96883		271.545	24.1554	88.671	-2.69563	0.92558
272.074	24.2056	90.541	-1.51215	0.9778		272.045	24.2056	88.2704	-2.72775	0.93077
272.574	24.2558	90.4629	-1.5142	0.9838		272.545	24.2558	88.4129	-2.76117	0.93696
273.074	24.306	90.3854	-1.51006	0.9876		273.045	24.306	88.009	-2.79585	0.94333
273.574	24.3562	90.3084	-1.50127	0.99141		273.545	24.3562	87.912	-2.83135	0.94933
274.074	24.4065	90.2327	-1.4899	0.9988		274.045	24.4065	87.8983	-2.86721	0.9538
274.574	24.4569	90.1586	-1.47845	1.00151		274.545	24.4569	87.6106	-2.9033	0.95834
275.074	24.5071	90.0861	-1.46949	1.00669		275.045	24.5071	87.5747	-2.93921	0.96316
275.574	24.5573	90.0151	-1.46544	1.01366		275.545	24.5573	87.4202	-2.97464	0.96993
276.074	24.6075	89.945	-1.46817	1.01575		276.045	24.6075	87.2071	-3.00947	0.9735
276.574	24.6576	89.8746	-1.47876	1.02331		276.545	24.6576	87.1784	-3.04377	0.98048
277.074	24.7078	89.8033	-1.4973	1.02687		277.045	24.7078	87.0496	-3.07764	0.9832
277.574	24.7581	89.7301	-1.52288	1.02904		277.545	24.7581	86.7309	-3.11112	0.99088
278.074	24.8084	89.6547	-1.55367	1.03577		278.045	24.8084	86.7725	-3.14441	0.99708
278.574	24.8588	89.5768	-1.58737	1.03933		278.545	24.8588	86.4363	-3.17774	0.99834
279.074	24.9092	89.4963	-1.62128	1.04624		279.045	24.9092	86.4071	-3.21101	1.00315
279.574	24.9595	89.4129	-1.65274	1.04699		279.545	24.9595	86.2147	-3.24468	1.0096
280.074	25.0098	89.3272	-1.67924	1.0556		280.045	25.0098	86.0889	-3.2793	1.01347
280.574	25.0599	89.2394	-1.69894	1.06188		280.545	25.0599	85.7613	-3.3155	1.01973
281.074	25.11	89.1502	-1.7109	1.06194		281.045	25.11	85.6851	-3.3532	1.02449
281.574	25.1601	89.061	-1.71519	1.06787		281.545	25.1601	85.622	-3.3927	1.03066
282.074	25.2102	88.9729	-1.71299	1.07574		282.045	25.2102	85.2023	-3.43362	1.03413
282.574	25.2603	88.886	-1.70623	1.08192		282.545	25.2603	85.2922	-3.47563	1.03838
283.074	25.3104	88.8008	-1.69729	1.08456		283.045	25.3104	84.8477	-3.51824	1.04315
283.574	25.3605	88.717	-1.68857	1.08836		283.545	25.3605	84.9111	-3.5608	1.04919
284.074	25.4105	88.6344	-1.6822	1.09015		284.045	25.4105	84.7179	-3.60316	1.05421
284.574	25.4605	88.5516	-1.67962	1.09823		284.545	25.4605	84.3049	-3.64459	1.05924
285.074	25.5104	88.469	-1.68173	1.10183		285.045	25.5104	84.4311	-3.68538	1.06212
285.574	25.5602	88.386	-1.68884	1.10992		285.545	25.5602	83.9373	-3.72527	1.06636
286.074	25.6101	88.3018	-1.70104	1.11266		286.045	25.6101	83.9457	-3.76414	1.07021
286.574	25.6598	88.2168	-1.71814	1.11523		286.545	25.6598	83.7484	-3.80238	1.07362
287.074	25.7095	88.131	-1.73974	1.12125		287.045	25.7095	83.4366	-3.84012	1.08045
287.574	25.7593	88.0443	-1.76517	1.12546		287.545	25.7593	83.491	-3.87759	1.08502
288.074	25.8092	87.9564	-1.7934	1.12946		288.045	25.8092	83.0412	-3.91474	1.08835
288.574	25.8592	87.8667	-1.82297	1.1323		288.545	25.8592	83.0816	-3.95174	1.09237
289.074	25.9092	87.7747	-1.85213	1.14104		289.045	25.9092	82.6979	-3.98842	1.09541
289.574	25.9591	87.6801	-1.87868	1.14514		289.545	25.9591	82.6215	-4.02466	1.10063
290.074	26.009	87.5829	-1.90072	1.14805		290.045	26.009	82.2953	-4.06084	1.1036
290.574	26.0588	87.4839	-1.91662	1.15384		290.545	26.0588	82.1317	-4.0972	1.10591
291.074	26.1086	87.3839	-1.92578	1.15953		291.045	26.1086	82.0083	-4.13442	1.11049
291.574	26.1585	87.2843	-1.92855	1.1641		291.545	26.1585	81.6487	-4.17316	1.11533
292.074	26.2084	87.1859	-1.92625	1.17049		292.045	26.2084	81.6017	-4.2136	1.11936
292.574	26.2584	87.0893	-1.9207	1.17556		292.545	26.2584	81.2351	-4.25587	1.12202
293.074	26.3085	86.9943	-1.91384	1.18264		293.045	26.3085	81.0567	-4.30008	1.12418
293.574	26.3585	86.9005	-1.90712	1.18443		293.545	26.3585	80.914	-4.34572	1.12702
294.074	26.4086	86.8069	-1.90127	1.19		294.045	26.4086	80.7207	-4.39249	1.13083
294.574	26.4586	86.7124	-1.89634	1.19495		294.545	26.4586	80.4003	-4.43999	1.13712
295.074	26.5086	86.6172	-1.89193	1.20144		295.045	26.5086	80.2331	-4.48762	1.13932
295.574	26.5585	86.5213	-1.88762	1.20501		295.545	26.5585	80.0249	-4.535	1.14311
296.074	26.6083	86.4253	-1.88343	1.20771		296.045	26.6083	79.712	-4.58189	1.14761
296.574	26.658	86.3304	-1.88004	1.21147		296.545	26.658	79.6367	-4.6283	1.15017
297.074	26.7077	86.2372	-1.87869	1.21641		297.045	26.7077	79.3818	-4.67466	1.15304
297.574	26.7574	86.1453	-1.88084	1.22254		297.545	26.7574	78.9864	-4.72141	1.15592
298.074	26.8072	86.0545	-1.88764	1.2283		298.045	26.8072	78.9209	-4.76909	1.15973
298.574	26.857	85.9632	-1.89952	1.23201		298.545	26.857	78.6147	-4.81752	1.16198
299.074	26.9068	85.8702	-1.9159	1.23147		299.045	26.9068	78.4409	-4.86714	1.16393
299.574	26.9567	85.7751	-1.93508	1.23524		299.545	26.9567	78.063	-4.91768	1.16491
300.074	27.0065	85.6767	-1.95489	1.24226		300.045	27.0065	77.9971	-4.96882	1.16842
300.574	27.0564	85.5761	-1.97294	1.24394		300.545	27.0564	77.6131	-5.02059	1.17131
301.074	27.1063	85.4745	-1.98743	1.25217		301.045	27.1063	77.3963	-5.07319	1.17295
301.574	27.1563	85.3722	-1.99765	1.25188		301.545	27.1563	77.0002	-5.12631	1.17488
302.074	27.2062	85.2703	-2.00372	1.25715		302.045	27.2062	76.9704	-5.18016	1.17715
302.574	27.2561	85.1694	-2.00665	1.26326		302.545	27.2561	76.5015	-5.2348	1.18101
303.074	27.306	85.0691	-2.00787	1.26592		303.045	27.306	76.3795	-5.28998	1.18296
303.574	27.356	84.9692	-2.00884	1.26672		303.545	27.356	75.9376	-5.34589	1.1862
304.074	27.4059	84.8697	-2.01073	1.27149		304.045	27.4059	75.8248	-5.40266	1.1869
304.574	27.4559	84.7698	-2.01417	1.27627		304.545	27.4559	75.4189	-5.46033	1.18911
305.074	27.5059	84.6693	-2.01929	1.2784		305.045	27.5059	75.1857	-5.51904	1.19043
305.574	27.5559	84.5683	-2.02571	1.28418		305.545	27.5559	74.8855	-5.57841	1.19146
306.074	27.606	84.4667	-2.03267	1.2874		306.045	27.606	74.708	-5.63858	1.19403
306.574	27.6559	84.3648	-2.03913	1.29102		306.545	27.6559	74.4651	-5.69863	1.19604
307.074	27.7059	84.2621	-2.04399	1.29122		307.045	27.7059	74.2204	-5.75924	1.19733
307.574	27.7558	84.1588	-2.04622	1.29626		307.545	27.7558	73.8283	-5.82058	1.19806
308.074	27.8056	84.0547	-2.04504	1.29854		308.045	27.8056	73.4945	-5.8829	1.20157
308.574	27.8555	83.9503	-2.04006	1.30154		308.545	27.8555	73.1713	-5.94672	1.2016
309.074	27.9054	83.8466	-2.03154	1.30449		309.045	27.9054	73.0396	-6.01207	1.20369
309.574	27.9554	83.7438	-2.02026	1.30887		309.545	27.9554	72.682	-6.07894	1.20466
310.074	28.0055	83.6423	-2.00755	1.31372		310.045	28.0055	72.4007	-6.14739	1.20566
310.574	28.0557	83.5424	-1.9951	1.3176		310.545	28.0557	72.0122	-6.21714	1.20802
311.074	28.106	83.4438	-1.98459	1.32016		311.045	28.106	71.7536	-6.2883	1.20933
311.574	28.1563	83.346	-1.97752	1.32549		311.545	28.1563	71.42	-6.36041	1.21192
312.074	28.2065	83.2493	-1.97505	1.32897		312.045	28.2065	71.1888	-6.43319	1.21234
312.574	28.2565	83.1526	-1.9777	1.33199		312.545	28.2565	70.7448	-6.50667	1.2143
313.074	28.3066	83.055	-1.98548	1.33471		313.045	28.3066	70.5508	-6.57986	1.21628
313.574	28.3567	82.9568	-1.99776	1.33768		313.545	28.3567	70.1247	-6.65307	1.21629
314.074	28.4068	82.857	-2.01362	1.34117		314.045	28.4068	69.8472	-6.72647	1.21642
314.574	28.457	82.7558	-2.0317	1.34612		314.545	28.457	69.4253	-6.79917	1.21842
315.074	28.5073	82.6534	-2.05046	1.35141		315.045	28.5073	69.2054	-6.87119	1.22008
315.574	28.5575	82.5497	-2.06841	1.35483		315.545	28.5575	68.761	-6.94218	1.22078
316.074	28.6077	82.4449	-2.08423	1.35717		316.045	28.6077	68.4828	-7.01187	1.22307
316.574	28.6578	82.3392	-2.09687	1.36581		316.545	28.6578	68.0007	-7.08024	1.22222
317.074	28.708	82.2327	-2.10559	1.3666		317.045	28.708	67.712	-7.14734	1.2254
317.574	28.7582	82.1255	-2.11001	1.36958		317.545	28.7582	67.3317	-7.21371	1.22395
318.074	28.8085	82.0187	-2.11012	1.3747		318.045	28.8085	66.9876	-7.27851	1.22592
318.574	28.8587	81.9126	-2.10631	1.37875		318.545	28.8587	66.6657	-7.3421	1.22759
319.074	28.909	81.807	-2.09924	1.38546		319.045	28.909	66.2308	-7.4045	1.22606
319.574	28.9592	81.7016	-2.08976	1.387		319.545	28.9592	65.8619	-7.46489	1.22829
320.074	29.0094	81.597	-2.07897	1.39156		320.045	29.0094	65.4742	-7.52335	1.2284
320.574	29.0596	81.4931	-2.06809	1.39512		320.545	29.0596	65.2256	-7.57966	1.23044
321.074	29.1097	81.3902	-2.05844	1.39928		321.045	29.1097	64.5449	-7.63335	1.23322
321.574	29.1599	81.2886	-2.05133	1.40189		321.545	29.1599	64.4495	-7.68396	1.23321
322.074	29.2101	81.1879	-2.04789	1.40664		322.045	29.2101	63.7879	-7.73114	1.23615
322.574	29.2603	81.0876	-2.04905	1.4112		322.545	29.2603	63.576	-7.77432	1.23865
323.074	29.3104	80.9876	-2.05538	1.41417		323.045	29.3104	63.1408	-7.81316	1.23919
323.574	29.3605	80.8869	-2.06703	1.41678		323.545	29.3605	62.8231	-7.84744	1.24096
324.074	29.4107	80.7853	-2.08351	1.42044		324.045	29.4107	62.3708	-7.87719	1.2437
324.574	29.4608	80.6822	-2.10386	1.42374		324.545	29.4608	61.8914	-7.9024	1.24372
325.074	29.511	80.5772	-2.12656	1.42564		325.045	29.511	61.5874	-7.92329	1.24487
325.574	29.5612	80.4705	-2.14959	1.43045		325.545	29.5612	61.0571	-7.93984	1.24472
326.074	29.6114	80.362	-2.17077	1.43192		326.045	29.6114	60.6711	-7.95227	1.24719
326.574	29.6616	80.2518	-2.18791	1.43527		326.545	29.6616	60.249	-7.96086	1.24937
327.074	29.7117	80.1403	-2.19893	1.44065		327.045	29.7117	59.8425	-7.9659	1.25062
327.574	29.7619	80.0272	-2.20223	1.43995		327.545	29.7619	59.6336	-7.96783	1.25177
328.074	29.812	79.9136	-2.19678	1.44811		328.045	29.812	59.0104	-7.9671	1.25165
328.574	29.862	79.8004	-2.1825	1.44937		328.545	29.862	58.6152	-7.96388	1.25327
329.074	29.912	79.6888	-2.16027	1.45414		329.045	29.912	58.2746	-7.95823	1.25209
329.574	29.962	79.5797	-2.13192	1.45747		329.545	29.962	57.7396	-7.95004	1.25398
330.074	30.0119	79.4732	-2.09985	1.46069		330.045	30.0119	57.5907	-7.93918	1.2509
330.574	30.0619	79.3699	-2.06693	1.46233		330.545	30.0619	56.9354	-7.92565	1.25448
331.074	30.1119	79.2691	-2.03583	1.46969		331.045	30.1119	56.8157	-7.90978	1.25343
331.574	30.1619	79.1701	-2.00902	1.46756		331.545	30.1619	56.1634	-7.89204	1.25351
332.074	30.2119	79.0727	-1.98839	1.47238		332.045	30.2119	55.8162	-7.87304	1.25271
332.574	30.2619	78.9765	-1.97506	1.47789		332.545	30.2619	55.4739	-7.85341	1.254
333.074	30.3119	78.8804	-1.96908	1.47981		333.045	30.3119	55.0145	-7.83383	1.25271
333.574	30.3619	78.7843	-1.9698	1.48523		333.545	30.3619	54.7469	-7.81491	1.25277
334.074	30.4119	78.6873	-1.97582	1.4878		334.045	30.4119	54.3779	-7.79713	1.25185
334.574	30.4619	78.5889	-1.98534	1.4907		334.545	30.4619	53.9397	-7.78101	1.25382
335.074	30.5118	78.489	-1.9965	1.4963		335.045	30.5118	53.7496	-7.76689	1.25326
335.574	30.5617	78.3875	-2.00769	1.49753		335.545	30.5617	53.0506	-7.75483	1.25244
336.074	30.6116	78.2853	-2.01779	1.49894		336.045	30.6116	52.774	-7.74472	1.2521
336.574	30.6615	78.1825	-2.02638	1.50361		336.545	30.6615	52.455	-7.73616	1.25
337.074	30.7114	78.0803	-2.03361	1.50148		337.045	30.7114	51.8167	-7.72854	1.25009
337.574	30.7614	77.9783	-2.04017	1.50455		337.545	30.7614	51.6815	-7.72121	1.25147
338.074	30.8114	77.8764	-2.04686	1.51125		338.045	30.8114	51.2117	-7.71347	1.25089
338.574	30.8615	77.7749	-2.0543	1.5136		338.545	30.8615	50.8568	-7.70487	1.25007
339.074	30.9117	77.6724	-2.06286	1.51772		339.045	30.9117	50.4195	-7.69506	1.2507
339.574	30.9619	77.5694	-2.07227	1.5217		339.545	30.9619	50.1347	-7.68382	1.25025
340.074	31.0122	77.4656	-2.08181	1.52508		340.045	31.0122	49.8222	-7.6708	1.2501
340.574	31.0625	77.3604	-2.09051	1.52724		340.545	31.0625	49.2225	-7.65555	1.25412
341.074	31.1127	77.2548	-2.09712	1.53503		341.045	31.1127	49.0468	-7.63748	1.25416
341.574	31.1629	77.1482	-2.10072	1.53628		341.545	31.1629	48.4406	-7.61572	1.25562
342.074	31.2131	77.0413	-2.10072	1.54087		342.045	31.2131	48.2234	-7.58943	1.25696
342.574	31.2633	76.9347	-2.09713	1.54385		342.545	31.2633	47.7078	-7.55781	1.25737
343.074	31.3134	76.8288	-2.09059	1.54707		343.045	31.3134	47.3826	-7.52001	1.25941
343.574	31.3637	76.7241	-2.08226	1.54996		343.545	31.3637	46.9901	-7.47555	1.26013
344.074	31.414	76.6204	-2.07357	1.55288		344.045	31.414	46.5095	-7.42326	1.25987
344.574	31.4643	76.5179	-2.06598	1.55781		344.545	31.4643	46.3474	-7.36213	1.26025
345.074	31.5145	76.4162	-2.06062	1.56224		345.045	31.5145	45.6772	-7.2913	1.26098
345.574	31.5648	76.3146	-2.05805	1.56423		345.545	31.5648	45.53	-7.2095	1.26435
346.074	31.6151	76.2128	-2.05815	1.56386		346.045	31.6151	44.998	-7.11643	1.26574
346.574	31.6655	76.1101	-2.06021	1.57226		346.545	31.6655	44.7249	-7.01275	1.26713
347.074	31.7159	76.0067	-2.06311	1.57318		347.045	31.7159	44.281	-6.89872	1.26916
347.574	31.7663	75.9025	-2.06548	1.57233		347.545	31.7663	43.9652	-6.77586	1.26857
348.074	31.8168	75.7982	-2.06606	1.58281		348.045	31.8168	43.6069	-6.64496	1.27033
348.574	31.8671	75.6933	-2.0638	1.58638		348.545	31.8671	43.3211	-6.50752	1.27473
349.074	31.9175	75.5885	-2.05809	1.59221		349.045	31.9175	42.8875	-6.36418	1.27681
349.574	31.9678	75.4839	-2.04877	1.59092		349.545	31.9678	42.6629	-6.21579	1.27919
350.074	32.0182	75.38	-2.03626	1.59554		350.045	32.0182	42.0453	-6.06272	1.28089
350.574	32.0686	75.2773	-2.02149	1.59881		350.545	32.0686	42.104	-5.90515	1.283
351.074	32.119	75.1765	-2.00578	1.60248		351.045	32.119	41.5685	-5.74299	1.2844
351.574	32.1695	75.0767	-1.99051	1.60892		351.545	32.1695	41.3558	-5.57646	1.28544
352.074	32.22	74.9787	-1.97723	1.60976		352.045	32.22	40.9794	-5.40412	1.2898
352.574	32.2705	74.8816	-1.9671	1.61412		352.545	32.2705	40.9032	-5.22679	1.29426
353.074	32.321	74.7853	-1.96089	1.61621		353.045	32.321	40.5219	-5.04509	1.29275
353.574	32.3713	74.689	-1.95872	1.6196		353.545	32.3713	40.3396	-4.85972	1.29468
354.074	32.4217	74.5924	-1.96011	1.62854		354.045	32.4217	40.1548	-4.674	1.2993
354.574	32.472	74.4948	-1.96407	1.62806		354.545	32.472	39.8872	-4.48886	1.29999
355.074	32.5223	74.3963	-1.96924	1.63883		355.045	32.5223	39.6132	-4.30541	1.30062
355.574	32.5726	74.2968	-1.97417	1.63586		355.545	32.5726	39.5904	-4.12561	1.3009
356.074	32.623	74.1966	-1.97753	1.63998		356.045	32.623	39.3359	-3.94934	1.30389
356.574	32.6735	74.0961	-1.97829	1.64193		356.545	32.6735	39.1573	-3.77827	1.30368
357.074	32.724	73.9959	-1.97591	1.64695		357.045	32.724	38.757	-3.61356	1.30391
357.574	32.7744	73.8959	-1.97036	1.64916		357.545	32.7744	38.7534	-3.4554	1.30568
358.074	32.8247	73.7969	-1.96205	1.65096		358.045	32.8247	38.5525	-3.30479	1.30647
358.574	32.8751	73.6985	-1.95162	1.6522		358.545	32.8751	38.4228	-3.16119	1.30804
359.074	32.9253	73.6012	-1.93992	1.65997		359.045	32.9253	38.2527	-3.0244	1.30927
359.574	32.9756	73.5047	-1.92765	1.66293		359.545	32.9756	38.1514	-2.89341	1.30929
360.074	33.0259	73.409	-1.91528	1.66693		360.045	33.0259	38.0445	-2.76814	1.3108
360.574	33.0761	73.314	-1.90284	1.66767		360.545	33.0761	37.8075	-2.64742	1.3113
361.074	33.1264	73.2189	-1.88991	1.66868		361.045	33.1264	38.0044	-2.53156	1.31068
361.574	33.1767	73.1244	-1.87597	1.67128		361.545	33.1767	37.5652	-2.42041	1.31223
362.074	33.2269	73.0297	-1.86024	1.67722		362.045	33.2269	37.5629	-2.31462	1.31378
362.574	33.277	72.9359	-1.84233	1.6799		362.545	33.277	37.5431	-2.21466	1.31593
363.074	33.3272	72.8428	-1.82215	1.68249		363.045	33.3272	37.3538	-2.12128	1.31575
363.574	33.3774	72.7509	-1.80016	1.69251		363.545	33.3774	37.2769	-2.03506	1.3176
364.074	33.4277	72.6607	-1.77758	1.69427		364.045	33.4277	37.1393	-1.9558	1.31811
364.574	33.4779	72.5722	-1.75594	1.69347		364.545	33.4779	37.1173	-1.8832	1.31927
365.074	33.5282	72.4858	-1.73725	1.69871		365.045	33.5282	36.9922	-1.81629	1.32144
365.574	33.5784	72.4012	-1.72335	1.70136		365.545	33.5784	36.8625	-1.75412	1.32254
366.074	33.6286	72.3178	-1.71569	1.70199		366.045	33.6286	36.8683	-1.69632	1.32355
366.574	33.6788	72.2349	-1.715	1.70845		366.545	33.6788	36.6041	-1.64222	1.32695
367.074	33.729	72.1517	-1.72097	1.71274		367.045	33.729	36.71	-1.59167	1.32812
367.574	33.7791	72.0675	-1.73211	1.71704		367.545	33.7791	36.6674	-1.5443	1.33078
368.074	33.8293	71.9813	-1.74597	1.71411		368.045	33.8293	36.5228	-1.50003	1.32891
368.574	33.8794	71.8929	-1.75948	1.71861		368.545	33.8794	36.5525	-1.45842	1.33139
369.074	33.9295	71.8023	-1.76956	1.72488		369.045	33.9295	36.2938	-1.41915	1.33489
369.574	33.9796	71.7097	-1.77367	1.73198		369.545	33.9796	36.3833	-1.382	1.33666
370.074	34.0296	71.6167	-1.77022	1.72827		370.045	34.0296	36.3152	-1.34671	1.33929
370.574	34.0796	71.5247	-1.75906	1.73591		370.545	34.0796	36.1391	-1.31375	1.34109
371.074	34.1296	71.4343	-1.74116	1.7341		371.045	34.1296	36.0805	-1.28344	1.34145
371.574	34.1796	71.3464	-1.71864	1.7438		371.545	34.1796	36.1743	-1.25601	1.34525
372.074	34.2295	71.2613	-1.69401	1.74445		372.045	34.2295	35.9769	-1.23138	1.34731
372.574	34.2794	71.1783	-1.66965	1.74538		372.545	34.2794	35.8123	-1.20913	1.35004
373.074	34.3291	71.0972	-1.64757	1.75349		373.045	34.3291	35.867	-1.1885	1.35069
373.574	34.3789	71.0168	-1.62883	1.75811		373.545	34.3789	35.9292	-1.16856	1.3528
374.074	34.4286	70.9369	-1.61387	1.75489		374.045	34.4286	35.8484	-1.14857	1.35803
374.574	34.4782	70.8571	-1.60253	1.76386		374.545	34.4782	35.6977	-1.12819	1.36158
375.074	34.5279	70.7772	-1.59429	1.76692		375.045	34.5279	35.6718	-1.10697	1.36192
375.574	34.5775	70.6978	-1.58861	1.77372		375.545	34.5775	35.6041	-1.08527	1.3654
376.074	34.627	70.6181	-1.58483	1.77643		376.045	34.627	35.5411	-1.06349	1.3694
376.574	34.6766	70.5389	-1.58255	1.77731		376.545	34.6766	35.6045	-1.04218	1.37187
377.074	34.7261	70.46	-1.58141	1.78351		377.045	34.7261	35.4224	-1.02217	1.3744
377.574	34.7756	70.3812	-1.58116	1.78912		377.545	34.7756	35.3182	-1.00393	1.37587
378.074	34.8251	70.3025	-1.58151	1.78625		378.045	34.8251	35.2705	-0.98782	1.37941
378.574	34.8747	70.2238	-1.58204	1.78772		378.545	34.8747	35.3225	-0.97349	1.38122
379.074	34.9241	70.1448	-1.58219	1.79126		379.045	34.9241	35.3411	-0.96046	1.38514
379.574	34.9735	70.0655	-1.58125	1.79492		379.545	34.9735	35.1659	-0.9482	1.38693
380.074	35.023	69.9857	-1.57839	1.80172		380.045	35.023	35.1982	-0.93647	1.38983
380.574	35.0724	69.9057	-1.57291	1.80241		380.545	35.0724	35.147	-0.92529	1.39268
381.074	35.1218	69.8259	-1.56434	1.81093		381.045	35.1218	35.0821	-0.91494	1.39485
381.574	35.1713	69.7465	-1.55259	1.80815		381.545	35.1713	34.9885	-0.90562	1.39629
382.074	35.2207	69.6682	-1.53809	1.81475		382.045	35.2207	34.8699	-0.89725	1.40091
382.574	35.2702	69.591	-1.52166	1.81615		382.545	35.2702	34.9796	-0.88955	1.40243
383.074	35.3196	69.5156	-1.50458	1.82263		383.045	35.3196	34.8094	-0.88214	1.40285
383.574	35.3691	69.4416	-1.48822	1.82689		383.545	35.3691	34.9126	-0.87492	1.40676
384.074	35.4186	69.3687	-1.47393	1.82785		384.045	35.4186	34.8382	-0.86815	1.40686
384.574	35.4682	69.2966	-1.46294	1.83169		384.545	35.4682	34.7632	-0.86244	1.40976
385.074	35.5178	69.2249	-1.45619	1.83233		385.045	35.5178	34.963	-0.85866	1.41437
385.574	35.5674	69.1534	-1.45433	1.83485		385.545	35.5674	34.5459	-0.85733	1.41872
386.074	35.617	69.082	-1.45758	1.83969		386.045	35.617	34.6964	-0.85847	1.41987
386.574	35.6666	69.0106	-1.46567	1.84352		386.545	35.6666	34.5426	-0.86173	1.42339
387.074	35.7161	68.9382	-1.47791	1.84903		387.045	35.7161	34.661	-0.86633	1.42561
387.574	35.7658	68.8648	-1.49313	1.85061		387.545	35.7658	34.556	-0.87131	1.42683
388.074	35.8154	68.7898	-1.50998	1.85407		388.045	35.8154	34.3973	-0.87579	1.43105
388.574	35.865	68.713	-1.52697	1.86127		388.545	35.865	34.6236	-0.87909	1.4343
389.074	35.9146	68.635	-1.54277	1.86228		389.045	35.9146	34.2793	-0.88077	1.43537
389.574	35.9642	68.5558	-1.55641	1.8644		389.545	35.9642	34.3302	-0.88074	1.43935
390.074	36.0138	68.476	-1.56715	1.86499		390.045	36.0138	34.4154	-0.87915	1.44109
390.574	36.0636	68.3961	-1.57463	1.86827		390.545	36.0636	34.3694	-0.87626	1.44349
391.074	36.1135	68.3163	-1.5787	1.87727		391.045	36.1135	34.1545	-0.8724	1.44638
391.574	36.1635	68.2367	-1.57923	1.87573		391.545	36.1635	34.1998	-0.86782	1.45116
392.074	36.2136	68.1569	-1.57603	1.87748		392.045	36.2136	34.2421	-0.8627	1.45159
392.574	36.2636	68.0773	-1.56873	1.88482		392.545	36.2636	33.9689	-0.85716	1.45564
393.074	36.3137	67.9978	-1.55695	1.88577		393.045	36.3137	34.1327	-0.85144	1.45634
393.574	36.3638	67.9185	-1.54027	1.89294		393.545	36.3638	33.8588	-0.84568	1.46001
394.074	36.414	67.8402	-1.51873	1.89196		394.045	36.414	33.9158	-0.83997	1.46323
394.574	36.4642	67.7629	-1.49256	1.89972		394.545	36.4642	33.8745	-0.83443	1.46518
395.074	36.5145	67.6874	-1.46284	1.89741		395.045	36.5145	33.8255	-0.8288	1.46727
395.574	36.5646	67.6142	-1.43114	1.90419		395.545	36.5646	33.8753	-0.82275	1.46997
396.074	36.6147	67.543	-1.39938	1.9101		396.045	36.6147	33.7153	-0.81578	1.47145
396.574	36.6646	67.4747	-1.37027	1.91017		396.545	36.6646	33.8876	-0.80749	1.47357
397.074	36.7146	67.4086	-1.34592	1.91604		397.045	36.7146	33.6465	-0.79757	1.47691
397.574	36.7645	67.3448	-1.32858	1.91576		397.545	36.7645	33.7053	-0.78613	1.47826
398.074	36.8146	67.2823	-1.31934	1.92543		398.045	36.8146	33.601	-0.77365	1.48089
398.574	36.8646	67.2202	-1.3183	1.93044		398.545	36.8646	33.5186	-0.7609	1.48529
399.074	36.9148	67.1572	-1.3244	1.92955		399.045	36.9148	33.6079	-0.74868	1.48361
399.574	36.9649	67.0923	-1.33562	1.93425		399.545	36.9649	33.4226	-0.73783	1.48798
400.074	37.0151	67.0251	-1.34923	1.943		400.045	37.0151	33.6731	-0.72888	1.48949
400.574	37.0653	66.9557	-1.36246	1.94206		400.545	37.0653	33.3297	-0.72191	1.49248
401.074	37.1155	66.8848	-1.37288	1.9439		401.045	37.1155	33.3924	-0.71678	1.49371
401.574	37.1657	66.8135	-1.37894	1.95204		401.545	37.1657	33.4848	-0.71317	1.49702
402.074	37.2159	66.7422	-1.38014	1.94897		402.045	37.2159	33.2338	-0.7108	1.49891
402.574	37.2662	66.6718	-1.3769	1.95431		402.545	37.2662	33.4288	-0.70953	1.50264
403.074	37.3165	66.6025	-1.37039	1.96088		403.045	37.3165	33.2265	-0.70927	1.50305
403.574	37.3668	66.5342	-1.36215	1.95701		403.545	37.3668	33.13	-0.70994	1.50489
404.074	37.4171	66.4672	-1.35381	1.96685		404.045	37.4171	33.293	-0.71136	1.50655
404.574	37.4674	66.4006	-1.34661	1.97243		404.545	37.4674	33.2249	-0.71321	1.50875
405.074	37.5177	66.3346	-1.34149	1.97038		405.045	37.5177	33.078	-0.71525	1.51047
405.574	37.568	66.2686	-1.33886	1.97741		405.545	37.568	33.1507	-0.71725	1.51391
406.074	37.6183	66.2023	-1.33869	1.97607		406.045	37.6183	32.9591	-0.7192	1.51519
406.574	37.6687	66.1359	-1.3406	1.97789		406.545	37.6687	33.0018	-0.72111	1.51923
407.074	37.719	66.0689	-1.34394	1.98032		407.045	37.719	32.9731	-0.72316	1.51948
407.574	37.7693	66.0015	-1.34792	1.98338		407.545	37.7693	32.9066	-0.72515	1.52313
408.074	37.8196	65.9338	-1.35167	1.99087		408.045	37.8196	33.0118	-0.72668	1.52455
408.574	37.8698	65.8658	-1.35441	1.99161		408.545	37.8698	32.8711	-0.72724	1.52896
409.074	37.9199	65.7974	-1.35552	1.99688		409.045	37.9199	32.8811	-0.72633	1.52937
409.574	37.9701	65.7286	-1.35469	1.99696		409.545	37.9701	32.823	-0.72387	1.53173
410.074	38.0202	65.6597	-1.35199	2.0036		410.045	38.0202	32.7281	-0.72005	1.53515
410.574	38.0704	65.5911	-1.34784	2.00872		410.545	38.0704	32.655	-0.71529	1.53678
411.074	38.1205	65.5237	-1.34297	2.00754		411.045	38.1205	32.6239	-0.71027	1.53666
411.574	38.1706	65.4573	-1.33813	2.01255		411.545	38.1706	32.865	-0.70546	1.53774
412.074	38.2207	65.3916	-1.3339	2.01335		412.045	38.2207	32.4648	-0.70097	1.54113
412.574	38.2707	65.3261	-1.33054	2.01466		412.545	38.2707	32.7685	-0.69687	1.54309
413.074	38.3207	65.26	-1.32793	2.01841		413.045	38.3207	32.5235	-0.69295	1.54516
413.574	38.3707	65.1932	-1.32579	2.02093		413.545	38.3707	32.4935	-0.68884	1.5467
414.074	38.4208	65.1259	-1.32384	2.02522		414.045	38.4208	32.5845	-0.68433	1.54805
414.574	38.4709	65.059	-1.32205	2.02764		414.545	38.4709	32.4169	-0.67916	1.54924
415.074	38.5211	64.9927	-1.32064	2.03563		415.045	38.5211	32.4585	-0.67336	1.55281
415.574	38.5712	64.9275	-1.32004	2.04066		415.545	38.5712	32.1557	-0.66735	1.55694
416.074	38.6213	64.8627	-1.3206	2.03809		416.045	38.6213	32.5037	-0.6615	1.5571
416.574	38.6714	64.7978	-1.3224	2.04363		416.545	38.6714	32.1759	-0.65627	1.55745
417.074	38.7214	64.7327	-1.32501	2.04706		417.045	38.7214	32.2198	-0.65178	1.5615
417.574	38.7715	64.6663	-1.32754	2.04429		417.545	38.7715	32.4644	-0.64777	1.56086
418.074	38.8217	64.5988	-1.32881	2.05442		418.045	38.8217	32.1442	-0.64367	1.56452
418.574	38.8718	64.5309	-1.32767	2.05121		418.545	38.8718	32.2734	-0.63907	1.56669
419.074	38.9219	64.4625	-1.32328	2.05513		419.045	38.9219	32.0348	-0.63365	1.56809
419.574	38.972	64.3946	-1.31534	2.0563		419.545	38.972	32.2414	-0.62776	1.56994
420.074	39.022	64.3276	-1.30416	2.06123		420.045	39.022	32.1315	-0.62235	1.57168
420.574	39.072	64.2618	-1.29052	2.06922		420.545	39.072	31.9582	-0.61845	1.5733
421.074	39.1221	64.1977	-1.2756	2.07253		421.045	39.1221	32.0798	-0.61697	1.57512
421.574	39.1721	64.1347	-1.26049	2.07486		421.545	39.1721	31.8235	-0.6183	1.57769
422.074	39.2222	64.0728	-1.2463	2.08305		422.045	39.2222	32.0407	-0.62216	1.58038
422.574	39.2724	64.0117	-1.23388	2.08008		422.545	39.2724	31.9342	-0.62765	1.5824
423.074	39.3225	63.9509	-1.22387	2.08791		423.045	39.3225	31.9136	-0.63362	1.58687
423.574	39.3726	63.8905	-1.21694	2.08849		423.545	39.3726	31.9589	-0.63886	1.58731
424.074	39.4227	63.8307	-1.21365	2.09369		424.045	39.4227	31.6244	-0.64256	1.59216
424.574	39.4728	63.7712	-1.21451	2.09496		424.545	39.4728	31.9101	-0.64421	1.59326
425.074	39.523	63.7118	-1.21991	2.10337		425.045	39.523	31.6839	-0.64373	1.59403
425.574	39.5732	63.6521	-1.22996	2.10175		425.545	39.5732	31.8151	-0.64149	1.59674
426.074	39.6234	63.592	-1.24423	2.10819		426.045	39.6234	31.6592	-0.63786	1.59774
426.574	39.6735	63.5305	-1.26188	2.11084		426.545	39.6735	31.7295	-0.63324	1.60096
427.074	39.7236	63.4675	-1.28146	2.11677		427.045	39.7236	31.7791	-0.62804	1.60253
427.574	39.7736	63.4026	-1.30103	2.11714		427.545	39.7736	31.5565	-0.62242	1.60352
428.074	39.8236	63.3357	-1.31862	2.12429		428.045	39.8236	31.7314	-0.6165	1.60717
428.574	39.8736	63.2672	-1.33219	2.12004		428.545	39.8736	31.574	-0.61039	1.60899
429.074	39.9236	63.1977	-1.34022	2.12221		429.045	39.9236	31.4681	-0.60436	1.61097
429.574	39.9736	63.1277	-1.3419	2.12794		429.545	39.9736	31.531	-0.59866	1.61364
430.074	40.0236	63.0579	-1.33726	2.13088		430.045	40.0236	31.4037	-0.59369	1.61542
430.574	40.0737	62.9892	-1.32713	2.13695		430.545	40.0737	31.3335	-0.58959	1.61649
431.074	40.1238	62.9221	-1.31303	2.13957		431.045	40.1238	31.4073	-0.58639	1.61968
431.574	40.1739	62.8569	-1.2968	2.1428		431.545	40.1739	31.3605	-0.58385	1.62261
432.074	40.224	62.7931	-1.28025	2.14327		432.045	40.224	31.274	-0.58147	1.62365
432.574	40.2741	62.7308	-1.26511	2.15424		432.545	40.2741	31.1972	-0.57878	1.62736
433.074	40.3242	62.6692	-1.25242	2.15334		433.045	40.3242	31.4108	-0.57542	1.63045
433.574	40.3743	62.6076	-1.24276	2.15346		433.545	40.3743	31.284	-0.57112	1.63355
434.074	40.4244	62.5465	-1.23637	2.16086		434.045	40.4244	31.0995	-0.56601	1.63522
434.574	40.4745	62.4854	-1.23288	2.16568		434.545	40.4745	31.2458	-0.56035	1.64016
435.074	40.5245	62.4245	-1.23171	2.16794		435.045	40.5245	31.1618	-0.55438	1.64314
435.574	40.5746	62.3634	-1.23195	2.17665		435.545	40.5746	31.2662	-0.54848	1.64435
436.074	40.6247	62.302	-1.23246	2.18003		436.045	40.6247	31.0789	-0.54307	1.64571
436.574	40.6748	62.2401	-1.23197	2.18571		436.545	40.6748	31.1159	-0.53835	1.64645
437.074	40.7248	62.1773	-1.22925	2.1896		437.045	40.7248	31.1374	-0.53464	1.6469
437.574	40.7748	62.1143	-1.22335	2.19356		437.545	40.7748	30.8788	-0.53202	1.65119
438.074	40.8248	62.0514	-1.21377	2.1993		438.045	40.8248	31.1996	-0.53068	1.65304
438.574	40.8748	61.9892	-1.20072	2.20354		438.545	40.8748	30.836	-0.53082	1.65414
439.074	40.9247	61.9282	-1.18502	2.20428		439.045	40.9247	31.0476	-0.53267	1.6587
439.574	40.9747	61.8691	-1.16817	2.21887		439.545	40.9747	30.99	-0.53625	1.66105
440.074	41.0248	61.8117	-1.15181	2.21978		440.045	41.0248	30.8152	-0.54143	1.66211
440.574	41.0749	61.756	-1.1377	2.21752		440.545	41.0749	31.0329	-0.54789	1.66715
441.074	41.125	61.7013	-1.12702	2.22518		441.045	41.125	30.8445	-0.55498	1.66777
441.574	41.1751	61.6471	-1.12051	2.22699		441.545	41.1751	31.0134	-0.56186	1.67268
442.074	41.2252	61.5929	-1.11819	2.23443		442.045	41.2252	30.6316	-0.56768	1.67498
442.574	41.2752	61.538	-1.11956	2.2373		442.545	41.2752	30.8659	-0.57158	1.67669
443.074	41.3252	61.4826	-1.12372	2.23995		443.045	41.3252	30.6733	-0.5731	1.67823
443.574	41.3752	61.4263	-1.12966	2.24121		443.545	41.3752	30.7611	-0.5721	1.68025
444.074	41.4251	61.3693	-1.13631	2.24767		444.045	41.4251	30.6786	-0.56873	1.68523
444.574	41.4752	61.3117	-1.1429	2.25195		444.545	41.4752	30.6784	-0.56344	1.68806
445.074	41.5252	61.254	-1.14883	2.25421		445.045	41.5252	30.7307	-0.55668	1.69031
445.574	41.5752	61.1961	-1.15381	2.25624		445.545	41.5752	30.6083	-0.5489	1.69479
446.074	41.6253	61.1383	-1.15767	2.25627		446.045	41.6253	30.6229	-0.5403	1.69613
446.574	41.6754	61.0804	-1.16032	2.26666		446.545	41.6754	30.3706	-0.53111	1.69554
447.074	41.7255	61.0223	-1.1616	2.26658		447.045	41.7255	30.7299	-0.52175	1.70177
447.574	41.7757	60.9639	-1.16136	2.27148		447.545	41.7757	30.444	-0.51261	1.70267
448.074	41.8259	60.905	-1.15953	2.27017		448.045	41.8259	30.4792	-0.50414	1.70611
448.574	41.876	60.8459	-1.15618	2.27659		448.545	41.876	30.276	-0.49691	1.70975
449.074	41.9262	60.7874	-1.15172	2.27403		449.045	41.9262	30.4637	-0.49107	1.71081
449.574	41.9764	60.7295	-1.14679	2.28474		449.545	41.9764	30.3429	-0.48666	1.71317
450.074	42.0265	60.6725	-1.14222	2.28138		450.045	42.0265	30.3107	-0.48343	1.71989
450.574	42.0766	60.6166	-1.13882	2.28707		450.545	42.0766	30.2951	-0.48103	1.71849
451.074	42.1266	60.561	-1.13713	2.29079		451.045	42.1266	30.2574	-0.47897	1.72205
451.574	42.1766	60.5052	-1.13732	2.29305		451.545	42.1766	30.3768	-0.47669	1.72373
452.074	42.2267	60.4487	-1.13919	2.29913		452.045	42.2267	30.2502	-0.47366	1.72728
452.574	42.2769	60.3919	-1.14219	2.29841		452.545	42.2769	30.1599	-0.46934	1.73102
453.074	42.327	60.3345	-1.14563	2.30558		453.045	42.327	30.2778	-0.46336	1.7327
453.574	42.3772	60.2767	-1.14874	2.30466		453.545	42.3772	30.252	-0.45582	1.73384
454.074	42.4273	60.219	-1.15077	2.31224		454.045	42.4273	30.19	-0.44735	1.73842
454.574	42.4774	60.1608	-1.15106	2.3163		454.545	42.4774	30.0984	-0.43898	1.73998
455.074	42.5274	60.1024	-1.14902	2.32198		455.045	42.5274	30.1245	-0.43199	1.7459
455.574	42.5775	60.0439	-1.1442	2.32253		455.545	42.5775	30.1857	-0.42735	1.74804
456.074	42.6275	59.9857	-1.13625	2.32277		456.045	42.6275	29.9306	-0.42573	1.75146
456.574	42.6776	59.928	-1.12493	2.33022		456.545	42.6776	30.1936	-0.42706	1.75223
457.074	42.7277	59.8711	-1.11018	2.33164		457.045	42.7277	30.0047	-0.43088	1.75707
457.574	42.7778	59.8151	-1.09203	2.33834		457.545	42.7778	30.0498	-0.43636	1.75966
458.074	42.8279	59.7602	-1.07089	2.34584		458.045	42.8279	30.0594	-0.44278	1.76243
458.574	42.878	59.7063	-1.04718	2.34877		458.545	42.878	29.8805	-0.4493	1.76419
459.074	42.9282	59.6535	-1.02183	2.35568		459.045	42.9282	30.1153	-0.45529	1.76886
459.574	42.9783	59.6024	-0.9964	2.35644		459.545	42.9783	29.8594	-0.46011	1.77439
460.074	43.0283	59.5533	-0.97273	2.35984		460.045	43.0283	29.9863	-0.46343	1.77801
460.574	43.0783	59.5065	-0.95304	2.36672		460.545	43.0783	29.8865	-0.46522	1.7787
461.074	43.1283	59.4618	-0.93959	2.37082		461.045	43.1283	29.9229	-0.4658	1.78309
461.574	43.1782	59.4184	-0.93418	2.3763		461.545	43.1782	29.9714	-0.46573	1.78384
462.074	43.2283	59.3755	-0.93801	2.37977		462.045	43.2283	29.8055	-0.46544	1.7877
462.574	43.2783	59.3321	-0.95122	2.38502		462.545	43.2783	29.8434	-0.46508	1.79034
463.074	43.3284	59.2871	-0.9728	2.38467		463.045	43.3284	29.759	-0.46451	1.79491
463.574	43.3784	59.2398	-1.00065	2.3935		463.545	43.3784	29.6504	-0.46328	1.79967
464.074	43.4284	59.1893	-1.03204	2.39415		464.045	43.4284	29.7153	-0.46102	1.8009
464.574	43.4785	59.1359	-1.06369	2.39589		464.545	43.4785	29.6916	-0.4577	1.80418
465.074	43.5285	59.0797	-1.0923	2.40513		465.045	43.5285	29.8017	-0.45363	1.80638
465.574	43.5785	59.0213	-1.11513	2.41205		465.545	43.5785	29.4794	-0.44953	1.81138
466.074	43.6286	58.9618	-1.13033	2.41061		466.045	43.6286	29.6345	-0.446	1.81396
466.574	43.6787	58.9019	-1.13709	2.41842		466.545	43.6787	29.5761	-0.44361	1.81607
467.074	43.7288	58.8422	-1.13557	2.42146		467.045	43.7288	29.5968	-0.44247	1.82168
467.574	43.7788	58.7837	-1.12674	2.42795		467.545	43.7788	29.631	-0.44237	1.82355
468.074	43.8289	58.7262	-1.11205	2.43329		468.045	43.8289	29.4801	-0.44265	1.82587
468.574	43.8789	58.6707	-1.09338	2.4358		468.545	43.8789	29.637	-0.44256	1.82687
469.074	43.929	58.6166	-1.07244	2.43556		469.045	43.929	29.4902	-0.44139	1.82987
469.574	43.979	58.5641	-1.05079	2.44526		469.545	43.979	29.4258	-0.4388	1.83391
470.074	44.029	58.5128	-1.02951	2.44677		470.045	44.029	29.3353	-0.4349	1.83602
470.574	44.0789	58.4623	-1.00932	2.45198		470.545	44.0789	29.3658	-0.43016	1.84037
471.074	44.1288	58.4128	-0.9906	2.45912		471.045	44.1288	29.4635	-0.42543	1.84176
471.574	44.1787	58.3638	-0.97347	2.46447		471.545	44.1787	29.2666	-0.42134	1.84432
472.074	44.2285	58.3158	-0.95807	2.46864		472.045	44.2285	29.4434	-0.41835	1.84678
472.574	44.2784	58.2688	-0.94429	2.46919		472.545	44.2784	29.3442	-0.4163	1.84887
473.074	44.3284	58.2226	-0.9321	2.4709		473.045	44.3284	29.3998	-0.41472	1.84602
473.574	44.3784	58.177	-0.9213	2.47986		473.545	44.3784	29.3381	-0.4129	1.84506
474.074	44.4284	58.1315	-0.91156	2.4893		474.045	44.4284	29.2962	-0.41021	1.84178
474.574	44.4784	58.0863	-0.90258	2.48812		474.545	44.4784	29.3301	-0.40644	1.83156
475.074	44.5284	58.0411	-0.89386	2.49513		475.045	44.5284	29.2497	-0.40154	1.83031
475.574	44.5784	57.9962	-0.88508	2.5026		475.545	44.5784	29.2619	-0.39594	1.82318
476.074	44.6285	57.9519	-0.87605	2.50575		476.045	44.6285	29.0437	-0.39011	1.81987
476.574	44.6786	57.9081	-0.86666	2.51687		476.545	44.6786	29.2273	-0.38438	1.81894
477.074	44.7287	57.8652	-0.85714	2.51842		477.045	44.7287	29.1052	-0.37885	1.81565
477.574	44.7787	57.8227	-0.84776	2.5274		477.545	44.7787	29.3497	-0.37324	1.81661
478.074	44.8287	57.7807	-0.83901	2.52916		478.045	44.8287	29.1116	-0.36723	1.81676
478.574	44.8786	57.7392	-0.83154	2.53515		478.545	44.8786	29.2209	-0.36046	1.8209
479.074	44.9285	57.6983	-0.82604	2.54172		479.045	44.9285	28.9758	-0.35283	1.82256
479.574	44.9785	57.6581	-0.82318	2.54346		479.545	44.9785	29.1014	-0.3444	1.82819
480.074	45.0285	57.6184	-0.82338	2.55012		480.045	45.0285	28.9368	-0.33569	1.83066
480.574	45.0787	57.5787	-0.82665	2.55423		480.545	45.0787	29.0791	-0.32742	1.83318
481.074	45.1288	57.5385	-0.83245	2.5612		481.045	45.1288	29.0402	-0.32019	1.8376
481.574	45.179	57.4975	-0.83966	2.56915		481.545	45.179	28.8866	-0.31455	1.84316
482.074	45.2292	57.4552	-0.84664	2.57014		482.045	45.2292	29.0643	-0.31066	1.84874
482.574	45.2793	57.4116	-0.85152	2.57698		482.545	45.2793	28.9214	-0.30849	1.85279
483.074	45.3294	57.3671	-0.85259	2.57989		483.045	45.3294	29.0373	-0.30781	1.85538
483.574	45.3794	57.3221	-0.84859	2.59021		483.545	45.3794	28.8678	-0.3084	1.85979
484.074	45.4294	57.2773	-0.83904	2.59222		484.045	45.4294	28.9676	-0.31007	1.86833
484.574	45.4794	57.2332	-0.82438	2.5997		484.545	45.4794	28.8294	-0.31272	1.87343
485.074	45.5294	57.191	-0.80615	2.60205		485.045	45.5294	28.8307	-0.31624	1.88018
485.574	45.5794	57.1509	-0.78649	2.6031		485.545	45.5794	28.9329	-0.32039	1.88539
486.074	45.6294	57.1132	-0.7679	2.60821		486.045	45.6294	28.917	-0.32484	1.8885
486.574	45.6794	57.0776	-0.75273	2.6148		486.545	45.6794	29.0016	-0.32899	1.89631
487.074	45.7294	57.0433	-0.74264	2.62274		487.045	45.7294	28.8104	-0.33225	1.90219
487.574	45.7794	57.0095	-0.7383	2.62381		487.545	45.7794	28.9009	-0.33411	1.91848
488.074	45.8294	56.9753	-0.7392	2.63458		488.045	45.8294	28.8235	-0.33418	1.92938
488.574	45.8794	56.9396	-0.74364	2.63531		488.545	45.8794	28.9321	-0.33241	1.94053
489.074	45.9293	56.902	-0.74911	2.63718		489.045	45.9293	28.7652	-0.32911	1.9482
489.574	45.9793	56.8626	-0.75271	2.64363		489.545	45.9793	28.7657	-0.32484	1.95453
490.074	46.0292	56.8219	-0.75186	2.64978		490.045	46.0292	28.7474	-0.32027	1.96333
490.574	46.0791	56.7811	-0.74474	2.65286		490.545	46.0791	28.7213	-0.31589	1.96901
491.074	46.129	56.7409	-0.73066	2.6624		491.045	46.129	28.684	-0.31208	1.97588
491.574	46.179	56.7026	-0.71005	2.66202		491.545	46.179	28.5725	-0.30912	1.98196
492.074	46.2289	56.6664	-0.68419	2.67155		492.045	46.2289	28.5577	-0.30708	1.98453
492.574	46.279	56.6328	-0.65511	2.67401		492.545	46.279	28.5738	-0.30603	1.99143
493.074	46.329	56.6013	-0.62475	2.67942		493.045	46.329	28.775	-0.30603	1.99517
493.574	46.379	56.5718	-0.5953	2.69027		493.545	46.379	28.5646	-0.30713	2.00092
494.074	46.4291	56.544	-0.56869	2.68954		494.045	46.4291	28.5803	-0.30906	2.00975
494.574	46.4792	56.5175	-0.54645	2.69146		494.545	46.4792	28.4654	-0.31131	2.01047
495.074	46.5293	56.4923	-0.52993	2.70049		495.045	46.5293	28.6268	-0.31302	2.01307
495.574	46.5794	56.468	-0.51996	2.70313		495.545	46.5794	28.5588	-0.3134	2.01531
496.074	46.6295	56.4444	-0.5171	2.70694		496.045	46.6295	28.5248	-0.31179	2.02058
496.574	46.6796	56.421	-0.5215	2.71047		496.545	46.6796	28.6226	-0.30804	2.0233
497.074	46.7297	56.3972	-0.53281	2.71718		497.045	46.7297	28.6265	-0.30243	2.02907
497.574	46.7797	56.3724	-0.55002	2.72099		497.545	46.7797	28.6708	-0.29562	2.03402
498.074	46.8297	56.3459	-0.57159	2.72764		498.045	46.8297	28.4539	-0.28853	2.03775
498.574	46.8797	56.3173	-0.59548	2.73177		498.545	46.8797	28.4713	-0.28208	2.04277
499.074	46.9297	56.2865	-0.61923	2.73939		499.045	46.9297	28.4455	-0.27704	2.04671
499.574	46.9797	56.2534	-0.64061	2.74371		499.545	46.9797	28.6011	-0.27396	2.05076
500.074	47.0297	56.2185	-0.65768	2.74577		500.045	47.0297	28.4137	-0.2731	2.05362
500.574	47.0798	56.1825	-0.66916	2.7474		500.545	47.0798	28.5297	-0.27453	2.0555
501.074	47.1298	56.1463	-0.6747	2.75219		501.045	47.1298	28.4471	-0.27798	2.0598
501.574	47.1799	56.1106	-0.67473	2.75682		501.545	47.1799	28.329	-0.28294	2.06356
502.074	47.2299	56.076	-0.67036	2.76368		502.045	47.2299	28.4275	-0.28873	2.06504
502.574	47.2799	56.0426	-0.66301	2.76566		502.545	47.2799	28.1577	-0.2946	2.07036
503.074	47.33	56.0102	-0.65411	2.76748		503.045	47.33	28.5153	-0.29981	2.07441
503.574	47.38	55.9785	-0.64487	2.77542		503.545	47.38	28.2889	-0.30383	2.07794
504.074	47.43	55.9471	-0.63603	2.77436		504.045	47.43	28.434	-0.30647	2.08121
504.574	47.48	55.9159	-0.628	2.77818		504.545	47.48	28.2222	-0.3078	2.08539
505.074	47.5299	55.8849	-0.62079	2.78047		505.045	47.5299	28.3009	-0.30816	2.08517
505.574	47.5799	55.8539	-0.61426	2.78951		505.545	47.5799	28.2247	-0.30784	2.08722
506.074	47.6297	55.8233	-0.60831	2.79242		506.045	47.6297	28.3088	-0.30722	2.08927
506.574	47.6796	55.7931	-0.60284	2.79695		506.545	47.6796	28.3159	-0.30661	2.09527
507.074	47.7294	55.7631	-0.59798	2.80105		507.045	47.7294	28.1044	-0.30618	2.09392
507.574	47.7792	55.7334	-0.59403	2.8066		507.545	47.7792	28.2792	-0.30614	2.10162
508.074	47.829	55.7039	-0.5914	2.80583		508.045	47.829	28.2208	-0.30648	2.10335
508.574	47.8789	55.675	-0.59058	2.82035		508.545	47.8789	28.2696	-0.30712	2.1082
509.074	47.9288	55.6465	-0.5919	2.81893		509.045	47.9288	28.0469	-0.30781	2.11201
509.574	47.9787	55.618	-0.59542	2.82673		509.545	47.9787	28.2346	-0.30829	2.11395
510.074	48.0286	55.5893	-0.60076	2.84048		510.045	48.0286	28.1747	-0.30818	2.11592
510.574	48.0785	55.5598	-0.60711	2.83507		510.545	48.0785	28.2755	-0.3072	2.11858
511.074	48.1284	55.5293	-0.61319	2.84725		511.045	48.1284	28.0938	-0.30525	2.12233
511.574	48.1783	55.4977	-0.61745	2.85089		511.545	48.1783	28.2167	-0.30238	2.12671
512.074	48.2281	55.465	-0.61841	2.86325		512.045	48.2281	28.0072	-0.29882	2.12716
512.574	48.278	55.4318	-0.61489	2.86461		512.545	48.278	28.1484	-0.29482	2.12873
513.074	48.3278	55.3989	-0.60638	2.86455		513.045	48.3278	28.0056	-0.29077	2.13257
513.574	48.3778	55.3667	-0.59313	2.87301		513.545	48.3778	28.104	-0.28694	2.13468
514.074	48.4277	55.336	-0.57615	2.87801		514.045	48.4277	27.9515	-0.28355	2.13797
514.574	48.4777	55.3072	-0.55712	2.88508		514.545	48.4777	27.9833	-0.28068	2.14158
515.074	48.5276	55.2804	-0.53787	2.89784		515.045	48.5276	27.9588	-0.27821	2.14509
515.574	48.5774	55.2555	-0.52015	2.89809		515.545	48.5774	27.8477	-0.27595	2.14455
516.074	48.6273	55.2317	-0.50533	2.90896		516.045	48.6273	27.907	-0.27345	2.14726
516.574	48.6772	55.2087	-0.49408	2.91233		516.545	48.6772	27.9974	-0.27052	2.15074
517.074	48.7272	55.1855	-0.48636	2.92347		517.045	48.7272	27.9617	-0.26688	2.15221
517.574	48.7773	55.1621	-0.48152	2.92885		517.545	48.7773	27.9731	-0.26251	2.15458
518.074	48.8273	55.138	-0.47857	2.93217		518.045	48.8273	27.863	-0.25758	2.15931
518.574	48.8773	55.1137	-0.47642	2.94204		518.545	48.8773	27.7367	-0.25222	2.16212
519.074	48.9273	55.0891	-0.47422	2.94957		519.045	48.9273	27.9625	-0.24668	2.16332
519.574	48.9772	55.0648	-0.47145	2.95998		519.545	48.9772	27.8238	-0.24118	2.16616
520.074	49.0272	55.0408	-0.46805	2.96293		520.045	49.0272	28.004	-0.23608	2.1679
520.574	49.0773	55.0173	-0.46425	2.96814		520.545	49.0773	27.7528	-0.23172	2.16908
521.074	49.1273	54.9944	-0.4605	2.9782		521.045	49.1273	27.9107	-0.22847	2.16995
521.574	49.1773	54.972	-0.45721	2.98729		521.545	49.1773	27.6487	-0.22656	2.17417
522.074	49.2273	54.9499	-0.45462	2.99185		522.045	49.2273	27.79	-0.22607	2.17633
522.574	49.2773	54.9279	-0.45272	2.99957		522.545	49.2773	27.6461	-0.22678	2.17569
523.074	49.3274	54.9055	-0.45125	3.00773		523.045	49.3274	27.8407	-0.22826	2.17857
523.574	49.3774	54.8826	-0.44982	3.01401		523.545	49.3774	27.8402	-0.22996	2.18045
524.074	49.4273	54.8595	-0.44808	3.02246		524.045	49.4273	27.7984	-0.2314	2.18063
524.574	49.4772	54.8364	-0.44592	3.02908		524.545	49.4772	27.7679	-0.23253	2.18225
525.074	49.5272	54.8136	-0.44343	3.03974		525.045	49.5272	27.7293	-0.23332	2.18562
525.574	49.5772	54.7915	-0.44101	3.0444		525.545	49.5772	27.7043	-0.2341	2.18402
526.074	49.6272	54.7702	-0.4391	3.04394		526.045	49.6272	27.6756	-0.23527	2.18761
526.574	49.6773	54.749	-0.43805	3.05832		526.545	49.6773	27.7281	-0.2371	2.18649
527.074	49.7274	54.7279	-0.43797	3.06198		527.045	49.7274	27.7613	-0.23989	2.18922
527.574	49.7775	54.7065	-0.43864	3.07154		527.545	49.7775	27.7513	-0.24357	2.18782
528.074	49.8277	54.6846	-0.43961	3.08149		528.045	49.8277	27.7675	-0.24801	2.18792
528.574	49.8777	54.6623	-0.44034	3.08952		528.545	49.8777	27.7121	-0.25273	2.19024
529.074	49.9278	54.6397	-0.44036	3.10236		529.045	49.9278	27.7408	-0.25702	2.1912
529.574	49.9778	54.617	-0.43947	3.10966		529.545	49.9778	27.5846	-0.26009	2.19222
530.074	50.0278	54.5946	-0.43776	3.11513		530.045	50.0278	27.6776	-0.26113	2.19167
530.574	50.0778	54.5726	-0.43563	3.13557		530.545	50.0778	27.5125	-0.25971	2.19682
531.074	50.1278	54.5511	-0.43367	3.13643		531.045	50.1278	27.6477	-0.25566	2.19509
531.574	50.1779	54.5301	-0.43248	3.14663		531.545	50.1779	27.5849	-0.24917	2.19868
532.074	50.228	54.5095	-0.43244	3.1552		532.045	50.228	27.5989	-0.24069	2.19839
532.574	50.2781	54.4889	-0.43356	3.1648		532.545	50.2781	27.5397	-0.23069	2.20032
533.074	50.3282	54.468	-0.43536	3.17004		533.045	50.3282	27.6419	-0.21985	2.20077
533.574	50.3782	54.4465	-0.43689	3.17513		533.545	50.3782	27.4359	-0.20875	2.20449
534.074	50.4282	54.4243	-0.43683	3.18007		534.045	50.4282	27.4814	-0.19792	2.20351
534.574	50.4781	54.4013	-0.43375	3.18947		534.545	50.4781	27.6084	-0.18817	2.20681
535.074	50.5281	54.378	-0.42642	3.1929		535.045	50.5281	27.4765	-0.18006	2.21023
535.574	50.578	54.3545	-0.41393	3.1964		535.545	50.578	27.4645	-0.17409	2.21096
536.074	50.628	54.3319	-0.39625	3.19836		536.045	50.628	27.4753	-0.17042	2.21525
536.574	50.678	54.3108	-0.37403	3.20423		536.545	50.678	27.4462	-0.16874	2.21269
537.074	50.728	54.2917	-0.34875	3.21049		537.045	50.728	27.6153	-0.16849	2.21337
537.574	50.778	54.2749	-0.32248	3.21404		537.545	50.778	27.3012	-0.16885	2.21694
538.074	50.828	54.2606	-0.2974	3.22371		538.045	50.828	27.491	-0.16892	2.21713
538.574	50.878	54.2482	-0.27554	3.23045		538.545	50.878	27.4205	-0.16819	2.22072
539.074	50.928	54.2372	-0.2588	3.23675		539.045	50.928	27.5132	-0.16622	2.22222
539.574	50.978	54.2271	-0.24823	3.23924		539.545	50.978	27.3721	-0.16297	2.22373
540.074	51.0279	54.2172	-0.24422	3.24186		540.045	51.0279	27.4507	-0.15859	2.22806
540.574	51.0779	54.207	-0.24647	3.2474		540.545	51.0779	27.4151	-0.15357	2.22751
541.074	51.1278	54.1959	-0.25411	3.25373		541.045	51.1278	27.4799	-0.14866	2.22858
541.574	51.1777	54.1838	-0.2659	3.26114		541.545	51.1777	27.391	-0.14475	2.23011
542.074	51.2277	54.1704	-0.28055	3.26592		542.045	51.2277	27.4861	-0.1427	2.22831
542.574	51.2777	54.1558	-0.2968	3.27382		542.545	51.2777	27.4023	-0.14301	2.23062
543.074	51.3277	54.1401	-0.31356	3.27971		543.045	51.3277	27.4204	-0.14568	2.23172
543.574	51.3777	54.1234	-0.33011	3.27824		543.545	51.3777	27.3231	-0.15004	2.23398
544.074	51.4277	54.106	-0.34599	3.29146		544.045	51.4277	27.4237	-0.15493	2.23634
544.574	51.4777	54.0881	-0.36101	3.29893		544.545	51.4777	27.4972	-0.15924	2.23658
545.074	51.5277	54.0696	-0.37509	3.30199		545.045	51.5277	27.3878	-0.16226	2.23932
545.574	51.5776	54.0505	-0.38795	3.31607		545.545	51.5776	27.4501	-0.16376	2.24206
546.074	51.6276	54.0306	-0.39918	3.31482		546.045	51.6276	27.2414	-0.16416	2.24232
546.574	51.6777	54.0098	-0.40807	3.32528		546.545	51.6777	27.3932	-0.16422	2.245
547.074	51.7277	53.9883	-0.41357	3.33508		547.045	51.7277	27.2443	-0.16443	2.24902
547.574	51.7778	53.9661	-0.4146	3.34116		547.545	51.7778	27.3755	-0.1651	2.24926
548.074	51.8279	53.9435	-0.41009	3.3515		548.045	51.8279	27.3182	-0.16609	2.25293
548.574	51.878	53.9209	-0.39924	3.36146		548.545	51.878	27.4524	-0.16705	2.25191
549.074	51.928	53.8988	-0.38185	3.36984		549.045	51.928	27.221	-0.16773	2.25099
549.574	51.978	53.8776	-0.3585	3.37491		549.545	51.978	27.308	-0.16791	2.2539
550.074	52.028	53.8582	-0.33072	3.37957		550.045	52.028	27.1728	-0.16757	2.255
550.574	52.0781	53.8412	-0.30099	3.38691		550.545	52.0781	27.2535	-0.16683	2.25669
551.074	52.1282	53.8273	-0.27259	3.39543		551.045	52.1282	27.1942	-0.1659	2.25975
551.574	52.1783	53.8165	-0.24877	3.40299		551.545	52.1783	27.2949	-0.1651	2.2631
552.074	52.2284	53.8085	-0.23279	3.4081		552.045	52.2284	27.1915	-0.16473	2.26194
552.574	52.2784	53.8019	-0.22667	3.41364		552.545	52.2784	27.1921	-0.16488	2.26676
553.074	52.3285	53.7954	-0.23105	3.42548		553.045	52.3285	27.2725	-0.16536	2.26472
553.574	52.3785	53.7873	-0.24498	3.42565		553.545	52.3785	27.3466	-0.16587	2.26644
554.074	52.4286	53.7767	-0.26621	3.43412		554.045	52.4286	27.2593	-0.16602	2.27048
554.574	52.4787	53.7629	-0.29174	3.44008		554.545	52.4787	27.0725	-0.16563	2.27281
555.074	52.5287	53.7463	-0.31817	3.44669		555.045	52.5287	27.2817	-0.165	2.27467
555.574	52.5788	53.7274	-0.34268	3.44924		555.545	52.5788	27.02	-0.16492	2.27586
556.074	52.6288	53.7069	-0.36332	3.46235		556.045	52.6288	27.1855	-0.16624	2.27775
556.574	52.6789	53.6858	-0.37919	3.46712		556.545	52.6789	27.1538	-0.16963	2.27885
557.074	52.729	53.665	-0.39062	3.47076		557.045	52.729	27.2369	-0.175	2.28205
557.574	52.779	53.6446	-0.3987	3.47767		557.545	52.779	27.0748	-0.18171	2.2855
558.074	52.8291	53.6248	-0.40475	3.49257		558.045	52.8291	27.0202	-0.18878	2.28798
558.574	52.8791	53.6052	-0.41011	3.49782		558.545	52.8791	27.163	-0.19501	2.28629
559.074	52.9291	53.5853	-0.41567	3.50613		559.045	52.9291	27.1704	-0.19985	2.28796
559.574	52.9791	53.5649	-0.42175	3.5174		559.545	52.9791	27.1103	-0.20325	2.28933
560.074	53.0292	53.5437	-0.42825	3.51988		560.045	53.0292	27.0597	-0.20558	2.29071
560.574	53.0792	53.522	-0.43451	3.53203		560.545	53.0792	27.0236	-0.20746	2.29356
561.074	53.1292	53.4997	-0.43967	3.53969		561.045	53.1292	27.1257	-0.20925	2.29456
561.574	53.1793	53.4769	-0.4428	3.55251		561.545	53.1793	27.0565	-0.211	2.29273
562.074	53.2292	53.4539	-0.44296	3.55543		562.045	53.2292	27.0904	-0.21248	2.29484
562.574	53.2792	53.4305	-0.4395	3.56291		562.545	53.2792	27.0726	-0.21327	2.29556
563.074	53.3291	53.4068	-0.43211	3.57028		563.045	53.3291	26.9631	-0.21299	2.29749
563.574	53.379	53.3837	-0.42108	3.57407		563.545	53.379	27.0135	-0.21134	2.30018
564.074	53.4289	53.3615	-0.40721	3.5813		564.045	53.4289	26.905	-0.20849	2.30174
564.574	53.4788	53.3409	-0.39185	3.58501		564.545	53.4788	27.1189	-0.20472	2.30349
565.074	53.5288	53.3222	-0.37665	3.60031		565.045	53.5288	26.9403	-0.20055	2.30551
565.574	53.5788	53.3052	-0.36292	3.60249		565.545	53.5788	26.9022	-0.19673	2.30506
566.074	53.6289	53.2894	-0.35163	3.60859		566.045	53.6289	26.9328	-0.19407	2.30701
566.574	53.6791	53.2739	-0.34297	3.62102		566.545	53.6791	26.9823	-0.19312	2.30949
567.074	53.7292	53.258	-0.33645	3.62573		567.045	53.7292	26.8671	-0.1937	2.30972
567.574	53.7793	53.2412	-0.33111	3.63338		567.545	53.7793	27.0099	-0.19472	2.31231
568.074	53.8294	53.2237	-0.32591	3.63977		568.045	53.8294	26.7089	-0.19461	2.31286
568.574	53.8794	53.2059	-0.32028	3.65027		568.545	53.8794	27.0161	-0.19176	2.315
569.074	53.9295	53.1886	-0.31433	3.65585		569.045	53.9295	26.7923	-0.18511	2.31939
569.574	53.9795	53.1726	-0.30892	3.66562		569.545	53.9795	26.8695	-0.175	2.3196
570.074	54.0296	53.1583	-0.30537	3.67337		570.045	54.0296	26.9016	-0.16269	2.32085
570.574	54.0797	53.1453	-0.30496	3.6817		570.545	54.0797	26.8864	-0.15031	2.32439
571.074	54.1299	53.1329	-0.30824	3.69185		571.045	54.1299	26.8459	-0.13948	2.32558
571.574	54.1799	53.1203	-0.31463	3.69746		571.545	54.1799	26.7784	-0.13102	2.32577
572.074	54.2299	53.1061	-0.32223	3.68919		572.045	54.2299	26.9142	-0.12491	2.3272
572.574	54.2799	53.0894	-0.32812	3.70059		572.545	54.2799	26.9496	-0.1206	2.32963
573.074	54.33	53.0699	-0.32912	3.70797		573.045	54.33	26.8742	-0.11744	2.33095
573.574	54.3801	53.0484	-0.32262	3.72081		573.545	54.3801	26.8675	-0.11499	2.33163
574.074	54.4302	53.0268	-0.3076	3.72545		574.045	54.4302	26.9588	-0.11324	2.33753
574.574	54.4803	53.0072	-0.28499	3.73485		574.545	54.4803	26.5628	-0.11252	2.33683
575.074	54.5303	52.9917	-0.25777	3.7441		575.045	54.5303	26.7655	-0.113	2.33842
575.574	54.5804	52.981	-0.22998	3.75299		575.545	54.5804	26.7057	-0.11469	2.34068
576.074	54.6306	52.9744	-0.20565	3.75993		576.045	54.6306	26.8797	-0.11736	2.34477
576.574	54.6808	52.9701	-0.18794	3.76293		576.545	54.6808	27.0621	-0.12073	2.34296
577.074	54.731	52.9658	-0.17839	3.77155		577.045	54.731	26.8116	-0.12439	2.34444
577.574	54.7812	52.9599	-0.17682	3.77539		577.545	54.7812	26.9474	-0.12771	2.34723
578.074	54.8314	52.9518	-0.18173	3.78196		578.045	54.8314	26.7346	-0.12977	2.35129
578.574	54.8815	52.9418	-0.19105	3.7885		578.545	54.8815	26.885	-0.12981	2.35281
579.074	54.9317	52.9308	-0.20285	3.79761		579.045	54.9317	26.7111	-0.12743	2.35177
579.574	54.9818	52.9195	-0.21581	3.80314		579.545	54.9818	26.8509	-0.12314	2.3554
580.074	55.0319	52.9083	-0.22938	3.81315		580.045	55.0319	26.7676	-0.11827	2.35737
580.574	55.082	52.8971	-0.24351	3.82099		580.545	55.082	26.9462	-0.11443	2.36058
581.074	55.132	52.8855	-0.25852	3.82646		581.045	55.132	26.5979	-0.11333	2.36381
581.574	55.1821	52.8731	-0.27465	3.83541		581.545	55.1821	26.7175	-0.11556	2.3615
582.074	55.2321	52.8597	-0.29175	3.83902		582.045	55.2321	26.8633	-0.12048	2.36386
582.574	55.2822	52.845	-0.30943	3.84867		582.545	55.2822	26.8279	-0.12662	2.36582
583.074	55.3322	52.8289	-0.32677	3.85001		583.045	55.3322	26.6258	-0.13229	2.37243
583.574	55.3823	52.8115	-0.34266	3.85984		583.545	55.3823	26.8225	-0.13631	2.37528
584.074	55.4323	52.7931	-0.3559	3.86608		584.045	55.4323	26.6638	-0.13842	2.37507
584.574	55.4824	52.7736	-0.36531	3.86848		584.545	55.4824	26.7908	-0.13895	2.37789
585.074	55.5324	52.7535	-0.3699	3.87515		585.045	55.5324	26.7662	-0.13842	2.3811
585.574	55.5824	52.7332	-0.36899	3.88141		585.545	55.5824	26.5626	-0.13735	2.38134
586.074	55.6325	52.7127	-0.36231	3.88735		586.045	55.6325	26.6886	-0.13595	2.38191
586.574	55.6824	52.6928	-0.35018	3.89315		586.545	55.6824	26.7763	-0.13412	2.38354
587.074	55.7324	52.674	-0.3333	3.89657		587.045	55.7324	26.6506	-0.13182	2.3846
587.574	55.7824	52.6567	-0.31286	3.90259		587.545	55.7824	26.6433	-0.12918	2.39085
588.074	55.8324	52.6413	-0.29046	3.90238		588.045	55.8324	26.7189	-0.12622	2.38982
588.574	55.8824	52.6278	-0.26792	3.9154		588.545	55.8824	26.6408	-0.1229	2.39005
589.074	55.9324	52.616	-0.24695	3.91928		589.045	55.9324	26.6182	-0.11925	2.39279
589.574	55.9823	52.6056	-0.22913	3.92641		589.545	55.9823	26.6143	-0.1153	2.39562
590.074	56.0322	52.596	-0.21582	3.92916		590.045	56.0322	26.6404	-0.11135	2.40062
590.574	56.0821	52.587	-0.20815	3.93495		590.545	56.0821	26.6703	-0.10798	2.40182
591.074	56.1319	52.5785	-0.20714	3.94427		591.045	56.1319	26.6934	-0.10574	2.40235
591.574	56.1817	52.5702	-0.21351	3.95041		591.545	56.1817	26.5901	-0.10506	2.40346
592.074	56.2315	52.5618	-0.22767	3.96132		592.045	56.2315	26.5563	-0.10621	2.4048
592.574	56.2814	52.5528	-0.24939	3.96525		592.545	56.2814	26.7386	-0.10918	2.40954
593.074	56.3313	52.5423	-0.27785	3.97247		593.045	56.3313	26.4499	-0.11366	2.41108
593.574	56.3813	52.5296	-0.31137	3.98205		593.545	56.3813	26.6938	-0.11918	2.41159
594.074	56.4313	52.5141	-0.34758	3.98765		594.045	56.4313	26.6468	-0.12528	2.41562
594.574	56.4812	52.4955	-0.38349	3.99383		594.545	56.4812	26.5677	-0.13134	2.41655
595.074	56.5312	52.4738	-0.41593	4.00841		595.045	56.5312	26.5801	-0.13682	2.4211
595.574	56.581	52.4494	-0.44173	4.00805		595.545	56.581	26.4812	-0.14119	2.42069
596.074	56.6309	52.423	-0.45851	4.01643		596.045	56.6309	26.6253	-0.1441	2.42435
596.574	56.6807	52.3956	-0.46458	4.01903		596.545	56.6807	26.558	-0.14547	2.42698
597.074	56.7306	52.3683	-0.45953	4.02883		597.045	56.7306	26.6753	-0.14543	2.43045
597.574	56.7805	52.3419	-0.44411	4.03376		597.545	56.7805	26.5775	-0.14434	2.43321
598.074	56.8305	52.3176	-0.42027	4.04255		598.045	56.8305	26.5399	-0.14261	2.43183
598.574	56.8804	52.296	-0.39093	4.04074		598.545	56.8804	26.6642	-0.1405	2.43742
599.074	56.9304	52.2773	-0.35948	4.04763		599.045	56.9304	26.5599	-0.13826	2.44001
599.574	56.9803	52.2615	-0.32924	4.05528		599.545	56.9803	26.5137	-0.13613	2.44084
600.074	57.0303	52.2482	-0.30343	4.05716		600.045	57.0303	26.4062	-0.13425	2.44281
600.574	57.0802	52.2367	-0.28441	4.06703		600.545	57.0802	26.6205	-0.1327	2.4484
601.074	57.1302	52.2262	-0.27365	4.07578		601.045	57.1302	26.4202	-0.13141	2.4502
601.574	57.1802	52.216	-0.27165	4.08181		601.545	57.1802	26.5198	-0.13028	2.45058
602.074	57.2302	52.2052	-0.27775	4.08241		602.045	57.2302	26.4899	-0.12895	2.4564
602.574	57.2803	52.193	-0.29046	4.08607		602.545	57.2803	26.5477	-0.12723	2.45603
603.074	57.3304	52.179	-0.30754	4.09493		603.045	57.3304	26.3184	-0.12518	2.46048
603.574	57.3806	52.1631	-0.32658	4.10192		603.545	57.3806	26.5264	-0.12305	2.46221
604.074	57.4307	52.1452	-0.34507	4.10812		604.045	57.4307	26.516	-0.1213	2.46512
604.574	57.4807	52.1259	-0.3608	4.11321		604.545	57.4807	26.3244	-0.12034	2.47077
605.074	57.5308	52.1055	-0.37223	4.11755		605.045	57.5308	26.4457	-0.12036	2.46817
605.574	57.5808	52.0846	-0.37842	4.12458		605.545	57.5808	26.5803	-0.12135	2.47182
606.074	57.6308	52.0636	-0.37927	4.1249		606.045	57.6308	26.5544	-0.12312	2.47747
606.574	57.6807	52.043	-0.37539	4.13042		606.545	57.6807	26.3195	-0.1254	2.47736
607.074	57.7307	52.0233	-0.36803	4.13732		607.045	57.7307	26.4538	-0.1279	2.48062
607.574	57.7807	52.0047	-0.35889	4.14393		607.545	57.7807	26.372	-0.13035	2.48122
608.074	57.8308	51.9874	-0.34977	4.15237		608.045	57.8308	26.3446	-0.13233	2.4836
608.574	57.8807	51.9714	-0.34243	4.15721		608.545	57.8807	26.5282	-0.13344	2.48818
609.074	57.9307	51.9564	-0.33815	4.15422		609.045	57.9307	26.3321	-0.13345	2.48931
609.574	57.9806	51.9415	-0.33757	4.1597		609.545	57.9806	26.6131	-0.13237	2.49029
610.074	58.0305	51.9262	-0.34057	4.16274		610.045	58.0305	26.4701	-0.13059	2.49044
610.574	58.0805	51.91	-0.34638	4.16902		610.545	58.0805	26.3702	-0.12879	2.49628
611.074	58.1305	51.8926	-0.3537	4.17394		611.045	58.1305	26.4379	-0.12769	2.49752
611.574	58.1805	51.8741	-0.36099	4.17824		611.545	58.1805	26.2058	-0.12763	2.49854
612.074	58.2306	51.8548	-0.3669	4.18751		612.045	58.2306	26.407	-0.12871	2.50036
612.574	58.2806	51.835	-0.37039	4.19662		612.545	58.2806	26.4732	-0.13071	2.50075
613.074	58.3305	51.8151	-0.37101	4.20586		613.045	58.3305	26.3676	-0.13333	2.50407
613.574	58.3805	51.7953	-0.36897	4.20775		613.545	58.3805	26.4882	-0.13642	2.503
614.074	58.4305	51.776	-0.36516	4.21918		614.045	58.4305	26.2544	-0.14006	2.50724
614.574	58.4804	51.7575	-0.36093	4.22077		614.545	58.4804	26.3053	-0.14418	2.50725
615.074	58.5304	51.7403	-0.35785	4.22953		615.045	58.5304	26.3267	-0.14859	2.50861
615.574	58.5802	51.7241	-0.35731	4.23204		615.545	58.5802	26.1148	-0.15285	2.50962
616.074	58.6301	51.7087	-0.36018	4.23385		616.045	58.6301	26.3687	-0.15616	2.50972
616.574	58.68	51.693	-0.36647	4.23913		616.545	58.68	26.3169	-0.15782	2.51232
617.074	58.73	51.676	-0.37526	4.24253		617.045	58.73	26.2544	-0.15739	2.51212
617.574	58.7799	51.6571	-0.38494	4.24846		617.545	58.7799	26.4054	-0.15479	2.5139
618.074	58.8298	51.6361	-0.39353	4.24969		618.045	58.8298	26.2821	-0.15026	2.51865
618.574	58.8797	51.6137	-0.39935	4.25524		618.545	58.8797	26.2989	-0.14418	2.51858
619.074	58.9296	51.591	-0.40138	4.26136		619.045	58.9296	26.322	-0.13717	2.52269
619.574	58.9795	51.5691	-0.39953	4.26299		619.545	58.9795	26.2026	-0.12982	2.52727
620.074	59.0295	51.5484	-0.39449	4.26521		620.045	59.0295	26.2706	-0.1229	2.52769
620.574	59.0795	51.529	-0.38746	4.26618		620.545	59.0795	26.2913	-0.11718	2.52933
621.074	59.1295	51.5107	-0.37977	4.2697		621.045	59.1295	26.1822	-0.11338	2.53493
621.574	59.1795	51.4929	-0.37247	4.27244		621.545	59.1795	26.2328	-0.11181	2.53404
622.074	59.2295	51.4752	-0.36611	4.27354		622.045	59.2295	26.1554	-0.11231	2.53524
622.574	59.2796	51.4575	-0.36064	4.27987		622.545	59.2796	26.2271	-0.11415	2.53762
623.074	59.3296	51.4396	-0.3556	4.28083		623.045	59.3296	26.1098	-0.11628	2.54059
623.574	59.3796	51.4216	-0.35026	4.28572		623.545	59.3796	26.2336	-0.11775	2.54181
624.074	59.4296	51.4037	-0.34387	4.28946		624.045	59.4296	26.1742	-0.11798	2.54251
624.574	59.4796	51.3857	-0.33586	4.29163		624.545	59.4796	26.1183	-0.11702	2.54441
625.074	59.5296	51.3681	-0.32608	4.29799		625.045	59.5296	26.1293	-0.1152	2.5474
625.574	59.5797	51.3509	-0.31492	4.30772		625.545	59.5797	26.1918	-0.11304	2.54845
626.074	59.6298	51.3348	-0.30329	4.31192		626.045	59.6298	26.1085	-0.11095	2.54928
626.574	59.6799	51.32	-0.29254	4.31834		626.545	59.6799	26.1673	-0.109	2.55048
627.074	59.73	51.3067	-0.28427	4.32583		627.045	59.73	26.1868	-0.10703	2.55313
627.574	59.7801	51.2947	-0.27985	4.33457		627.545	59.7801	26.2893	-0.10477	2.55346
628.074	59.8301	51.2831	-0.28016	4.33425		628.045	59.8301	26.0486	-0.1022	2.5553
628.574	59.8802	51.2714	-0.28531	4.3399		628.545	59.8802	26.217	-0.099421	2.55391
629.074	59.9302	51.2588	-0.29444	4.34835		629.045	59.9302	26.045	-0.0967507	2.55868
629.574	59.9802	51.2446	-0.30582	4.35033		629.545	59.9802	26.2152	-0.0944861	2.55755
630.074	60.0302	51.2287	-0.31717	4.35746		630.045	60.0302	26.0169	-0.0928993	2.55954
630.574	60.0802	51.2109	-0.3261	4.36241		630.545	60.0802	26.1117	-0.0921153	2.56117
631.074	60.1303	51.1921	-0.33073	4.36819		631.045	60.1303	26.0825	-0.092031	2.56296
631.574	60.1803	51.1725	-0.33023	4.37679		631.545	60.1803	26.0832	-0.092433	2.56454
632.074	60.2304	51.1529	-0.32517	4.38259		632.045	60.2304	26.0365	-0.0930431	2.5659
632.574	60.2804	51.1345	-0.31772	4.38848		632.545	60.2804	26.0658	-0.0935602	2.56762
633.074	60.3304	51.1185	-0.31137	4.39313		633.045	60.3304	26.0861	-0.0936656	2.56514
633.574	60.3804	51.1054	-0.31022	4.39981		633.545	60.3804	26.2693	-0.0932241	2.56931
634.074	60.4304	51.0951	-0.31786	4.40722		634.045	60.4304	26.0622	-0.0921942	2.56967
634.574	60.4804	51.086	-0.33619	4.41312		634.545	60.4804	26.1115	-0.0907875	2.57193
635.074	60.5304	51.0756	-0.36464	4.41396		635.045	60.5304	25.9614	-0.089328	2.57067
635.574	60.5804	51.0609	-0.39993	4.41523		635.545	60.5804	26.1266	-0.0880932	2.57226
636.074	60.6304	51.04	-0.43664	4.42227		636.045	60.6304	26.093	-0.0871487	2.57482
636.574	60.6804	51.0125	-0.46844	4.4271		636.545	60.6804	26.2072	-0.0862816	2.57603
637.074	60.7304	50.9803	-0.48956	4.43324		637.045	60.7304	26.0686	-0.0851581	2.57786
637.574	60.7804	50.9465	-0.49655	4.43473		637.545	60.7804	25.994	-0.0832816	2.57621
638.074	60.8304	50.9144	-0.48883	4.43783		638.045	60.8304	26.0141	-0.0802909	2.58065
638.574	60.8804	50.8865	-0.46874	4.44649		638.545	60.8804	26.104	-0.0762125	2.58226
639.074	60.9304	50.8633	-0.44056	4.45107		639.045	60.9304	26.0252	-0.0714651	2.58599
639.574	60.9804	50.8444	-0.40945	4.45243		639.545	60.9804	26.1164	-0.0667703	2.58522
640.074	61.0304	50.8283	-0.37997	4.45968		640.045	61.0304	26.0277	-0.0628245	2.58588
640.574	61.0803	50.8135	-0.35549	4.46093		640.545	61.0803	26.1344	-0.06027	2.5868
641.074	61.1302	50.799	-0.33752	4.46623		641.045	61.1302	25.8803	-0.0593027	2.58807
641.574	61.1801	50.7844	-0.32622	4.46666		641.545	61.1801	26.019	-0.0597182	2.5912
642.074	61.23	50.7694	-0.32055	4.4704		642.045	61.23	26.0144	-0.0612706	2.59128
642.574	61.2799	50.7539	-0.319	4.47329		642.545	61.2799	26.0426	-0.0635876	2.59488
643.074	61.3299	50.7379	-0.31995	4.47751		643.045	61.3299	26.0806	-0.0664329	2.59597
643.574	61.3798	50.7215	-0.32203	4.47812		643.545	61.3798	26.0525	-0.0695956	2.59708
644.074	61.4298	50.705	-0.32417	4.48361		644.045	61.4298	25.9514	-0.0728281	2.59463
644.574	61.4797	50.6883	-0.32573	4.49176		644.545	61.4797	25.9506	-0.075696	2.59907
645.074	61.5297	50.6715	-0.32646	4.49703		645.045	61.5297	26.0578	-0.0777167	2.6001
645.574	61.5796	50.6548	-0.32644	4.49851		645.545	61.5796	25.9868	-0.0784696	2.59937
646.074	61.6296	50.6383	-0.32597	4.50731		646.045	61.6296	25.97	-0.0779856	2.60337
646.574	61.6796	50.6221	-0.32548	4.50816		646.545	61.6796	26.098	-0.0767016	2.60087
647.074	61.7296	50.6062	-0.32543	4.51396		647.045	61.7296	26.0905	-0.075302	2.60581
647.574	61.7798	50.5904	-0.32612	4.5171		647.545	61.7798	26.0393	-0.0746425	2.6049
648.074	61.83	50.5749	-0.32762	4.52454		648.045	61.83	25.9008	-0.0752774	2.60354
648.574	61.8801	50.559	-0.32975	4.52877		648.545	61.8801	26.0682	-0.0774651	2.60553
649.074	61.9302	50.5426	-0.33208	4.52994		649.045	61.9302	26.0509	-0.0811222	2.60601
649.574	61.9803	50.5256	-0.33406	4.53182		649.545	61.9803	25.9102	-0.0860377	2.60499
650.074	62.0303	50.508	-0.33523	4.53764		650.045	62.0303	26.02	-0.0919131	2.60611
650.574	62.0804	50.4902	-0.33532	4.54167		650.545	62.0804	26.0208	-0.0984106	2.60436
651.074	62.1305	50.4727	-0.33435	4.54679		651.045	62.1305	25.9781	-0.10505	2.59898
651.574	62.1806	50.4558	-0.33257	4.54985		651.545	62.1806	25.8216	-0.1109	2.6019
652.074	62.2307	50.4396	-0.33028	4.5514		652.045	62.2307	25.9081	-0.11493	2.59899
652.574	62.2807	50.4238	-0.32764	4.56018		652.545	62.2807	26.0138	-0.11628	2.5994
653.074	62.3307	50.4079	-0.32459	4.5625		653.045	62.3307	25.9692	-0.11458	2.60071
653.574	62.3807	50.3917	-0.3208	4.5684		653.545	62.3807	25.9899	-0.11024	2.5979
654.074	62.4307	50.375	-0.31582	4.57619		654.045	62.4307	25.9296	-0.10419	2.60016
654.574	62.4807	50.358	-0.30937	4.57958		654.545	62.4807	26.0327	-0.0976028	2.59935
655.074	62.5308	50.3415	-0.3014	4.58003		655.045	62.5308	25.8588	-0.0914189	2.59852
655.574	62.5808	50.3259	-0.29237	4.58418		655.545	62.5808	25.8935	-0.0861107	2.59983
656.074	62.6309	50.3117	-0.28313	4.59359		656.045	62.6309	25.8811	-0.0817206	2.59662
656.574	62.6809	50.2985	-0.27467	4.59546		656.545	62.6809	25.9996	-0.0780808	2.60066
657.074	62.7309	50.286	-0.26791	4.60498		657.045	62.7309	25.8015	-0.0750947	2.59968
657.574	62.7809	50.2738	-0.26358	4.6116		657.545	62.7809	25.8329	-0.0727692	2.59855
658.074	62.831	50.2617	-0.262	4.61522		658.045	62.831	25.8667	-0.071141	2.59854
658.574	62.881	50.2495	-0.26306	4.62122		658.545	62.881	26.0125	-0.0701789	2.59896
659.074	62.9311	50.2373	-0.26617	4.62245		659.045	62.9311	25.6584	-0.0697091	2.60109
659.574	62.9812	50.2245	-0.27033	4.62942		659.545	62.9812	25.8221	-0.0694779	2.59866
660.074	63.0313	50.2109	-0.27434	4.63063		660.045	63.0313	25.8516	-0.0693751	2.60156
660.574	63.0813	50.1962	-0.27695	4.63735		660.545	63.0813	25.9382	-0.0694212	2.59983
661.074	63.1314	50.1806	-0.27726	4.63775		661.045	63.1314	25.9151	-0.0699444	2.59982
661.574	63.1814	50.1648	-0.27493	4.64863		661.545	63.1814	25.8468	-0.0711165	2.60198
662.074	63.2315	50.1496	-0.2704	4.65271		662.045	63.2315	25.9908	-0.0730193	2.60058
662.574	63.2816	50.1356	-0.26488	4.65321		662.545	63.2816	25.8691	-0.0754013	2.60085
663.074	63.3316	50.1232	-0.26012	4.65884		663.045	63.3316	25.8821	-0.0778143	2.60046
663.574	63.3816	50.112	-0.25807	4.66659		663.545	63.3816	25.7993	-0.0798227	2.60001
664.074	63.4316	50.1015	-0.26044	4.66812		664.045	63.4316	25.9221	-0.081187	2.5956
664.574	63.4816	50.0909	-0.26831	4.67402		664.545	63.4816	25.8537	-0.0818975	2.59803
665.074	63.5316	50.0795	-0.28206	4.68695		665.045	63.5316	26.0002	-0.0819542	2.59242
665.574	63.5816	50.0668	-0.30111	4.69256		665.545	63.5816	25.8294	-0.0814724	2.59577
666.074	63.6316	50.0524	-0.32407	4.69216		666.045	63.6316	25.9116	-0.0803185	2.59342
666.574	63.6816	50.0361	-0.34912	4.69589		666.545	63.6816	25.8511	-0.0784027	2.59274
667.074	63.7316	50.0179	-0.37362	4.70106		667.045	63.7316	25.9376	-0.0756474	2.59432
667.574	63.7816	49.9975	-0.39503	4.70597		667.545	63.7816	25.7462	-0.0722959	2.59253
668.074	63.8316	49.9751	-0.41064	4.71072		668.045	63.8316	25.921	-0.0688866	2.59101
668.574	63.8815	49.9512	-0.4182	4.71139		668.545	63.8815	25.7429	-0.0660263	2.59124
669.074	63.9314	49.9264	-0.41609	4.72156		669.045	63.9314	25.8844	-0.0642537	2.59108
669.574	63.9813	49.9017	-0.40378	4.72689		669.545	63.9813	25.697	-0.0636292	2.58933
670.074	64.0312	49.8783	-0.38185	4.72704		670.045	64.0312	25.7698	-0.0638322	2.58766
670.574	64.0812	49.8571	-0.35212	4.73112		670.545	64.0812	25.7625	-0.0639826	2.58999
671.074	64.1312	49.8389	-0.31738	4.72642		671.045	64.1312	25.7066	-0.0631729	2.58551
671.574	64.1811	49.8242	-0.28116	4.73635		671.545	64.1811	25.8498	-0.0608544	2.58678
672.074	64.2311	49.8128	-0.24725	4.73957		672.045	64.2311	25.7695	-0.0566457	2.58316
672.574	64.2811	49.8042	-0.21901	4.74524		672.545	64.2811	25.7511	-0.0505028	2.58557
673.074	64.3311	49.7976	-0.19911	4.74734		673.045	64.3311	25.8549	-0.0429078	2.58418
673.574	64.3811	49.7921	-0.18902	4.75046		673.545	64.3811	25.9733	-0.0343345	2.58539
674.074	64.4311	49.7865	-0.18903	4.75191		674.045	64.4311	25.6482	-0.0250092	2.58131
674.574	64.4811	49.78	-0.1982	4.75725		674.545	64.4811	25.7629	-0.0153155	2.58136
675.074	64.5312	49.7718	-0.21461	4.76379		675.045	64.5312	25.8889	-0.00611964	2.58052
675.574	64.5811	49.7614	-0.23574	4.76554		675.545	64.5811	25.7769	0.00117759	2.58001
676.074	64.6312	49.7485	-0.25896	4.77		676.045	64.6312	25.8198	0.00453515	2.57641
676.574	64.6811	49.7335	-0.28206	4.77037		676.545	64.6811	25.6534	0.00208196	2.5762
677.074	64.7311	49.717	-0.30343	4.77825		677.045	64.7311	25.9771	-0.00726703	2.57601
677.574	64.781	49.6996	-0.32237	4.78231		677.545	64.781	25.6901	-0.022951	2.57518
678.074	64.831	49.682	-0.33895	4.78489		678.045	64.831	25.7687	-0.0427845	2.5729
678.574	64.8809	49.6645	-0.35383	4.78869		678.545	64.8809	25.8795	-0.0633433	2.57052
679.074	64.9309	49.6472	-0.36774	4.78804		679.045	64.9309	25.7817	-0.0813207	2.56853
679.574	64.9809	49.6295	-0.38108	4.79283		679.545	64.9809	25.9141	-0.0942237	2.56726
680.074	65.0308	49.611	-0.39358	4.79389		680.045	65.0308	25.6617	-0.1011	2.56718
680.574	65.0808	49.591	-0.4043	4.79916		680.545	65.0808	25.7807	-0.10268	2.56488
681.074	65.1308	49.5695	-0.41161	4.79891		681.045	65.1308	25.7272	-0.10043	2.56542
681.574	65.1808	49.5464	-0.41379	4.80314		681.545	65.1808	25.9049	-0.0962856	2.56169
682.074	65.2308	49.5226	-0.40946	4.80889		682.045	65.2308	25.7662	-0.0919143	2.55997
682.574	65.2809	49.4989	-0.39798	4.81211		682.545	65.2809	25.8149	-0.08834	2.56101
683.074	65.3311	49.4765	-0.37978	4.81459		683.045	65.3311	26.154	-0.0860397	2.5566
683.574	65.3812	49.4562	-0.35622	4.81073		683.545	65.3812	25.9734	-0.0852256	2.55648
684.074	65.4313	49.4385	-0.32968	4.81911		684.045	65.4313	25.6339	-0.0858299	2.55692
684.574	65.4813	49.4235	-0.30313	4.82346		684.545	65.4813	25.4254	-0.0877712	2.55499
685.074	65.5313	49.4106	-0.27963	4.82942		685.045	65.5313	25.7546	-0.0907187	2.55545
685.574	65.5812	49.3997	-0.26197	4.83193		685.545	65.5812	25.6262	-0.0945698	2.55296
686.074	65.6311	49.3899	-0.25236	4.83374		686.045	65.6311	25.7293	-0.0995706	2.55386
686.574	65.6811	49.3808	-0.25206	4.83683		686.545	65.6811	25.5767	-0.10598	2.54833
687.074	65.731	49.3717	-0.26127	4.83467		687.045	65.731	25.707	-0.11352	2.54767
687.574	65.781	49.3617	-0.27912	4.84221		687.545	65.781	25.627	-0.12122	2.54844
688.074	65.831	49.3498	-0.30351	4.84618		688.045	65.831	25.6771	-0.12737	2.54676
688.574	65.881	49.335	-0.33162	4.85076		688.545	65.881	25.7365	-0.12982	2.54762
689.074	65.9312	49.3169	-0.36019	4.85613		689.045	65.9312	25.5631	-0.12684	2.54593
689.574	65.9813	49.2959	-0.38585	4.8592		689.545	65.9813	25.7887	-0.11787	2.5452
690.074	66.0315	49.2727	-0.40601	4.86023		690.045	66.0315	25.7033	-0.10409	2.5407
690.574	66.0817	49.2483	-0.41918	4.86425		690.545	66.0817	25.7334	-0.0881472	2.53722
691.074	66.1319	49.224	-0.42502	4.86946		691.045	66.1319	25.6378	-0.0733347	2.53735
691.574	66.182	49.2005	-0.42442	4.87119		691.545	66.182	25.6538	-0.0622691	2.53468
692.074	66.2321	49.1786	-0.41915	4.87861		692.045	66.2321	25.8106	-0.0562123	2.53309
692.574	66.282	49.1582	-0.41129	4.88334		692.545	66.282	25.7343	-0.0546815	2.53225
693.074	66.332	49.139	-0.4028	4.89335		693.045	66.332	25.604	-0.0561149	2.53208
693.574	66.3819	49.1206	-0.39504	4.89312		693.545	66.3819	25.6745	-0.0586372	2.52838
694.074	66.4319	49.1022	-0.38873	4.89121		694.045	66.4319	25.5956	-0.0605766	2.52647
694.574	66.4819	49.0836	-0.38387	4.89542		694.545	66.4819	25.6315	-0.0613438	2.52566
695.074	66.5319	49.0644	-0.38004	4.89957		695.045	66.5319	25.5468	-0.0612135	2.52492
695.574	66.582	49.0448	-0.37665	4.90336		695.545	66.582	25.7842	-0.0605991	2.52343
696.074	66.632	49.0253	-0.37321	4.91323		696.045	66.632	25.5367	-0.0599407	2.5237
696.574	66.682	49.0064	-0.36943	4.91175		696.545	66.682	25.6845	-0.0593768	2.52696
697.074	66.732	48.9881	-0.36531	4.91609		697.045	66.732	25.4327	-0.0586122	2.52657
697.574	66.782	48.9703	-0.36094	4.91916		697.545	66.782	25.7333	-0.0569978	2.52485
698.074	66.832	48.9527	-0.35645	4.92387		698.045	66.832	25.5817	-0.0539773	2.52369
698.574	66.8819	48.9351	-0.35188	4.92892		698.545	66.8819	25.7422	-0.0492195	2.52333
699.074	66.9318	48.9174	-0.34727	4.92343		699.045	66.9318	25.4684	-0.0429732	2.52221
699.574	66.9816	48.8997	-0.34257	4.9239		699.545	66.9816	25.5317	-0.0360153	2.52233
700.074	67.0314	48.8824	-0.33778	4.92924		700.045	67.0314	25.5364	-0.0293557	2.52165
700.574	67.0812	48.8656	-0.33298	4.93295		700.545	67.0812	25.5872	-0.0241523	2.52196
701.074	67.1312	48.8494	-0.32815	4.93919		701.045	67.1312	25.7247	-0.0212636	2.52189
701.574	67.1812	48.8335	-0.32324	4.94211		701.545	67.1812	25.6879	-0.021238	2.52323
702.074	67.2312	48.8177	-0.31808	4.94419		702.045	67.2312	25.7198	-0.0239027	2.52113
702.574	67.2811	48.8017	-0.31239	4.94947		702.545	67.2811	25.5537	-0.0286125	2.52166
703.074	67.3311	48.7856	-0.30602	4.95018		703.045	67.3311	25.648	-0.0342445	2.5213
703.574	67.3811	48.7695	-0.29902	4.95124		703.545	67.3811	25.6983	-0.0396702	2.51997
704.074	67.431	48.7541	-0.2918	4.95463		704.045	67.431	25.5441	-0.0441128	2.5204
704.574	67.481	48.7396	-0.28514	4.95228		704.545	67.481	25.722	-0.0473117	2.51944
705.074	67.531	48.7263	-0.27998	4.96453		705.045	67.531	25.5894	-0.0496907	2.51848
705.574	67.581	48.7139	-0.27722	4.96189		705.545	67.581	25.596	-0.0518854	2.51705
706.074	67.6309	48.7018	-0.27741	4.96788		706.045	67.6309	25.5948	-0.0545824	2.51717
706.574	67.6809	48.6894	-0.28061	4.97239		706.545	67.6809	25.752	-0.0581366	2.51823
707.074	67.7309	48.6762	-0.28638	4.97593		707.045	67.7309	25.5493	-0.0624762	2.5182
707.574	67.7809	48.6618	-0.29395	4.98063		707.545	67.7809	25.682	-0.0670338	2.51855
708.074	67.8309	48.6465	-0.30237	4.98236		708.045	67.8309	25.5879	-0.0711951	2.51758
708.574	67.8809	48.6304	-0.31092	4.99125		708.545	67.8809	25.7097	-0.0743371	2.51583
709.074	67.931	48.6139	-0.31918	4.9949		709.045	67.931	25.4062	-0.0758309	2.51745
709.574	67.981	48.5975	-0.32712	5.0046		709.545	67.981	25.6474	-0.0754084	2.51578
710.074	68.0311	48.5809	-0.33507	5.00846		710.045	68.0311	25.5953	-0.0730743	2.51585
710.574	68.0812	48.5645	-0.34335	5.01069		710.545	68.0812	25.4612	-0.0690598	2.51303
711.074	68.1312	48.5479	-0.35222	5.0211		711.045	68.1312	25.5354	-0.0637198	2.51351
711.574	68.1813	48.5308	-0.36159	5.02267		711.545	68.1813	25.5175	-0.0572711	2.50961
712.074	68.2313	48.5129	-0.37084	5.02696		712.045	68.2313	25.7723	-0.0499855	2.51427
712.574	68.2812	48.494	-0.37895	5.03312		712.545	68.2812	25.4704	-0.041934	2.51311
713.074	68.3312	48.474	-0.38458	5.04139		713.045	68.3312	25.5501	-0.0331119	2.5147
713.574	68.3812	48.4532	-0.38639	5.05262		713.545	68.3812	25.4086	-0.0236288	2.51496
714.074	68.4312	48.4317	-0.38325	5.05401		714.045	68.4312	25.634	-0.0138339	2.51521
714.574	68.4811	48.4103	-0.37454	5.06112		714.545	68.4811	25.4722	-0.00434701	2.51685
715.074	68.5312	48.3895	-0.36029	5.0653		715.045	68.5312	25.5858	0.00399207	2.51819
715.574	68.5813	48.3702	-0.3413	5.06931		715.545	68.5813	25.4398	0.0103486	2.51704
716.074	68.6314	48.3529	-0.31899	5.07638		716.045	68.6314	25.5367	0.0140079	2.5112
716.574	68.6815	48.3377	-0.29501	5.08035		716.545	68.6815	25.3503	0.0146889	2.51127
717.074	68.7317	48.3244	-0.27098	5.08137		717.045	68.7317	25.5303	0.0124745	2.51033
717.574	68.7817	48.3128	-0.24854	5.08127		717.545	68.7817	25.6612	0.0077785	2.51289
718.074	68.8317	48.3021	-0.22879	5.08896		718.045	68.8317	25.5228	0.00133378	2.51433
718.574	68.8816	48.2922	-0.21267	5.09274		718.545	68.8816	25.5931	-0.00590603	2.51366
719.074	68.9315	48.2828	-0.20095	5.09219		719.045	68.9315	25.45	-0.0130129	2.51185
719.574	68.9814	48.274	-0.19418	5.0927		719.545	68.9814	25.682	-0.0192776	2.50891
720.074	69.0313	48.2659	-0.19284	5.09676		720.045	69.0313	25.4298	-0.0242704	2.50826
720.574	69.0812	48.2581	-0.19723	5.09941		720.545	69.0812	25.6433	-0.0280682	2.50841
721.074	69.1311	48.2502	-0.2073	5.09425		721.045	69.1311	25.5113	-0.0312871	2.51123
721.574	69.1811	48.2417	-0.22252	5.0933		721.545	69.1811	25.7543	-0.0347918	2.50794
722.074	69.2311	48.2317	-0.24171	5.09487		722.045	69.2311	25.482	-0.0392896	2.50798
722.574	69.2811	48.22	-0.26308	5.10274		722.545	69.2811	25.6947	-0.0453201	2.50843
723.074	69.3311	48.2061	-0.28426	5.10268		723.045	69.3311	25.5535	-0.0529832	2.50768
723.574	69.3811	48.1899	-0.30278	5.10542		723.545	69.3811	25.6714	-0.0620246	2.51032
724.074	69.4311	48.1717	-0.31651	5.11686		724.045	69.4311	25.4162	-0.0719986	2.51183
724.574	69.4811	48.1523	-0.32398	5.12015		724.545	69.4811	25.4569	-0.0825347	2.51081
725.074	69.5311	48.1327	-0.32482	5.12964		725.045	69.5311	25.5897	-0.0933192	2.51025
725.574	69.5811	48.114	-0.31989	5.13769		725.545	69.5811	25.4545	-0.10386	2.50968
726.074	69.6311	48.0971	-0.31104	5.14254		726.045	69.6311	25.4732	-0.11368	2.51114
726.574	69.6811	48.0821	-0.30074	5.14574		726.545	69.6811	25.5096	-0.12218	2.51349
727.074	69.731	48.069	-0.29155	5.1513		727.045	69.731	25.3692	-0.12858	2.50928
727.574	69.781	48.0569	-0.28575	5.16208		727.545	69.781	25.6133	-0.13246	2.51026
728.074	69.831	48.0453	-0.28491	5.16102		728.045	69.831	25.4754	-0.13361	2.50935
728.574	69.8809	48.0333	-0.28961	5.16689		728.545	69.8809	25.4626	-0.13214	2.50992
729.074	69.9309	48.0204	-0.29951	5.17423		729.045	69.9309	25.3089	-0.1283	2.5054
729.574	69.9809	48.0062	-0.31339	5.18012		729.545	69.9809	25.5915	-0.12234	2.50658
730.074	70.031	47.9904	-0.32957	5.18668		730.045	70.031	25.5357	-0.11467	2.50533
730.574	70.0811	47.9731	-0.34608	5.18752		730.545	70.0811	25.4807	-0.10567	2.50966
731.074	70.1312	47.9545	-0.36098	5.1998		731.045	70.1312	25.3573	-0.0957229	2.5081
731.574	70.1813	47.9346	-0.37243	5.20273		731.545	70.1813	25.4518	-0.085402	2.51095
732.074	70.2313	47.914	-0.37889	5.20424		732.045	70.2313	25.5266	-0.0753804	2.51148
732.574	70.2813	47.8929	-0.37921	5.20776		732.545	70.2813	25.2089	-0.0662714	2.51178
733.074	70.3313	47.8718	-0.37278	5.21573		733.045	70.3313	25.4256	-0.0586746	2.51706
733.574	70.3812	47.8509	-0.35956	5.22149		733.545	70.3812	25.3764	-0.0528176	2.51889
734.074	70.4311	47.831	-0.34017	5.22128		734.045	70.4311	25.5353	-0.0486589	2.5222
734.574	70.4811	47.8128	-0.3158	5.2327		734.545	70.4811	25.3051	-0.045902	2.52132
735.074	70.5311	47.7968	-0.2882	5.2369		735.045	70.5311	25.5011	-0.0440122	2.52263
735.574	70.5811	47.7833	-0.25932	5.24473		735.545	70.5811	25.3705	-0.0425875	2.52542
736.074	70.6311	47.7722	-0.23108	5.24953		736.045	70.6311	25.4814	-0.0412431	2.52839
736.574	70.681	47.7631	-0.20522	5.25289		736.545	70.681	25.3263	-0.0396972	2.52879
737.074	70.731	47.7552	-0.18296	5.25877		737.045	70.731	25.3149	-0.0378386	2.52994
737.574	70.781	47.748	-0.16496	5.26045		737.545	70.781	25.5049	-0.0356973	2.533
738.074	70.831	47.7411	-0.1516	5.26411		738.045	70.831	25.2697	-0.0335437	2.53493
738.574	70.881	47.7347	-0.14288	5.27493		738.545	70.881	25.4179	-0.0316714	2.53697
739.074	70.931	47.7287	-0.13874	5.27406		739.045	70.931	25.4289	-0.0305495	2.53937
739.574	70.9811	47.7231	-0.13907	5.27552		739.545	70.9811	25.5617	-0.030423	2.54082
740.074	71.0312	47.7176	-0.14356	5.27961		740.045	71.0312	25.4468	-0.0312565	2.54595
740.574	71.0813	47.7118	-0.15165	5.28576		740.545	71.0813	25.3906	-0.0326071	2.5489
741.074	71.1313	47.7052	-0.16238	5.29022		741.045	71.1313	25.3827	-0.0337662	2.54888
741.574	71.1813	47.6972	-0.17449	5.2973		741.545	71.1813	25.4318	-0.0341168	2.55288
742.074	71.2313	47.6878	-0.18647	5.30136		742.045	71.2313	25.4569	-0.0333375	2.5519
742.574	71.2812	47.677	-0.19686	5.30773		742.545	71.2812	25.409	-0.031668	2.55616
743.074	71.331	47.6653	-0.20448	5.31496		743.045	71.331	25.4222	-0.0299409	2.55752
743.574	71.3809	47.6532	-0.20858	5.31859		743.545	71.3809	25.439	-0.0291814	2.5635
744.074	71.4307	47.6413	-0.20896	5.3217		744.045	71.4307	25.3823	-0.0302456	2.56478
744.574	71.4806	47.6299	-0.20597	5.32795		744.545	71.4806	25.3647	-0.0336274	2.57234
745.074	71.5305	47.6191	-0.20039	5.33468		745.045	71.5305	25.3339	-0.0392056	2.57557
745.574	71.5804	47.6091	-0.19337	5.33519		745.545	71.5804	25.417	-0.0463418	2.58001
746.074	71.6303	47.5997	-0.18621	5.339		746.045	71.6303	25.5311	-0.0541322	2.58075
746.574	71.6803	47.591	-0.1803	5.34655		746.545	71.6803	25.34	-0.0614806	2.5863
747.074	71.7303	47.5828	-0.17697	5.35025		747.045	71.7303	25.255	-0.0674789	2.58673
747.574	71.7802	47.5753	-0.17735	5.3544		747.545	71.7802	25.2859	-0.0713501	2.58857
748.074	71.8303	47.5683	-0.18214	5.35722		748.045	71.8303	25.4406	-0.0728922	2.58777
748.574	71.8802	47.5613	-0.19139	5.3625		748.545	71.8802	25.4684	-0.0725315	2.5911
749.074	71.9301	47.5536	-0.20434	5.36553		749.045	71.9301	25.2597	-0.0710267	2.59505
749.574	71.98	47.5442	-0.21943	5.37279		749.545	71.98	25.3426	-0.0695453	2.59633
750.074	72.0298	47.5327	-0.23437	5.37931		750.045	72.0298	25.3556	-0.0690447	2.59787
750.574	72.0797	47.5189	-0.24678	5.38753		750.545	72.0797	25.5382	-0.0700109	2.59807
751.074	72.1296	47.5033	-0.25445	5.3922		751.045	72.1296	25.425	-0.0722907	2.6036
751.574	72.1796	47.4871	-0.25593	5.40321		751.545	72.1796	25.3143	-0.0751372	2.60263
752.074	72.2296	47.4714	-0.25079	5.40342		752.045	72.2296	25.353	-0.0777138	2.6045
752.574	72.2797	47.4571	-0.23972	5.41354		752.545	72.2797	25.3738	-0.0794848	2.60961
753.074	72.3297	47.4446	-0.22429	5.4165		753.045	72.3297	25.3849	-0.0804448	2.61416
753.574	72.3798	47.4338	-0.20669	5.42405		753.545	72.3798	25.3637	-0.0812059	2.61534
754.074	72.4299	47.4246	-0.18948	5.43275		754.045	72.4299	25.2985	-0.082564	2.61638
754.574	72.4798	47.4167	-0.17522	5.44088		754.545	72.4798	25.3082	-0.0851132	2.61806
755.074	72.5298	47.4099	-0.16633	5.45038		755.045	72.5298	25.2385	-0.0888013	2.61827
755.574	72.5799	47.4041	-0.16492	5.4558		755.545	72.5799	25.2808	-0.0929706	2.61923
756.074	72.6299	47.3991	-0.17247	5.46461		756.045	72.6299	25.2589	-0.0964467	2.62309
756.574	72.68	47.394	-0.18956	5.46937		756.545	72.68	25.3909	-0.0979475	2.6235
757.074	72.7301	47.3879	-0.21567	5.47671		757.045	72.7301	25.2751	-0.0966474	2.62611
757.574	72.7802	47.3795	-0.24912	5.47744		757.545	72.7802	25.2951	-0.0923755	2.6298
758.074	72.8303	47.3678	-0.28651	5.48479		758.045	72.8303	25.183	-0.0856256	2.6335
758.574	72.8804	47.3522	-0.32412	5.48826		758.545	72.8804	25.2899	-0.0774699	2.63332
759.074	72.9304	47.3326	-0.35759	5.49497		759.045	72.9304	25.328	-0.0692328	2.63568
759.574	72.9805	47.3098	-0.38285	5.50263		759.545	72.9805	25.3066	-0.0620921	2.63789
760.074	73.0306	47.2849	-0.39702	5.50362		760.045	73.0306	25.2798	-0.0568212	2.6369
760.574	73.0807	47.2595	-0.39843	5.5097		760.545	73.0807	25.2118	-0.0534873	2.63996
761.074	73.1307	47.235	-0.38721	5.51729		761.045	73.1307	25.3814	-0.0515551	2.64571
761.574	73.1808	47.2127	-0.36494	5.52575		761.545	73.1808	25.24	-0.0501824	2.64995
762.074	73.2308	47.1934	-0.33438	5.53212		762.045	73.2308	25.3286	-0.0484464	2.65365
762.574	73.2809	47.1773	-0.29886	5.54554		762.545	73.2809	25.0922	-0.0457711	2.65427
763.074	73.331	47.1641	-0.26192	5.54929		763.045	73.331	25.2905	-0.0421838	2.65535
763.574	73.3811	47.1536	-0.22679	5.56334		763.545	73.3811	25.1389	-0.0381657	2.66193
764.074	73.4312	47.1452	-0.19602	5.56583		764.045	73.4312	25.3455	-0.0345521	2.65969
764.574	73.4813	47.1383	-0.17138	5.57814		764.545	73.4813	25.1438	-0.032096	2.66557
765.074	73.5312	47.1326	-0.15411	5.58594		765.045	73.5312	25.2413	-0.0312304	2.66693
765.574	73.5812	47.1278	-0.14458	5.59776		765.545	73.5812	25.1886	-0.0318944	2.66875
766.074	73.631	47.1233	-0.14252	5.60507		766.045	73.631	25.4038	-0.0337367	2.67186
766.574	73.6809	47.1183	-0.14694	5.61345		766.545	73.6809	25.1466	-0.0362312	2.67442
767.074	73.7308	47.1125	-0.15632	5.61834		767.045	73.7308	25.3444	-0.0389942	2.67611
767.574	73.7807	47.1051	-0.1686	5.62479		767.545	73.7807	25.0798	-0.0419801	2.67712
768.074	73.8307	47.0959	-0.18171	5.62893		768.045	73.8307	25.368	-0.0453482	2.6838
768.574	73.8807	47.0852	-0.19351	5.63572		768.545	73.8807	25.2369	-0.049507	2.68357
769.074	73.9306	47.0733	-0.20238	5.63852		769.045	73.9306	25.2816	-0.0546859	2.68424
769.574	73.9806	47.0609	-0.20738	5.64939		769.545	73.9806	25.1467	-0.0608857	2.68576
770.074	74.0305	47.0487	-0.20833	5.65375		770.045	74.0305	25.2644	-0.0677997	2.68868
770.574	74.0804	47.0371	-0.20579	5.65921		770.545	74.0804	25.2911	-0.075034	2.69047
771.074	74.1303	47.0265	-0.20087	5.66933		771.045	74.1303	25.1684	-0.0820783	2.69012
771.574	74.1803	47.0169	-0.19493	5.67695		771.545	74.1803	25.2134	-0.0885248	2.69314
772.074	74.2302	47.008	-0.18932	5.68663		772.045	74.2302	25.3636	-0.0941308	2.69109
772.574	74.2802	46.9997	-0.18513	5.69035		772.545	74.2802	25.1819	-0.0985473	2.69341
773.074	74.3303	46.9916	-0.18313	5.6925		773.045	74.3303	25.2849	-0.10169	2.69482
773.574	74.3804	46.9834	-0.1836	5.70237		773.545	74.3804	25.2913	-0.10341	2.69848
774.074	74.4305	46.975	-0.18647	5.70626		774.045	74.4305	25.2665	-0.10359	2.70024
774.574	74.4806	46.9661	-0.19129	5.7126		774.545	74.4806	25.2334	-0.10217	2.70076
775.074	74.5307	46.9568	-0.19742	5.71928		775.045	74.5307	25.0849	-0.0991317	2.69963
775.574	74.5807	46.9467	-0.20412	5.72546		775.545	74.5807	25.1167	-0.0946422	2.70487
776.074	74.6307	46.9359	-0.21064	5.74026		776.045	74.6307	25.0595	-0.0889044	2.71022
776.574	74.6807	46.9246	-0.21636	5.74692		776.545	74.6807	25.1973	-0.0821838	2.7103
777.074	74.7307	46.913	-0.22082	5.75562		777.045	74.7307	25.0767	-0.0748981	2.71199
777.574	74.7807	46.9014	-0.22377	5.76843		777.545	74.7807	25.2325	-0.067538	2.71666
778.074	74.8308	46.8897	-0.22512	5.7755		778.045	74.8308	25.1503	-0.0605957	2.71692
778.574	74.8809	46.8781	-0.22485	5.79025		778.545	74.8809	25.1786	-0.0543631	2.71742
779.074	74.9311	46.8667	-0.22299	5.7968		779.045	74.9311	24.9616	-0.0488829	2.72075
779.574	74.9812	46.8552	-0.21956	5.80087		779.545	74.9812	25.1333	-0.043894	2.72198
780.074	75.0314	46.8439	-0.21459	5.81659		780.045	75.0314	25.0363	-0.0389769	2.72858
780.574	75.0815	46.8329	-0.20816	5.81861		780.545	75.0815	25.2338	-0.0335014	2.72755
781.074	75.1316	46.8222	-0.20044	5.82611		781.045	75.1316	25.0844	-0.0271155	2.73248
781.574	75.1816	46.8119	-0.19175	5.83165		781.545	75.1816	25.0687	-0.0196768	2.73737
782.074	75.2316	46.8023	-0.18269	5.8404		782.045	75.2316	25.1167	-0.0114331	2.73636
782.574	75.2816	46.7933	-0.17401	5.84863		782.545	75.2816	25.0951	-0.0030383	2.73772
783.074	75.3315	46.7852	-0.16657	5.85501		783.045	75.3315	25.1662	0.00471793	2.74189
783.574	75.3815	46.778	-0.16122	5.86736		783.545	75.3815	25.1303	0.0109487	2.74542
784.074	75.4315	46.7714	-0.15862	5.87261		784.045	75.4315	25.1161	0.0149493	2.74694
784.574	75.4815	46.765	-0.15911	5.88774		784.545	75.4815	25.0727	0.0161963	2.74597
785.074	75.5315	46.7584	-0.16261	5.89261		785.045	75.5315	25.2473	0.0146077	2.74918
785.574	75.5816	46.751	-0.16867	5.89728		785.545	75.5816	25.1909	0.0104554	2.75354
786.074	75.6316	46.7426	-0.17655	5.9052		786.045	75.6316	25.1677	0.00417911	2.75257
786.574	75.6817	46.7332	-0.18548	5.91501		786.545	75.6817	25.1537	-0.0034976	2.75163
787.074	75.7317	46.723	-0.19493	5.92679		787.045	75.7317	25.1398	-0.0118749	2.75394
787.574	75.7816	46.7125	-0.20459	5.923		787.545	75.7816	25.079	-0.0202698	2.75645
788.074	75.8316	46.7021	-0.21446	5.92291		788.045	75.8316	25.0392	-0.0281718	2.75751
788.574	75.8815	46.6915	-0.2247	5.93025		788.545	75.8815	25.2245	-0.0354085	2.7587
789.074	75.9315	46.6808	-0.23539	5.94102		789.045	75.9315	25.0204	-0.0418176	2.76155
789.574	75.9814	46.6696	-0.24612	5.93647		789.545	75.9814	25.2781	-0.0474086	2.76216
790.074	76.0313	46.6575	-0.25617	5.942		790.045	76.0313	25.175	-0.0522915	2.76383
790.574	76.0812	46.6439	-0.26432	5.9549		790.545	76.0812	25.2391	-0.0565997	2.76745
791.074	76.1312	46.629	-0.26912	5.96303		791.045	76.1312	25.1369	-0.060434	2.76993
791.574	76.1812	46.6132	-0.26942	5.96989		791.545	76.1812	25.2135	-0.0642455	2.77172
792.074	76.2312	46.5971	-0.26451	5.97678		792.045	76.2312	25.0796	-0.0684146	2.77518
792.574	76.2811	46.5817	-0.2545	5.98848		792.545	76.2811	25.1124	-0.0734317	2.77538
793.074	76.331	46.5677	-0.24034	5.9975		793.045	76.331	25.0924	-0.0794645	2.77689
793.574	76.3808	46.5556	-0.22364	6.00784		793.545	76.3808	25.1278	-0.0859371	2.78269
794.074	76.4307	46.5454	-0.20652	6.00943		794.045	76.4307	24.9509	-0.0925108	2.78311
794.574	76.4805	46.5369	-0.19121	6.01655		794.545	76.4805	25.1153	-0.10121	2.78235
795.074	76.5305	46.5295	-0.17913	6.02017		795.045	76.5305	24.9485	-0.10968	2.78236
795.574	76.5805	46.5225	-0.17057	6.02577		795.545	76.5805	25.2269	-0.12242	2.78684
796.074	76.6304	46.5162	-0.16531	6.0369		796.045	76.6304	25.048	-0.14532	2.79034
796.574	76.6804	46.5098	-0.1637	6.04226		796.545	76.6804	25.169	-0.1851	2.78791
797.074	76.7302	46.5021	-0.16774	6.05073		797.045	76.7302	24.9591	-0.24732	2.79039
797.574	76.7802	46.4955	-0.18148	6.051		797.545	76.7802	25.1552	-0.33909	2.79013
798.074	76.8302	46.4866	-0.21694	6.05475		798.045	76.8302	25.1062	-0.51856	2.79189
798.574	76.8802	46.4724	-0.34604	6.06119		798.545	76.8802	25.264	-0.87306	2.79128
799.074	76.9303	46.4652	0	6.07007		799.045	76.9303	24.9778	0	2.79366

## Sheet: 5. macro-TG
The tables contain data about macro thermogravimetric analysis. Macro TG experiments were performed for peat waste at 6 temperatures. Peat waste was heated at 200, 220, 240, 260, 280, and 300 °C by 60 min. For each temperature, three repetitions were done. The samples mass was around 3 g.
Time, s	macro-TG, %
	200 °C (1)	200 °C (2)	200 °C (3)	220 °C (1)	220 °C (2)	220 °C (3)	240 °C (1)	240 °C (2)	240 °C (3)	260 °C (1)	260 °C (2)	260 °C (3)	280 °C (1)	280 °C (2)	280 °C (3)	300 °C (1)	300 °C (2)	300 °C (3)
1	1	1	1	1	1	1	1	1	1	1	1	1	1	1	1	1	1	1
2	1	1	1	1	1	1	1	1	1	1	1	1	1	1	1	1	1	1
3	1	1	1	1	1	1	1	1	1	1	1	1	1	1	1	0.999667	1	1
4	1	1	1	1	1	1	1	1	1	1	1	1	1	1	1	0.999667	1	1
5	1	1	1	1	1	1	1	1	1	1	1	1	1	1	1	0.999667	1	1
6	1	1	1	1	1	1	1	1	1	1	1	1	1	1	1	0.999667	1	1
7	1	1	1	1	1	1	1	1	1	1	1	1	1	1	1	0.999667	1	1
8	1	1	1	1	1	1	1	1	1	1	1	1	1	1	1	0.999667	1	1
9	1	1	1	1	1	1	1	1	1	1	1	1	1	1	1	0.999667	1	1
10	1	1	1	1	1	1	1	1	1	1	1	1	1	1	1	0.999667	1	1
11	1	1	1	1	1	1	1	1	1	1	1	1	1	1	1	0.999667	1	1
12	1	1	1	1	1	1	1	1	1	1	1	1	1	1	1	0.999667	1	1
13	1	1	1	1	1	1	1	1	1	1	1	1	1	1	1	0.999667	1	1
14	1	1	1	1	1	1	1	1	1	1	1	1	1	1	1	0.999667	1	1
15	1	1	1	1	1	1	1	1	1	1	1	1	1	1	1	0.999667	1	1
16	1	1	1	1	1	1	1	1	1	1	1	1	1	1	1	0.999667	1	1
17	1	1	1	1	1	1	1	1	1	1	1	1	1	1	1	0.999667	1	1
18	1	1	1	1	1	1	1	1	1	1	1	1	1	1	1	0.999667	1	1
19	1	1	1	1	1	1	1	1	1	1	1	1	1	1	1	0.999667	1	1
20	1	1	1	1	1	1	1	1	1	1	1	1	1	1	1	0.999667	1	1
21	1	1	1	1	1	1	1	1	1	1	1	1	1	1	1	0.999667	1	1
22	1	1	1	1	1	1	1	1	1	1	1	1	1	1	1	0.999667	1	1
23	1	1	1	1	1	1	1	1	1	1	1	1	1	1	1	0.999667	1	1
24	1	1	1	1	1	1	1	1	1	1	1	1	1	1	1	0.999667	1	1
25	1	1	1	1	1	1	1	1	1	1	1	1	1	1	1	0.999667	1	1
26	1	1	1	1	1	1	1	0.999667	1	1	1	1	1	1	1	0.999667	1	1
27	1	1	1	1	1	1	1	0.999667	1	1	1	0.999667	1	1	1	0.999667	1	1
28	1	1	1	1	1	1	1	0.999667	1	1	1	0.999667	1	1	1	0.999667	1	1
29	1	1	1	1	1	1	1	0.999667	1	1	1	0.999667	1	1	1	0.999667	1	1
30	1	1	1	1	1	1	1	0.999667	1	1	1	0.999667	1	1	1	0.999667	1	1
31	1	1	1	1	1	1	1	0.999667	1	1	1	0.999667	1	1	1	0.999667	1	1
32	1	1	1	1	1	1	1	0.999667	1	1	1	0.999667	1	1	1	0.999667	1	1
33	1	1	1	1	1	1	1	0.999667	1	1	1	0.999667	1	1	1	0.999333	1	1
34	1	1	1	1	1	1	1	0.999667	1	1	1	0.999667	1	1	1	0.999333	1	1
35	1	1	1	1	1	1	1	0.999667	1	1	1	0.999667	1	1	1	0.999333	1	1
36	1	1	1	1	1	1	1	0.999667	1	1	0.999667	0.999667	1	1	1	0.999333	1	1
37	1	1	1	1	1	1	1	0.999667	1	1	0.999667	0.999667	1	1	1	0.999333	1	1
38	1	1	1	1	1	1	1	0.999667	1	1	0.999667	0.999667	1	1	1	0.999333	1	1
39	1	1	1	1	1	1	1	0.999333	1	1	0.999667	0.999667	1	1	1	0.999333	1	1
40	1	1	1	1	1	1	1	0.999333	1	1	0.999667	0.999667	1	1	1	0.999333	1	1
41	1	1	1	1	1	1	1	0.999333	1	1	0.999667	0.999667	1	1	1	0.999333	1	1
43	1	1	1	1	1	1	1	0.999333	1	1	0.999667	0.999667	1	1	1	0.999333	1	1
43	1	1	1	1	1	1	1	0.999333	1	1	0.999667	0.999667	1	1	0.999667	0.999333	0.999667	1
44	1	1	0.999667	1	1	1	1	0.999333	1	1	0.999667	0.999667	1	1	0.999667	0.999333	0.999667	1
45	1	1	0.999667	0.999667	1	1	1	0.999333	1	1	0.999667	0.999667	1	1	0.999667	0.999333	0.999667	1
46	1	1	0.999667	0.999667	1	1	1	0.999333	1	1	0.999667	0.999667	1	1	0.999667	0.999333	0.999667	1
48	1	1	0.999667	0.999667	1	1	1	0.999333	1	1	0.999667	0.999667	1	1	0.999667	0.999333	0.999667	1
49	1	1	0.999667	0.999667	1	1	1	0.999333	1	1	0.999667	0.999667	1	1	0.999667	0.999333	0.999667	1
50	1	1	0.999667	0.999667	1	1	1	0.999333	1	1	0.999667	0.999667	1	1	0.999667	0.999333	0.999667	1
51	1	1	0.999667	0.999667	1	1	1	0.999333	1	1	0.999667	0.999667	1	1	0.999667	0.999333	0.999667	1
52	1	1	0.999667	0.999667	1	1	1	0.999333	1	1	0.999667	0.999667	1	1	0.999667	0.999333	0.999667	1
53	1	1	0.999667	0.999667	1	1	1	0.999333	1	1	0.999667	0.999667	1	1	0.999667	0.999333	0.999667	1
54	1	1	0.999667	0.999667	1	1	1	0.999333	1	1	0.999667	0.999667	1	1	0.999667	0.999333	0.999667	1
55	1	1	0.999667	0.999667	1	1	1	0.999	1	1	0.999667	0.999667	1	1	0.999667	0.999333	0.999667	1
56	1	1	0.999667	0.999667	1	1	1	0.999	1	1	0.999667	0.999333	1	1	0.999667	0.999333	0.999667	1
57	1	1	0.999667	0.999667	1	1	1	0.999	1	1	0.999667	0.999333	1	1	0.999667	0.999333	0.999667	1
58	1	1	0.999667	0.999667	1	1	1	0.999	1	1	0.999667	0.999333	1	1	0.999667	0.999	0.999667	1
59	1	1	0.999667	0.999667	1	1	1	0.999	1	1	0.999667	0.999333	1	1	0.999667	0.999	0.999667	1
60	1	1	0.999667	0.999667	1	1	1	0.999	1	1	0.999667	0.999333	1	1	0.999667	0.999	0.999667	1
61	1	1	0.999667	0.999667	1	1	1	0.999	1	1	0.999667	0.999333	1	1	0.999667	0.999	0.999667	1
62	1	1	0.999667	0.999667	1	1	1	0.999	1	1	0.999667	0.999333	1	1	0.999667	0.999	0.999667	1
63	1	1	0.999667	0.999667	1	1	1	0.999	1	1	0.999667	0.999333	1	1	0.999667	0.999	0.999667	1
64	1	1	0.999667	0.999667	1	1	1	0.999	1	1	0.999667	0.999	1	1	0.999667	0.999	0.999667	1
65	1	1	0.999667	0.999667	1	1	1	0.999	1	1	0.999667	0.999	1	1	0.999333	0.999	0.999667	1
66	1	1	0.999667	0.999667	1	1	1	0.999	1	1	0.999667	0.999	1	1	0.999333	0.999	0.999667	1
67	1	1	0.999333	0.999667	1	1	1	0.999	1	1	0.999667	0.999	1	1	0.999333	0.999	0.999667	0.999667
68	1	1	0.999333	0.999667	1	1	1	0.999	1	1	0.999333	0.999	1	1	0.999333	0.999	0.999667	0.999667
69	1	1	0.999333	0.999667	1	1	1	0.999	1	1	0.999333	0.999	1	1	0.999333	0.999	0.999667	0.999667
70	1	1	0.999333	0.999667	1	1	1	0.999	1	1	0.999333	0.999	1	1	0.999333	0.998667	0.999667	0.999667
71	1	1	0.999333	0.999667	1	1	1	0.999	1	1	0.999333	0.999	1	1	0.999333	0.998667	0.999667	0.999667
72	1	1	0.999333	0.999667	1	1	1	0.998667	1	1	0.999333	0.999	1	1	0.999333	0.998667	0.999667	0.999667
73	1	1	0.999333	0.999667	1	1	1	0.998667	1	1	0.999333	0.998667	1	1	0.999333	0.998667	0.999667	0.999667
74	1	1	0.999333	0.999667	1	1	1	0.998667	1	1	0.999333	0.998667	1	1	0.999333	0.998667	0.999667	0.999667
75	1	1	0.999333	0.999667	1	1	1	0.998667	1	1	0.999333	0.998667	1	1	0.999333	0.998667	0.999667	0.999667
76	1	1	0.999333	0.999667	1	1	1	0.998667	1	1	0.999333	0.998667	1	1	0.999333	0.998667	0.999667	0.999667
77	1	1	0.999333	0.999667	1	1	1	0.998667	1	1	0.999333	0.998667	1	1	0.999333	0.998667	0.999667	0.999667
78	1	1	0.999333	0.999667	1	1	1	0.998667	1	1	0.999333	0.998667	1	1	0.999333	0.998667	0.999667	0.999667
79	1	1	0.999333	0.999667	1	1	1	0.998667	1	1	0.999333	0.998667	1	1	0.999	0.998667	0.999667	0.999667
80	1	1	0.999333	0.999667	1	1	1	0.998667	1	1	0.999333	0.998667	1	1	0.999	0.998667	0.999667	0.999667
81	1	1	0.999333	0.999667	1	1	1	0.998667	1	1	0.999333	0.998333	1	1	0.999	0.998667	0.999667	0.999667
82	1	1	0.999333	0.999667	1	1	1	0.998667	1	1	0.999333	0.998333	1	1	0.999	0.998667	0.999667	0.999667
83	1	1	0.999333	0.999667	1	1	1	0.998667	1	1	0.999333	0.998333	1	1	0.999	0.998667	0.999667	0.999667
84	1	1	0.999333	0.999667	1	1	1	0.998667	1	1	0.999	0.998333	1	1	0.999	0.998667	0.999667	0.999667
85	1	1	0.999333	0.999667	1	1	1	0.998667	1	1	0.999	0.998333	1	1	0.999	0.998667	0.999667	0.999667
86	1	1	0.999333	0.999667	1	1	1	0.998667	1	1	0.999	0.998333	1	1	0.999	0.998667	0.999667	0.999667
87	1	1	0.999333	0.999667	1	1	1	0.998667	1	1	0.999	0.998333	1	1	0.999	0.998667	0.999667	0.999667
88	1	1	0.999333	0.999667	1	1	1	0.998667	0.999667	1	0.999	0.998333	1	1	0.999	0.998667	0.999667	0.999333
89	1	1	0.999333	0.999667	1	1	1	0.998667	0.999667	1	0.999	0.998333	1	1	0.999	0.998667	0.999667	0.999333
90	1	1	0.999333	0.999667	1	1	1	0.998667	0.999667	1	0.999	0.998333	1	1	0.999	0.998333	0.999667	0.999333
91	1	1	0.999333	0.999667	1	1	1	0.998667	0.999667	1	0.999	0.998333	1	1	0.998667	0.998333	0.999667	0.999333
92	1	1	0.999333	0.999667	1	1	1	0.998667	0.999667	1	0.999	0.998333	1	1	0.998667	0.998333	0.999667	0.999333
93	1	1	0.999333	0.999667	1	1	1	0.998667	0.999667	1	0.999	0.998333	1	1	0.998667	0.998333	0.999667	0.999333
94	1	1	0.999333	0.999667	1	1	1	0.998667	0.999667	1	0.999	0.998333	1	1	0.998667	0.998333	0.999667	0.999333
95	1	1	0.999333	0.999667	1	1	1	0.998667	0.999667	1	0.999	0.998333	1	1	0.998667	0.998333	0.999667	0.999333
96	1	1	0.999333	0.999667	1	1	1	0.998667	0.999667	1	0.999	0.998333	1	1	0.998667	0.998333	0.999667	0.999333
97	1	1	0.999333	0.999667	1	1	1	0.998667	0.999667	1	0.998667	0.998333	1	1	0.998667	0.998333	0.999667	0.999333
98	1	1	0.999333	0.999667	1	1	1	0.998667	0.999667	1	0.998667	0.998333	1	1	0.998667	0.998333	0.999667	0.999333
99	1	1	0.999	0.999667	1	1	1	0.998667	0.999667	1	0.998667	0.998333	1	1	0.998667	0.998	0.999667	0.999333
100	1	1	0.999	0.999667	1	1	1	0.998333	0.999667	1	0.998667	0.998333	1	1	0.998667	0.998	0.999667	0.999333
101	1	1	0.999	0.999667	1	1	1	0.998333	0.999667	1	0.998667	0.998	1	1	0.998333	0.998	0.999667	0.999333
102	1	1	0.999	0.999667	1	1	1	0.998333	0.999667	1	0.998667	0.998	1	1	0.998333	0.998	0.999667	0.999333
103	1	1	0.999	0.999667	1	1	1	0.998333	0.999667	1	0.998667	0.998	1	1	0.998333	0.998	0.999333	0.999333
104	1	1	0.999	0.999667	1	1	1	0.998333	0.999667	1	0.998667	0.998	1	1	0.998333	0.998	0.999333	0.999333
105	1	1	0.999	0.999667	1	1	1	0.998333	0.999333	1	0.998667	0.998	1	1	0.998333	0.998	0.999333	0.999333
106	1	1	0.999	0.999667	1	1	1	0.998333	0.999333	1	0.998667	0.998	1	1	0.998333	0.998	0.999333	0.999333
107	1	1	0.999	0.999667	1	1	1	0.998333	0.999333	1	0.998667	0.998	1	1	0.998333	0.998	0.999333	0.999333
108	1	1	0.999	0.999667	1	1	1	0.998333	0.999333	1	0.998667	0.998	1	1	0.998333	0.998	0.999333	0.999333
109	1	1	0.999	0.999667	1	1	1	0.998	0.999333	1	0.998667	0.998	1	1	0.998333	0.998	0.999333	0.999333
110	1	1	0.999	0.999667	1	1	1	0.998	0.999333	1	0.998667	0.997667	1	1	0.998333	0.998	0.999333	0.999333
111	1	1	0.999	0.999667	1	1	1	0.998	0.999333	1	0.998667	0.997667	1	1	0.998333	0.998	0.999333	0.999333
112	1	1	0.999	0.999333	1	1	1	0.998	0.999333	1	0.998667	0.997667	1	1	0.998333	0.998	0.999333	0.999333
113	1	1	0.999	0.999333	1	1	1	0.998	0.999333	1	0.998667	0.997667	1	1	0.998333	0.998	0.999333	0.999333
114	1	1	0.999	0.999333	1	1	1	0.998	0.999333	1	0.998667	0.997667	1	0.999667	0.998333	0.998	0.999333	0.999333
115	1	1	0.999	0.999333	1	1	1	0.998	0.999333	1	0.998667	0.997667	1	0.999667	0.998333	0.998	0.999333	0.999333
116	1	1	0.999	0.999333	1	1	1	0.998	0.999333	1	0.998667	0.997667	1	0.999667	0.998333	0.998	0.999333	0.999333
117	1	1	0.999	0.999333	1	1	1	0.998	0.999333	1	0.998667	0.997667	1	0.999667	0.998	0.998	0.999333	0.999333
119	1	1	0.999	0.999333	1	1	1	0.998	0.999333	1	0.998667	0.997667	1	0.999667	0.998	0.998	0.999333	0.999
120	1	1	0.999	0.999333	1	1	1	0.998	0.999333	1	0.998667	0.997333	1	0.999667	0.998	0.998	0.999333	0.999
121	1	1	0.999	0.999333	1	1	1	0.998	0.999333	1	0.998333	0.997333	1	0.999667	0.998	0.998	0.999333	0.999
122	1	1	0.999	0.999333	1	1	1	0.998	0.999333	1	0.998333	0.997333	1	0.999667	0.998	0.997667	0.999333	0.999
123	1	1	0.999	0.999333	1	0.999667	1	0.998	0.999	1	0.998333	0.997333	1	0.999667	0.998	0.997667	0.999333	0.999
124	1	1	0.999	0.999333	1	0.999667	1	0.998	0.999	1	0.998333	0.997333	1	0.999667	0.998	0.997667	0.999333	0.999
125	1	1	0.999	0.999333	1	0.999667	1	0.998	0.999	1	0.998333	0.997333	1	0.999667	0.997667	0.997667	0.999333	0.999
126	1	1	0.999	0.999333	1	0.999667	1	0.998	0.999	1	0.998333	0.997333	1	0.999667	0.997667	0.997667	0.999333	0.999
127	1	1	0.999	0.999333	1	0.999667	1	0.998	0.999	1	0.998333	0.997333	1	0.999667	0.997667	0.997667	0.999333	0.999
128	1	1	0.999	0.999333	1	0.999667	1	0.998	0.999	1	0.998333	0.997333	1	0.999667	0.997667	0.997667	0.999333	0.999
129	1	1	0.999	0.999333	1	0.999667	1	0.997667	0.999	1	0.998333	0.997333	1	0.999667	0.997667	0.997667	0.999333	0.999
130	1	1	0.999	0.999333	0.999667	0.999667	1	0.997667	0.999	1	0.998333	0.997	1	0.999667	0.997667	0.997667	0.999333	0.999
131	1	1	0.999	0.999333	0.999667	0.999667	1	0.997667	0.999	1	0.998333	0.997	1	0.999667	0.997667	0.997667	0.999333	0.999
132	1	1	0.999	0.999333	0.999667	0.999667	1	0.997667	0.999	1	0.998	0.997	1	0.999667	0.997667	0.997667	0.999333	0.999
133	1	1	0.999	0.999333	0.999667	0.999667	1	0.997667	0.999	1	0.998	0.997	1	0.999667	0.997667	0.997667	0.999333	0.999
134	1	1	0.999	0.999333	0.999667	0.999667	1	0.997667	0.999	1	0.998	0.997	1	0.999667	0.997667	0.997667	0.999333	0.998667
135	1	1	0.999	0.999333	0.999667	0.999667	1	0.997667	0.999	1	0.998	0.997	1	0.999667	0.997667	0.997667	0.999333	0.998667
136	1	1	0.999	0.999333	0.999667	0.999667	1	0.997667	0.999	1	0.998	0.997	1	0.999667	0.997667	0.997667	0.999333	0.998667
137	1	1	0.999	0.999333	0.999667	0.999667	1	0.997667	0.998667	1	0.998	0.997	1	0.999667	0.997667	0.997667	0.999	0.998667
138	1	1	0.999	0.999333	0.999667	0.999667	1	0.997667	0.998667	1	0.998	0.997	1	0.999667	0.997667	0.997667	0.999	0.998667
139	1	1	0.998667	0.999333	0.999667	0.999667	1	0.997333	0.998667	1	0.998	0.996667	1	0.999667	0.997667	0.997667	0.999	0.998667
140	1	1	0.998667	0.999333	0.999667	0.999667	1	0.997333	0.998667	1	0.998	0.996667	1	0.999667	0.997667	0.997667	0.999	0.998667
141	1	1	0.998667	0.999333	0.999667	0.999667	1	0.997333	0.998667	1	0.997667	0.996667	1	0.999667	0.997667	0.997667	0.999	0.998667
142	1	1	0.998667	0.999333	0.999667	0.999667	1	0.997333	0.998667	1	0.997667	0.996667	1	0.999667	0.997667	0.997667	0.999	0.998667
143	1	1	0.998667	0.999333	0.999667	0.999667	1	0.997333	0.998667	1	0.997667	0.996667	1	0.999667	0.997667	0.997667	0.999	0.998667
144	1	1	0.998667	0.999333	0.999333	0.999667	1	0.997333	0.998667	1	0.997667	0.996667	1	0.999667	0.997333	0.997667	0.999	0.998667
145	1	1	0.998667	0.999	0.999333	0.999667	1	0.997333	0.998667	1	0.997667	0.996667	1	0.999667	0.997333	0.997667	0.999	0.998667
146	1	1	0.998667	0.999	0.999333	0.999667	1	0.997333	0.998667	1	0.997667	0.996333	1	0.999667	0.997333	0.997667	0.999	0.998667
147	1	1	0.998667	0.999	0.999333	0.999667	1	0.997	0.998333	1	0.997667	0.996333	1	0.999667	0.997333	0.997333	0.999	0.998667
148	1	1	0.998667	0.999	0.999333	0.999667	1	0.997	0.998333	1	0.997667	0.996333	1	0.999667	0.997333	0.997333	0.999	0.998667
149	1	1	0.998667	0.999	0.999333	0.999667	1	0.997	0.998333	1	0.997333	0.996333	1	0.999667	0.997333	0.997333	0.998667	0.998667
150	1	1	0.998667	0.999	0.999333	0.999667	1	0.997	0.998333	1	0.997333	0.996333	1	0.999667	0.997333	0.997333	0.998667	0.998667
151	1	1	0.998667	0.999	0.999333	0.999667	1	0.997	0.998333	1	0.997333	0.996333	1	0.999667	0.997333	0.997333	0.998667	0.998667
152	1	1	0.998667	0.999	0.999333	0.999333	1	0.997	0.998333	1	0.997333	0.996	1	0.999667	0.997333	0.997333	0.998667	0.998667
153	1	1	0.998667	0.999	0.999333	0.999333	1	0.997	0.998333	1	0.997333	0.996	1	0.999667	0.997333	0.997333	0.998667	0.998667
154	1	1	0.998667	0.999	0.999333	0.999333	1	0.997	0.998333	1	0.997333	0.996	1	0.999667	0.997	0.997333	0.998667	0.998667
155	1	1	0.998667	0.999	0.999333	0.999333	1	0.997	0.998	1	0.997333	0.996	1	0.999667	0.997	0.997333	0.998667	0.998667
156	1	1	0.998667	0.999	0.999333	0.999333	1	0.997	0.998	1	0.997333	0.996	1	0.999667	0.997	0.997333	0.998667	0.998667
157	1	1	0.998667	0.999	0.999	0.999333	1	0.997	0.998	1	0.997	0.996	1	0.999667	0.997	0.997333	0.998667	0.998667
158	1	1	0.998667	0.999	0.999	0.999333	1	0.997	0.998	1	0.997	0.996	1	0.999667	0.997	0.997333	0.998667	0.998667
159	1	1	0.998667	0.999	0.999	0.999333	1	0.997	0.998	1	0.997	0.996	1	0.999667	0.997	0.997	0.998667	0.998667
160	1	1	0.998667	0.999	0.999	0.999333	1	0.997	0.998	1	0.997	0.996	1	0.999667	0.997	0.997	0.998667	0.998667
161	1	1	0.998667	0.999	0.999	0.999333	1	0.997	0.998	1	0.997	0.996	1	0.999667	0.997	0.997	0.998667	0.998667
162	1	1	0.998667	0.999	0.999	0.999333	1	0.997	0.998	1	0.997	0.996	1	0.999667	0.997	0.997	0.998667	0.998667
163	1	1	0.998333	0.999	0.999	0.999333	1	0.997	0.998	1	0.997	0.995667	1	0.999667	0.997	0.997	0.998667	0.998333
164	1	1	0.998333	0.999	0.999	0.999333	1	0.997	0.998	1	0.997	0.995667	1	0.999667	0.996667	0.997	0.998667	0.998333
165	1	1	0.998333	0.999	0.999	0.999	1	0.997	0.997667	1	0.997	0.995667	1	0.999667	0.996667	0.997	0.998667	0.998333
166	1	1	0.998333	0.999	0.999	0.999	1	0.997	0.997667	1	0.997	0.995667	1	0.999667	0.996667	0.997	0.998667	0.998333
167	1	1	0.998333	0.998667	0.999	0.999	1	0.997	0.997667	1	0.997	0.995667	1	0.999667	0.996667	0.997	0.998667	0.998333
168	1	1	0.998333	0.998667	0.998667	0.999	1	0.997	0.997667	1	0.997	0.995667	1	0.999667	0.996667	0.997	0.998667	0.998333
170	1	1	0.998333	0.998667	0.998667	0.999	1	0.996667	0.997667	1	0.997	0.995667	1	0.999667	0.996667	0.997	0.998667	0.998333
170	1	1	0.998333	0.998667	0.998667	0.999	1	0.996667	0.997667	1	0.997	0.995667	1	0.999667	0.996667	0.997	0.998333	0.998333
171	1	1	0.998333	0.998667	0.998667	0.999	1	0.996667	0.997667	1	0.996667	0.995667	1	0.999667	0.996667	0.997	0.998333	0.998333
172	1	1	0.998333	0.998667	0.998667	0.999	1	0.996667	0.997667	1	0.996667	0.995667	1	0.999667	0.996667	0.996667	0.998333	0.998
173	1	1	0.998333	0.998667	0.998667	0.999	1	0.996667	0.997667	1	0.996667	0.995667	1	0.999667	0.996667	0.996667	0.998333	0.998
174	1	1	0.998333	0.998667	0.998667	0.999	1	0.996667	0.997667	1	0.996667	0.995667	1	0.999333	0.996333	0.996667	0.998333	0.998
175	1	1	0.998	0.998667	0.998667	0.999	1	0.996667	0.997667	1	0.996667	0.995333	1	0.999333	0.996333	0.996667	0.998333	0.998
177	1	1	0.998	0.998667	0.998667	0.999	1	0.996667	0.997667	1	0.996667	0.995333	1	0.999333	0.996333	0.996667	0.998333	0.998
177	1	1	0.998	0.998667	0.998667	0.999	1	0.996333	0.997667	1	0.996667	0.995333	1	0.999333	0.996333	0.996667	0.998333	0.998
178	1	1	0.998	0.998667	0.998667	0.999	1	0.996333	0.997333	1	0.996667	0.995333	1	0.999333	0.996333	0.996667	0.998333	0.998
179	1	1	0.998	0.998667	0.998667	0.999	1	0.996333	0.997333	1	0.996667	0.995333	1	0.999333	0.996333	0.996667	0.998333	0.998
180	1	1	0.998	0.998667	0.998667	0.999	1	0.996333	0.997333	1	0.996667	0.995333	1	0.999333	0.996333	0.996667	0.998333	0.998
181	1	1	0.998	0.998667	0.998667	0.999	1	0.996333	0.997333	1	0.996667	0.995	1	0.999333	0.996	0.996667	0.998333	0.998
182	1	1	0.998	0.998667	0.998667	0.999	1	0.996333	0.997333	1	0.996667	0.995	1	0.999333	0.996	0.996667	0.998333	0.998
184	1	1	0.998	0.998667	0.998667	0.999	1	0.996333	0.997333	1	0.996667	0.995	1	0.999333	0.996	0.996667	0.998333	0.998
184	1	1	0.998	0.998667	0.998667	0.999	1	0.996333	0.997333	1	0.996667	0.995	1	0.999333	0.996	0.996667	0.998	0.998
185	1	1	0.998	0.998667	0.998667	0.999	1	0.996333	0.997	1	0.996667	0.995	1	0.999333	0.996	0.996667	0.998	0.998
187	1	1	0.998	0.998667	0.998667	0.999	1	0.996333	0.997	1	0.996333	0.994667	1	0.999333	0.996	0.996667	0.998	0.997667
188	1	1	0.998	0.998667	0.998667	0.999	1	0.996	0.997	1	0.996333	0.994667	1	0.999333	0.996	0.996667	0.998	0.997667
189	1	1	0.998	0.998667	0.998667	0.999	1	0.996	0.997	1	0.996333	0.994667	1	0.999333	0.996	0.996333	0.998	0.997667
190	1	1	0.998	0.998333	0.998667	0.999	1	0.996	0.997	1	0.996333	0.994667	1	0.999333	0.996	0.996333	0.998	0.997667
191	1	1	0.998	0.998333	0.998667	0.998667	1	0.996	0.997	1	0.996333	0.994333	1	0.999333	0.996	0.996333	0.998	0.997667
192	1	1	0.998	0.998333	0.998667	0.998667	1	0.996	0.997	1	0.996333	0.994333	1	0.999333	0.996	0.996333	0.998	0.997667
193	1	1	0.998	0.998333	0.998667	0.998667	1	0.996	0.997	1	0.996333	0.994333	1	0.999333	0.996	0.996333	0.998	0.997667
194	1	1	0.998	0.998333	0.998667	0.998667	1	0.996	0.996667	1	0.996333	0.994333	1	0.999333	0.996	0.996333	0.998	0.997667
195	1	1	0.998	0.998333	0.998667	0.998667	1	0.996	0.996667	1	0.996333	0.994333	1	0.999333	0.995667	0.996333	0.998	0.997667
196	1	1	0.998	0.998333	0.998667	0.998667	1	0.996	0.996667	1	0.996333	0.994333	1	0.999333	0.995667	0.996333	0.998	0.997667
197	1	1	0.998	0.998333	0.998667	0.998667	1	0.996	0.996667	1	0.996	0.994	1	0.999333	0.995667	0.996333	0.998	0.997667
198	1	1	0.998	0.998333	0.998333	0.998667	1	0.996	0.996667	0.999667	0.996	0.994	1	0.999333	0.995667	0.996333	0.998	0.997667
199	1	1	0.998	0.998333	0.998333	0.998667	1	0.995667	0.996667	0.999667	0.996	0.994	1	0.999	0.995667	0.996333	0.997667	0.997333
200	1	1	0.998	0.998333	0.998333	0.998667	1	0.995667	0.996667	0.999667	0.996	0.994	1	0.999	0.995667	0.996333	0.997667	0.997333
201	1	1	0.998	0.998333	0.998333	0.998667	1	0.995667	0.996667	0.999667	0.996	0.994	1	0.999	0.995667	0.996333	0.997667	0.997333
202	1	1	0.998	0.998333	0.998333	0.998667	1	0.995667	0.996667	0.999667	0.996	0.993667	1	0.999	0.995667	0.996333	0.997667	0.997333
203	1	1	0.998	0.998333	0.998333	0.998667	1	0.995667	0.996333	0.999667	0.996	0.993667	1	0.999	0.995667	0.996	0.997667	0.997333
204	1	1	0.997667	0.998333	0.998333	0.998667	1	0.995667	0.996333	0.999667	0.996	0.993667	1	0.999	0.995333	0.996	0.997667	0.997333
205	1	1	0.997667	0.998333	0.998333	0.998667	1	0.995667	0.996333	0.999667	0.995667	0.993667	1	0.999	0.995333	0.996	0.997667	0.997333
206	1	1	0.997667	0.998333	0.998333	0.998667	1	0.995667	0.996333	0.999667	0.995667	0.993667	1	0.999	0.995333	0.996	0.997667	0.997333
207	1	1	0.997667	0.998333	0.998333	0.998667	1	0.995333	0.996333	0.999667	0.995667	0.993667	1	0.999	0.995333	0.996	0.997667	0.997333
208	1	1	0.997667	0.998333	0.998333	0.998333	1	0.995333	0.996333	0.999667	0.995667	0.993333	1	0.999	0.995333	0.996	0.997667	0.997333
209	1	1	0.997667	0.998333	0.998333	0.998333	1	0.995333	0.996333	0.999667	0.995667	0.993333	1	0.999	0.995333	0.996	0.997667	0.997333
210	1	1	0.997667	0.998333	0.998333	0.998333	0.999667	0.995333	0.996333	0.999667	0.995667	0.993333	1	0.999	0.995	0.996	0.997667	0.997333
211	1	1	0.997667	0.998333	0.998333	0.998333	0.999667	0.995333	0.996333	0.999667	0.995667	0.993333	1	0.999	0.995	0.996	0.997333	0.997333
212	1	1	0.997667	0.998333	0.998333	0.998333	0.999667	0.995333	0.996333	0.999667	0.995667	0.993333	1	0.999	0.995	0.996	0.997333	0.997
213	1	1	0.997667	0.998333	0.998333	0.998333	0.999667	0.995	0.996333	0.999667	0.995333	0.993333	1	0.999	0.995	0.996	0.997333	0.997
214	1	1	0.997667	0.998333	0.998333	0.998333	0.999667	0.995	0.996333	0.999667	0.995333	0.993333	1	0.999	0.995	0.996	0.997333	0.997
215	1	1	0.997667	0.998333	0.998333	0.998333	0.999667	0.995	0.996	0.999667	0.995333	0.993	1	0.999	0.995	0.996	0.997333	0.997
216	1	1	0.997667	0.998333	0.998333	0.998333	0.999667	0.995	0.996	0.999667	0.995333	0.993	1	0.999	0.994667	0.996	0.997333	0.997
217	1	1	0.997667	0.998333	0.998333	0.998333	0.999667	0.995	0.996	0.999667	0.995333	0.993	1	0.999	0.994667	0.996	0.997333	0.997
218	1	1	0.997667	0.998333	0.998333	0.998333	0.999667	0.995	0.996	0.999667	0.995333	0.993	1	0.999	0.994667	0.996	0.997333	0.997
219	1	1	0.997667	0.998333	0.998333	0.998333	0.999667	0.995	0.996	0.999333	0.995333	0.993	1	0.999	0.994667	0.996	0.997333	0.997
220	1	1	0.997667	0.998333	0.998	0.998333	0.999667	0.995	0.996	0.999333	0.995333	0.993	1	0.999	0.994667	0.996	0.997333	0.997
221	1	1	0.997667	0.998333	0.998	0.998333	0.999667	0.995	0.995667	0.999333	0.995333	0.993	1	0.998667	0.994667	0.995667	0.997333	0.997
222	1	1	0.997667	0.998333	0.998	0.998333	0.999667	0.995	0.995667	0.999333	0.995	0.992667	1	0.998667	0.994667	0.995667	0.997333	0.997
223	1	1	0.997667	0.998333	0.998	0.998333	0.999667	0.994667	0.995667	0.999333	0.995	0.992667	1	0.998667	0.994667	0.995667	0.997333	0.997
224	1	1	0.997667	0.998333	0.998	0.998333	0.999667	0.994667	0.995667	0.999333	0.995	0.992667	1	0.998667	0.994667	0.995667	0.997333	0.997
225	1	1	0.997667	0.998333	0.998	0.998333	0.999667	0.994667	0.995667	0.999333	0.995	0.992667	1	0.998667	0.994333	0.995667	0.997333	0.997
226	1	1	0.997667	0.998333	0.998	0.998333	0.999667	0.994667	0.995667	0.999333	0.995	0.992667	1	0.998667	0.994333	0.995667	0.997333	0.997
227	1	1	0.997667	0.998333	0.998	0.998333	0.999667	0.994667	0.995667	0.999333	0.995	0.992333	1	0.998667	0.994333	0.995667	0.997333	0.996667
228	1	1	0.997667	0.998333	0.998	0.998333	0.999667	0.994667	0.995667	0.999333	0.994667	0.992333	1	0.998667	0.994333	0.995667	0.997333	0.996667
229	1	1	0.997667	0.998333	0.998	0.998333	0.999667	0.994667	0.995667	0.999333	0.994667	0.992333	1	0.998667	0.994333	0.995667	0.997333	0.996667
230	1	1	0.997667	0.998333	0.998	0.998333	0.999667	0.994667	0.995667	0.999333	0.994667	0.992333	1	0.998667	0.994333	0.995667	0.997333	0.996667
231	1	1	0.997667	0.998333	0.998	0.998333	0.999667	0.994667	0.995667	0.999333	0.994667	0.992333	1	0.998667	0.994333	0.995667	0.997333	0.996667
232	1	1	0.997667	0.998333	0.998	0.998333	0.999667	0.994667	0.995333	0.999333	0.994667	0.992333	1	0.998667	0.994333	0.995667	0.997333	0.996667
233	1	1	0.997667	0.998333	0.997667	0.998333	0.999667	0.994667	0.995333	0.999333	0.994667	0.992	1	0.998667	0.994333	0.995667	0.997333	0.996667
234	1	1	0.997667	0.998	0.997667	0.998	0.999667	0.994667	0.995333	0.999333	0.994333	0.992	1	0.998667	0.994333	0.995667	0.997	0.996667
235	1	1	0.997333	0.998	0.997667	0.998	0.999667	0.994667	0.995333	0.999333	0.994333	0.992	1	0.998667	0.994	0.995667	0.997	0.996667
236	1	1	0.997333	0.998	0.997667	0.998	0.999667	0.994333	0.995333	0.999333	0.994333	0.992	1	0.998667	0.994	0.995667	0.997	0.996667
237	1	1	0.997333	0.998	0.997667	0.998	0.999667	0.994333	0.995333	0.999333	0.994333	0.992	1	0.998667	0.994	0.995667	0.997	0.996333
238	1	1	0.997333	0.998	0.997667	0.998	0.999667	0.994333	0.995333	0.999333	0.994333	0.992	1	0.998667	0.994	0.995333	0.997	0.996333
239	1	1	0.997333	0.998	0.997667	0.998	0.999667	0.994333	0.995333	0.999333	0.994333	0.992	1	0.998667	0.994	0.995333	0.997	0.996333
240	1	1	0.997333	0.998	0.997667	0.998	0.999667	0.994333	0.995	0.999333	0.994333	0.991667	1	0.998667	0.994	0.995333	0.997	0.996333
241	1	1	0.997333	0.998	0.997667	0.998	0.999667	0.994333	0.995	0.999333	0.994333	0.991667	1	0.998667	0.993667	0.995333	0.997	0.996333
242	1	1	0.997333	0.998	0.997667	0.998	0.999667	0.994333	0.995	0.999333	0.994	0.991667	1	0.998667	0.993667	0.995333	0.997	0.996333
243	1	1	0.997333	0.998	0.997667	0.998	0.999667	0.994	0.995	0.999333	0.994	0.991667	1	0.998667	0.993667	0.995333	0.997	0.996333
244	1	1	0.997333	0.998	0.997667	0.998	0.999667	0.994	0.995	0.999333	0.994	0.991667	1	0.998667	0.993667	0.995333	0.997	0.996333
245	1	1	0.997333	0.998	0.997667	0.998	0.999667	0.994	0.995	0.999333	0.994	0.991333	1	0.998667	0.993667	0.995333	0.997	0.996333
247	1	1	0.997333	0.998	0.997667	0.998	0.999667	0.994	0.995	0.999333	0.994	0.991333	1	0.998667	0.993667	0.995333	0.996667	0.996
247	1	1	0.997333	0.998	0.997667	0.998	0.999667	0.994	0.995	0.999333	0.994	0.991333	1	0.998667	0.993333	0.995333	0.996667	0.996
248	1	1	0.997333	0.998	0.997667	0.998	0.999667	0.994	0.994667	0.999333	0.994	0.991333	1	0.998333	0.993333	0.995333	0.996667	0.996
249	1	1	0.997333	0.998	0.997667	0.998	0.999667	0.994	0.994667	0.999333	0.993667	0.991	1	0.998333	0.993333	0.995333	0.996667	0.996
250	1	1	0.997333	0.998	0.997667	0.997667	0.999667	0.994	0.994667	0.999333	0.993667	0.991	1	0.998333	0.993333	0.995333	0.996667	0.996
251	1	1	0.997	0.998	0.997667	0.997667	0.999667	0.994	0.994667	0.999333	0.993667	0.991	1	0.998333	0.993333	0.995333	0.996667	0.996
252	1	1	0.997	0.998	0.997667	0.997667	0.999667	0.993667	0.994667	0.999333	0.993667	0.991	1	0.998333	0.993	0.995333	0.996667	0.996
254	1	1	0.997	0.998	0.997667	0.997667	0.999667	0.993667	0.994667	0.999333	0.993667	0.991	1	0.998333	0.993	0.995333	0.996667	0.996
255	1	1	0.997	0.998	0.997667	0.997667	0.999667	0.993667	0.994333	0.999333	0.993667	0.990667	1	0.998333	0.993	0.995333	0.996667	0.996
256	1	1	0.997	0.998	0.997667	0.997667	0.999667	0.993667	0.994333	0.999333	0.993667	0.990667	0.999667	0.998333	0.993	0.995333	0.996667	0.996
257	1	1	0.997	0.997667	0.997667	0.997667	0.999667	0.993667	0.994333	0.999333	0.993333	0.990667	0.999667	0.998333	0.993	0.995333	0.996667	0.996
258	1	1	0.997	0.997667	0.997667	0.997667	0.999667	0.993667	0.994333	0.999333	0.993333	0.990667	0.999667	0.998333	0.993	0.995	0.996667	0.996
259	1	1	0.997	0.997667	0.997667	0.997667	0.999667	0.993667	0.994333	0.999333	0.993333	0.990667	0.999667	0.998333	0.993	0.995	0.996667	0.996
260	1	1	0.997	0.997667	0.997667	0.997667	0.999667	0.993667	0.994333	0.999333	0.993333	0.990333	0.999667	0.998	0.992667	0.995	0.996667	0.995667
261	1	1	0.997	0.997667	0.997667	0.997667	0.999667	0.993333	0.994333	0.999333	0.993333	0.990333	0.999667	0.998	0.992667	0.995	0.996667	0.995667
262	1	0.999667	0.997	0.997667	0.997667	0.997333	0.999667	0.993333	0.994	0.999333	0.993333	0.990333	0.999667	0.998	0.992667	0.995	0.996333	0.995667
263	1	0.999667	0.997	0.997667	0.997667	0.997333	0.999667	0.993333	0.994	0.999333	0.993333	0.990333	0.999667	0.998	0.992667	0.995	0.996333	0.995667
264	1	0.999667	0.997	0.997667	0.997667	0.997333	0.999667	0.993333	0.994	0.999333	0.993333	0.990333	0.999667	0.998	0.992667	0.995	0.996333	0.995667
265	1	0.999667	0.997	0.997667	0.997333	0.997333	0.999667	0.993333	0.994	0.999333	0.993	0.990333	0.999667	0.998	0.992667	0.995	0.996333	0.995667
266	1	0.999667	0.997	0.997667	0.997333	0.997333	0.999667	0.993333	0.994	0.999333	0.993	0.99	0.999667	0.998	0.992667	0.995	0.996333	0.995667
267	1	0.999667	0.997	0.997667	0.997333	0.997333	0.999667	0.993	0.993667	0.999333	0.993	0.99	0.999667	0.998	0.992333	0.995	0.996333	0.995667
268	1	0.999667	0.997	0.997667	0.997333	0.997333	0.999667	0.993	0.993667	0.999333	0.993	0.99	0.999667	0.998	0.992333	0.995	0.996	0.995667
269	1	0.999667	0.997	0.997667	0.997333	0.997333	0.999667	0.993	0.993667	0.999333	0.993	0.99	0.999667	0.998	0.992333	0.995	0.996	0.995667
270	1	0.999667	0.997	0.997667	0.997333	0.997333	0.999667	0.993	0.993667	0.999	0.992667	0.99	0.999667	0.998	0.992333	0.994667	0.996	0.995667
271	1	0.999667	0.996667	0.997667	0.997333	0.997333	0.999667	0.993	0.993667	0.999	0.992667	0.99	0.999667	0.998	0.992333	0.994667	0.996	0.995667
272	1	0.999667	0.996667	0.997667	0.997333	0.997333	0.999667	0.993	0.993667	0.999	0.992667	0.99	0.999667	0.998	0.992333	0.994667	0.996	0.995333
273	1	0.999667	0.996667	0.997667	0.997333	0.997333	0.999667	0.993	0.993667	0.999	0.992667	0.989667	0.999667	0.998	0.992333	0.994667	0.996	0.995333
274	1	0.999667	0.996667	0.997667	0.997333	0.997333	0.999667	0.992667	0.993667	0.999	0.992667	0.989667	0.999667	0.998	0.992	0.994667	0.996	0.995333
275	1	0.999667	0.996667	0.997667	0.997333	0.997333	0.999667	0.992667	0.993333	0.999	0.992667	0.989667	0.999667	0.998	0.992	0.994667	0.996	0.995333
276	1	0.999667	0.996667	0.997667	0.997333	0.997333	0.999667	0.992667	0.993333	0.999	0.992667	0.989667	0.999667	0.998	0.992	0.994667	0.996	0.995333
277	1	0.999667	0.996667	0.997667	0.997333	0.997333	0.999667	0.992667	0.993333	0.999	0.992333	0.989667	0.999667	0.998	0.992	0.994667	0.996	0.995333
278	1	0.999667	0.996667	0.997667	0.997333	0.997333	0.999667	0.992667	0.993333	0.999	0.992333	0.989667	0.999667	0.998	0.992	0.994667	0.995667	0.995333
279	1	0.999667	0.996667	0.997667	0.997333	0.997333	0.999667	0.992333	0.993333	0.999	0.992333	0.989333	0.999667	0.998	0.991667	0.994667	0.995667	0.995333
280	1	0.999667	0.996333	0.997667	0.997333	0.997	0.999667	0.992333	0.993333	0.999	0.992333	0.989333	0.999667	0.997667	0.991667	0.994667	0.995667	0.995333
281	1	0.999667	0.996333	0.997333	0.997333	0.997	0.999667	0.992333	0.993333	0.999	0.992333	0.989333	0.999667	0.997667	0.991667	0.994333	0.995667	0.995333
282	1	0.999667	0.996333	0.997333	0.997333	0.997	0.999667	0.992333	0.993333	0.999	0.992333	0.989333	0.999667	0.997667	0.991667	0.994333	0.995667	0.995333
283	1	0.999667	0.996333	0.997333	0.997	0.997	0.999667	0.992333	0.993333	0.999	0.992333	0.989333	0.999667	0.997667	0.991667	0.994333	0.995667	0.995333
284	1	0.999667	0.996333	0.997333	0.997	0.997	0.999667	0.992333	0.993	0.999	0.992333	0.989	0.999667	0.997667	0.991667	0.994333	0.995667	0.995333
285	1	0.999667	0.996333	0.997333	0.997	0.997	0.999667	0.992333	0.993	0.999	0.992333	0.989	0.999667	0.997667	0.991333	0.994333	0.995667	0.995333
286	1	0.999667	0.996333	0.997333	0.997	0.997	0.999667	0.992333	0.993	0.998667	0.992	0.989	0.999667	0.997667	0.991333	0.994333	0.995667	0.995333
287	1	0.999667	0.996333	0.997333	0.997	0.997	0.999667	0.992	0.993	0.998667	0.992	0.988667	0.999667	0.997667	0.991333	0.994333	0.995667	0.995333
288	1	0.999667	0.996333	0.997333	0.997	0.997	0.999667	0.992	0.993	0.998667	0.992	0.988667	0.999667	0.997667	0.991333	0.994333	0.995667	0.995333
289	1	0.999667	0.996333	0.997333	0.997	0.997	0.999667	0.992	0.992667	0.998667	0.992	0.988667	0.999667	0.997667	0.991333	0.994333	0.995667	0.995333
290	1	0.999667	0.996333	0.997333	0.997	0.997	0.999667	0.992	0.992667	0.998667	0.992	0.988667	0.999667	0.997667	0.991	0.994333	0.995667	0.995333
291	1	0.999667	0.996333	0.997333	0.997	0.997	0.999667	0.992	0.992667	0.998667	0.992	0.988333	0.999667	0.997333	0.991	0.994333	0.995667	0.995
292	1	0.999333	0.996	0.997333	0.997	0.997	0.999667	0.992	0.992667	0.998667	0.992	0.988333	0.999667	0.997333	0.991	0.994333	0.995667	0.995
293	1	0.999333	0.996	0.997333	0.997	0.997	0.999667	0.992	0.992667	0.998667	0.991667	0.988333	0.999667	0.997333	0.991	0.994333	0.995667	0.995
294	1	0.999333	0.996	0.997333	0.997	0.997	0.999667	0.992	0.992333	0.998667	0.991667	0.988333	0.999667	0.997333	0.991	0.994333	0.995667	0.995
295	1	0.999333	0.996	0.997333	0.997	0.997	0.999667	0.992	0.992333	0.998667	0.991667	0.988333	0.999667	0.997333	0.991	0.994333	0.995667	0.995
296	1	0.999333	0.996	0.997333	0.997	0.997	0.999667	0.992	0.992333	0.998667	0.991667	0.988	0.999667	0.997333	0.990667	0.994333	0.995667	0.995
297	1	0.999333	0.996	0.997333	0.997	0.997	0.999667	0.991667	0.992333	0.998667	0.991667	0.988	0.999667	0.997333	0.990667	0.994333	0.995333	0.995
298	1	0.999333	0.996	0.997333	0.997	0.997	0.999667	0.991667	0.992	0.998667	0.991667	0.988	0.999667	0.997333	0.990667	0.994	0.995333	0.995
299	1	0.999333	0.996	0.997333	0.997	0.997	0.999667	0.991667	0.992	0.998667	0.991333	0.988	0.999667	0.997333	0.990667	0.994	0.995333	0.995
300	1	0.999333	0.996	0.997333	0.997	0.997	0.999667	0.991667	0.992	0.998667	0.991333	0.987667	0.999667	0.997333	0.990667	0.994	0.995333	0.995
301	1	0.999333	0.996	0.997333	0.997	0.997	0.999667	0.991667	0.992	0.998667	0.991333	0.987667	0.999667	0.997	0.990667	0.994	0.995333	0.995
302	1	0.999333	0.996	0.997333	0.997	0.997	0.999667	0.991667	0.992	0.998667	0.991333	0.987667	0.999667	0.997	0.990333	0.994	0.995333	0.994667
303	1	0.999333	0.996	0.997333	0.997	0.997	0.999667	0.991333	0.992	0.998667	0.991333	0.987667	0.999667	0.997	0.990333	0.994	0.995333	0.994667
304	1	0.999333	0.995667	0.997333	0.996667	0.997	0.999667	0.991333	0.992	0.998667	0.991333	0.987667	0.999667	0.997	0.990333	0.994	0.995333	0.994667
305	1	0.999333	0.995667	0.997333	0.996667	0.997	0.999667	0.991333	0.992	0.998333	0.991	0.987333	0.999667	0.997	0.990333	0.994	0.995333	0.994667
306	1	0.999333	0.995667	0.997333	0.996667	0.997	0.999667	0.991333	0.991667	0.998333	0.991	0.987333	0.999667	0.997	0.990333	0.994	0.995333	0.994667
307	1	0.999333	0.995667	0.997333	0.996667	0.996667	0.999667	0.991333	0.991667	0.998333	0.991	0.987333	0.999667	0.997	0.990333	0.994	0.995333	0.994667
308	1	0.999333	0.995667	0.997333	0.996667	0.996667	0.999667	0.991333	0.991667	0.998333	0.991	0.987333	0.999667	0.997	0.99	0.993667	0.995333	0.994667
309	1	0.999333	0.995667	0.997333	0.996667	0.996667	0.999667	0.991333	0.991667	0.998333	0.991	0.987	0.999667	0.997	0.99	0.993667	0.995333	0.994667
310	1	0.999333	0.995667	0.997333	0.996667	0.996667	0.999667	0.991	0.991667	0.998333	0.990667	0.987	0.999667	0.997	0.99	0.993667	0.995333	0.994667
311	1	0.999333	0.995667	0.997333	0.996667	0.996667	0.999667	0.991	0.991667	0.998333	0.990667	0.987	0.999667	0.997	0.99	0.993667	0.995	0.994667
312	1	0.999333	0.995667	0.997	0.996667	0.996667	0.999667	0.991	0.991667	0.998333	0.990667	0.987	0.999667	0.997	0.99	0.993667	0.995	0.994333
313	1	0.999333	0.995667	0.997	0.996667	0.996667	0.999667	0.991	0.991667	0.998333	0.990667	0.987	0.999667	0.997	0.989667	0.993667	0.995	0.994333
314	1	0.999333	0.995667	0.997	0.996667	0.996667	0.999667	0.991	0.991667	0.998333	0.990667	0.986667	0.999667	0.997	0.989667	0.993667	0.995	0.994333
315	1	0.999333	0.995667	0.997	0.996333	0.996333	0.999667	0.991	0.991667	0.998	0.990667	0.986667	0.999333	0.997	0.989667	0.993667	0.995	0.994333
316	1	0.999333	0.995667	0.997	0.996333	0.996333	0.999667	0.991	0.991333	0.998	0.990333	0.986667	0.999333	0.996667	0.989667	0.993667	0.995	0.994333
318	1	0.999333	0.995667	0.997	0.996333	0.996333	0.999333	0.990667	0.991333	0.998	0.990333	0.986667	0.999333	0.996667	0.989667	0.993333	0.995	0.994333
319	1	0.999333	0.995667	0.997	0.996333	0.996333	0.999333	0.990667	0.991333	0.998	0.990333	0.986667	0.999333	0.996667	0.989667	0.993333	0.995	0.994333
320	1	0.999333	0.995667	0.997	0.996333	0.996333	0.999333	0.990667	0.991333	0.998	0.990333	0.986333	0.999333	0.996667	0.989333	0.993333	0.995	0.994333
321	1	0.999333	0.995667	0.997	0.996333	0.996333	0.999333	0.990667	0.991333	0.998	0.990333	0.986333	0.999333	0.996667	0.989333	0.993333	0.995	0.994333
322	1	0.999333	0.995667	0.997	0.996333	0.996333	0.999333	0.990667	0.991333	0.998	0.990333	0.986333	0.999333	0.996667	0.989333	0.993333	0.995	0.994333
323	1	0.999333	0.995667	0.997	0.996333	0.996333	0.999333	0.990667	0.991333	0.998	0.990333	0.986333	0.999333	0.996667	0.989333	0.993333	0.995	0.994333
324	1	0.999333	0.995667	0.997	0.996333	0.996333	0.999333	0.990667	0.991333	0.998	0.990333	0.986333	0.999333	0.996667	0.989333	0.993333	0.994667	0.994333
325	1	0.999333	0.995667	0.996667	0.996333	0.996333	0.999333	0.990333	0.991333	0.998	0.99	0.986	0.999333	0.996667	0.989	0.993333	0.994667	0.994
326	1	0.999333	0.995333	0.996667	0.996333	0.996333	0.999333	0.990333	0.991	0.998	0.99	0.986	0.999333	0.996667	0.989	0.993333	0.994667	0.994
327	1	0.999333	0.995333	0.996667	0.996	0.996333	0.999333	0.990333	0.991	0.998	0.99	0.986	0.999333	0.996667	0.989	0.993333	0.994667	0.994
328	1	0.999333	0.995333	0.996667	0.996	0.996333	0.999333	0.990333	0.991	0.998	0.99	0.986	0.999333	0.996667	0.989	0.993333	0.994667	0.994
329	1	0.999333	0.995333	0.996667	0.996	0.996	0.999333	0.990333	0.991	0.998	0.99	0.986	0.999333	0.996333	0.989	0.993333	0.994667	0.994
330	1	0.999333	0.995333	0.996667	0.996	0.996	0.999333	0.990333	0.991	0.998	0.99	0.985667	0.999333	0.996333	0.989	0.993333	0.994667	0.994
331	1	0.999333	0.995333	0.996667	0.996	0.996	0.999333	0.99	0.990667	0.997667	0.99	0.985667	0.999333	0.996333	0.989	0.993333	0.994667	0.994
332	1	0.999333	0.995333	0.996667	0.996	0.996	0.999333	0.99	0.990667	0.997667	0.989667	0.985667	0.999333	0.996333	0.988667	0.993	0.994667	0.993667
333	1	0.999333	0.995333	0.996667	0.996	0.996	0.999333	0.99	0.990667	0.997667	0.989667	0.985667	0.999333	0.996333	0.988667	0.993	0.994667	0.993667
334	1	0.999333	0.995333	0.996667	0.996	0.996	0.999333	0.99	0.990667	0.997667	0.989667	0.985333	0.999333	0.996333	0.988667	0.993	0.994667	0.993667
335	1	0.999333	0.995333	0.996667	0.996	0.996	0.999333	0.99	0.990667	0.997667	0.989667	0.985333	0.999333	0.996333	0.988667	0.993	0.994333	0.993667
336	1	0.999333	0.995	0.996667	0.996	0.996	0.999333	0.99	0.990667	0.997667	0.989667	0.985333	0.999333	0.996333	0.988667	0.993	0.994333	0.993667
337	1	0.999333	0.995	0.996667	0.996	0.996	0.999333	0.989667	0.990333	0.997667	0.989667	0.985	0.999333	0.996333	0.988333	0.993	0.994333	0.993667
338	1	0.999333	0.995	0.996667	0.996	0.996	0.999333	0.989667	0.990333	0.997667	0.989667	0.985	0.999333	0.996333	0.988333	0.993	0.994333	0.993667
339	1	0.999333	0.995	0.996667	0.995667	0.996	0.999333	0.989667	0.990333	0.997667	0.989333	0.985	0.999333	0.996333	0.988333	0.993	0.994333	0.993667
340	1	0.999333	0.995	0.996667	0.995667	0.996	0.999333	0.989667	0.990333	0.997667	0.989333	0.985	0.999333	0.996333	0.988333	0.993	0.994333	0.993667
341	1	0.999333	0.995	0.996667	0.995667	0.996	0.999333	0.989667	0.990333	0.997667	0.989333	0.985	0.999333	0.996333	0.988333	0.992667	0.994333	0.993333
342	1	0.999333	0.995	0.996667	0.995667	0.996	0.999333	0.989667	0.990333	0.997667	0.989333	0.984667	0.999333	0.996333	0.988	0.992667	0.994333	0.993333
343	1	0.999333	0.995	0.996667	0.995667	0.996	0.999333	0.989667	0.990333	0.997333	0.989333	0.984667	0.999333	0.996	0.988	0.992667	0.994333	0.993333
344	1	0.999333	0.995	0.996667	0.995667	0.996	0.999333	0.989333	0.99	0.997333	0.989333	0.984667	0.999333	0.996	0.988	0.992667	0.994333	0.993333
345	1	0.999333	0.995	0.996667	0.995667	0.996	0.999333	0.989333	0.99	0.997333	0.989333	0.984667	0.999333	0.996	0.988	0.992667	0.994333	0.993333
346	1	0.999333	0.995	0.996667	0.995667	0.996	0.999333	0.989333	0.99	0.997333	0.989	0.984333	0.999333	0.996	0.988	0.992667	0.994	0.993333
347	1	0.999333	0.995	0.996667	0.995667	0.996	0.999333	0.989333	0.99	0.997333	0.989	0.984333	0.999333	0.996	0.987667	0.992667	0.994	0.993333
348	1	0.999333	0.995	0.996667	0.995667	0.996	0.999333	0.989333	0.99	0.997333	0.989	0.984333	0.999333	0.996	0.987667	0.992667	0.994	0.993333
349	1	0.999333	0.995	0.996333	0.995667	0.996	0.999	0.989333	0.989667	0.997333	0.989	0.984333	0.999333	0.996	0.987667	0.992667	0.994	0.993333
350	1	0.999333	0.995	0.996333	0.995667	0.996	0.999	0.989	0.989667	0.997333	0.989	0.984333	0.999333	0.996	0.987667	0.992333	0.994	0.993333
351	1	0.999333	0.995	0.996333	0.995667	0.996	0.999	0.989	0.989667	0.997333	0.989	0.984333	0.999333	0.996	0.987333	0.992333	0.994	0.993333
352	1	0.999333	0.995	0.996333	0.995667	0.995667	0.999	0.989	0.989667	0.997333	0.988667	0.984	0.999333	0.996	0.987333	0.992333	0.994	0.993
353	1	0.999333	0.995	0.996333	0.995667	0.995667	0.999	0.989	0.989333	0.997333	0.988667	0.984	0.999333	0.996	0.987333	0.992333	0.994	0.993
354	1	0.999333	0.995	0.996333	0.995333	0.995667	0.999	0.989	0.989333	0.997333	0.988667	0.984	0.999333	0.995667	0.987333	0.992333	0.993667	0.993
355	1	0.999333	0.994667	0.996333	0.995333	0.995667	0.999	0.989	0.989333	0.997	0.988667	0.984	0.999333	0.995667	0.987333	0.992333	0.993667	0.993
356	1	0.999333	0.994667	0.996333	0.995333	0.995667	0.999	0.988667	0.989333	0.997	0.988667	0.984	0.999333	0.995667	0.987	0.992333	0.993667	0.993
357	1	0.999333	0.994667	0.996333	0.995333	0.995667	0.999	0.988667	0.989333	0.997	0.988667	0.983667	0.999333	0.995667	0.987	0.992333	0.993667	0.993
358	1	0.999	0.994667	0.996333	0.995333	0.995667	0.999	0.988667	0.989	0.997	0.988667	0.983667	0.999333	0.995667	0.987	0.992	0.993667	0.993
359	1	0.999	0.994667	0.996333	0.995333	0.995667	0.999	0.988667	0.989	0.997	0.988333	0.983667	0.999333	0.995667	0.987	0.992	0.993667	0.993
360	1	0.999	0.994667	0.996333	0.995333	0.995667	0.999	0.988667	0.989	0.997	0.988333	0.983667	0.999333	0.995667	0.987	0.992	0.993667	0.993
361	1	0.999	0.994667	0.996333	0.995	0.995667	0.999	0.988667	0.989	0.997	0.988333	0.983333	0.999333	0.995667	0.987	0.992	0.993667	0.992667
362	1	0.999	0.994667	0.996333	0.995	0.995667	0.999	0.988667	0.989	0.997	0.988333	0.983333	0.999333	0.995333	0.986667	0.992	0.993667	0.992667
363	1	0.999	0.994667	0.996333	0.995	0.995667	0.999	0.988667	0.989	0.997	0.988333	0.983333	0.999333	0.995333	0.986667	0.992	0.993667	0.992667
364	1	0.999	0.994667	0.996333	0.995	0.995667	0.999	0.988333	0.988667	0.997	0.988333	0.983333	0.999	0.995333	0.986667	0.992	0.993667	0.992667
365	1	0.999	0.994667	0.996333	0.995	0.995667	0.999	0.988333	0.988667	0.997	0.988333	0.983333	0.999	0.995333	0.986667	0.992	0.993333	0.992667
366	1	0.999	0.994667	0.996333	0.995	0.995667	0.999	0.988333	0.988667	0.997	0.988333	0.983	0.999	0.995333	0.986667	0.992	0.993333	0.992667
367	1	0.999	0.994667	0.996333	0.995	0.995667	0.999	0.988333	0.988667	0.997	0.988	0.983	0.999	0.995333	0.986667	0.991667	0.993333	0.992667
368	1	0.999	0.994667	0.996333	0.995	0.995667	0.999	0.988333	0.988667	0.996667	0.988	0.983	0.999	0.995333	0.986333	0.991667	0.993333	0.992667
369	1	0.999	0.994667	0.996333	0.994667	0.995667	0.999	0.988	0.988667	0.996667	0.988	0.983	0.999	0.995333	0.986333	0.991667	0.993333	0.992333
370	1	0.999	0.994333	0.996333	0.994667	0.995667	0.999	0.988	0.988667	0.996667	0.988	0.983	0.999	0.995333	0.986333	0.991667	0.993333	0.992333
371	1	0.999	0.994333	0.996333	0.994667	0.995667	0.999	0.988	0.988333	0.996667	0.988	0.982667	0.999	0.995333	0.986333	0.991667	0.993333	0.992333
372	1	0.999	0.994333	0.996333	0.994667	0.995667	0.999	0.988	0.988333	0.996667	0.988	0.982667	0.999	0.995	0.986333	0.991667	0.993333	0.992333
373	1	0.999	0.994333	0.996333	0.994667	0.995333	0.999	0.988	0.988333	0.996667	0.988	0.982667	0.999	0.995	0.986	0.991667	0.993333	0.992333
374	1	0.999	0.994333	0.996333	0.994667	0.995333	0.999	0.988	0.988333	0.996667	0.987667	0.982667	0.999	0.995	0.986	0.991667	0.993333	0.992333
375	1	0.999	0.994333	0.996333	0.994667	0.995333	0.999	0.987667	0.988333	0.996667	0.987667	0.982667	0.999	0.995	0.986	0.991667	0.993333	0.992333
376	1	0.999	0.994333	0.996333	0.994667	0.995333	0.999	0.987667	0.988333	0.996667	0.987667	0.982667	0.999	0.995	0.986	0.991667	0.993333	0.992333
377	1	0.999	0.994333	0.996333	0.994667	0.995333	0.998667	0.987667	0.988	0.996667	0.987667	0.982333	0.999	0.995	0.986	0.991667	0.993333	0.992333
378	1	0.999	0.994333	0.996	0.994667	0.995333	0.998667	0.987667	0.988	0.996333	0.987667	0.982333	0.999	0.995	0.985667	0.991667	0.993333	0.992
379	1	0.999	0.994333	0.996	0.994333	0.995333	0.998667	0.987667	0.988	0.996333	0.987667	0.982333	0.999	0.995	0.985667	0.991667	0.993333	0.992
380	1	0.999	0.994333	0.996	0.994333	0.995333	0.998667	0.987667	0.988	0.996333	0.987333	0.982333	0.999	0.995	0.985667	0.991667	0.993333	0.992
381	1	0.999	0.994333	0.996	0.994333	0.995333	0.998667	0.987333	0.988	0.996333	0.987333	0.982333	0.999	0.994667	0.985667	0.991667	0.993333	0.992
382	1	0.999	0.994	0.996	0.994333	0.995333	0.998667	0.987333	0.988	0.996333	0.987333	0.982	0.999	0.994667	0.985667	0.991333	0.993	0.992
384	1	0.999	0.994	0.996	0.994333	0.995333	0.998667	0.987333	0.988	0.996333	0.987333	0.982	0.999	0.994667	0.985667	0.991333	0.993	0.992
385	1	0.999	0.994	0.996	0.994333	0.995333	0.998667	0.987333	0.987667	0.996333	0.987333	0.982	0.999	0.994667	0.985333	0.991333	0.993	0.992
386	1	0.999	0.994	0.996	0.994333	0.995333	0.998667	0.987333	0.987667	0.996333	0.987333	0.982	0.999	0.994667	0.985333	0.991333	0.993	0.992
387	1	0.999	0.994	0.996	0.994	0.995333	0.998667	0.987333	0.987667	0.996333	0.987	0.982	0.999	0.994667	0.985333	0.991333	0.993	0.992
388	1	0.999	0.994	0.996	0.994	0.995333	0.998667	0.987	0.987667	0.996333	0.987	0.981667	0.999	0.994667	0.985333	0.991333	0.993	0.992
389	1	0.999	0.994	0.996	0.994	0.995333	0.998667	0.987	0.987667	0.996333	0.987	0.981667	0.999	0.994333	0.985333	0.991333	0.993	0.992
390	1	0.999	0.994	0.995667	0.994	0.995333	0.998667	0.987	0.987667	0.996333	0.987	0.981667	0.999	0.994333	0.985333	0.991333	0.993	0.992
391	1	0.999	0.993667	0.995667	0.994	0.995333	0.998667	0.987	0.987667	0.996333	0.987	0.981667	0.999	0.994333	0.985	0.991333	0.993	0.991667
392	1	0.999	0.993667	0.995667	0.994	0.995	0.998667	0.987	0.987333	0.996333	0.987	0.981333	0.999	0.994333	0.985	0.991333	0.993	0.991667
393	1	0.999	0.993667	0.995667	0.994	0.995	0.998667	0.987	0.987333	0.996333	0.986667	0.981333	0.999	0.994333	0.985	0.991333	0.993	0.991667
394	1	0.999	0.993667	0.995667	0.994	0.995	0.998667	0.986667	0.987333	0.996333	0.986667	0.981333	0.999	0.994333	0.985	0.991	0.992667	0.991667
395	1	0.999	0.993667	0.995667	0.994	0.995	0.998667	0.986667	0.987333	0.996	0.986667	0.981333	0.999	0.994333	0.985	0.991	0.992667	0.991667
396	1	0.999	0.993667	0.995667	0.994	0.995	0.998667	0.986667	0.987333	0.996	0.986667	0.981	0.998667	0.994333	0.984667	0.991	0.992667	0.991667
397	1	0.999	0.993667	0.995667	0.993667	0.995	0.998667	0.986667	0.987	0.996	0.986667	0.981	0.998667	0.994333	0.984667	0.991	0.992667	0.991667
398	1	0.998667	0.993667	0.995667	0.993667	0.995	0.998667	0.986667	0.987	0.996	0.986667	0.981	0.998667	0.994	0.984667	0.991	0.992667	0.991667
399	1	0.998667	0.993667	0.995667	0.993667	0.995	0.998667	0.986667	0.987	0.996	0.986333	0.981	0.998667	0.994	0.984667	0.991	0.992667	0.991667
400	1	0.998667	0.993667	0.995667	0.993667	0.995	0.998667	0.986667	0.987	0.996	0.986333	0.981	0.998667	0.994	0.984333	0.991	0.992667	0.991333
401	1	0.998667	0.993667	0.995667	0.993667	0.995	0.998667	0.986333	0.987	0.996	0.986333	0.980667	0.998667	0.994	0.984333	0.991	0.992667	0.991333
402	1	0.998667	0.993667	0.995667	0.993667	0.995	0.998667	0.986333	0.986667	0.996	0.986333	0.980667	0.998667	0.994	0.984333	0.991	0.992667	0.991333
403	1	0.998667	0.993667	0.995667	0.993667	0.994667	0.998667	0.986333	0.986667	0.996	0.986333	0.980667	0.998667	0.994	0.984333	0.991	0.992667	0.991333
404	1	0.998667	0.993667	0.995667	0.993667	0.994667	0.998667	0.986333	0.986667	0.996	0.986333	0.980667	0.998667	0.994	0.984333	0.990667	0.992333	0.991333
405	1	0.998667	0.993667	0.995667	0.993667	0.994667	0.998667	0.986333	0.986667	0.995667	0.986	0.980333	0.998667	0.994	0.984333	0.990667	0.992333	0.991333
406	1	0.998667	0.993333	0.995667	0.993667	0.994667	0.998667	0.986	0.986333	0.995667	0.986	0.980333	0.998667	0.994	0.984	0.990667	0.992333	0.991333
407	1	0.998667	0.993333	0.995667	0.993667	0.994667	0.998667	0.986	0.986333	0.995667	0.986	0.980333	0.998667	0.994	0.984	0.990667	0.992333	0.991333
408	1	0.998667	0.993333	0.995667	0.993667	0.994667	0.998667	0.986	0.986333	0.995667	0.986	0.980333	0.998667	0.994	0.984	0.990667	0.992333	0.991
409	1	0.998667	0.993333	0.995667	0.993333	0.994667	0.998667	0.986	0.986333	0.995667	0.986	0.980333	0.998667	0.993667	0.984	0.990667	0.992333	0.991
410	1	0.998667	0.993333	0.995667	0.993333	0.994667	0.998667	0.986	0.986333	0.995667	0.986	0.98	0.998667	0.993667	0.984	0.990667	0.992333	0.991
411	1	0.998667	0.993333	0.995667	0.993333	0.994667	0.998667	0.986	0.986	0.995667	0.986	0.98	0.998667	0.993667	0.983667	0.990667	0.992	0.991
412	1	0.998667	0.993333	0.995333	0.993333	0.994667	0.998667	0.986	0.986	0.995667	0.986	0.98	0.998667	0.993667	0.983667	0.990667	0.992	0.991
413	1	0.998667	0.993333	0.995333	0.993333	0.994667	0.998667	0.985667	0.986	0.995333	0.985667	0.98	0.998667	0.993667	0.983667	0.990333	0.992	0.991
414	1	0.998667	0.993333	0.995333	0.993333	0.994667	0.998667	0.985667	0.986	0.995333	0.985667	0.98	0.998667	0.993667	0.983667	0.990333	0.992	0.990667
415	1	0.998667	0.993333	0.995333	0.993333	0.994667	0.998667	0.985667	0.986	0.995333	0.985667	0.98	0.998667	0.993667	0.983667	0.990333	0.992	0.990667
416	1	0.998667	0.993	0.995333	0.993333	0.994667	0.998667	0.985667	0.985667	0.995333	0.985667	0.979667	0.998667	0.993667	0.983333	0.990333	0.992	0.990667
417	1	0.998667	0.993	0.995333	0.993333	0.994667	0.998667	0.985667	0.985667	0.995333	0.985667	0.979667	0.998667	0.993667	0.983333	0.990333	0.992	0.990667
418	1	0.998667	0.993	0.995333	0.993333	0.994667	0.998667	0.985667	0.985667	0.995333	0.985333	0.979667	0.998667	0.993667	0.983333	0.990333	0.991667	0.990667
419	1	0.998667	0.993	0.995333	0.993	0.994667	0.998667	0.985667	0.985667	0.995333	0.985333	0.979667	0.998667	0.993667	0.983333	0.990333	0.991667	0.990667
420	1	0.998667	0.993	0.995333	0.993	0.994667	0.998667	0.985333	0.985667	0.995333	0.985333	0.979667	0.998667	0.993333	0.983333	0.990333	0.991667	0.990667
421	1	0.998667	0.993	0.995333	0.993	0.994667	0.998667	0.985333	0.985333	0.995333	0.985333	0.979333	0.998667	0.993333	0.983	0.990333	0.991667	0.990667
422	1	0.998667	0.993	0.995333	0.993	0.994667	0.998667	0.985333	0.985333	0.995333	0.985333	0.979333	0.998667	0.993333	0.983	0.990333	0.991667	0.990333
423	1	0.998667	0.993	0.995	0.993	0.994667	0.998667	0.985333	0.985333	0.995	0.985	0.979333	0.998667	0.993333	0.983	0.990333	0.991667	0.990333
424	1	0.998667	0.993	0.995	0.993	0.994667	0.998667	0.985333	0.985333	0.995	0.985	0.979333	0.998667	0.993333	0.983	0.990333	0.991667	0.990333
425	0.999667	0.998667	0.993	0.995	0.993	0.994667	0.998667	0.985333	0.985333	0.995	0.985	0.979	0.998667	0.993333	0.983	0.990333	0.991667	0.990333
426	0.999667	0.998667	0.993	0.995	0.993	0.994667	0.998333	0.985	0.985	0.995	0.985	0.979	0.998667	0.993333	0.983	0.990333	0.991667	0.990333
427	0.999667	0.998333	0.993	0.995	0.993	0.994667	0.998333	0.985	0.985	0.995	0.985	0.979	0.998667	0.993333	0.982667	0.990333	0.991667	0.990333
428	0.999667	0.998333	0.993	0.995	0.993	0.994667	0.998333	0.985	0.985	0.995	0.984667	0.979	0.998667	0.993333	0.982667	0.990333	0.991333	0.990333
429	0.999667	0.998333	0.993	0.995	0.993	0.994333	0.998333	0.985	0.985	0.995	0.984667	0.979	0.998667	0.993333	0.982667	0.990333	0.991333	0.990333
430	0.999667	0.998333	0.992667	0.995	0.993	0.994333	0.998333	0.985	0.985	0.995	0.984667	0.978667	0.998667	0.993333	0.982667	0.99	0.991333	0.990333
431	0.999667	0.998333	0.992667	0.995	0.993	0.994333	0.998333	0.985	0.984667	0.995	0.984667	0.978667	0.998667	0.993	0.982667	0.99	0.991333	0.990333
432	0.999667	0.998333	0.992667	0.995	0.993	0.994333	0.998333	0.984667	0.984667	0.995	0.984667	0.978667	0.998667	0.993	0.982667	0.99	0.991333	0.99
433	0.999667	0.998333	0.992667	0.995	0.993	0.994333	0.998333	0.984667	0.984667	0.995	0.984667	0.978667	0.998667	0.993	0.982333	0.99	0.991333	0.99
434	0.999667	0.998333	0.992667	0.994667	0.992667	0.994333	0.998333	0.984667	0.984667	0.995	0.984333	0.978667	0.998333	0.993	0.982333	0.99	0.991333	0.99
435	0.999667	0.998333	0.992667	0.994667	0.992667	0.994333	0.998333	0.984667	0.984667	0.994667	0.984333	0.978333	0.998333	0.993	0.982333	0.99	0.991333	0.99
436	0.999667	0.998333	0.992667	0.994667	0.992667	0.994333	0.998333	0.984667	0.984333	0.994667	0.984333	0.978333	0.998333	0.993	0.982333	0.99	0.991333	0.99
437	0.999667	0.998333	0.992667	0.994667	0.992667	0.994333	0.998333	0.984667	0.984333	0.994667	0.984333	0.978333	0.998333	0.993	0.982333	0.99	0.991333	0.99
438	0.999667	0.998333	0.992667	0.994667	0.992667	0.994333	0.998333	0.984333	0.984333	0.994667	0.984333	0.978	0.998333	0.993	0.982	0.99	0.991333	0.99
439	0.999667	0.998333	0.992667	0.994667	0.992667	0.994	0.998333	0.984333	0.984	0.994667	0.984333	0.978	0.998333	0.993	0.982	0.989667	0.991333	0.989667
440	0.999667	0.998	0.992667	0.994667	0.992667	0.994	0.998333	0.984333	0.984	0.994667	0.984	0.978	0.998333	0.993	0.982	0.989667	0.991333	0.989667
441	0.999667	0.998	0.992667	0.994667	0.992667	0.994	0.998333	0.984333	0.984	0.994667	0.984	0.978	0.998333	0.993	0.982	0.989667	0.991333	0.989667
442	0.999667	0.998	0.992333	0.994667	0.992667	0.994	0.998333	0.984333	0.984	0.994333	0.984	0.978	0.998333	0.993	0.982	0.989667	0.991	0.989667
444	0.999667	0.998	0.992333	0.994667	0.992667	0.994	0.998333	0.984	0.984	0.994333	0.984	0.977667	0.998333	0.993	0.981667	0.989667	0.991	0.989667
444	0.999667	0.998	0.992333	0.994667	0.992667	0.994	0.998333	0.984	0.983667	0.994333	0.984	0.977667	0.998333	0.992667	0.981667	0.989667	0.991	0.989667
445	0.999667	0.998	0.992333	0.994667	0.992667	0.994	0.998333	0.984	0.983667	0.994333	0.983667	0.977667	0.998333	0.992667	0.981667	0.989667	0.991	0.989333
446	0.999667	0.998	0.992333	0.994667	0.992333	0.994	0.998333	0.984	0.983667	0.994333	0.983667	0.977667	0.998333	0.992667	0.981667	0.989667	0.991	0.989333
447	0.999667	0.998	0.992333	0.994667	0.992333	0.994	0.998333	0.984	0.983667	0.994333	0.983667	0.977333	0.998333	0.992667	0.981333	0.989667	0.991	0.989333
448	0.999667	0.998	0.992333	0.994667	0.992333	0.994	0.998333	0.983667	0.983333	0.994333	0.983667	0.977333	0.998333	0.992667	0.981333	0.989667	0.991	0.989333
449	0.999667	0.998	0.992333	0.994667	0.992333	0.994	0.998333	0.983667	0.983333	0.994	0.983667	0.977333	0.998333	0.992667	0.981333	0.989333	0.991	0.989333
451	0.999667	0.998	0.992333	0.994667	0.992333	0.994	0.998333	0.983667	0.983333	0.994	0.983667	0.977333	0.998333	0.992667	0.981333	0.989333	0.990667	0.989333
451	0.999667	0.998	0.992333	0.994333	0.992333	0.994	0.998333	0.983667	0.983333	0.994	0.983333	0.977333	0.998333	0.992667	0.981	0.989333	0.990667	0.989333
453	0.999667	0.998	0.992333	0.994333	0.992333	0.993667	0.998333	0.983667	0.983333	0.994	0.983333	0.977	0.998333	0.992333	0.981	0.989333	0.990667	0.989333
454	0.999667	0.998	0.992333	0.994333	0.992333	0.993667	0.998333	0.983333	0.983333	0.994	0.983333	0.977	0.998333	0.992333	0.981	0.989333	0.990667	0.989333
455	0.999667	0.998	0.992333	0.994333	0.992333	0.993667	0.998333	0.983333	0.983	0.994	0.983333	0.977	0.998	0.992333	0.981	0.989333	0.990667	0.989
456	0.999667	0.998	0.992333	0.994333	0.992333	0.993667	0.998333	0.983333	0.983	0.994	0.983333	0.977	0.998	0.992333	0.981	0.989333	0.990667	0.989
457	0.999667	0.998	0.992	0.994333	0.992333	0.993667	0.998333	0.983333	0.983	0.994	0.983333	0.977	0.998	0.992333	0.980667	0.989333	0.990667	0.989
458	0.999667	0.998	0.992	0.994333	0.992333	0.993667	0.998333	0.983333	0.983	0.994	0.983	0.977	0.998	0.992333	0.980667	0.989333	0.990333	0.989
459	0.999667	0.998	0.992	0.994333	0.992333	0.993667	0.998333	0.983333	0.983	0.994	0.983	0.976667	0.998	0.992	0.980667	0.989	0.990333	0.989
460	0.999667	0.998	0.992	0.994333	0.992	0.993667	0.998333	0.983	0.983	0.994	0.983	0.976667	0.998	0.992	0.980667	0.989	0.990333	0.989
461	0.999667	0.998	0.992	0.994	0.992	0.993667	0.998333	0.983	0.982667	0.994	0.983	0.976667	0.998	0.992	0.980667	0.989	0.990333	0.988667
462	0.999667	0.998	0.992	0.994	0.992	0.993667	0.998333	0.983	0.982667	0.993667	0.983	0.976667	0.998	0.992	0.980667	0.989	0.990333	0.988667
463	0.999667	0.998	0.992	0.994	0.992	0.993667	0.998333	0.983	0.982667	0.993667	0.982667	0.976667	0.998	0.992	0.980333	0.989	0.990333	0.988667
464	0.999667	0.998	0.992	0.994	0.992	0.993333	0.998333	0.983	0.982667	0.993667	0.982667	0.976667	0.998	0.992	0.980333	0.989	0.990333	0.988667
465	0.999667	0.998	0.992	0.994	0.992	0.993333	0.998333	0.983	0.982667	0.993667	0.982667	0.976333	0.998	0.991667	0.980333	0.989	0.990333	0.988333
466	0.999667	0.998	0.992	0.994	0.992	0.993333	0.998333	0.982667	0.982333	0.993667	0.982667	0.976333	0.998	0.991667	0.980333	0.989	0.990333	0.988333
467	0.999667	0.998	0.992	0.994	0.991667	0.993333	0.998333	0.982667	0.982333	0.993667	0.982333	0.976333	0.998	0.991667	0.98	0.989	0.99	0.988333
468	0.999667	0.998	0.992	0.994	0.991667	0.993333	0.998333	0.982667	0.982333	0.993667	0.982333	0.976333	0.998	0.991667	0.98	0.988667	0.99	0.988333
469	0.999667	0.998	0.992	0.994	0.991667	0.993333	0.998333	0.982667	0.982333	0.993667	0.982333	0.976333	0.998	0.991667	0.98	0.988667	0.99	0.988333
470	0.999667	0.998	0.992	0.994	0.991667	0.993333	0.998333	0.982667	0.982333	0.993667	0.982333	0.976	0.998	0.991667	0.98	0.988667	0.99	0.988333
471	0.999333	0.998	0.992	0.994	0.991667	0.993333	0.998333	0.982333	0.982333	0.993667	0.982333	0.976	0.998	0.991667	0.98	0.988667	0.99	0.988
472	0.999333	0.998	0.992	0.994	0.991667	0.993333	0.998333	0.982333	0.982333	0.993667	0.982333	0.976	0.998	0.991667	0.98	0.988667	0.99	0.988
473	0.999333	0.998	0.992	0.994	0.991667	0.993333	0.998333	0.982333	0.982333	0.993667	0.982	0.976	0.998	0.991333	0.979667	0.988667	0.99	0.988
474	0.999333	0.998	0.992	0.993667	0.991333	0.993333	0.998333	0.982333	0.982	0.993667	0.982	0.976	0.998	0.991333	0.979667	0.988667	0.99	0.988
475	0.999333	0.998	0.992	0.993667	0.991333	0.993333	0.998333	0.982333	0.982	0.993667	0.982	0.975667	0.998	0.991333	0.979667	0.988333	0.99	0.988
476	0.999333	0.998	0.992	0.993667	0.991333	0.993	0.998333	0.982333	0.982	0.993667	0.982	0.975667	0.998	0.991333	0.979667	0.988333	0.99	0.988
477	0.999333	0.998	0.992	0.993667	0.991333	0.993	0.998	0.982333	0.982	0.993333	0.982	0.975667	0.998	0.991333	0.979667	0.988333	0.989667	0.988
478	0.999333	0.998	0.992	0.993667	0.991333	0.993	0.998	0.982	0.982	0.993333	0.982	0.975333	0.998	0.991333	0.979667	0.988333	0.989667	0.988
479	0.999333	0.998	0.992	0.993667	0.991333	0.993	0.998	0.982	0.982	0.993333	0.982	0.975333	0.997667	0.991333	0.979333	0.988333	0.989667	0.988
480	0.999333	0.998	0.992	0.993667	0.991333	0.993	0.998	0.982	0.981667	0.993333	0.981667	0.975333	0.997667	0.991333	0.979333	0.988333	0.989667	0.988
481	0.999333	0.998	0.992	0.993667	0.991333	0.993	0.998	0.982	0.981667	0.993333	0.981667	0.975333	0.997667	0.991333	0.979333	0.988333	0.989667	0.988
482	0.999333	0.998	0.991667	0.993667	0.991333	0.993	0.998	0.982	0.981667	0.993333	0.981667	0.975333	0.997667	0.991	0.979333	0.988333	0.989667	0.988
483	0.999333	0.998	0.991667	0.993667	0.991	0.993	0.998	0.982	0.981667	0.993333	0.981667	0.975	0.997667	0.991	0.979	0.988	0.989667	0.987667
484	0.999333	0.997667	0.991667	0.993667	0.991	0.993	0.998	0.982	0.981667	0.993	0.981667	0.975	0.997667	0.991	0.979	0.988	0.989333	0.987667
485	0.999333	0.997667	0.991667	0.993333	0.991	0.993	0.998	0.981667	0.981333	0.993	0.981667	0.975	0.997667	0.991	0.979	0.988	0.989333	0.987667
486	0.999333	0.997667	0.991667	0.993333	0.991	0.993	0.998	0.981667	0.981333	0.993	0.981333	0.975	0.997667	0.991	0.979	0.988	0.989333	0.987667
487	0.999333	0.997667	0.991667	0.993333	0.991	0.993	0.998	0.981667	0.981333	0.993	0.981333	0.974667	0.997667	0.991	0.979	0.988	0.989333	0.987667
488	0.999333	0.997667	0.991667	0.993333	0.991	0.993	0.997667	0.981667	0.981333	0.993	0.981333	0.974667	0.997667	0.991	0.978667	0.988	0.989333	0.987667
489	0.999333	0.997667	0.991667	0.993333	0.991	0.993	0.997667	0.981667	0.981	0.993	0.981333	0.974667	0.997667	0.991	0.978667	0.988	0.989333	0.987667
490	0.999333	0.997667	0.991667	0.993333	0.991	0.992667	0.997667	0.981333	0.981	0.992667	0.981333	0.974667	0.997667	0.990667	0.978667	0.988	0.989333	0.987667
491	0.999333	0.997667	0.991333	0.993333	0.991	0.992667	0.997667	0.981333	0.981	0.992667	0.981	0.974667	0.997667	0.990667	0.978667	0.988	0.989	0.987333
492	0.999333	0.997667	0.991333	0.993333	0.990667	0.992667	0.997667	0.981333	0.981	0.992667	0.981	0.974667	0.997667	0.990667	0.978667	0.987667	0.989	0.987333
493	0.999333	0.997667	0.991333	0.993333	0.990667	0.992667	0.997667	0.981333	0.981	0.992667	0.981	0.974333	0.997667	0.990667	0.978333	0.987667	0.989	0.987333
494	0.999333	0.997667	0.991333	0.993333	0.990667	0.992667	0.997667	0.981333	0.980667	0.992667	0.981	0.974333	0.997667	0.990667	0.978333	0.987667	0.989	0.987333
495	0.999333	0.997667	0.991333	0.993333	0.990667	0.992667	0.997667	0.981333	0.980667	0.992667	0.981	0.974333	0.997667	0.990667	0.978333	0.987667	0.989	0.987333
496	0.999333	0.997667	0.991333	0.993333	0.990667	0.992667	0.997667	0.981	0.980667	0.992667	0.981	0.974333	0.997667	0.990667	0.978333	0.987667	0.989	0.987333
497	0.999333	0.997667	0.991333	0.993333	0.990667	0.992667	0.997667	0.981	0.980667	0.992667	0.980667	0.974333	0.997667	0.990333	0.978	0.987667	0.989	0.987
498	0.999333	0.997667	0.991333	0.993333	0.990667	0.992667	0.997333	0.981	0.980667	0.992333	0.980667	0.974	0.997667	0.990333	0.978	0.987667	0.988667	0.987
499	0.999333	0.997667	0.991333	0.993333	0.990667	0.992667	0.997333	0.981	0.980667	0.992333	0.980667	0.974	0.997333	0.990333	0.978	0.987333	0.988667	0.987
500	0.999333	0.997667	0.991333	0.993333	0.990333	0.992667	0.997333	0.981	0.980333	0.992333	0.980667	0.974	0.997333	0.990333	0.978	0.987333	0.988667	0.987
501	0.999333	0.997667	0.991333	0.993	0.990333	0.992667	0.997333	0.981	0.980333	0.992333	0.980667	0.974	0.997333	0.990333	0.978	0.987333	0.988667	0.987
502	0.999333	0.997667	0.991333	0.993	0.990333	0.992667	0.997333	0.980667	0.980333	0.992333	0.980333	0.974	0.997333	0.990333	0.977667	0.987333	0.988667	0.986667
503	0.999333	0.997667	0.991333	0.993	0.990333	0.992667	0.997333	0.980667	0.980333	0.992333	0.980333	0.974	0.997333	0.990333	0.977667	0.987333	0.988667	0.986667
504	0.999333	0.997667	0.991333	0.993	0.990333	0.992667	0.997333	0.980667	0.980333	0.992333	0.980333	0.973667	0.997333	0.99	0.977667	0.987333	0.988667	0.986667
505	0.999333	0.997667	0.991333	0.993	0.990333	0.992667	0.997333	0.980667	0.98	0.992333	0.980333	0.973667	0.997333	0.99	0.977667	0.987333	0.988667	0.986667
506	0.999333	0.997667	0.991	0.993	0.990333	0.992333	0.997333	0.980667	0.98	0.992333	0.980333	0.973667	0.997333	0.99	0.977667	0.987	0.988667	0.986667
507	0.999333	0.997667	0.991	0.993	0.990333	0.992333	0.997333	0.980667	0.98	0.992333	0.980333	0.973667	0.997	0.99	0.977333	0.987	0.988667	0.986667
508	0.999333	0.997667	0.991	0.993	0.990333	0.992333	0.997333	0.980333	0.98	0.992333	0.980333	0.973667	0.997	0.99	0.977333	0.987	0.988333	0.986333
509	0.999333	0.997667	0.991	0.993	0.990333	0.992333	0.997333	0.980333	0.98	0.992333	0.98	0.973667	0.997	0.99	0.977333	0.987	0.988333	0.986333
510	0.999333	0.997667	0.991	0.992667	0.990333	0.992333	0.997333	0.980333	0.98	0.992333	0.98	0.973333	0.997	0.99	0.977333	0.987	0.988333	0.986333
511	0.999333	0.997667	0.991	0.992667	0.990333	0.992333	0.997333	0.980333	0.979667	0.992	0.98	0.973333	0.997	0.99	0.977333	0.987	0.988333	0.986333
512	0.999333	0.997667	0.991	0.992667	0.990333	0.992333	0.997333	0.980333	0.979667	0.992	0.98	0.973333	0.997	0.99	0.977	0.987	0.988333	0.986333
513	0.999333	0.997667	0.991	0.992667	0.99	0.992333	0.997333	0.98	0.979667	0.992	0.98	0.973333	0.997	0.99	0.977	0.987	0.988333	0.986333
514	0.999333	0.997667	0.991	0.992667	0.99	0.992333	0.997333	0.98	0.979667	0.992	0.98	0.973	0.997	0.99	0.977	0.986667	0.988333	0.986333
515	0.999333	0.997667	0.991	0.992667	0.99	0.992333	0.997333	0.98	0.979667	0.992	0.98	0.973	0.997	0.989667	0.977	0.986667	0.988333	0.986333
516	0.999333	0.997667	0.991	0.992667	0.99	0.992	0.997333	0.98	0.979333	0.992	0.98	0.973	0.997	0.989667	0.977	0.986667	0.988	0.986333
517	0.999333	0.997667	0.991	0.992667	0.99	0.992	0.997333	0.98	0.979333	0.991667	0.98	0.973	0.997	0.989667	0.976667	0.986667	0.988	0.986
518	0.999333	0.997667	0.990667	0.992667	0.99	0.992	0.997333	0.98	0.979333	0.991667	0.98	0.973	0.997	0.989667	0.976667	0.986667	0.988	0.986
519	0.999333	0.997667	0.990667	0.992667	0.99	0.992	0.997333	0.979667	0.979333	0.991667	0.979667	0.972667	0.997	0.989667	0.976667	0.986667	0.988	0.986
520	0.999333	0.997667	0.990667	0.992667	0.989667	0.992	0.997	0.979667	0.979333	0.991667	0.979667	0.972667	0.997	0.989667	0.976667	0.986667	0.988	0.986
521	0.999333	0.997667	0.990667	0.992667	0.989667	0.992	0.997	0.979667	0.979	0.991667	0.979667	0.972667	0.997	0.989667	0.976667	0.986667	0.988	0.986
522	0.999333	0.997667	0.990667	0.992667	0.989667	0.992	0.997	0.979667	0.979	0.991667	0.979667	0.972667	0.996667	0.989667	0.976333	0.986333	0.988	0.986
524	0.999333	0.997667	0.990667	0.992667	0.989667	0.992	0.997	0.979667	0.979	0.991667	0.979667	0.972667	0.996667	0.989333	0.976333	0.986333	0.987667	0.986
525	0.999333	0.997667	0.990667	0.992333	0.989667	0.992	0.997	0.979667	0.979	0.991667	0.979667	0.972333	0.996667	0.989333	0.976333	0.986333	0.987667	0.985667
526	0.999333	0.997667	0.990667	0.992333	0.989667	0.992	0.997	0.979333	0.979	0.991333	0.979667	0.972333	0.996667	0.989333	0.976333	0.986333	0.987667	0.985667
527	0.999333	0.997667	0.990667	0.992333	0.989333	0.992	0.997	0.979333	0.978667	0.991333	0.979333	0.972333	0.996667	0.989333	0.976333	0.986333	0.987667	0.985667
528	0.999333	0.997667	0.990667	0.992333	0.989333	0.992	0.997	0.979333	0.978667	0.991333	0.979333	0.972333	0.996667	0.989333	0.976	0.986333	0.987667	0.985667
529	0.999333	0.997667	0.990667	0.992333	0.989333	0.992	0.997	0.979333	0.978667	0.991333	0.979333	0.972333	0.996667	0.989333	0.976	0.986333	0.987667	0.985667
530	0.999	0.997667	0.990333	0.992333	0.989333	0.991667	0.997	0.979333	0.978333	0.991333	0.979333	0.972333	0.996667	0.989333	0.976	0.986	0.987333	0.985667
531	0.999	0.997667	0.990333	0.992333	0.989333	0.991667	0.997	0.979	0.978333	0.991333	0.979333	0.972	0.996667	0.989	0.976	0.986	0.987333	0.985667
532	0.999	0.997667	0.990333	0.992333	0.989333	0.991667	0.997	0.979	0.978333	0.991333	0.979333	0.972	0.996667	0.989	0.976	0.986	0.987333	0.985333
533	0.999	0.997667	0.990333	0.992333	0.989333	0.991667	0.997	0.979	0.978	0.991333	0.979	0.972	0.996667	0.989	0.975667	0.986	0.987333	0.985333
534	0.999	0.997667	0.990333	0.992333	0.989333	0.991667	0.997	0.979	0.978	0.991333	0.979	0.972	0.996667	0.989	0.975667	0.986	0.987333	0.985333
535	0.999	0.997667	0.990333	0.992333	0.989	0.991667	0.997	0.979	0.978	0.991	0.979	0.971667	0.996667	0.989	0.975667	0.986	0.987333	0.985333
536	0.999	0.997667	0.990333	0.992333	0.989	0.991667	0.997	0.979	0.978	0.991	0.979	0.971667	0.996667	0.989	0.975667	0.985667	0.987333	0.985333
537	0.999	0.997667	0.990333	0.992333	0.989	0.991667	0.997	0.978667	0.977667	0.991	0.979	0.971667	0.996667	0.988667	0.975667	0.985667	0.987	0.985333
538	0.999	0.997333	0.99	0.992333	0.989	0.991667	0.996667	0.978667	0.977667	0.991	0.979	0.971667	0.996667	0.988667	0.975333	0.985667	0.987	0.985333
539	0.999	0.997333	0.99	0.992333	0.989	0.991667	0.996667	0.978667	0.977667	0.991	0.978667	0.971667	0.996667	0.988667	0.975333	0.985667	0.987	0.985
540	0.999	0.997333	0.99	0.992333	0.989	0.991667	0.996667	0.978667	0.977667	0.991	0.978667	0.971333	0.996667	0.988667	0.975333	0.985667	0.987	0.985
541	0.999	0.997333	0.99	0.992333	0.989	0.991667	0.996667	0.978667	0.977333	0.991	0.978667	0.971333	0.996667	0.988667	0.975333	0.985667	0.987	0.985
542	0.999	0.997333	0.99	0.992333	0.989	0.991333	0.996667	0.978667	0.977333	0.991	0.978667	0.971333	0.996667	0.988333	0.975333	0.985333	0.987	0.985
543	0.999	0.997333	0.99	0.992	0.989	0.991333	0.996667	0.978333	0.977333	0.990667	0.978667	0.971333	0.996667	0.988333	0.975	0.985333	0.987	0.985
544	0.999	0.997333	0.99	0.992	0.989	0.991333	0.996667	0.978333	0.977333	0.990667	0.978667	0.971333	0.996667	0.988333	0.975	0.985333	0.987	0.985
545	0.999	0.997333	0.99	0.992	0.989	0.991333	0.996667	0.978333	0.977	0.990667	0.978333	0.971	0.996667	0.988333	0.975	0.985333	0.987	0.985
546	0.999	0.997333	0.99	0.992	0.988667	0.991333	0.996667	0.978333	0.977	0.990667	0.978333	0.971	0.996667	0.988333	0.975	0.985333	0.987	0.984667
547	0.999	0.997333	0.989667	0.992	0.988667	0.991333	0.996667	0.978333	0.977	0.990667	0.978333	0.971	0.996333	0.988333	0.974667	0.985	0.987	0.984667
548	0.999	0.997333	0.989667	0.992	0.988667	0.991333	0.996667	0.978333	0.977	0.990667	0.978333	0.971	0.996333	0.988333	0.974667	0.985	0.986667	0.984667
549	0.999	0.997333	0.989667	0.992	0.988667	0.991333	0.996667	0.978333	0.977	0.990333	0.978333	0.971	0.996333	0.988333	0.974667	0.985	0.986667	0.984667
550	0.999	0.997333	0.989667	0.992	0.988667	0.991333	0.996667	0.978	0.976667	0.990333	0.978	0.970667	0.996333	0.988	0.974667	0.985	0.986667	0.984667
551	0.999	0.997333	0.989667	0.992	0.988667	0.991333	0.996667	0.978	0.976667	0.990333	0.978	0.970667	0.996333	0.988	0.974667	0.985	0.986667	0.984333
552	0.999	0.997333	0.989667	0.992	0.988667	0.991333	0.996667	0.978	0.976667	0.990333	0.978	0.970667	0.996333	0.988	0.974667	0.985	0.986667	0.984333
553	0.999	0.997333	0.989667	0.991667	0.988667	0.991	0.996667	0.978	0.976667	0.990333	0.978	0.970667	0.996333	0.988	0.974333	0.984667	0.986667	0.984333
554	0.999	0.997333	0.989667	0.991667	0.988333	0.991	0.996667	0.978	0.976333	0.990333	0.978	0.970667	0.996333	0.988	0.974333	0.984667	0.986333	0.984333
555	0.999	0.997	0.989667	0.991667	0.988333	0.991	0.996667	0.978	0.976333	0.990333	0.977667	0.970667	0.996333	0.988	0.974333	0.984667	0.986333	0.984333
556	0.999	0.997	0.989333	0.991667	0.988333	0.991	0.996667	0.977667	0.976333	0.990333	0.977667	0.970333	0.996333	0.988	0.974333	0.984667	0.986333	0.984333
557	0.999	0.997	0.989333	0.991667	0.988333	0.991	0.996667	0.977667	0.976333	0.99	0.977667	0.970333	0.996333	0.987667	0.974333	0.984667	0.986333	0.984
558	0.999	0.997	0.989333	0.991667	0.988333	0.991	0.996667	0.977667	0.976	0.99	0.977667	0.970333	0.996333	0.987667	0.974	0.984667	0.986333	0.984
559	0.999	0.997	0.989333	0.991667	0.988333	0.991	0.996667	0.977667	0.976	0.99	0.977667	0.970333	0.996	0.987667	0.974	0.984667	0.986	0.984
560	0.999	0.997	0.989333	0.991667	0.988333	0.991	0.996667	0.977667	0.976	0.99	0.977667	0.970333	0.996	0.987667	0.974	0.984333	0.986	0.984
561	0.999	0.997	0.989333	0.991667	0.988	0.991	0.996667	0.977667	0.976	0.99	0.977333	0.97	0.996	0.987667	0.974	0.984333	0.986	0.984
562	0.999	0.997	0.989333	0.991667	0.988	0.991	0.996667	0.977667	0.976	0.99	0.977333	0.97	0.996	0.987333	0.973667	0.984333	0.986	0.984
563	0.999	0.997	0.989333	0.991667	0.988	0.991	0.996667	0.977333	0.975667	0.99	0.977333	0.97	0.996	0.987333	0.973667	0.984333	0.986	0.984
564	0.999	0.996667	0.989333	0.991667	0.988	0.991	0.996667	0.977333	0.975667	0.99	0.977333	0.97	0.996	0.987333	0.973667	0.984333	0.986	0.983667
565	0.999	0.996667	0.989	0.991667	0.988	0.991	0.996667	0.977333	0.975667	0.99	0.977333	0.969667	0.996	0.987333	0.973667	0.984333	0.985667	0.983667
566	0.999	0.996667	0.989	0.991333	0.988	0.991	0.996667	0.977333	0.975667	0.99	0.977	0.969667	0.996	0.987333	0.973667	0.984333	0.985667	0.983667
567	0.999	0.996667	0.989	0.991333	0.988	0.990667	0.996667	0.977333	0.975667	0.99	0.977	0.969667	0.996	0.987	0.973333	0.984	0.985667	0.983667
568	0.999	0.996667	0.989	0.991333	0.988	0.990667	0.996333	0.977333	0.975333	0.99	0.977	0.969667	0.996	0.987	0.973333	0.984	0.985667	0.983667
569	0.999	0.996667	0.989	0.991333	0.987667	0.990667	0.996333	0.977333	0.975333	0.99	0.977	0.969667	0.996	0.987	0.973333	0.984	0.985667	0.983667
570	0.999	0.996667	0.989	0.991333	0.987667	0.990667	0.996333	0.977333	0.975333	0.989667	0.977	0.969333	0.995667	0.987	0.973333	0.984	0.985667	0.983667
571	0.999	0.996667	0.989	0.991333	0.987667	0.990667	0.996333	0.977	0.975333	0.989667	0.976667	0.969333	0.995667	0.987	0.973	0.984	0.985333	0.983667
572	0.999	0.996667	0.989	0.991333	0.987667	0.990667	0.996333	0.977	0.975333	0.989667	0.976667	0.969333	0.995667	0.987	0.973	0.984	0.985333	0.983667
573	0.999	0.996667	0.989	0.991333	0.987667	0.990667	0.996333	0.977	0.975333	0.989667	0.976667	0.969333	0.995667	0.986667	0.973	0.983667	0.985333	0.983333
574	0.999	0.996667	0.989	0.991	0.987667	0.990667	0.996333	0.977	0.975	0.989667	0.976667	0.969333	0.995667	0.986667	0.973	0.983667	0.985333	0.983333
575	0.999	0.996667	0.989	0.991	0.987667	0.990667	0.996333	0.977	0.975	0.989667	0.976333	0.969	0.995667	0.986667	0.973	0.983667	0.985333	0.983333
576	0.999	0.996667	0.989	0.991	0.987667	0.990667	0.996333	0.977	0.975	0.989667	0.976333	0.969	0.995667	0.986667	0.972667	0.983667	0.985333	0.983333
577	0.999	0.996667	0.989	0.991	0.987667	0.990667	0.996333	0.976667	0.975	0.989667	0.976333	0.969	0.995667	0.986667	0.972667	0.983667	0.985333	0.983333
578	0.999	0.996667	0.989	0.991	0.987667	0.990667	0.996333	0.976667	0.975	0.989667	0.976333	0.969	0.995667	0.986667	0.972667	0.983667	0.985333	0.983333
579	0.999	0.996667	0.989	0.991	0.987333	0.990667	0.996333	0.976667	0.974667	0.989667	0.976333	0.969	0.995333	0.986667	0.972667	0.983667	0.985	0.983333
580	0.999	0.996667	0.989	0.990667	0.987333	0.990667	0.996333	0.976667	0.974667	0.989333	0.976333	0.968667	0.995333	0.986667	0.972333	0.983667	0.985	0.983333
581	0.999	0.996667	0.989	0.990667	0.987333	0.990667	0.996333	0.976667	0.974667	0.989333	0.976	0.968667	0.995333	0.986667	0.972333	0.983333	0.985	0.983
582	0.999	0.996667	0.989	0.990667	0.987333	0.990667	0.996333	0.976667	0.974667	0.989333	0.976	0.968667	0.995333	0.986667	0.972333	0.983333	0.985	0.983
583	0.999	0.996667	0.989	0.990667	0.987333	0.990333	0.996333	0.976333	0.974667	0.989333	0.976	0.968667	0.995333	0.986333	0.972333	0.983333	0.985	0.983
584	0.999	0.996667	0.989	0.990667	0.987333	0.990333	0.996333	0.976333	0.974667	0.989333	0.976	0.968667	0.995333	0.986333	0.972333	0.983333	0.985	0.983
585	0.999	0.996667	0.989	0.990667	0.987333	0.990333	0.996333	0.976333	0.974667	0.989333	0.976	0.968667	0.995333	0.986333	0.972333	0.983333	0.985	0.983
586	0.999	0.996333	0.988667	0.990667	0.987	0.990333	0.996333	0.976333	0.974333	0.989333	0.976	0.968333	0.995333	0.986333	0.972	0.983333	0.984667	0.983
587	0.999	0.996333	0.988667	0.990667	0.987	0.990333	0.996333	0.976333	0.974333	0.989	0.976	0.968333	0.995333	0.986333	0.972	0.983333	0.984667	0.983
588	0.999	0.996333	0.988667	0.990667	0.987	0.990333	0.996333	0.976333	0.974333	0.989	0.975667	0.968333	0.995333	0.986333	0.972	0.983333	0.984667	0.983
589	0.999	0.996333	0.988667	0.990667	0.987	0.990333	0.996333	0.976	0.974333	0.989	0.975667	0.968333	0.995333	0.986333	0.972	0.983333	0.984667	0.982667
590	0.999	0.996333	0.988667	0.990667	0.987	0.990333	0.996	0.976	0.974333	0.989	0.975667	0.968333	0.995333	0.986	0.972	0.983333	0.984667	0.982667
591	0.999	0.996333	0.988667	0.990667	0.987	0.990333	0.996	0.976	0.974333	0.989	0.975667	0.968	0.995333	0.986	0.971667	0.983333	0.984667	0.982667
592	0.999	0.996333	0.988667	0.990667	0.987	0.990333	0.996	0.976	0.974333	0.989	0.975667	0.968	0.995333	0.986	0.971667	0.983	0.984667	0.982667
593	0.999	0.996333	0.988667	0.990333	0.986667	0.990333	0.996	0.976	0.974333	0.988667	0.975667	0.968	0.995	0.986	0.971667	0.983	0.984333	0.982667
595	0.999	0.996333	0.988667	0.990333	0.986667	0.990333	0.996	0.976	0.974	0.988667	0.975667	0.968	0.995	0.986	0.971667	0.983	0.984333	0.982667
596	0.999	0.996333	0.988667	0.990333	0.986667	0.99	0.996	0.976	0.974	0.988667	0.975667	0.967667	0.995	0.986	0.971667	0.983	0.984333	0.982667
597	0.999	0.996333	0.988667	0.990333	0.986667	0.99	0.996	0.976	0.974	0.988667	0.975667	0.967667	0.995	0.985667	0.971667	0.983	0.984333	0.982667
598	0.999	0.996333	0.988667	0.990333	0.986667	0.99	0.996	0.975667	0.974	0.988667	0.975333	0.967667	0.995	0.985667	0.971333	0.983	0.984333	0.982333
599	0.999	0.996333	0.988667	0.990333	0.986667	0.99	0.996	0.975667	0.974	0.988667	0.975333	0.967667	0.995	0.985667	0.971333	0.982667	0.984333	0.982333
600	0.999	0.996333	0.988333	0.990333	0.986333	0.99	0.996	0.975667	0.973667	0.988667	0.975333	0.967667	0.995	0.985667	0.971333	0.982667	0.984	0.982333
601	0.999	0.996333	0.988333	0.990333	0.986333	0.99	0.996	0.975667	0.973667	0.988667	0.975333	0.967333	0.995	0.985667	0.971333	0.982667	0.984	0.982333
602	0.999	0.996333	0.988333	0.990333	0.986333	0.99	0.996	0.975667	0.973667	0.988667	0.975333	0.967333	0.995	0.985667	0.971333	0.982667	0.984	0.982333
603	0.999	0.996333	0.988333	0.990333	0.986333	0.99	0.996	0.975333	0.973667	0.988667	0.975333	0.967333	0.995	0.985667	0.971333	0.982667	0.984	0.982333
604	0.999	0.996333	0.988333	0.990333	0.986333	0.99	0.996	0.975333	0.973333	0.988667	0.975	0.967333	0.995	0.985667	0.971	0.982667	0.984	0.982333
605	0.999	0.996333	0.988333	0.99	0.986333	0.989667	0.996	0.975333	0.973333	0.988667	0.975	0.967333	0.995	0.985667	0.971	0.982333	0.984	0.982333
606	0.999	0.996333	0.988333	0.99	0.986	0.989667	0.996	0.975333	0.973333	0.988667	0.975	0.967333	0.994667	0.985333	0.971	0.982333	0.983667	0.982
607	0.999	0.996333	0.988333	0.99	0.986	0.989667	0.996	0.975333	0.973333	0.988667	0.975	0.967333	0.994667	0.985333	0.971	0.982333	0.983667	0.982
608	0.999	0.996333	0.988333	0.99	0.986	0.989667	0.996	0.975333	0.973333	0.988667	0.975	0.967	0.994667	0.985333	0.970667	0.982333	0.983667	0.982
609	0.999	0.996333	0.988333	0.99	0.986	0.989667	0.995667	0.975333	0.973	0.988667	0.974667	0.967	0.994667	0.985333	0.970667	0.982333	0.983667	0.982
610	0.999	0.996333	0.988333	0.99	0.986	0.989667	0.995667	0.975	0.973	0.988667	0.974667	0.967	0.994667	0.985333	0.970667	0.982333	0.983667	0.982
611	0.999	0.996333	0.988333	0.99	0.986	0.989667	0.995667	0.975	0.973	0.988667	0.974667	0.967	0.994667	0.985333	0.970667	0.982	0.983667	0.981667
612	0.999	0.996333	0.988333	0.99	0.986	0.989333	0.995667	0.975	0.973	0.988333	0.974667	0.967	0.994667	0.985333	0.970667	0.982	0.983667	0.981667
613	0.999	0.996333	0.988333	0.99	0.985667	0.989333	0.995667	0.975	0.973	0.988333	0.974667	0.967	0.994667	0.985	0.970667	0.982	0.983333	0.981667
614	0.999	0.996333	0.988333	0.99	0.985667	0.989333	0.995667	0.975	0.972667	0.988333	0.974333	0.966667	0.994667	0.985	0.970333	0.982	0.983333	0.981667
615	0.999	0.996333	0.988	0.99	0.985667	0.989333	0.995667	0.975	0.972667	0.988333	0.974333	0.966667	0.994333	0.985	0.970333	0.982	0.983333	0.981667
616	0.999	0.996	0.988	0.99	0.985667	0.989333	0.995667	0.975	0.972667	0.988333	0.974333	0.966667	0.994333	0.985	0.970333	0.982	0.983333	0.981333
617	0.999	0.996	0.988	0.99	0.985667	0.989333	0.995667	0.974667	0.972667	0.988333	0.974333	0.966667	0.994333	0.985	0.970333	0.982	0.983333	0.981333
618	0.999	0.996	0.988	0.99	0.985667	0.989333	0.995667	0.974667	0.972667	0.988333	0.974333	0.966667	0.994333	0.984667	0.970333	0.982	0.983333	0.981333
619	0.999	0.996	0.988	0.99	0.985667	0.989	0.995333	0.974667	0.972667	0.988333	0.974333	0.966333	0.994333	0.984667	0.97	0.981667	0.983333	0.981333
620	0.999	0.996	0.988	0.99	0.985667	0.989	0.995333	0.974667	0.972333	0.988	0.974	0.966333	0.994333	0.984667	0.97	0.981667	0.983	0.981333
621	0.999	0.996	0.988	0.99	0.985667	0.989	0.995333	0.974667	0.972333	0.988	0.974	0.966333	0.994333	0.984667	0.97	0.981667	0.983	0.981
622	0.999	0.996	0.988	0.99	0.985667	0.989	0.995333	0.974333	0.972333	0.988	0.974	0.966333	0.994	0.984667	0.97	0.981667	0.983	0.981
623	0.999	0.996	0.987667	0.99	0.985667	0.989	0.995333	0.974333	0.972333	0.988	0.974	0.966333	0.994	0.984667	0.97	0.981667	0.983	0.981
624	0.999	0.996	0.987667	0.989667	0.985667	0.989	0.995333	0.974333	0.972	0.988	0.974	0.966	0.994	0.984333	0.969667	0.981667	0.983	0.981
625	0.999	0.996	0.987667	0.989667	0.985333	0.989	0.995333	0.974333	0.972	0.988	0.974	0.966	0.994	0.984333	0.969667	0.981667	0.983	0.981
626	0.999	0.996	0.987667	0.989667	0.985333	0.989	0.995333	0.974333	0.972	0.987667	0.974	0.966	0.994	0.984333	0.969667	0.981333	0.982667	0.981
627	0.998667	0.996	0.987667	0.989667	0.985333	0.989	0.995333	0.974	0.972	0.987667	0.973667	0.966	0.994	0.984333	0.969667	0.981333	0.982667	0.980667
628	0.998667	0.996	0.987667	0.989667	0.985333	0.989	0.995	0.974	0.971667	0.987667	0.973667	0.966	0.994	0.984333	0.969667	0.981333	0.982667	0.980667
629	0.998667	0.996	0.987667	0.989667	0.985333	0.989	0.995	0.974	0.971667	0.987667	0.973667	0.965667	0.994	0.984333	0.969333	0.981333	0.982667	0.980667
630	0.998667	0.996	0.987667	0.989667	0.985333	0.989	0.995	0.974	0.971667	0.987667	0.973667	0.965667	0.994	0.984333	0.969333	0.981333	0.982667	0.980667
631	0.998667	0.996	0.987667	0.989667	0.985333	0.989	0.995	0.974	0.971667	0.987667	0.973667	0.965667	0.993667	0.984	0.969333	0.981333	0.982667	0.980667
632	0.998667	0.996	0.987667	0.989667	0.985333	0.989	0.995	0.974	0.971667	0.987667	0.973667	0.965667	0.993667	0.984	0.969333	0.981	0.982667	0.980667
633	0.998667	0.996	0.987667	0.989667	0.985	0.988667	0.995	0.974	0.971667	0.987667	0.973667	0.965667	0.993667	0.984	0.969333	0.981	0.982333	0.980333
634	0.998667	0.996	0.987333	0.989333	0.985	0.988667	0.995	0.973667	0.971333	0.987333	0.973333	0.965667	0.993667	0.984	0.969	0.981	0.982333	0.980333
635	0.998667	0.996	0.987333	0.989333	0.985	0.988667	0.995	0.973667	0.971333	0.987333	0.973333	0.965333	0.993667	0.984	0.969	0.981	0.982333	0.980333
636	0.998667	0.996	0.987333	0.989333	0.985	0.988667	0.995	0.973667	0.971333	0.987333	0.973333	0.965333	0.993667	0.984	0.969	0.981	0.982333	0.980333
637	0.998667	0.996	0.987333	0.989333	0.985	0.988667	0.995	0.973667	0.971333	0.987333	0.973333	0.965333	0.993667	0.984	0.969	0.981	0.982333	0.980333
638	0.998667	0.996	0.987333	0.989333	0.985	0.988667	0.995	0.973667	0.971333	0.987333	0.973333	0.965333	0.993667	0.983667	0.969	0.980667	0.982333	0.980333
639	0.998667	0.996	0.987333	0.989333	0.984667	0.988667	0.995	0.973667	0.971333	0.987333	0.973333	0.965333	0.993667	0.983667	0.968667	0.980667	0.982	0.98
640	0.998667	0.996	0.987333	0.989333	0.984667	0.988667	0.995	0.973333	0.971333	0.987333	0.973	0.965	0.993667	0.983667	0.968667	0.980667	0.982	0.98
641	0.998667	0.996	0.987333	0.989333	0.984667	0.988667	0.994667	0.973333	0.971	0.987333	0.973	0.965	0.993333	0.983667	0.968667	0.980667	0.982	0.98
642	0.998667	0.996	0.987333	0.989333	0.984667	0.988667	0.994667	0.973333	0.971	0.987	0.973	0.965	0.993333	0.983667	0.968667	0.980667	0.982	0.98
643	0.998667	0.996	0.987333	0.989333	0.984667	0.988667	0.994667	0.973333	0.971	0.987	0.973	0.965	0.993333	0.983667	0.968667	0.980667	0.982	0.98
644	0.998667	0.996	0.987333	0.989	0.984667	0.988667	0.994667	0.973333	0.971	0.987	0.973	0.964667	0.993333	0.983667	0.968667	0.980333	0.982	0.98
645	0.998667	0.996	0.987333	0.989	0.984667	0.988667	0.994667	0.973333	0.971	0.987	0.972667	0.964667	0.993333	0.983667	0.968333	0.980333	0.982	0.98
646	0.998667	0.996	0.987	0.989	0.984667	0.988667	0.994667	0.973	0.971	0.987	0.972667	0.964667	0.993333	0.983333	0.968333	0.980333	0.982	0.979667
647	0.998667	0.996	0.987	0.989	0.984333	0.988667	0.994667	0.973	0.970667	0.987	0.972667	0.964667	0.993333	0.983333	0.968333	0.980333	0.981667	0.979667
648	0.998667	0.996	0.987	0.989	0.984333	0.988667	0.994667	0.973	0.970667	0.987	0.972667	0.964667	0.993333	0.983333	0.968333	0.980333	0.981667	0.979667
649	0.998667	0.996	0.987	0.989	0.984333	0.988667	0.994667	0.973	0.970667	0.987	0.972667	0.964667	0.993333	0.983333	0.968333	0.980333	0.981667	0.979667
650	0.998667	0.996	0.987	0.989	0.984333	0.988667	0.994667	0.973	0.970667	0.986667	0.972667	0.964333	0.993	0.983333	0.968	0.980333	0.981667	0.979667
651	0.998667	0.996	0.987	0.989	0.984333	0.988333	0.994667	0.973	0.970667	0.986667	0.972333	0.964333	0.993	0.983333	0.968	0.980333	0.981667	0.979667
652	0.998667	0.996	0.987	0.989	0.984333	0.988333	0.994667	0.973	0.970333	0.986667	0.972333	0.964333	0.993	0.983333	0.968	0.98	0.981667	0.979333
653	0.998333	0.996	0.987	0.988667	0.984333	0.988333	0.994667	0.972667	0.970333	0.986667	0.972333	0.964333	0.993	0.983	0.968	0.98	0.981333	0.979333
655	0.998333	0.996	0.987	0.988667	0.984333	0.988333	0.994667	0.972667	0.970333	0.986667	0.972333	0.964333	0.993	0.983	0.968	0.98	0.981333	0.979333
655	0.998333	0.996	0.987	0.988667	0.984	0.988333	0.994667	0.972667	0.970333	0.986667	0.972333	0.964333	0.993	0.983	0.968	0.98	0.981333	0.979333
656	0.998333	0.996	0.987	0.988667	0.984	0.988333	0.994667	0.972667	0.970333	0.986333	0.972333	0.964333	0.993	0.983	0.967667	0.98	0.981333	0.979333
657	0.998333	0.996	0.987	0.988667	0.984	0.988333	0.994667	0.972667	0.970333	0.986333	0.972333	0.964333	0.993	0.983	0.967667	0.98	0.981333	0.979333
658	0.998333	0.996	0.986667	0.988667	0.984	0.988333	0.994667	0.972667	0.97	0.986333	0.972333	0.964	0.993	0.983	0.967667	0.98	0.981	0.979333
659	0.998333	0.996	0.986667	0.988667	0.984	0.988333	0.994667	0.972667	0.97	0.986333	0.972	0.964	0.993	0.983	0.967667	0.979667	0.981	0.979
660	0.998333	0.996	0.986667	0.988667	0.983667	0.988333	0.994667	0.972667	0.97	0.986333	0.972	0.964	0.993	0.982667	0.967333	0.979667	0.981	0.979
662	0.998333	0.996	0.986667	0.988667	0.983667	0.988333	0.994667	0.972333	0.97	0.986333	0.972	0.964	0.993	0.982667	0.967333	0.979667	0.981	0.979
662	0.998333	0.995667	0.986667	0.988333	0.983667	0.988333	0.994667	0.972333	0.97	0.986333	0.972	0.964	0.992667	0.982667	0.967333	0.979667	0.981	0.979
664	0.998333	0.995667	0.986667	0.988333	0.983667	0.988333	0.994667	0.972333	0.969667	0.986333	0.972	0.963667	0.992667	0.982667	0.967333	0.979667	0.980667	0.979
665	0.998333	0.995667	0.986667	0.988333	0.983667	0.988333	0.994667	0.972333	0.969667	0.986333	0.972	0.963667	0.992667	0.982667	0.967333	0.979667	0.980667	0.979
666	0.998333	0.995667	0.986667	0.988333	0.983333	0.988333	0.994667	0.972333	0.969667	0.986333	0.972	0.963667	0.992667	0.982667	0.967	0.979667	0.980667	0.979
667	0.998333	0.995667	0.986667	0.988333	0.983333	0.988	0.994333	0.972	0.969667	0.986	0.971667	0.963667	0.992667	0.982667	0.967	0.979333	0.980667	0.978667
668	0.998333	0.995667	0.986667	0.988333	0.983333	0.988	0.994333	0.972	0.969333	0.986	0.971667	0.963667	0.992667	0.982333	0.967	0.979333	0.980667	0.978667
669	0.998333	0.995667	0.986667	0.988333	0.983333	0.988	0.994333	0.972	0.969333	0.986	0.971667	0.963667	0.992667	0.982333	0.967	0.979333	0.980667	0.978667
670	0.998333	0.995667	0.986667	0.988333	0.983333	0.988	0.994333	0.972	0.969333	0.986	0.971667	0.963333	0.992667	0.982333	0.967	0.979333	0.980333	0.978667
671	0.998333	0.995667	0.986333	0.988333	0.983333	0.988	0.994333	0.972	0.969333	0.986	0.971667	0.963333	0.992333	0.982333	0.966667	0.979333	0.980333	0.978667
672	0.998333	0.995667	0.986333	0.988333	0.983333	0.988	0.994333	0.972	0.969333	0.986	0.971667	0.963333	0.992333	0.982333	0.966667	0.979333	0.980333	0.978667
673	0.998333	0.995667	0.986333	0.988333	0.983	0.988	0.994333	0.971667	0.969	0.986	0.971333	0.963333	0.992333	0.982333	0.966667	0.979333	0.980333	0.978333
674	0.998	0.995667	0.986333	0.988333	0.983	0.988	0.994333	0.971667	0.969	0.986	0.971333	0.963333	0.992333	0.982333	0.966667	0.979	0.980333	0.978333
675	0.998	0.995667	0.986333	0.988333	0.983	0.988	0.994333	0.971667	0.969	0.986	0.971333	0.963333	0.992333	0.982333	0.966333	0.979	0.980333	0.978333
676	0.998	0.995667	0.986333	0.988333	0.983	0.988	0.994	0.971667	0.969	0.985667	0.971333	0.963	0.992333	0.982333	0.966333	0.979	0.980333	0.978333
677	0.998	0.995667	0.986333	0.988333	0.983	0.988	0.994	0.971667	0.969	0.985667	0.971333	0.963	0.992333	0.982333	0.966333	0.979	0.980333	0.978333
678	0.998	0.995667	0.986333	0.988333	0.983	0.988	0.994	0.971667	0.969	0.985667	0.971333	0.963	0.992	0.982333	0.966333	0.979	0.98	0.978
679	0.998	0.995667	0.986333	0.988333	0.983	0.988	0.994	0.971667	0.968667	0.985667	0.971333	0.963	0.992	0.982	0.966333	0.979	0.98	0.978
680	0.998	0.995333	0.986333	0.988333	0.983	0.988	0.994	0.971333	0.968667	0.985667	0.971333	0.963	0.992	0.982	0.966	0.979	0.98	0.978
681	0.998	0.995333	0.986333	0.988333	0.983	0.988	0.994	0.971333	0.968667	0.985667	0.971	0.962667	0.992	0.982	0.966	0.979	0.98	0.978
682	0.998	0.995333	0.986333	0.988	0.983	0.987667	0.994	0.971333	0.968667	0.985667	0.971	0.962667	0.992	0.982	0.966	0.978667	0.98	0.978
683	0.998	0.995333	0.986333	0.988	0.982667	0.987667	0.994	0.971333	0.968667	0.985667	0.971	0.962667	0.992	0.982	0.966	0.978667	0.98	0.977667
684	0.998	0.995333	0.986	0.988	0.982667	0.987667	0.994	0.971333	0.968667	0.985333	0.971	0.962667	0.992	0.981667	0.966	0.978667	0.98	0.977667
685	0.998	0.995333	0.986	0.988	0.982667	0.987667	0.994	0.971333	0.968333	0.985333	0.971	0.962667	0.992	0.981667	0.966	0.978667	0.98	0.977667
686	0.998	0.995333	0.986	0.988	0.982667	0.987667	0.994	0.971333	0.968333	0.985333	0.971	0.962333	0.992	0.981667	0.965667	0.978667	0.979667	0.977667
687	0.998	0.995333	0.986	0.988	0.982667	0.987667	0.994	0.971333	0.968333	0.985333	0.970667	0.962333	0.992	0.981667	0.965667	0.978667	0.979667	0.977667
688	0.997667	0.995333	0.986	0.988	0.982667	0.987667	0.994	0.971333	0.968333	0.985333	0.970667	0.962333	0.992	0.981667	0.965667	0.978667	0.979667	0.977667
689	0.997667	0.995	0.986	0.988	0.982667	0.987667	0.994	0.971	0.968333	0.985333	0.970667	0.962333	0.991667	0.981667	0.965667	0.978333	0.979667	0.977333
690	0.997667	0.995	0.986	0.987667	0.982667	0.987667	0.994	0.971	0.968333	0.985333	0.970667	0.962333	0.991667	0.981667	0.965667	0.978333	0.979667	0.977333
691	0.997667	0.995	0.986	0.987667	0.982333	0.987667	0.994	0.971	0.968	0.985333	0.970667	0.962333	0.991667	0.981333	0.965333	0.978333	0.979667	0.977333
692	0.997667	0.995	0.986	0.987667	0.982333	0.987667	0.994	0.971	0.968	0.985	0.970333	0.962	0.991667	0.981333	0.965333	0.978333	0.979333	0.977333
693	0.997667	0.995	0.986	0.987667	0.982333	0.987333	0.993667	0.971	0.968	0.985	0.970333	0.962	0.991667	0.981333	0.965333	0.978333	0.979333	0.977333
694	0.997667	0.995	0.986	0.987667	0.982333	0.987333	0.993667	0.971	0.968	0.985	0.970333	0.962	0.991667	0.981333	0.965333	0.978333	0.979333	0.977333
695	0.997667	0.995	0.986	0.987667	0.982333	0.987333	0.993667	0.971	0.968	0.985	0.970333	0.962	0.991667	0.981333	0.965333	0.978333	0.979333	0.977333
696	0.997667	0.995	0.986	0.987667	0.982333	0.987333	0.993667	0.971	0.967667	0.985	0.970333	0.962	0.991667	0.981333	0.965	0.978	0.979333	0.977333
697	0.997667	0.995	0.986	0.987667	0.982333	0.987333	0.993667	0.970667	0.967667	0.985	0.970333	0.962	0.991667	0.981333	0.965	0.978	0.979333	0.977
698	0.997667	0.995	0.986	0.987667	0.982333	0.987333	0.993667	0.970667	0.967667	0.985	0.97	0.962	0.991333	0.981333	0.965	0.978	0.979333	0.977
699	0.997667	0.995	0.986	0.987667	0.982	0.987333	0.993667	0.970667	0.967667	0.985	0.97	0.961667	0.991333	0.981	0.965	0.978	0.979	0.977
700	0.997667	0.995	0.986	0.987667	0.982	0.987333	0.993667	0.970667	0.967667	0.985	0.97	0.961667	0.991333	0.981	0.965	0.978	0.979	0.977
701	0.997667	0.995	0.985667	0.987667	0.982	0.987333	0.993667	0.970667	0.967333	0.984667	0.97	0.961667	0.991333	0.981	0.965	0.977667	0.979	0.977
702	0.997667	0.995	0.985667	0.987667	0.982	0.987333	0.993667	0.970667	0.967333	0.984667	0.97	0.961667	0.991333	0.981	0.965	0.977667	0.979	0.977
703	0.997667	0.995	0.985667	0.987333	0.982	0.987333	0.993667	0.970667	0.967333	0.984667	0.97	0.961667	0.991333	0.981	0.964667	0.977667	0.979	0.977
704	0.997667	0.995	0.985667	0.987333	0.982	0.987333	0.993667	0.970333	0.967333	0.984667	0.97	0.961333	0.991	0.981	0.964667	0.977667	0.979	0.976667
705	0.997667	0.995	0.985667	0.987333	0.982	0.987333	0.993667	0.970333	0.967333	0.984667	0.97	0.961333	0.991	0.981	0.964667	0.977667	0.979	0.976667
706	0.997667	0.995	0.985667	0.987333	0.982	0.987333	0.993667	0.970333	0.967	0.984667	0.97	0.961333	0.991	0.980667	0.964667	0.977667	0.978667	0.976667
707	0.997667	0.995	0.985667	0.987333	0.982	0.987333	0.993333	0.970333	0.967	0.984667	0.969667	0.961333	0.991	0.980667	0.964667	0.977333	0.978667	0.976667
708	0.997667	0.995	0.985667	0.987333	0.982	0.987333	0.993333	0.970333	0.967	0.984667	0.969667	0.961333	0.991	0.980667	0.964333	0.977333	0.978667	0.976667
709	0.997667	0.994667	0.985667	0.987333	0.981667	0.987333	0.993333	0.97	0.967	0.984667	0.969667	0.961	0.991	0.980667	0.964333	0.977333	0.978667	0.976667
710	0.997667	0.994667	0.985667	0.987	0.981667	0.987333	0.993333	0.97	0.967	0.984667	0.969667	0.961	0.990667	0.980667	0.964333	0.977333	0.978667	0.976333
711	0.997667	0.994667	0.985667	0.987	0.981667	0.987	0.993333	0.97	0.967	0.984667	0.969667	0.961	0.990667	0.980667	0.964333	0.977333	0.978333	0.976333
712	0.997667	0.994667	0.985667	0.987	0.981667	0.987	0.993333	0.97	0.967	0.984667	0.969667	0.961	0.990667	0.980667	0.964333	0.977333	0.978333	0.976333
713	0.997667	0.994667	0.985667	0.987	0.981667	0.987	0.993333	0.97	0.967	0.984667	0.969667	0.961	0.990667	0.980333	0.964	0.977	0.978333	0.976333
714	0.997667	0.994667	0.985667	0.987	0.981667	0.987	0.993333	0.969667	0.966667	0.984333	0.969333	0.961	0.990667	0.980333	0.964	0.977	0.978333	0.976333
715	0.997667	0.994667	0.985667	0.987	0.981667	0.987	0.993	0.969667	0.966667	0.984333	0.969333	0.960667	0.990667	0.980333	0.964	0.977	0.978333	0.976
716	0.997667	0.994667	0.985333	0.987	0.981333	0.987	0.993	0.969667	0.966667	0.984333	0.969333	0.960667	0.990667	0.980333	0.964	0.977	0.978	0.976
717	0.997667	0.994667	0.985333	0.986667	0.981333	0.987	0.993	0.969667	0.966667	0.984333	0.969333	0.960667	0.990667	0.980333	0.964	0.977	0.978	0.976
718	0.997667	0.994667	0.985333	0.986667	0.981333	0.987	0.993	0.969667	0.966667	0.984333	0.969333	0.960667	0.990333	0.98	0.964	0.977	0.978	0.976
719	0.997667	0.994667	0.985333	0.986667	0.981333	0.987	0.993	0.969667	0.966667	0.984333	0.969333	0.960667	0.990333	0.98	0.963667	0.977	0.978	0.976
720	0.997667	0.994667	0.985333	0.986667	0.981333	0.987	0.993	0.969667	0.966667	0.984333	0.969333	0.960667	0.990333	0.98	0.963667	0.977	0.978	0.976
721	0.997667	0.994667	0.985333	0.986667	0.981333	0.986667	0.993	0.969333	0.966667	0.984333	0.969333	0.960667	0.990333	0.98	0.963667	0.977	0.978	0.976
722	0.997667	0.994667	0.985333	0.986667	0.981	0.986667	0.993	0.969333	0.966333	0.984333	0.969333	0.960333	0.990333	0.98	0.963667	0.976667	0.977667	0.975667
723	0.997667	0.994667	0.985333	0.986667	0.981	0.986667	0.993	0.969333	0.966333	0.984333	0.969	0.960333	0.990333	0.98	0.963667	0.976667	0.977667	0.975667
724	0.997667	0.994667	0.985333	0.986667	0.981	0.986667	0.993	0.969333	0.966333	0.984333	0.969	0.960333	0.990333	0.979667	0.963667	0.976667	0.977667	0.975667
725	0.997667	0.994667	0.985	0.986667	0.981	0.986667	0.993	0.969333	0.966333	0.984	0.969	0.960333	0.990333	0.979667	0.963333	0.976667	0.977667	0.975667
726	0.997667	0.994667	0.985	0.986667	0.981	0.986667	0.993	0.969333	0.966333	0.984	0.969	0.960333	0.990333	0.979667	0.963333	0.976667	0.977667	0.975667
727	0.997667	0.994667	0.985	0.986333	0.981	0.986667	0.993	0.969333	0.966333	0.984	0.969	0.960333	0.990333	0.979667	0.963333	0.976667	0.977667	0.975667
728	0.997667	0.994667	0.985	0.986333	0.981	0.986667	0.992667	0.969333	0.966	0.984	0.969	0.960333	0.99	0.979667	0.963333	0.976667	0.977667	0.975667
729	0.997333	0.994667	0.985	0.986333	0.980667	0.986333	0.992667	0.969333	0.966	0.984	0.969	0.96	0.99	0.979667	0.963333	0.976333	0.977333	0.975667
730	0.997333	0.994333	0.985	0.986333	0.980667	0.986333	0.992667	0.969	0.966	0.984	0.969	0.96	0.99	0.979667	0.963333	0.976333	0.977333	0.975667
731	0.997333	0.994333	0.984667	0.986333	0.980667	0.986333	0.992667	0.969	0.966	0.984	0.969	0.96	0.99	0.979667	0.963	0.976333	0.977333	0.975667
732	0.997333	0.994333	0.984667	0.986333	0.980667	0.986333	0.992667	0.969	0.966	0.983667	0.968667	0.96	0.99	0.979333	0.963	0.976333	0.977333	0.975333
733	0.997333	0.994333	0.984667	0.986333	0.980667	0.986333	0.992667	0.969	0.966	0.983667	0.968667	0.96	0.99	0.979333	0.963	0.976333	0.977333	0.975333
735	0.997333	0.994333	0.984667	0.986333	0.980667	0.986333	0.992667	0.969	0.965667	0.983667	0.968667	0.96	0.99	0.979333	0.963	0.976333	0.977333	0.975333
736	0.997333	0.994333	0.984667	0.986	0.980667	0.986333	0.992667	0.969	0.965667	0.983667	0.968667	0.96	0.989667	0.979333	0.963	0.976333	0.977	0.975333
737	0.997333	0.994333	0.984667	0.986	0.980667	0.986333	0.992667	0.969	0.965667	0.983667	0.968667	0.959667	0.989667	0.979333	0.963	0.976	0.977	0.975333
738	0.997333	0.994333	0.984667	0.986	0.980667	0.986333	0.992667	0.969	0.965667	0.983667	0.968667	0.959667	0.989667	0.979333	0.963	0.976	0.977	0.975333
739	0.997333	0.994333	0.984667	0.986	0.980667	0.986333	0.992667	0.968667	0.965333	0.983667	0.968667	0.959667	0.989667	0.979333	0.962667	0.976	0.977	0.975
740	0.997333	0.994333	0.984667	0.986	0.980667	0.986333	0.992667	0.968667	0.965333	0.983333	0.968333	0.959667	0.989667	0.979	0.962667	0.976	0.977	0.975
741	0.997333	0.994333	0.984667	0.986	0.980333	0.986333	0.992667	0.968667	0.965333	0.983333	0.968333	0.959667	0.989667	0.979	0.962667	0.976	0.976667	0.975
742	0.997333	0.994333	0.984333	0.986	0.980333	0.986333	0.992667	0.968667	0.965333	0.983333	0.968333	0.959667	0.989333	0.979	0.962667	0.976	0.976667	0.975
743	0.997333	0.994333	0.984333	0.986	0.980333	0.986	0.992667	0.968667	0.965333	0.983333	0.968333	0.959667	0.989333	0.979	0.962667	0.976	0.976667	0.975
744	0.997333	0.994333	0.984333	0.985667	0.980333	0.986	0.992667	0.968667	0.965333	0.983333	0.968333	0.959333	0.989333	0.979	0.962667	0.975667	0.976667	0.975
745	0.997333	0.994333	0.984333	0.985667	0.980333	0.986	0.992667	0.968667	0.965	0.983333	0.968333	0.959333	0.989333	0.979	0.962667	0.975667	0.976667	0.974667
746	0.997333	0.994333	0.984333	0.985667	0.980333	0.986	0.992333	0.968667	0.965	0.983333	0.968333	0.959333	0.989333	0.979	0.962667	0.975667	0.976667	0.974667
747	0.997333	0.994333	0.984333	0.985667	0.980333	0.986	0.992333	0.968333	0.965	0.983333	0.968	0.959333	0.989333	0.978667	0.962333	0.975667	0.976667	0.974667
748	0.997333	0.994333	0.984333	0.985667	0.980333	0.986	0.992333	0.968333	0.965	0.983333	0.968	0.959333	0.989	0.978667	0.962333	0.975667	0.976333	0.974667
749	0.997333	0.994333	0.984333	0.985667	0.980333	0.986	0.992333	0.968333	0.965	0.983	0.968	0.959	0.989	0.978667	0.962333	0.975667	0.976333	0.974667
750	0.997333	0.994333	0.984333	0.985667	0.980333	0.986	0.992333	0.968333	0.965	0.983	0.968	0.959	0.989	0.978667	0.962333	0.975667	0.976333	0.974333
751	0.997333	0.994333	0.984333	0.985667	0.98	0.986	0.992333	0.968333	0.965	0.983	0.968	0.959	0.989	0.978667	0.962333	0.975333	0.976333	0.974333
752	0.997	0.994333	0.984333	0.985667	0.98	0.986	0.992333	0.968333	0.965	0.983	0.968	0.959	0.989	0.978667	0.962	0.975333	0.976333	0.974333
753	0.997	0.994333	0.984333	0.985667	0.98	0.985667	0.992333	0.968333	0.965	0.983	0.967667	0.959	0.989	0.978667	0.962	0.975333	0.976333	0.974333
754	0.997	0.994333	0.984	0.985667	0.98	0.985667	0.992333	0.968	0.964667	0.983	0.967667	0.958667	0.989	0.978667	0.962	0.975333	0.976333	0.974333
755	0.997	0.994333	0.984	0.985667	0.98	0.985667	0.992333	0.968	0.964667	0.983	0.967667	0.958667	0.989	0.978333	0.962	0.975333	0.976333	0.974333
756	0.997	0.994333	0.984	0.985667	0.98	0.985667	0.992333	0.968	0.964667	0.983	0.967667	0.958667	0.989	0.978333	0.962	0.975333	0.976	0.974333
757	0.997	0.994333	0.984	0.985667	0.98	0.985667	0.992	0.968	0.964667	0.982667	0.967667	0.958667	0.988667	0.978333	0.961667	0.975	0.976	0.974
758	0.997	0.994333	0.984	0.985667	0.98	0.985667	0.992	0.968	0.964667	0.982667	0.967667	0.958667	0.988667	0.978333	0.961667	0.975	0.976	0.974
759	0.997	0.994333	0.984	0.985667	0.98	0.985667	0.992	0.968	0.964667	0.982667	0.967667	0.958667	0.988667	0.978333	0.961667	0.975	0.976	0.974
760	0.997	0.994	0.984	0.985667	0.98	0.985667	0.992	0.967667	0.964667	0.982667	0.967333	0.958667	0.988667	0.978333	0.961667	0.975	0.976	0.974
761	0.997	0.994	0.984	0.985667	0.979667	0.985667	0.992	0.967667	0.964667	0.982667	0.967333	0.958667	0.988667	0.978	0.961667	0.975	0.976	0.974
762	0.997	0.994	0.984	0.985333	0.979667	0.985667	0.992	0.967667	0.964667	0.982667	0.967333	0.958333	0.988667	0.978	0.961667	0.975	0.976	0.974
763	0.997	0.994	0.984	0.985333	0.979667	0.985667	0.992	0.967667	0.964333	0.982667	0.967333	0.958333	0.988667	0.978	0.961667	0.974667	0.976	0.974
764	0.997	0.994	0.984	0.985333	0.979667	0.985667	0.992	0.967667	0.964333	0.982333	0.967333	0.958333	0.988667	0.978	0.961333	0.974667	0.976	0.973667
765	0.997	0.994	0.984	0.985333	0.979667	0.985333	0.992	0.967667	0.964333	0.982333	0.967333	0.958333	0.988333	0.978	0.961333	0.974667	0.975667	0.973667
766	0.997	0.994	0.984	0.985333	0.979667	0.985333	0.992	0.967667	0.964333	0.982333	0.967333	0.958333	0.988333	0.978	0.961333	0.974667	0.975667	0.973667
767	0.997	0.994	0.984	0.985333	0.979667	0.985333	0.991667	0.967667	0.964333	0.982333	0.967333	0.958333	0.988333	0.977667	0.961333	0.974667	0.975667	0.973667
768	0.997	0.994	0.984	0.985333	0.979667	0.985333	0.991667	0.967333	0.964333	0.982333	0.967333	0.958	0.988333	0.977667	0.961333	0.974333	0.975667	0.973667
769	0.997	0.994	0.983667	0.985	0.979333	0.985333	0.991667	0.967333	0.964333	0.982333	0.967	0.958	0.988333	0.977667	0.961333	0.974333	0.975667	0.973667
770	0.997	0.994	0.983667	0.985	0.979333	0.985333	0.991667	0.967333	0.964333	0.982333	0.967	0.958	0.988333	0.977667	0.961	0.974333	0.975667	0.973333
771	0.997	0.994	0.983667	0.985	0.979333	0.985333	0.991667	0.967333	0.964333	0.982333	0.967	0.958	0.988	0.977667	0.961	0.974333	0.975333	0.973333
772	0.997	0.994	0.983667	0.985	0.979333	0.985333	0.991667	0.967333	0.964	0.982333	0.967	0.958	0.988	0.977667	0.961	0.974333	0.975333	0.973333
773	0.997	0.994	0.983667	0.985	0.979333	0.985333	0.991667	0.967333	0.964	0.982333	0.967	0.958	0.988	0.977667	0.961	0.974333	0.975333	0.973333
775	0.997	0.994	0.983667	0.985	0.979333	0.985333	0.991667	0.967	0.964	0.982	0.967	0.958	0.988	0.977667	0.961	0.974	0.975333	0.973333
775	0.997	0.993667	0.983667	0.985	0.979333	0.985	0.991667	0.967	0.964	0.982	0.966667	0.957667	0.988	0.977333	0.961	0.974	0.975333	0.973
776	0.997	0.993667	0.983667	0.984667	0.979333	0.985	0.991667	0.967	0.964	0.982	0.966667	0.957667	0.988	0.977333	0.960667	0.974	0.975333	0.973
777	0.997	0.993667	0.983667	0.984667	0.979	0.985	0.991667	0.967	0.964	0.982	0.966667	0.957667	0.987667	0.977333	0.960667	0.974	0.975	0.973
778	0.997	0.993667	0.983667	0.984667	0.979	0.985	0.991667	0.967	0.964	0.982	0.966667	0.957667	0.987667	0.977333	0.960667	0.974	0.975	0.973
779	0.997	0.993667	0.983667	0.984667	0.979	0.985	0.991333	0.967	0.964	0.982	0.966667	0.957667	0.987667	0.977333	0.960667	0.974	0.975	0.973
780	0.997	0.993667	0.983667	0.984667	0.979	0.985	0.991333	0.966667	0.963667	0.982	0.966667	0.957667	0.987667	0.977333	0.960667	0.973667	0.975	0.972667
781	0.997	0.993667	0.983667	0.984667	0.979	0.985	0.991333	0.966667	0.963667	0.982	0.966333	0.957333	0.987667	0.977333	0.960333	0.973667	0.975	0.972667
782	0.997	0.993667	0.983667	0.984667	0.979	0.985	0.991333	0.966667	0.963667	0.982	0.966333	0.957333	0.987667	0.977333	0.960333	0.973667	0.975	0.972667
783	0.997	0.993667	0.983667	0.984667	0.979	0.985	0.991333	0.966667	0.963667	0.981667	0.966333	0.957333	0.987333	0.977	0.960333	0.973667	0.974667	0.972667
784	0.997	0.993667	0.983333	0.984667	0.978667	0.984667	0.991333	0.966667	0.963667	0.981667	0.966333	0.957333	0.987333	0.977	0.960333	0.973667	0.974667	0.972667
785	0.996667	0.993667	0.983333	0.984333	0.978667	0.984667	0.991333	0.966333	0.963667	0.981667	0.966333	0.957333	0.987333	0.977	0.960333	0.973667	0.974667	0.972667
786	0.996667	0.993667	0.983333	0.984333	0.978667	0.984667	0.991333	0.966333	0.963667	0.981667	0.966333	0.957333	0.987333	0.977	0.96	0.973667	0.974667	0.972667
787	0.996667	0.993667	0.983333	0.984333	0.978667	0.984667	0.991333	0.966333	0.963667	0.981667	0.966333	0.957333	0.987333	0.977	0.96	0.973667	0.974667	0.972667
788	0.996667	0.993667	0.983333	0.984333	0.978667	0.984667	0.991333	0.966333	0.963333	0.981667	0.966	0.957	0.987	0.977	0.96	0.973667	0.974667	0.972333
789	0.996667	0.993667	0.983333	0.984333	0.978667	0.984667	0.991333	0.966333	0.963333	0.981667	0.966	0.957	0.987	0.977	0.96	0.973667	0.974667	0.972333
790	0.996667	0.993667	0.983333	0.984333	0.978667	0.984667	0.991333	0.966333	0.963333	0.981333	0.966	0.957	0.987	0.976667	0.96	0.973333	0.974333	0.972333
791	0.996667	0.993667	0.983333	0.984333	0.978667	0.984667	0.991333	0.966333	0.963333	0.981333	0.966	0.957	0.987	0.976667	0.96	0.973333	0.974333	0.972333
792	0.996667	0.993333	0.983333	0.984333	0.978667	0.984667	0.991333	0.966	0.963333	0.981333	0.966	0.957	0.987	0.976667	0.96	0.973333	0.974333	0.972333
793	0.996667	0.993333	0.983333	0.984	0.978667	0.984667	0.991333	0.966	0.963333	0.981333	0.966	0.957	0.987	0.976667	0.959667	0.973333	0.974333	0.972333
795	0.996667	0.993333	0.983333	0.984	0.978333	0.984667	0.991	0.966	0.963	0.981333	0.966	0.957	0.987	0.976667	0.959667	0.973333	0.974333	0.972333
796	0.996667	0.993333	0.983333	0.984	0.978333	0.984667	0.991	0.966	0.963	0.981333	0.966	0.957	0.986667	0.976667	0.959667	0.973333	0.974333	0.972
797	0.996667	0.993333	0.983333	0.984	0.978333	0.984667	0.991	0.966	0.963	0.981333	0.965667	0.956667	0.986667	0.976333	0.959667	0.973333	0.974	0.972
798	0.996667	0.993333	0.983	0.984	0.978333	0.984667	0.991	0.966	0.963	0.981	0.965667	0.956667	0.986667	0.976333	0.959667	0.973333	0.974	0.972
799	0.996667	0.993333	0.983	0.984	0.978333	0.984333	0.991	0.965667	0.963	0.981	0.965667	0.956667	0.986667	0.976333	0.959667	0.973	0.974	0.972
800	0.996667	0.993333	0.983	0.984	0.978333	0.984333	0.991	0.965667	0.962667	0.981	0.965667	0.956667	0.986667	0.976333	0.959667	0.973	0.974	0.972
801	0.996667	0.993333	0.983	0.984	0.978333	0.984333	0.991	0.965667	0.962667	0.981	0.965667	0.956667	0.986667	0.976333	0.959667	0.973	0.974	0.971667
802	0.996667	0.993333	0.983	0.984	0.978	0.984333	0.991	0.965667	0.962667	0.981	0.965667	0.956667	0.986667	0.976333	0.959333	0.973	0.974	0.971667
803	0.996667	0.993333	0.983	0.983667	0.978	0.984333	0.990667	0.965667	0.962667	0.981	0.965667	0.956667	0.986667	0.976333	0.959333	0.973	0.973667	0.971667
804	0.996667	0.993333	0.983	0.983667	0.978	0.984333	0.990667	0.965667	0.962667	0.981	0.965333	0.956667	0.986333	0.976	0.959333	0.973	0.973667	0.971667
805	0.996667	0.993333	0.983	0.983667	0.978	0.984333	0.990667	0.965667	0.962667	0.981	0.965333	0.956333	0.986333	0.976	0.959333	0.973	0.973667	0.971667
806	0.996667	0.993333	0.983	0.983667	0.978	0.984333	0.990667	0.965667	0.962667	0.980667	0.965333	0.956333	0.986333	0.976	0.959333	0.972667	0.973667	0.971333
807	0.996667	0.993333	0.983	0.983667	0.978	0.984333	0.990667	0.965333	0.962333	0.980667	0.965333	0.956333	0.986333	0.976	0.959333	0.972667	0.973667	0.971333
808	0.996667	0.993333	0.983	0.983667	0.978	0.984333	0.990667	0.965333	0.962333	0.980667	0.965333	0.956333	0.986333	0.976	0.959	0.972667	0.973667	0.971333
809	0.996667	0.993333	0.982667	0.983667	0.977667	0.984333	0.990667	0.965333	0.962333	0.980667	0.965333	0.956333	0.986333	0.976	0.959	0.972667	0.973667	0.971333
810	0.996667	0.993333	0.982667	0.983667	0.977667	0.984	0.990667	0.965333	0.962333	0.980667	0.965	0.956333	0.986333	0.976	0.959	0.972667	0.973333	0.971333
811	0.996667	0.993333	0.982667	0.983333	0.977667	0.984	0.990667	0.965333	0.962333	0.980667	0.965	0.956	0.986333	0.976	0.959	0.972667	0.973333	0.971333
812	0.996667	0.993333	0.982667	0.983333	0.977667	0.984	0.990667	0.965333	0.962333	0.980667	0.965	0.956	0.986333	0.975667	0.959	0.972333	0.973333	0.971333
813	0.996667	0.993333	0.982667	0.983333	0.977667	0.984	0.990333	0.965333	0.962333	0.980333	0.965	0.956	0.986	0.975667	0.959	0.972333	0.973333	0.971333
814	0.996667	0.993333	0.982667	0.983333	0.977667	0.984	0.990333	0.965333	0.962333	0.980333	0.965	0.956	0.986	0.975667	0.959	0.972333	0.973333	0.971
815	0.996667	0.993333	0.982667	0.983333	0.977667	0.984	0.990333	0.965333	0.962	0.980333	0.965	0.956	0.986	0.975667	0.958667	0.972333	0.973333	0.971
816	0.996667	0.993333	0.982333	0.983333	0.977333	0.984	0.990333	0.965333	0.962	0.980333	0.965	0.956	0.986	0.975667	0.958667	0.972333	0.973333	0.971
817	0.996667	0.993333	0.982333	0.983333	0.977333	0.984	0.990333	0.965333	0.962	0.980333	0.964667	0.955667	0.986	0.975667	0.958667	0.972333	0.973333	0.971
818	0.996667	0.993333	0.982333	0.983333	0.977333	0.984	0.990333	0.965333	0.962	0.980333	0.964667	0.955667	0.986	0.975667	0.958667	0.972333	0.973333	0.971
819	0.996667	0.993333	0.982333	0.983333	0.977333	0.984	0.990333	0.965	0.962	0.980333	0.964667	0.955667	0.986	0.975333	0.958667	0.972	0.973	0.971
820	0.996667	0.993333	0.982333	0.983333	0.977333	0.984	0.990333	0.965	0.961667	0.980333	0.964667	0.955667	0.985667	0.975333	0.958667	0.972	0.973	0.971
821	0.996667	0.993333	0.982333	0.983	0.977333	0.984	0.990333	0.965	0.961667	0.98	0.964667	0.955667	0.985667	0.975333	0.958667	0.972	0.973	0.971
822	0.996667	0.993333	0.982333	0.983	0.977333	0.984	0.990333	0.965	0.961667	0.98	0.964667	0.955333	0.985667	0.975333	0.958333	0.972	0.973	0.971
823	0.996667	0.993333	0.982333	0.983	0.977	0.984	0.990333	0.965	0.961667	0.98	0.964333	0.955333	0.985667	0.975333	0.958333	0.972	0.973	0.971
824	0.996667	0.993333	0.982333	0.983	0.977	0.983667	0.990333	0.965	0.961667	0.98	0.964333	0.955333	0.985667	0.975333	0.958333	0.972	0.973	0.970667
825	0.996667	0.993333	0.982333	0.983	0.977	0.983667	0.990333	0.965	0.961333	0.98	0.964333	0.955333	0.985667	0.975	0.958333	0.972	0.973	0.970667
826	0.996667	0.993333	0.982333	0.983	0.977	0.983667	0.99	0.964667	0.961333	0.98	0.964333	0.955333	0.985667	0.975	0.958333	0.971667	0.972667	0.970667
827	0.996333	0.993	0.982333	0.983	0.977	0.983667	0.99	0.964667	0.961333	0.98	0.964333	0.955	0.985333	0.975	0.958333	0.971667	0.972667	0.970667
828	0.996333	0.993	0.982333	0.983	0.977	0.983667	0.99	0.964667	0.961333	0.98	0.964333	0.955	0.985333	0.975	0.958333	0.971667	0.972667	0.970667
829	0.996333	0.993	0.982333	0.983	0.976667	0.983667	0.99	0.964667	0.961333	0.98	0.964333	0.955	0.985333	0.975	0.958	0.971667	0.972667	0.970667
830	0.996333	0.993	0.982	0.982667	0.976667	0.983667	0.99	0.964667	0.961	0.979667	0.964	0.955	0.985333	0.975	0.958	0.971667	0.972667	0.970333
831	0.996333	0.993	0.982	0.982667	0.976667	0.983667	0.99	0.964667	0.961	0.979667	0.964	0.955	0.985333	0.974667	0.958	0.971333	0.972667	0.970333
832	0.996333	0.993	0.982	0.982667	0.976667	0.983667	0.99	0.964667	0.961	0.979667	0.964	0.955	0.985333	0.974667	0.958	0.971333	0.972333	0.970333
833	0.996333	0.993	0.982	0.982667	0.976667	0.983667	0.99	0.964667	0.961	0.979667	0.964	0.955	0.985	0.974667	0.958	0.971333	0.972333	0.970333
834	0.996333	0.993	0.982	0.982667	0.976667	0.983667	0.99	0.964333	0.961	0.979667	0.964	0.955	0.985	0.974667	0.958	0.971333	0.972333	0.970333
835	0.996333	0.993	0.982	0.982667	0.976333	0.983667	0.99	0.964333	0.961	0.979667	0.964	0.954667	0.985	0.974667	0.957667	0.971333	0.972333	0.97
836	0.996333	0.993	0.982	0.982667	0.976333	0.983667	0.99	0.964333	0.961	0.979667	0.964	0.954667	0.985	0.974667	0.957667	0.971	0.972333	0.97
837	0.996333	0.992667	0.982	0.982333	0.976333	0.983667	0.99	0.964333	0.960667	0.979667	0.964	0.954667	0.985	0.974667	0.957667	0.971	0.972333	0.97
838	0.996	0.992667	0.982	0.982333	0.976333	0.983333	0.99	0.964333	0.960667	0.979667	0.963667	0.954667	0.985	0.974667	0.957667	0.971	0.972333	0.97
839	0.996	0.992667	0.982	0.982333	0.976333	0.983333	0.99	0.964333	0.960667	0.979667	0.963667	0.954667	0.985	0.974667	0.957667	0.971	0.972333	0.97
840	0.996	0.992667	0.982	0.982333	0.976333	0.983333	0.99	0.964333	0.960667	0.979667	0.963667	0.954667	0.985	0.974667	0.957667	0.971	0.972	0.97
841	0.996	0.992667	0.982	0.982333	0.976333	0.983333	0.989667	0.964333	0.960667	0.979667	0.963667	0.954667	0.984667	0.974667	0.957333	0.971	0.972	0.97
842	0.996	0.992667	0.982	0.982333	0.976333	0.983333	0.989667	0.964	0.960667	0.979333	0.963667	0.954667	0.984667	0.974667	0.957333	0.971	0.972	0.969667
843	0.996	0.992667	0.981667	0.982333	0.976333	0.983333	0.989667	0.964	0.960667	0.979333	0.963667	0.954333	0.984667	0.974333	0.957333	0.970667	0.972	0.969667
844	0.996	0.992667	0.981667	0.982333	0.976	0.983333	0.989667	0.964	0.960333	0.979333	0.963667	0.954333	0.984667	0.974333	0.957333	0.970667	0.972	0.969667
845	0.996	0.992667	0.981667	0.982333	0.976	0.983333	0.989667	0.964	0.960333	0.979333	0.963333	0.954333	0.984667	0.974333	0.957333	0.970667	0.972	0.969667
846	0.996	0.992667	0.981667	0.982333	0.976	0.983333	0.989667	0.964	0.960333	0.979333	0.963333	0.954333	0.984667	0.974333	0.957333	0.970667	0.972	0.969667
847	0.996	0.992667	0.981667	0.982333	0.976	0.983333	0.989667	0.964	0.960333	0.979333	0.963333	0.954333	0.984667	0.974333	0.957333	0.970667	0.972	0.969667
848	0.996	0.992667	0.981667	0.982333	0.976	0.983333	0.989667	0.964	0.960333	0.979333	0.963333	0.954333	0.984667	0.974333	0.957333	0.970667	0.971667	0.969667
849	0.996	0.992667	0.981667	0.982333	0.976	0.983333	0.989667	0.964	0.960333	0.979333	0.963333	0.954333	0.984333	0.974333	0.957	0.970667	0.971667	0.969333
850	0.996	0.992667	0.981667	0.982333	0.976	0.983333	0.989667	0.963667	0.960333	0.979	0.963333	0.954333	0.984333	0.974333	0.957	0.970667	0.971667	0.969333
851	0.995667	0.992667	0.981667	0.982333	0.976	0.983333	0.989333	0.963667	0.960333	0.979	0.963333	0.954	0.984333	0.974333	0.957	0.970333	0.971667	0.969333
852	0.995667	0.992667	0.981667	0.982	0.975667	0.983	0.989333	0.963667	0.96	0.979	0.963	0.954	0.984333	0.974333	0.957	0.970333	0.971667	0.969333
853	0.995667	0.992667	0.981667	0.982	0.975667	0.983	0.989333	0.963667	0.96	0.979	0.963	0.954	0.984333	0.974333	0.957	0.970333	0.971667	0.969333
854	0.995667	0.992667	0.981333	0.982	0.975667	0.983	0.989333	0.963667	0.96	0.979	0.963	0.954	0.984333	0.974	0.957	0.970333	0.971667	0.969333
855	0.995667	0.992667	0.981333	0.982	0.975667	0.983	0.989333	0.963667	0.96	0.979	0.963	0.954	0.984	0.974	0.956667	0.970333	0.971333	0.969333
856	0.995667	0.992667	0.981333	0.982	0.975667	0.983	0.989333	0.963667	0.96	0.978667	0.963	0.954	0.984	0.974	0.956667	0.970333	0.971333	0.969
857	0.995667	0.992667	0.981333	0.982	0.975667	0.983	0.989333	0.963667	0.96	0.978667	0.963	0.954	0.984	0.974	0.956667	0.970333	0.971333	0.969
858	0.995667	0.992667	0.981333	0.982	0.975667	0.983	0.989333	0.963667	0.96	0.978667	0.963	0.954	0.984	0.974	0.956667	0.970333	0.971333	0.969
860	0.995667	0.992667	0.981333	0.982	0.975667	0.983	0.989333	0.963667	0.959667	0.978667	0.962667	0.954	0.984	0.974	0.956667	0.97	0.971333	0.969
861	0.995667	0.992333	0.981333	0.982	0.975333	0.983	0.989333	0.963333	0.959667	0.978667	0.962667	0.953667	0.984	0.974	0.956667	0.97	0.971333	0.969
862	0.995667	0.992333	0.981333	0.982	0.975333	0.983	0.989333	0.963333	0.959667	0.978667	0.962667	0.953667	0.983667	0.973667	0.956667	0.97	0.971	0.969
863	0.995667	0.992333	0.981333	0.981667	0.975333	0.983	0.989	0.963333	0.959667	0.978333	0.962667	0.953667	0.983667	0.973667	0.956333	0.97	0.971	0.969
864	0.995667	0.992333	0.981333	0.981667	0.975333	0.983	0.989	0.963333	0.959667	0.978333	0.962667	0.953667	0.983667	0.973667	0.956333	0.97	0.971	0.968667
865	0.995667	0.992333	0.981333	0.981667	0.975333	0.983	0.989	0.963333	0.959333	0.978333	0.962667	0.953667	0.983667	0.973667	0.956333	0.97	0.971	0.968667
866	0.995667	0.992333	0.981333	0.981667	0.975333	0.983	0.989	0.963333	0.959333	0.978333	0.962333	0.953667	0.983667	0.973667	0.956333	0.97	0.971	0.968667
867	0.995667	0.992333	0.981	0.981667	0.975333	0.983	0.989	0.963333	0.959333	0.978333	0.962333	0.953667	0.983667	0.973667	0.956333	0.969667	0.971	0.968667
868	0.995667	0.992333	0.981	0.981667	0.975333	0.983	0.989	0.963333	0.959333	0.978333	0.962333	0.953667	0.983667	0.973333	0.956333	0.969667	0.971	0.968667
869	0.995667	0.992333	0.981	0.981667	0.975333	0.982667	0.989	0.963	0.959333	0.978333	0.962333	0.953667	0.983667	0.973333	0.956	0.969667	0.970667	0.968667
870	0.995333	0.992333	0.981	0.981667	0.975	0.982667	0.989	0.963	0.959333	0.978	0.962333	0.953667	0.983333	0.973333	0.956	0.969667	0.970667	0.968333
871	0.995333	0.992333	0.981	0.981333	0.975	0.982667	0.989	0.963	0.959	0.978	0.962	0.953333	0.983333	0.973333	0.956	0.969667	0.970667	0.968333
872	0.995333	0.992333	0.981	0.981333	0.975	0.982667	0.989	0.963	0.959	0.978	0.962	0.953333	0.983333	0.973333	0.956	0.969667	0.970667	0.968333
873	0.995333	0.992333	0.981	0.981333	0.975	0.982667	0.989	0.963	0.959	0.978	0.962	0.953333	0.983333	0.973	0.956	0.969333	0.970667	0.968333
874	0.995333	0.992333	0.981	0.981333	0.975	0.982667	0.989	0.962667	0.959	0.978	0.962	0.953333	0.983333	0.973	0.956	0.969333	0.970667	0.968333
875	0.995333	0.992333	0.981	0.981333	0.975	0.982667	0.989	0.962667	0.958667	0.978	0.962	0.953333	0.983333	0.973	0.956	0.969333	0.970667	0.968333
876	0.995333	0.992333	0.981	0.981333	0.975	0.982667	0.989	0.962667	0.958667	0.978	0.962	0.953333	0.983333	0.973	0.956	0.969333	0.970667	0.968
877	0.995333	0.992333	0.981	0.981333	0.975	0.982667	0.988667	0.962667	0.958667	0.978	0.962	0.953333	0.983333	0.973	0.955667	0.969333	0.970667	0.968
878	0.995333	0.992333	0.980667	0.981333	0.975	0.982667	0.988667	0.962667	0.958667	0.978	0.962	0.953333	0.983333	0.973	0.955667	0.969333	0.970333	0.968
879	0.995333	0.992333	0.980667	0.981333	0.975	0.982333	0.988667	0.962667	0.958667	0.977667	0.961667	0.953	0.983	0.973	0.955667	0.969333	0.970333	0.968
880	0.995333	0.992333	0.980667	0.981	0.975	0.982333	0.988667	0.962333	0.958667	0.977667	0.961667	0.953	0.983	0.973	0.955667	0.969	0.970333	0.968
881	0.995333	0.992	0.980667	0.981	0.975	0.982333	0.988667	0.962333	0.958667	0.977667	0.961667	0.953	0.983	0.972667	0.955667	0.969	0.970333	0.968
882	0.995333	0.992	0.980667	0.981	0.975	0.982333	0.988667	0.962333	0.958667	0.977667	0.961667	0.953	0.983	0.972667	0.955667	0.969	0.970333	0.968
883	0.995333	0.992	0.980667	0.981	0.975	0.982333	0.988667	0.962333	0.958333	0.977667	0.961667	0.953	0.983	0.972667	0.955333	0.969	0.970333	0.968
884	0.995333	0.992	0.980667	0.981	0.975	0.982333	0.988667	0.962333	0.958333	0.977667	0.961667	0.953	0.983	0.972667	0.955333	0.969	0.970333	0.968
885	0.995333	0.992	0.980667	0.981	0.975	0.982333	0.988333	0.962333	0.958333	0.977333	0.961667	0.953	0.983	0.972667	0.955333	0.969	0.97	0.968
886	0.995333	0.992	0.980667	0.981	0.975	0.982333	0.988333	0.962333	0.958333	0.977333	0.961667	0.953	0.982667	0.972667	0.955333	0.968667	0.97	0.967667
887	0.995333	0.992	0.980667	0.981	0.974667	0.982333	0.988333	0.962333	0.958333	0.977333	0.961667	0.953	0.982667	0.972667	0.955333	0.968667	0.97	0.967667
888	0.995333	0.992	0.980667	0.981	0.974667	0.982	0.988333	0.962333	0.958333	0.977333	0.961333	0.952667	0.982667	0.972333	0.955	0.968667	0.97	0.967667
889	0.995333	0.992	0.980667	0.981	0.974667	0.982	0.988333	0.962	0.958333	0.977333	0.961333	0.952667	0.982667	0.972333	0.955	0.968667	0.969667	0.967667
890	0.995333	0.992	0.980667	0.981	0.974667	0.982	0.988333	0.962	0.958333	0.977333	0.961333	0.952667	0.982667	0.972333	0.955	0.968667	0.969667	0.967667
891	0.995333	0.992	0.980667	0.981	0.974667	0.982	0.988333	0.962	0.958333	0.977333	0.961333	0.952667	0.982667	0.972333	0.955	0.968333	0.969667	0.967667
892	0.995333	0.992	0.980667	0.981	0.974667	0.982	0.988333	0.962	0.958333	0.977333	0.961333	0.952667	0.982333	0.972333	0.955	0.968333	0.969667	0.967667
893	0.995333	0.992	0.980667	0.981	0.974667	0.982	0.988333	0.962	0.958	0.977	0.961333	0.952667	0.982333	0.972333	0.955	0.968333	0.969667	0.967667
894	0.995333	0.992	0.980667	0.981	0.974667	0.982	0.988333	0.962	0.958	0.977	0.961333	0.952667	0.982333	0.972333	0.954667	0.968333	0.969667	0.967333
895	0.995333	0.992	0.980667	0.980667	0.974333	0.982	0.988333	0.962	0.958	0.977	0.961333	0.952667	0.982333	0.972	0.954667	0.968333	0.969333	0.967333
896	0.995333	0.991667	0.980333	0.980667	0.974333	0.982	0.988333	0.962	0.958	0.977	0.961	0.952667	0.982333	0.972	0.954667	0.968333	0.969333	0.967333
897	0.995333	0.991667	0.980333	0.980667	0.974333	0.981667	0.988333	0.962	0.958	0.977	0.961	0.952333	0.982333	0.972	0.954667	0.968333	0.969333	0.967333
898	0.995333	0.991667	0.980333	0.980667	0.974333	0.981667	0.988333	0.962	0.958	0.977	0.961	0.952333	0.982333	0.972	0.954667	0.968	0.969333	0.967333
899	0.995333	0.991667	0.980333	0.980667	0.974333	0.981667	0.988333	0.961667	0.958	0.977	0.961	0.952333	0.982	0.972	0.954667	0.968	0.969333	0.967333
900	0.995	0.991667	0.980333	0.980667	0.974333	0.981667	0.988333	0.961667	0.957667	0.977	0.961	0.952333	0.982	0.971667	0.954333	0.968	0.969333	0.967
901	0.995	0.991667	0.980333	0.980667	0.974333	0.981667	0.988	0.961667	0.957667	0.977	0.961	0.952333	0.982	0.971667	0.954333	0.968	0.969	0.967
902	0.995	0.991667	0.980333	0.980667	0.974333	0.981667	0.988	0.961667	0.957667	0.977	0.961	0.952333	0.982	0.971667	0.954333	0.968	0.969	0.967
903	0.995	0.991667	0.980333	0.980667	0.974333	0.981667	0.988	0.961667	0.957667	0.976667	0.961	0.952333	0.982	0.971667	0.954333	0.968	0.969	0.967
904	0.995	0.991667	0.980333	0.980667	0.974333	0.981667	0.988	0.961667	0.957667	0.976667	0.961	0.952333	0.982	0.971667	0.954333	0.968	0.969	0.967
905	0.995	0.991667	0.980333	0.980667	0.974333	0.981667	0.988	0.961667	0.957667	0.976667	0.960667	0.952	0.982	0.971667	0.954333	0.967667	0.969	0.967
906	0.995	0.991667	0.980333	0.980667	0.974	0.981667	0.988	0.961667	0.957667	0.976667	0.960667	0.952	0.982	0.971333	0.954	0.967667	0.969	0.966667
907	0.995	0.991667	0.980333	0.980667	0.974	0.981667	0.988	0.961333	0.957333	0.976667	0.960667	0.952	0.982	0.971333	0.954	0.967667	0.969	0.966667
908	0.995	0.991667	0.980333	0.980667	0.974	0.981667	0.988	0.961333	0.957333	0.976667	0.960667	0.952	0.981667	0.971333	0.954	0.967667	0.969	0.966667
909	0.995	0.991333	0.980333	0.980667	0.974	0.981667	0.988	0.961333	0.957333	0.976667	0.960667	0.952	0.981667	0.971333	0.954	0.967667	0.969	0.966667
910	0.995	0.991333	0.98	0.980667	0.974	0.981333	0.988	0.961333	0.957333	0.976667	0.960667	0.952	0.981667	0.971333	0.954	0.967333	0.968667	0.966667
911	0.995	0.991333	0.98	0.980667	0.974	0.981333	0.988	0.961333	0.957333	0.976333	0.960667	0.952	0.981667	0.971333	0.954	0.967333	0.968667	0.966667
912	0.995	0.991333	0.98	0.980667	0.974	0.981333	0.988	0.961333	0.957333	0.976333	0.960667	0.952	0.981667	0.971333	0.954	0.967333	0.968667	0.966667
913	0.995	0.991333	0.98	0.980333	0.974	0.981333	0.988	0.961333	0.957	0.976333	0.960667	0.951667	0.981667	0.971333	0.953667	0.967333	0.968667	0.966667
914	0.995	0.991333	0.98	0.980333	0.973667	0.981333	0.987667	0.961	0.957	0.976333	0.960333	0.951667	0.981667	0.971	0.953667	0.967333	0.968667	0.966667
915	0.995	0.991333	0.98	0.980333	0.973667	0.981333	0.987667	0.961	0.957	0.976333	0.960333	0.951667	0.981667	0.971	0.953667	0.967333	0.968667	0.966333
916	0.995	0.991333	0.98	0.980333	0.973667	0.981333	0.987667	0.961	0.957	0.976333	0.960333	0.951667	0.981667	0.971	0.953667	0.967	0.968667	0.966333
917	0.995	0.991333	0.98	0.980333	0.973667	0.981333	0.987667	0.961	0.957	0.976	0.960333	0.951667	0.981667	0.971	0.953667	0.967	0.968667	0.966333
918	0.995	0.991333	0.98	0.980333	0.973667	0.981333	0.987667	0.961	0.956667	0.976	0.960333	0.951667	0.981333	0.971	0.953667	0.967	0.968333	0.966333
919	0.995	0.991333	0.98	0.980333	0.973667	0.981333	0.987667	0.961	0.956667	0.976	0.960333	0.951667	0.981333	0.971	0.953667	0.967	0.968333	0.966333
920	0.995	0.991333	0.98	0.980333	0.973667	0.981333	0.987667	0.961	0.956667	0.976	0.960333	0.951667	0.981333	0.971	0.953333	0.967	0.968333	0.966333
921	0.995	0.991333	0.98	0.980333	0.973667	0.981333	0.987667	0.961	0.956667	0.976	0.96	0.951667	0.981333	0.971	0.953333	0.967	0.968333	0.966333
922	0.995	0.991333	0.979667	0.98	0.973667	0.981	0.987667	0.961	0.956667	0.976	0.96	0.951333	0.981333	0.970667	0.953333	0.966667	0.968333	0.966333
923	0.995	0.991333	0.979667	0.98	0.973667	0.981	0.987333	0.961	0.956667	0.976	0.96	0.951333	0.981333	0.970667	0.953333	0.966667	0.968333	0.966
924	0.995	0.991333	0.979667	0.98	0.973667	0.981	0.987333	0.961	0.956667	0.976	0.96	0.951333	0.981333	0.970667	0.953333	0.966667	0.968333	0.966
925	0.995	0.991333	0.979667	0.98	0.973333	0.981	0.987333	0.961	0.956333	0.976	0.96	0.951333	0.981	0.970667	0.953333	0.966667	0.968333	0.966
926	0.995	0.991	0.979667	0.98	0.973333	0.981	0.987333	0.961	0.956333	0.976	0.96	0.951333	0.981	0.970667	0.953333	0.966667	0.968	0.966
927	0.995	0.991	0.979667	0.98	0.973333	0.981	0.987333	0.961	0.956333	0.975667	0.96	0.951333	0.981	0.970667	0.953333	0.966667	0.968	0.966
929	0.995	0.991	0.979667	0.98	0.973333	0.981	0.987333	0.961	0.956333	0.975667	0.959667	0.951333	0.981	0.970667	0.953333	0.966667	0.968	0.965667
930	0.994667	0.991	0.979667	0.98	0.973333	0.981	0.987333	0.960667	0.956333	0.975667	0.959667	0.951333	0.981	0.970333	0.953	0.966667	0.968	0.965667
931	0.994667	0.991	0.979667	0.979667	0.973333	0.981	0.987333	0.960667	0.956333	0.975667	0.959667	0.951333	0.980667	0.970333	0.953	0.966333	0.968	0.965667
932	0.994667	0.991	0.979667	0.979667	0.973333	0.981	0.987333	0.960667	0.956333	0.975667	0.959667	0.951333	0.980667	0.970333	0.953	0.966333	0.968	0.965667
933	0.994667	0.991	0.979667	0.979667	0.973333	0.981	0.987	0.960667	0.956333	0.975667	0.959667	0.951333	0.980667	0.970333	0.953	0.966333	0.968	0.965667
934	0.994667	0.991	0.979667	0.979667	0.973333	0.981	0.987	0.960667	0.956	0.975667	0.959667	0.951333	0.980667	0.970333	0.953	0.966333	0.967667	0.965667
935	0.994667	0.991	0.979667	0.979667	0.973333	0.981	0.987	0.960667	0.956	0.975667	0.959667	0.951	0.980667	0.970333	0.953	0.966333	0.967667	0.965667
936	0.994667	0.991	0.979667	0.979667	0.973333	0.980667	0.987	0.960667	0.956	0.975667	0.959667	0.951	0.980667	0.970333	0.953	0.966333	0.967667	0.965333
937	0.994667	0.991	0.979667	0.979667	0.973333	0.980667	0.987	0.960667	0.956	0.975667	0.959333	0.951	0.980667	0.97	0.952667	0.966333	0.967667	0.965333
938	0.994667	0.991	0.979667	0.979667	0.973333	0.980667	0.987	0.960667	0.956	0.975333	0.959333	0.951	0.980333	0.97	0.952667	0.966	0.967667	0.965333
939	0.994667	0.991	0.979667	0.979667	0.973333	0.980667	0.987	0.960667	0.956	0.975333	0.959333	0.951	0.980333	0.97	0.952667	0.966	0.967667	0.965333
940	0.994667	0.991	0.979667	0.979333	0.973	0.980667	0.987	0.960333	0.955667	0.975333	0.959333	0.951	0.980333	0.97	0.952667	0.966	0.967667	0.965333
941	0.994667	0.991	0.979667	0.979333	0.973	0.980667	0.987	0.960333	0.955667	0.975333	0.959333	0.951	0.980333	0.97	0.952667	0.966	0.967667	0.965333
942	0.994667	0.991	0.979667	0.979333	0.973	0.980667	0.987	0.960333	0.955667	0.975333	0.959333	0.951	0.980333	0.97	0.952667	0.966	0.967333	0.965333
943	0.994333	0.991	0.979667	0.979333	0.973	0.980667	0.986667	0.960333	0.955667	0.975333	0.959333	0.951	0.980333	0.97	0.952667	0.966	0.967333	0.965
944	0.994333	0.991	0.979333	0.979333	0.973	0.980667	0.986667	0.960333	0.955667	0.975333	0.959333	0.950667	0.980333	0.97	0.952333	0.965667	0.967333	0.965
945	0.994333	0.991	0.979333	0.979333	0.973	0.980667	0.986667	0.960333	0.955667	0.975333	0.959	0.950667	0.980333	0.969667	0.952333	0.965667	0.967333	0.965
946	0.994333	0.991	0.979333	0.979333	0.973	0.980667	0.986667	0.960333	0.955667	0.975	0.959	0.950667	0.98	0.969667	0.952333	0.965667	0.967333	0.965
947	0.994333	0.991	0.979333	0.979333	0.972667	0.980667	0.986667	0.96	0.955667	0.975	0.959	0.950667	0.98	0.969667	0.952333	0.965667	0.967333	0.965
948	0.994333	0.991	0.979333	0.979	0.972667	0.980333	0.986667	0.96	0.955333	0.975	0.959	0.950667	0.98	0.969667	0.952333	0.965667	0.967333	0.965
949	0.994333	0.991	0.979333	0.979	0.972667	0.980333	0.986667	0.96	0.955333	0.975	0.959	0.950667	0.98	0.969667	0.952333	0.965667	0.967333	0.965
950	0.994333	0.991	0.979333	0.979	0.972667	0.980333	0.986667	0.96	0.955333	0.975	0.959	0.950667	0.98	0.969667	0.952333	0.965333	0.967	0.965
951	0.994333	0.991	0.979333	0.979	0.972667	0.980333	0.986667	0.96	0.955333	0.975	0.959	0.950667	0.98	0.969667	0.952	0.965333	0.967	0.965
952	0.994333	0.991	0.979333	0.979	0.972667	0.980333	0.986667	0.96	0.955333	0.975	0.959	0.950667	0.98	0.969667	0.952	0.965333	0.967	0.964667
953	0.994333	0.991	0.979333	0.978667	0.972667	0.980333	0.986667	0.959667	0.955333	0.975	0.958667	0.950667	0.98	0.969667	0.952	0.965333	0.967	0.964667
954	0.994333	0.991	0.979	0.978667	0.972667	0.980333	0.986667	0.959667	0.955333	0.975	0.958667	0.950667	0.979667	0.969333	0.952	0.965333	0.967	0.964667
955	0.994333	0.991	0.979	0.978667	0.972333	0.980333	0.986667	0.959667	0.955333	0.974667	0.958667	0.950333	0.979667	0.969333	0.952	0.965	0.967	0.964667
956	0.994333	0.991	0.979	0.978667	0.972333	0.980333	0.986667	0.959667	0.955	0.974667	0.958667	0.950333	0.979667	0.969333	0.952	0.965	0.967	0.964667
957	0.994333	0.991	0.979	0.978667	0.972333	0.980333	0.986667	0.959667	0.955	0.974667	0.958667	0.950333	0.979667	0.969333	0.952	0.965	0.967	0.964667
958	0.994333	0.991	0.979	0.978667	0.972333	0.980333	0.986667	0.959667	0.955	0.974667	0.958667	0.950333	0.979667	0.969333	0.951667	0.965	0.966667	0.964667
959	0.994333	0.991	0.979	0.978667	0.972333	0.980333	0.986667	0.959667	0.955	0.974667	0.958667	0.950333	0.979667	0.969333	0.951667	0.965	0.966667	0.964667
960	0.994333	0.991	0.979	0.978333	0.972333	0.980333	0.986667	0.959333	0.955	0.974667	0.958667	0.950333	0.979667	0.969333	0.951667	0.965	0.966667	0.964333
961	0.994333	0.991	0.979	0.978333	0.972333	0.980333	0.986333	0.959333	0.955	0.974667	0.958667	0.950333	0.979333	0.969	0.951667	0.964667	0.966667	0.964333
962	0.994333	0.990667	0.979	0.978333	0.972333	0.98	0.986333	0.959333	0.954667	0.974667	0.958667	0.950333	0.979333	0.969	0.951667	0.964667	0.966667	0.964333
963	0.994333	0.990667	0.979	0.978333	0.972333	0.98	0.986333	0.959333	0.954667	0.974667	0.958333	0.95	0.979333	0.969	0.951667	0.964667	0.966667	0.964333
964	0.994333	0.990667	0.979	0.978333	0.972	0.98	0.986333	0.959333	0.954667	0.974667	0.958333	0.95	0.979333	0.969	0.951667	0.964667	0.966667	0.964333
965	0.994333	0.990667	0.979	0.978333	0.972	0.98	0.986333	0.959333	0.954667	0.974667	0.958333	0.95	0.979333	0.969	0.951667	0.964667	0.966333	0.964333
966	0.994333	0.990667	0.978667	0.978333	0.972	0.98	0.986333	0.959333	0.954667	0.974333	0.958333	0.95	0.979333	0.969	0.951333	0.964667	0.966333	0.964333
967	0.994333	0.990667	0.978667	0.978333	0.972	0.98	0.986333	0.959333	0.954667	0.974333	0.958333	0.95	0.979333	0.968667	0.951333	0.964667	0.966333	0.964333
968	0.994333	0.990667	0.978667	0.978333	0.972	0.98	0.986333	0.959333	0.954667	0.974333	0.958333	0.95	0.979	0.968667	0.951333	0.964333	0.966333	0.964333
969	0.994	0.990667	0.978667	0.978333	0.972	0.98	0.986333	0.959	0.954667	0.974333	0.958333	0.95	0.979	0.968667	0.951333	0.964333	0.966333	0.964
970	0.994	0.990667	0.978667	0.978	0.972	0.98	0.986333	0.959	0.954333	0.974333	0.958333	0.95	0.979	0.968667	0.951333	0.964333	0.966333	0.964
971	0.994	0.990667	0.978667	0.978	0.971667	0.98	0.986333	0.959	0.954333	0.974333	0.958	0.95	0.979	0.968667	0.951333	0.964333	0.966333	0.964
972	0.994	0.990667	0.978667	0.978	0.971667	0.98	0.986333	0.959	0.954333	0.974333	0.958	0.949667	0.979	0.968667	0.951333	0.964333	0.966	0.964
973	0.994	0.990667	0.978667	0.978	0.971667	0.98	0.986	0.959	0.954333	0.974333	0.958	0.949667	0.979	0.968667	0.951	0.964333	0.966	0.964
974	0.994	0.990667	0.978667	0.978	0.971667	0.98	0.986	0.959	0.954333	0.974	0.958	0.949667	0.979	0.968667	0.951	0.964333	0.966	0.964
975	0.994	0.990333	0.978667	0.978	0.971667	0.98	0.986	0.959	0.954333	0.974	0.958	0.949667	0.979	0.968667	0.951	0.964	0.966	0.964
976	0.994	0.990333	0.978667	0.978	0.971667	0.979667	0.986	0.959	0.954333	0.974	0.958	0.949667	0.978667	0.968333	0.951	0.964	0.966	0.963667
977	0.994	0.990333	0.978667	0.978	0.971667	0.979667	0.986	0.959	0.954333	0.974	0.958	0.949667	0.978667	0.968333	0.951	0.964	0.966	0.963667
978	0.994	0.990333	0.978667	0.978	0.971333	0.979667	0.986	0.959	0.954333	0.974	0.958	0.949667	0.978667	0.968333	0.951	0.964	0.966	0.963667
979	0.994	0.990333	0.978667	0.978	0.971333	0.979667	0.986	0.958667	0.954	0.974	0.958	0.949667	0.978667	0.968333	0.951	0.964	0.966	0.963667
980	0.994	0.990333	0.978667	0.978	0.971333	0.979667	0.986	0.958667	0.954	0.974	0.958	0.949667	0.978667	0.968333	0.951	0.964	0.965667	0.963667
981	0.994	0.990333	0.978667	0.978	0.971333	0.979667	0.986	0.958667	0.954	0.974	0.957667	0.949333	0.978667	0.968333	0.950667	0.964	0.965667	0.963667
983	0.994	0.990333	0.978667	0.978	0.971333	0.979667	0.986	0.958667	0.954	0.973667	0.957667	0.949333	0.978667	0.968333	0.950667	0.963667	0.965667	0.963333
984	0.994	0.990333	0.978667	0.977667	0.971333	0.979667	0.986	0.958667	0.954	0.973667	0.957667	0.949333	0.978667	0.968	0.950667	0.963667	0.965667	0.963333
985	0.994	0.990333	0.978667	0.977667	0.971333	0.979667	0.986	0.958667	0.954	0.973667	0.957667	0.949333	0.978667	0.968	0.950667	0.963667	0.965667	0.963333
986	0.994	0.990333	0.978667	0.977667	0.971333	0.979667	0.986	0.958667	0.954	0.973667	0.957667	0.949333	0.978667	0.968	0.950667	0.963667	0.965667	0.963333
987	0.994	0.990333	0.978667	0.977667	0.971333	0.979667	0.986	0.958333	0.954	0.973667	0.957667	0.949333	0.978333	0.968	0.950667	0.963667	0.965667	0.963333
988	0.994	0.990333	0.978333	0.977667	0.971333	0.979667	0.986	0.958333	0.954	0.973667	0.957667	0.949333	0.978333	0.968	0.950667	0.963667	0.965333	0.963333
989	0.994	0.990333	0.978333	0.977667	0.971	0.979667	0.986	0.958333	0.953667	0.973667	0.957667	0.949333	0.978333	0.968	0.950667	0.963667	0.965333	0.963333
990	0.994	0.990333	0.978333	0.977667	0.971	0.979333	0.986	0.958333	0.953667	0.973667	0.957667	0.949	0.978333	0.968	0.950667	0.963333	0.965333	0.963
991	0.994	0.990333	0.978333	0.977667	0.971	0.979333	0.985667	0.958333	0.953667	0.973667	0.957667	0.949	0.978333	0.967667	0.950333	0.963333	0.965333	0.963
992	0.994	0.990333	0.978333	0.977667	0.971	0.979333	0.985667	0.958333	0.953667	0.973667	0.957667	0.949	0.978333	0.967667	0.950333	0.963333	0.965333	0.963
993	0.994	0.990333	0.978333	0.977667	0.971	0.979333	0.985667	0.958333	0.953667	0.973667	0.957333	0.949	0.978	0.967667	0.950333	0.963333	0.965333	0.963
994	0.994	0.990333	0.978333	0.977667	0.971	0.979333	0.985667	0.958333	0.953667	0.973667	0.957333	0.949	0.978	0.967667	0.950333	0.963333	0.965333	0.963
995	0.994	0.990333	0.978333	0.977667	0.971	0.979333	0.985667	0.958	0.953667	0.973333	0.957333	0.949	0.978	0.967667	0.950333	0.963333	0.965333	0.963
996	0.994	0.99	0.978333	0.977333	0.971	0.979333	0.985667	0.958	0.953667	0.973333	0.957333	0.949	0.978	0.967667	0.950333	0.963333	0.965	0.963
997	0.994	0.99	0.978333	0.977333	0.971	0.979333	0.985667	0.958	0.953333	0.973333	0.957333	0.949	0.978	0.967667	0.950333	0.963	0.965	0.963
998	0.994	0.99	0.978333	0.977333	0.971	0.979333	0.985667	0.958	0.953333	0.973333	0.957333	0.948667	0.978	0.967667	0.950333	0.963	0.965	0.963
999	0.994	0.99	0.978333	0.977333	0.971	0.979333	0.985667	0.958	0.953333	0.973333	0.957333	0.948667	0.978	0.967667	0.950333	0.963	0.965	0.962667
1000	0.994	0.99	0.978	0.977333	0.971	0.979333	0.985667	0.958	0.953333	0.973333	0.957333	0.948667	0.977667	0.967667	0.950333	0.963	0.965	0.962667
1001	0.994	0.99	0.978	0.977333	0.971	0.979333	0.985667	0.958	0.953333	0.973333	0.957	0.948667	0.977667	0.967667	0.950333	0.963	0.965	0.962667
1002	0.994	0.99	0.978	0.977333	0.971	0.979333	0.985667	0.958	0.953333	0.973	0.957	0.948667	0.977667	0.967667	0.950333	0.963	0.965	0.962667
1003	0.994	0.99	0.978	0.977333	0.971	0.979	0.985667	0.958	0.953333	0.973	0.957	0.948667	0.977667	0.967333	0.950333	0.963	0.965	0.962667
1004	0.994	0.99	0.978	0.977333	0.970667	0.979	0.985333	0.958	0.953333	0.973	0.957	0.948667	0.977667	0.967333	0.95	0.962667	0.965	0.962667
1005	0.994	0.99	0.978	0.977	0.970667	0.979	0.985333	0.957667	0.953333	0.973	0.957	0.948667	0.977667	0.967333	0.95	0.962667	0.964667	0.962667
1006	0.994	0.99	0.978	0.977	0.970667	0.979	0.985333	0.957667	0.953333	0.973	0.957	0.948667	0.977667	0.967333	0.95	0.962667	0.964667	0.962667
1007	0.994	0.99	0.978	0.977	0.970667	0.979	0.985333	0.957667	0.953	0.973	0.957	0.948333	0.977667	0.967333	0.95	0.962667	0.964667	0.962333
1008	0.994	0.99	0.978	0.977	0.970667	0.979	0.985333	0.957667	0.953	0.973	0.957	0.948333	0.977667	0.967333	0.95	0.962667	0.964667	0.962333
1009	0.994	0.99	0.978	0.977	0.970667	0.979	0.985333	0.957667	0.953	0.973	0.957	0.948333	0.977333	0.967333	0.95	0.962667	0.964667	0.962333
1010	0.994	0.99	0.978	0.977	0.970667	0.979	0.985333	0.957667	0.953	0.972667	0.956667	0.948333	0.977333	0.967	0.95	0.962667	0.964667	0.962333
1011	0.994	0.99	0.978	0.977	0.970667	0.979	0.985333	0.957667	0.953	0.972667	0.956667	0.948333	0.977333	0.967	0.95	0.962667	0.964667	0.962333
1012	0.994	0.989667	0.978	0.977	0.970667	0.979	0.985333	0.957667	0.953	0.972667	0.956667	0.948333	0.977333	0.967	0.949667	0.962333	0.964333	0.962333
1013	0.994	0.989667	0.978	0.977	0.970333	0.979	0.985333	0.957333	0.953	0.972667	0.956667	0.948	0.977333	0.967	0.949667	0.962333	0.964333	0.962333
1014	0.994	0.989667	0.978	0.976667	0.970333	0.979	0.985333	0.957333	0.952667	0.972667	0.956667	0.948	0.977333	0.967	0.949667	0.962333	0.964333	0.962
1015	0.994	0.989667	0.978	0.976667	0.970333	0.979	0.985333	0.957333	0.952667	0.972667	0.956667	0.948	0.977333	0.967	0.949667	0.962333	0.964333	0.962
1016	0.994	0.989667	0.978	0.976667	0.970333	0.979	0.985333	0.957333	0.952667	0.972667	0.956667	0.948	0.977	0.967	0.949667	0.962333	0.964333	0.962
1017	0.993667	0.989667	0.978	0.976667	0.970333	0.979	0.985333	0.957333	0.952667	0.972667	0.956667	0.948	0.977	0.967	0.949667	0.962333	0.964333	0.962
1018	0.993667	0.989667	0.978	0.976667	0.970333	0.979	0.985333	0.957333	0.952667	0.972667	0.956667	0.948	0.977	0.966667	0.949667	0.962333	0.964333	0.962
1019	0.993667	0.989667	0.978	0.976667	0.970333	0.978667	0.985333	0.957	0.952667	0.972667	0.956667	0.948	0.977	0.966667	0.949667	0.962	0.964333	0.962
1020	0.993667	0.989667	0.978	0.976667	0.970333	0.978667	0.985333	0.957	0.952667	0.972333	0.956333	0.947667	0.977	0.966667	0.949667	0.962	0.964333	0.961667
1021	0.993667	0.989667	0.977667	0.976333	0.970333	0.978667	0.985333	0.957	0.952333	0.972333	0.956333	0.947667	0.977	0.966667	0.949333	0.962	0.964	0.961667
1022	0.993667	0.989667	0.977667	0.976333	0.970333	0.978667	0.985333	0.957	0.952333	0.972333	0.956333	0.947667	0.977	0.966667	0.949333	0.962	0.964	0.961667
1023	0.993667	0.989667	0.977667	0.976333	0.97	0.978667	0.985333	0.957	0.952333	0.972333	0.956333	0.947667	0.976667	0.966667	0.949333	0.962	0.964	0.961667
1024	0.993667	0.989667	0.977667	0.976333	0.97	0.978667	0.985	0.957	0.952333	0.972333	0.956333	0.947667	0.976667	0.966667	0.949333	0.962	0.964	0.961667
1025	0.993667	0.989667	0.977667	0.976333	0.97	0.978667	0.985	0.957	0.952333	0.972333	0.956333	0.947667	0.976667	0.966667	0.949333	0.962	0.964	0.961667
1026	0.993667	0.989667	0.977667	0.976333	0.97	0.978667	0.985	0.957	0.952333	0.972333	0.956333	0.947667	0.976667	0.966667	0.949333	0.961667	0.964	0.961667
1027	0.993667	0.989667	0.977667	0.976333	0.97	0.978667	0.985	0.957	0.952333	0.972	0.956	0.947667	0.976667	0.966333	0.949333	0.961667	0.964	0.961667
1028	0.993667	0.989667	0.977667	0.976	0.97	0.978333	0.985	0.957	0.952333	0.972	0.956	0.947667	0.976667	0.966333	0.949333	0.961667	0.964	0.961333
1029	0.993667	0.989667	0.977667	0.976	0.97	0.978333	0.985	0.957	0.952333	0.972	0.956	0.947333	0.976333	0.966333	0.949333	0.961667	0.964	0.961333
1030	0.993667	0.989667	0.977667	0.976	0.97	0.978333	0.985	0.957	0.952	0.972	0.956	0.947333	0.976333	0.966333	0.949	0.961667	0.964	0.961333
1031	0.993667	0.989667	0.977667	0.976	0.97	0.978333	0.985	0.957	0.952	0.972	0.956	0.947333	0.976333	0.966333	0.949	0.961667	0.964	0.961333
1032	0.993667	0.989667	0.977333	0.976	0.969667	0.978333	0.984667	0.956667	0.952	0.972	0.956	0.947333	0.976333	0.966333	0.949	0.961333	0.963667	0.961333
1033	0.993667	0.989667	0.977333	0.976	0.969667	0.978333	0.984667	0.956667	0.952	0.972	0.956	0.947333	0.976333	0.966333	0.949	0.961333	0.963667	0.961333
1034	0.993667	0.989667	0.977333	0.976	0.969667	0.978333	0.984667	0.956667	0.952	0.971667	0.956	0.947333	0.976333	0.966333	0.949	0.961333	0.963667	0.961333
1035	0.993667	0.989667	0.977333	0.976	0.969667	0.978333	0.984667	0.956667	0.952	0.971667	0.955667	0.947333	0.976333	0.966333	0.949	0.961333	0.963667	0.961333
1036	0.993667	0.989667	0.977333	0.976	0.969667	0.978333	0.984667	0.956667	0.952	0.971667	0.955667	0.947333	0.976333	0.966	0.949	0.961333	0.963667	0.961333
1037	0.993667	0.989667	0.977333	0.976	0.969667	0.978333	0.984667	0.956667	0.952	0.971667	0.955667	0.947333	0.976	0.966	0.949	0.961333	0.963667	0.961
1038	0.993333	0.989667	0.977333	0.976	0.969667	0.978333	0.984667	0.956667	0.952	0.971667	0.955667	0.947333	0.976	0.966	0.948667	0.961	0.963333	0.961
1039	0.993333	0.989667	0.977333	0.976	0.969667	0.978333	0.984667	0.956667	0.952	0.971667	0.955667	0.947333	0.976	0.966	0.948667	0.961	0.963333	0.961
1040	0.993333	0.989667	0.977333	0.975667	0.969667	0.978333	0.984667	0.956333	0.951667	0.971667	0.955667	0.947333	0.976	0.966	0.948667	0.961	0.963333	0.961
1041	0.993333	0.989667	0.977333	0.975667	0.969667	0.978333	0.984333	0.956333	0.951667	0.971333	0.955667	0.947333	0.976	0.966	0.948667	0.961	0.963333	0.961
1042	0.993333	0.989667	0.977333	0.975667	0.969667	0.978333	0.984333	0.956333	0.951667	0.971333	0.955667	0.947333	0.976	0.966	0.948667	0.961	0.963333	0.961
1044	0.993333	0.989667	0.977	0.975667	0.969667	0.978333	0.984333	0.956333	0.951667	0.971333	0.955667	0.947	0.976	0.966	0.948667	0.961	0.963333	0.961
1045	0.993333	0.989667	0.977	0.975667	0.969333	0.978	0.984333	0.956333	0.951667	0.971333	0.955333	0.947	0.976	0.965667	0.948667	0.961	0.963	0.961
1046	0.993333	0.989667	0.977	0.975667	0.969333	0.978	0.984333	0.956333	0.951667	0.971333	0.955333	0.947	0.975667	0.965667	0.948667	0.961	0.963	0.960667
1047	0.993333	0.989667	0.977	0.975667	0.969333	0.978	0.984333	0.956333	0.951667	0.971333	0.955333	0.947	0.975667	0.965667	0.948667	0.961	0.963	0.960667
1048	0.993333	0.989667	0.977	0.975667	0.969333	0.978	0.984333	0.956333	0.951667	0.971333	0.955333	0.947	0.975667	0.965667	0.948333	0.961	0.963	0.960667
1049	0.993333	0.989333	0.977	0.975667	0.969333	0.978	0.984333	0.956333	0.951667	0.971333	0.955333	0.947	0.975667	0.965667	0.948333	0.961	0.963	0.960667
1050	0.993333	0.989333	0.977	0.975667	0.969333	0.978	0.984333	0.956	0.951667	0.971	0.955333	0.947	0.975667	0.965667	0.948333	0.961	0.963	0.960667
1051	0.993333	0.989333	0.977	0.975667	0.969333	0.978	0.984333	0.956	0.951667	0.971	0.955333	0.946667	0.975667	0.965667	0.948333	0.960667	0.963	0.960667
1052	0.993	0.989333	0.977	0.975667	0.969333	0.978	0.984	0.956	0.951333	0.971	0.955333	0.946667	0.975667	0.965667	0.948333	0.960667	0.962667	0.960667
1053	0.993	0.989333	0.977	0.975667	0.969	0.978	0.984	0.956	0.951333	0.971	0.955	0.946667	0.975333	0.965333	0.948333	0.960667	0.962667	0.960667
1054	0.993	0.989333	0.977	0.975667	0.969	0.978	0.984	0.956	0.951333	0.971	0.955	0.946667	0.975333	0.965333	0.948333	0.960667	0.962667	0.960667
1055	0.993	0.989333	0.977	0.975667	0.969	0.978	0.984	0.956	0.951333	0.971	0.955	0.946667	0.975333	0.965333	0.948	0.960667	0.962667	0.960667
1056	0.993	0.989333	0.977	0.975667	0.969	0.977667	0.984	0.956	0.951333	0.971	0.955	0.946667	0.975333	0.965333	0.948	0.960667	0.962667	0.960667
1057	0.993	0.989333	0.977	0.975667	0.969	0.977667	0.984	0.956	0.951333	0.971	0.955	0.946667	0.975333	0.965333	0.948	0.960667	0.962667	0.960333
1058	0.993	0.989333	0.977	0.975667	0.968667	0.977667	0.984	0.956	0.951333	0.971	0.955	0.946333	0.975333	0.965333	0.948	0.960667	0.962667	0.960333
1059	0.993	0.989333	0.977	0.975333	0.968667	0.977667	0.984	0.955667	0.951333	0.970667	0.955	0.946333	0.975333	0.965333	0.948	0.960333	0.962667	0.960333
1060	0.993	0.989333	0.977	0.975333	0.968667	0.977667	0.984	0.955667	0.951333	0.970667	0.954667	0.946333	0.975	0.965333	0.948	0.960333	0.962667	0.960333
1061	0.993	0.989333	0.977	0.975333	0.968667	0.977667	0.984	0.955667	0.951333	0.970667	0.954667	0.946333	0.975	0.965	0.948	0.960333	0.962667	0.960333
1062	0.992667	0.989333	0.977	0.975333	0.968667	0.977667	0.984	0.955667	0.951	0.970667	0.954667	0.946333	0.975	0.965	0.947667	0.960333	0.962333	0.960333
1063	0.992667	0.989333	0.977	0.975333	0.968667	0.977667	0.983667	0.955667	0.951	0.970667	0.954667	0.946333	0.975	0.965	0.947667	0.960333	0.962333	0.960333
1064	0.992667	0.989333	0.977	0.975333	0.968667	0.977667	0.983667	0.955667	0.951	0.970667	0.954667	0.946333	0.975	0.965	0.947667	0.960333	0.962333	0.960333
1065	0.992667	0.989333	0.977	0.975333	0.968333	0.977667	0.983667	0.955667	0.951	0.970667	0.954667	0.946333	0.975	0.965	0.947667	0.960333	0.962333	0.960333
1066	0.992667	0.989333	0.977	0.975333	0.968333	0.977667	0.983667	0.955667	0.951	0.970667	0.954667	0.946333	0.975	0.965	0.947667	0.96	0.962333	0.96
1067	0.992667	0.989333	0.977	0.975	0.968333	0.977667	0.983667	0.955667	0.951	0.970667	0.954667	0.946333	0.974667	0.965	0.947667	0.96	0.962333	0.96
1068	0.992667	0.989333	0.976667	0.975	0.968333	0.977667	0.983667	0.955333	0.951	0.970667	0.954333	0.946333	0.974667	0.965	0.947667	0.96	0.962333	0.96
1069	0.992667	0.989333	0.976667	0.975	0.968333	0.977667	0.983667	0.955333	0.950667	0.970667	0.954333	0.946	0.974667	0.964667	0.947667	0.96	0.962333	0.96
1070	0.992667	0.989333	0.976667	0.975	0.968333	0.977667	0.983667	0.955333	0.950667	0.970667	0.954333	0.946	0.974667	0.964667	0.947667	0.96	0.962	0.96
1071	0.992667	0.989333	0.976667	0.975	0.968333	0.977333	0.983667	0.955333	0.950667	0.970667	0.954333	0.946	0.974667	0.964667	0.947333	0.96	0.962	0.96
1072	0.992667	0.989333	0.976667	0.975	0.968333	0.977333	0.983667	0.955333	0.950667	0.970667	0.954333	0.946	0.974667	0.964667	0.947333	0.959667	0.962	0.96
1073	0.992667	0.989333	0.976667	0.975	0.968333	0.977333	0.983667	0.955333	0.950667	0.970333	0.954333	0.946	0.974667	0.964667	0.947333	0.959667	0.962	0.96
1074	0.992667	0.989	0.976667	0.975	0.968333	0.977333	0.983667	0.955333	0.950667	0.970333	0.954333	0.946	0.974333	0.964667	0.947333	0.959667	0.962	0.959667
1075	0.992333	0.989	0.976667	0.974667	0.968333	0.977333	0.983667	0.955333	0.950667	0.970333	0.954333	0.946	0.974333	0.964667	0.947333	0.959667	0.962	0.959667
1076	0.992333	0.989	0.976667	0.974667	0.968333	0.977333	0.983667	0.955333	0.950333	0.970333	0.954	0.946	0.974333	0.964667	0.947333	0.959667	0.962	0.959667
1077	0.992333	0.989	0.976667	0.974667	0.968333	0.977333	0.983667	0.955333	0.950333	0.970333	0.954	0.946	0.974333	0.964667	0.947333	0.959333	0.962	0.959667
1078	0.992333	0.989	0.976333	0.974667	0.968333	0.977333	0.983667	0.955	0.950333	0.970333	0.954	0.946	0.974333	0.964667	0.947333	0.959333	0.961667	0.959667
1079	0.992333	0.989	0.976333	0.974667	0.968333	0.977333	0.983667	0.955	0.950333	0.970333	0.954	0.946	0.974333	0.964333	0.947333	0.959333	0.961667	0.959667
1080	0.992333	0.989	0.976333	0.974667	0.968333	0.977333	0.983333	0.955	0.950333	0.970333	0.954	0.946	0.974333	0.964333	0.947	0.959333	0.961667	0.959333
1081	0.992333	0.989	0.976333	0.974667	0.968	0.977333	0.983333	0.955	0.950333	0.970333	0.954	0.945667	0.974333	0.964333	0.947	0.959333	0.961667	0.959333
1082	0.992333	0.989	0.976333	0.974667	0.968	0.977333	0.983333	0.955	0.950333	0.970333	0.954	0.945667	0.974333	0.964333	0.947	0.959333	0.961667	0.959333
1083	0.992333	0.989	0.976333	0.974667	0.968	0.977333	0.983333	0.955	0.95	0.97	0.954	0.945667	0.974	0.964333	0.947	0.959333	0.961667	0.959333
1084	0.992333	0.989	0.976333	0.974333	0.968	0.977333	0.983333	0.955	0.95	0.97	0.954	0.945667	0.974	0.964333	0.947	0.959333	0.961333	0.959333
1085	0.992333	0.989	0.976	0.974333	0.968	0.977333	0.983333	0.955	0.95	0.97	0.954	0.945667	0.974	0.964	0.947	0.959	0.961333	0.959333
1086	0.992333	0.989	0.976	0.974333	0.968	0.977333	0.983333	0.955	0.95	0.97	0.954	0.945667	0.974	0.964	0.947	0.959	0.961333	0.959333
1087	0.992333	0.989	0.976	0.974333	0.968	0.977	0.983333	0.955	0.95	0.97	0.954	0.945667	0.974	0.964	0.946667	0.959	0.961333	0.959333
1088	0.992333	0.989	0.976	0.974333	0.968	0.977	0.983333	0.955	0.95	0.97	0.953667	0.945667	0.974	0.964	0.946667	0.959	0.961333	0.959333
1089	0.992333	0.989	0.976	0.974333	0.967667	0.977	0.983333	0.954667	0.95	0.97	0.953667	0.945667	0.974	0.964	0.946667	0.959	0.961333	0.959
1090	0.992333	0.989	0.976	0.974333	0.967667	0.977	0.983333	0.954667	0.95	0.97	0.953667	0.945667	0.974	0.964	0.946667	0.959	0.961	0.959
1091	0.992333	0.989	0.976	0.974333	0.967667	0.977	0.983333	0.954667	0.949667	0.97	0.953667	0.945333	0.974	0.964	0.946667	0.959	0.961	0.959
1092	0.992333	0.989	0.976	0.974333	0.967667	0.977	0.983333	0.954667	0.949667	0.969667	0.953667	0.945333	0.973667	0.964	0.946667	0.959	0.961	0.959
1093	0.992333	0.989	0.976	0.974333	0.967667	0.977	0.983	0.954667	0.949667	0.969667	0.953667	0.945333	0.973667	0.963667	0.946667	0.958667	0.961	0.959
1094	0.992333	0.989	0.976	0.974333	0.967667	0.977	0.983	0.954667	0.949667	0.969667	0.953667	0.945333	0.973667	0.963667	0.946667	0.958667	0.961	0.959
1095	0.992333	0.989	0.976	0.974333	0.967667	0.977	0.983	0.954667	0.949667	0.969667	0.953667	0.945333	0.973667	0.963667	0.946667	0.958667	0.961	0.959
1096	0.992333	0.989	0.976	0.974333	0.967333	0.977	0.983	0.954667	0.949667	0.969667	0.953667	0.945333	0.973667	0.963667	0.946667	0.958667	0.961	0.959
1097	0.992333	0.989	0.976	0.974333	0.967333	0.977	0.983	0.954667	0.949667	0.969667	0.953667	0.945333	0.973667	0.963667	0.946667	0.958667	0.960667	0.959
1098	0.992333	0.989	0.976	0.974333	0.967333	0.977	0.983	0.954333	0.949667	0.969667	0.953333	0.945333	0.973667	0.963667	0.946333	0.958667	0.960667	0.959
1099	0.992333	0.989	0.975667	0.974333	0.967333	0.976667	0.983	0.954333	0.949667	0.969667	0.953333	0.945333	0.973333	0.963667	0.946333	0.958333	0.960667	0.959
1100	0.992333	0.989	0.975667	0.974333	0.967333	0.976667	0.983	0.954333	0.949667	0.969667	0.953333	0.945333	0.973333	0.963667	0.946333	0.958333	0.960667	0.958667
1101	0.992333	0.989	0.975667	0.974333	0.967333	0.976667	0.983	0.954333	0.949667	0.969667	0.953333	0.945	0.973333	0.963667	0.946333	0.958333	0.960667	0.958667
1102	0.992333	0.988667	0.975667	0.974	0.967333	0.976667	0.983	0.954333	0.949667	0.969333	0.953333	0.945	0.973333	0.963333	0.946333	0.958333	0.960667	0.958667
1103	0.992333	0.988667	0.975667	0.974	0.967333	0.976667	0.983	0.954333	0.949667	0.969333	0.953333	0.945	0.973333	0.963333	0.946333	0.958333	0.960667	0.958667
1104	0.992333	0.988667	0.975667	0.974	0.967333	0.976667	0.983	0.954333	0.949667	0.969333	0.953333	0.945	0.973333	0.963333	0.946333	0.958333	0.960333	0.958667
1105	0.992333	0.988667	0.975667	0.974	0.967	0.976667	0.982667	0.954333	0.949333	0.969333	0.953333	0.945	0.973333	0.963333	0.946333	0.958	0.960333	0.958667
1106	0.992	0.988667	0.975667	0.974	0.967	0.976667	0.982667	0.954333	0.949333	0.969333	0.953333	0.945	0.973	0.963333	0.946	0.958	0.960333	0.958667
1107	0.992	0.988667	0.975667	0.974	0.967	0.976667	0.982667	0.954333	0.949333	0.969333	0.953333	0.945	0.973	0.963333	0.946	0.958	0.960333	0.958333
1108	0.992	0.988667	0.975333	0.974	0.967	0.976667	0.982667	0.954333	0.949333	0.969333	0.953333	0.945	0.973	0.963333	0.946	0.958	0.960333	0.958333
1110	0.992	0.988667	0.975333	0.974	0.967	0.976333	0.982667	0.954333	0.949333	0.969333	0.953333	0.945	0.973	0.963333	0.946	0.958	0.960333	0.958333
1111	0.992	0.988667	0.975333	0.974	0.967	0.976333	0.982667	0.954	0.949333	0.969333	0.953333	0.944667	0.973	0.963	0.946	0.958	0.960333	0.958333
1112	0.992	0.988667	0.975333	0.974	0.967	0.976333	0.982667	0.954	0.949333	0.969333	0.953	0.944667	0.973	0.963	0.946	0.958	0.960333	0.958333
1113	0.992	0.988667	0.975333	0.974	0.967	0.976333	0.982333	0.954	0.949333	0.969	0.953	0.944667	0.972667	0.963	0.946	0.957667	0.96	0.958333
1114	0.992	0.988667	0.975333	0.973667	0.967	0.976333	0.982333	0.954	0.949333	0.969	0.953	0.944667	0.972667	0.963	0.946	0.957667	0.96	0.958
1115	0.992	0.988667	0.975333	0.973667	0.967	0.976333	0.982333	0.954	0.949333	0.969	0.953	0.944667	0.972667	0.963	0.946	0.957667	0.96	0.958
1116	0.992	0.988667	0.975333	0.973667	0.967	0.976333	0.982333	0.954	0.949	0.969	0.953	0.944667	0.972667	0.963	0.946	0.957667	0.96	0.958
1117	0.992	0.988667	0.975333	0.973667	0.966667	0.976333	0.982333	0.954	0.949	0.969	0.953	0.944667	0.972667	0.963	0.946	0.957667	0.96	0.958
1118	0.992	0.988667	0.975333	0.973667	0.966667	0.976333	0.982333	0.954	0.949	0.969	0.953	0.944667	0.972667	0.963	0.946	0.957667	0.96	0.958
1119	0.992	0.988667	0.975333	0.973667	0.966667	0.976333	0.982333	0.954	0.949	0.969	0.953	0.944333	0.972667	0.963	0.945667	0.957667	0.96	0.958
1120	0.992	0.988333	0.975333	0.973667	0.966667	0.976333	0.982333	0.954	0.949	0.969	0.953	0.944333	0.972667	0.962667	0.945667	0.957667	0.96	0.958
1121	0.992	0.988333	0.975333	0.973667	0.966667	0.976333	0.982333	0.953667	0.949	0.969	0.952667	0.944333	0.972667	0.962667	0.945667	0.957333	0.96	0.957667
1122	0.992	0.988333	0.975333	0.973667	0.966667	0.976	0.982333	0.953667	0.949	0.969	0.952667	0.944333	0.972333	0.962667	0.945667	0.957333	0.96	0.957667
1123	0.992	0.988333	0.975	0.973667	0.966667	0.976	0.982333	0.953667	0.949	0.968667	0.952667	0.944333	0.972333	0.962667	0.945667	0.957333	0.959667	0.957667
1124	0.992	0.988333	0.975	0.973667	0.966667	0.976	0.982333	0.953667	0.949	0.968667	0.952667	0.944333	0.972333	0.962667	0.945667	0.957333	0.959667	0.957667
1125	0.992	0.988333	0.975	0.973333	0.966667	0.976	0.982	0.953667	0.948667	0.968667	0.952667	0.944333	0.972333	0.962667	0.945667	0.957333	0.959667	0.957667
1126	0.992	0.988333	0.975	0.973333	0.966333	0.976	0.982	0.953667	0.948667	0.968667	0.952667	0.944333	0.972333	0.962667	0.945333	0.957333	0.959667	0.957667
1127	0.992	0.988333	0.975	0.973333	0.966333	0.976	0.982	0.953667	0.948667	0.968667	0.952667	0.944333	0.972333	0.962667	0.945333	0.957333	0.959667	0.957667
1128	0.992	0.988333	0.975	0.973333	0.966333	0.976	0.982	0.953667	0.948667	0.968667	0.952667	0.944	0.972333	0.962667	0.945333	0.957	0.959667	0.957667
1129	0.992	0.988333	0.975	0.973333	0.966333	0.976	0.982	0.953667	0.948667	0.968667	0.952333	0.944	0.972	0.962667	0.945333	0.957	0.959667	0.957333
1130	0.992	0.988333	0.975	0.973333	0.966333	0.976	0.982	0.953667	0.948667	0.968667	0.952333	0.944	0.972	0.962667	0.945333	0.957	0.959667	0.957333
1131	0.992	0.988333	0.975	0.973333	0.966333	0.976	0.982	0.953667	0.948667	0.968333	0.952333	0.944	0.972	0.962333	0.945333	0.957	0.959333	0.957333
1132	0.992	0.988333	0.975	0.973333	0.966333	0.975667	0.982	0.953667	0.948667	0.968333	0.952333	0.944	0.972	0.962333	0.945333	0.957	0.959333	0.957333
1133	0.991667	0.988333	0.975	0.973333	0.966333	0.975667	0.982	0.953333	0.948667	0.968333	0.952333	0.944	0.972	0.962333	0.945333	0.957	0.959333	0.957333
1134	0.991667	0.988333	0.975	0.973333	0.966333	0.975667	0.981667	0.953333	0.948667	0.968333	0.952333	0.944	0.972	0.962333	0.945333	0.957	0.959333	0.957333
1135	0.991667	0.988	0.975	0.973333	0.966333	0.975667	0.981667	0.953333	0.948333	0.968333	0.952333	0.944	0.972	0.962333	0.945333	0.956667	0.959333	0.957333
1136	0.991667	0.988	0.975	0.973333	0.966333	0.975667	0.981667	0.953333	0.948333	0.968333	0.952333	0.944	0.971667	0.962333	0.945	0.956667	0.959333	0.957333
1137	0.991667	0.988	0.975	0.973333	0.966333	0.975667	0.981667	0.953333	0.948333	0.968333	0.952333	0.944	0.971667	0.962333	0.945	0.956667	0.959	0.957333
1138	0.991667	0.988	0.975	0.973333	0.966333	0.975667	0.981667	0.953333	0.948333	0.968333	0.952	0.944	0.971667	0.962333	0.945	0.956667	0.959	0.957333
1139	0.991667	0.988	0.975	0.973333	0.966333	0.975667	0.981667	0.953333	0.948333	0.968333	0.952	0.944	0.971667	0.962333	0.945	0.956667	0.959	0.957333
1140	0.991667	0.988	0.975	0.973333	0.966	0.975667	0.981667	0.953333	0.948333	0.968333	0.952	0.944	0.971667	0.962333	0.945	0.956667	0.959	0.957333
1141	0.991667	0.988	0.975	0.973333	0.966	0.975667	0.981667	0.953333	0.948333	0.968	0.952	0.943667	0.971667	0.962333	0.945	0.956667	0.959	0.957333
1142	0.991667	0.988	0.974667	0.973333	0.966	0.975667	0.981667	0.953333	0.948333	0.968	0.952	0.943667	0.971667	0.962333	0.945	0.956333	0.959	0.957
1143	0.991667	0.988	0.974667	0.973333	0.966	0.975667	0.981667	0.953333	0.948	0.968	0.952	0.943667	0.971667	0.962	0.945	0.956333	0.959	0.957
1144	0.991667	0.988	0.974667	0.973	0.966	0.975667	0.981667	0.953	0.948	0.968	0.952	0.943667	0.971667	0.962	0.945	0.956333	0.959	0.957
1145	0.991667	0.988	0.974667	0.973	0.966	0.975667	0.981667	0.953	0.948	0.968	0.952	0.943667	0.971667	0.962	0.945	0.956333	0.958667	0.957
1146	0.991667	0.988	0.974667	0.973	0.966	0.975667	0.981667	0.953	0.948	0.968	0.952	0.943667	0.971667	0.962	0.945	0.956333	0.958667	0.957
1147	0.991667	0.988	0.974667	0.973	0.966	0.975667	0.981667	0.953	0.948	0.968	0.952	0.943667	0.971667	0.962	0.944667	0.956333	0.958667	0.957
1148	0.991667	0.988	0.974667	0.973	0.966	0.975667	0.981667	0.953	0.948	0.968	0.951667	0.943667	0.971667	0.962	0.944667	0.956333	0.958667	0.957
1149	0.991667	0.988	0.974667	0.973	0.966	0.975667	0.981333	0.953	0.948	0.967667	0.951667	0.943667	0.971667	0.962	0.944667	0.956333	0.958667	0.957
1150	0.991667	0.988	0.974667	0.973	0.965667	0.975667	0.981333	0.953	0.948	0.967667	0.951667	0.943667	0.971667	0.962	0.944667	0.956333	0.958667	0.957
1151	0.991667	0.988	0.974667	0.973	0.965667	0.975667	0.981333	0.953	0.948	0.967667	0.951667	0.943333	0.971333	0.962	0.944667	0.956	0.958667	0.957
1152	0.991667	0.988	0.974667	0.973	0.965667	0.975667	0.981333	0.953	0.948	0.967667	0.951667	0.943333	0.971333	0.962	0.944667	0.956	0.958667	0.957
1153	0.991667	0.987667	0.974667	0.973	0.965667	0.975667	0.981333	0.952667	0.948	0.967667	0.951667	0.943333	0.971333	0.962	0.944667	0.956	0.958667	0.957
1154	0.991667	0.987667	0.974667	0.973	0.965667	0.975333	0.981333	0.952667	0.947667	0.967667	0.951667	0.943333	0.971333	0.961667	0.944333	0.956	0.958667	0.956667
1155	0.991667	0.987667	0.974667	0.973	0.965667	0.975333	0.981333	0.952667	0.947667	0.967667	0.951667	0.943333	0.971333	0.961667	0.944333	0.956	0.958667	0.956667
1156	0.991667	0.987667	0.974667	0.973	0.965667	0.975333	0.981333	0.952667	0.947667	0.967667	0.951667	0.943333	0.971333	0.961667	0.944333	0.956	0.958667	0.956667
1157	0.991667	0.987667	0.974667	0.973	0.965667	0.975333	0.981333	0.952667	0.947667	0.967667	0.951667	0.943333	0.971333	0.961667	0.944333	0.956	0.958333	0.956667
1158	0.991667	0.987667	0.974333	0.973	0.965667	0.975333	0.981333	0.952667	0.947667	0.967333	0.951667	0.943333	0.971333	0.961667	0.944333	0.955667	0.958333	0.956667
1159	0.991667	0.987667	0.974333	0.973	0.965333	0.975333	0.981	0.952667	0.947667	0.967333	0.951333	0.943333	0.971333	0.961667	0.944333	0.955667	0.958333	0.956667
1160	0.991667	0.987667	0.974333	0.972667	0.965333	0.975333	0.981	0.952667	0.947667	0.967333	0.951333	0.943333	0.971	0.961667	0.944333	0.955667	0.958333	0.956667
1161	0.991667	0.987667	0.974333	0.972667	0.965333	0.975333	0.981	0.952667	0.947667	0.967333	0.951333	0.943	0.971	0.961667	0.944333	0.955667	0.958333	0.956667
1162	0.991667	0.987667	0.974333	0.972667	0.965333	0.975333	0.981	0.952667	0.947333	0.967333	0.951333	0.943	0.971	0.961667	0.944333	0.955667	0.958333	0.956333
1163	0.991667	0.987667	0.974333	0.972667	0.965333	0.975	0.981	0.952667	0.947333	0.967333	0.951333	0.943	0.971	0.961333	0.944333	0.955667	0.958333	0.956333
1164	0.991333	0.987667	0.974333	0.972667	0.965333	0.975	0.981	0.952667	0.947333	0.967333	0.951333	0.943	0.971	0.961333	0.944333	0.955333	0.958333	0.956333
1165	0.991333	0.987667	0.974333	0.972667	0.965333	0.975	0.981	0.952667	0.947333	0.967333	0.951333	0.943	0.971	0.961333	0.944	0.955333	0.958333	0.956333
1166	0.991333	0.987667	0.974333	0.972667	0.965333	0.975	0.981	0.952333	0.947333	0.967333	0.951333	0.943	0.971	0.961333	0.944	0.955333	0.958	0.956333
1167	0.991333	0.987667	0.974333	0.972667	0.965333	0.975	0.981	0.952333	0.947333	0.967333	0.951333	0.943	0.971	0.961333	0.944	0.955333	0.958	0.956333
1168	0.991333	0.987667	0.974333	0.972667	0.965333	0.975	0.981	0.952333	0.947333	0.967333	0.951	0.943	0.971	0.961333	0.944	0.955333	0.958	0.956333
1169	0.991333	0.987667	0.974333	0.972667	0.965	0.975	0.980667	0.952333	0.947333	0.967	0.951	0.943	0.971	0.961333	0.944	0.955333	0.958	0.956333
1170	0.991333	0.987667	0.974333	0.972333	0.965	0.975	0.980667	0.952333	0.947333	0.967	0.951	0.943	0.971	0.961333	0.944	0.955	0.958	0.956
1171	0.991333	0.987667	0.974333	0.972333	0.965	0.975	0.980667	0.952333	0.947333	0.967	0.951	0.943	0.971	0.961333	0.944	0.955	0.958	0.956
1172	0.991333	0.987333	0.974333	0.972333	0.965	0.975	0.980667	0.952333	0.947	0.967	0.951	0.942667	0.970667	0.961333	0.944	0.955	0.958	0.956
1173	0.991333	0.987333	0.974333	0.972333	0.965	0.975	0.980667	0.952333	0.947	0.967	0.951	0.942667	0.970667	0.961	0.944	0.955	0.958	0.956
1174	0.991333	0.987333	0.974333	0.972333	0.965	0.975	0.980667	0.952333	0.947	0.967	0.951	0.942667	0.970667	0.961	0.943667	0.955	0.958	0.956
1175	0.991333	0.987333	0.974333	0.972333	0.965	0.975	0.980667	0.952	0.947	0.967	0.951	0.942667	0.970667	0.961	0.943667	0.955	0.957667	0.956
1176	0.991333	0.987333	0.974333	0.972333	0.965	0.975	0.980667	0.952	0.947	0.967	0.951	0.942667	0.970667	0.961	0.943667	0.955	0.957667	0.956
1178	0.991333	0.987333	0.974333	0.972333	0.965	0.975	0.980667	0.952	0.947	0.967	0.951	0.942667	0.970667	0.961	0.943667	0.955	0.957667	0.956
1179	0.991333	0.987333	0.974333	0.972333	0.965	0.975	0.980667	0.952	0.947	0.967	0.951	0.942667	0.970333	0.961	0.943667	0.954667	0.957667	0.955667
1180	0.991333	0.987333	0.974333	0.972333	0.965	0.975	0.980333	0.952	0.947	0.967	0.951	0.942667	0.970333	0.961	0.943667	0.954667	0.957667	0.955667
1181	0.991333	0.987333	0.974333	0.972	0.965	0.975	0.980333	0.952	0.947	0.967	0.950667	0.942667	0.970333	0.961	0.943667	0.954667	0.957667	0.955667
1182	0.991333	0.987333	0.974333	0.972	0.964667	0.975	0.980333	0.952	0.947	0.967	0.950667	0.942667	0.970333	0.961	0.943333	0.954667	0.957667	0.955667
1183	0.991333	0.987333	0.974333	0.972	0.964667	0.975	0.980333	0.952	0.947	0.967	0.950667	0.942333	0.970333	0.961	0.943333	0.954667	0.957667	0.955667
1184	0.991333	0.987333	0.974333	0.972	0.964667	0.975	0.980333	0.952	0.947	0.967	0.950667	0.942333	0.970333	0.961	0.943333	0.954667	0.957667	0.955667
1185	0.991333	0.987333	0.974333	0.972	0.964667	0.975	0.980333	0.952	0.946667	0.967	0.950667	0.942333	0.97	0.961	0.943333	0.954667	0.957667	0.955667
1186	0.991	0.987333	0.974333	0.972	0.964667	0.975	0.980333	0.952	0.946667	0.967	0.950667	0.942333	0.97	0.960667	0.943333	0.954333	0.957667	0.955667
1187	0.991	0.987333	0.974	0.972	0.964667	0.975	0.980333	0.952	0.946667	0.966667	0.950667	0.942333	0.97	0.960667	0.943333	0.954333	0.957333	0.955667
1188	0.991	0.987333	0.974	0.972	0.964667	0.975	0.980333	0.952	0.946667	0.966667	0.950667	0.942333	0.97	0.960667	0.943	0.954333	0.957333	0.955667
1189	0.991	0.987333	0.974	0.972	0.964667	0.975	0.980333	0.951667	0.946667	0.966667	0.950667	0.942333	0.97	0.960667	0.943	0.954333	0.957333	0.955333
1190	0.991	0.987333	0.974	0.972	0.964667	0.975	0.980333	0.951667	0.946667	0.966667	0.950333	0.942333	0.97	0.960667	0.943	0.954333	0.957333	0.955333
1191	0.991	0.987	0.974	0.972	0.964667	0.975	0.980333	0.951667	0.946667	0.966667	0.950333	0.942	0.97	0.960667	0.943	0.954333	0.957333	0.955333
1192	0.991	0.987	0.974	0.971667	0.964667	0.974667	0.980333	0.951667	0.946667	0.966667	0.950333	0.942	0.97	0.960667	0.943	0.954333	0.957333	0.955333
1193	0.991	0.987	0.974	0.971667	0.964667	0.974667	0.980333	0.951667	0.946667	0.966333	0.950333	0.942	0.97	0.960667	0.943	0.954	0.957333	0.955333
1194	0.991	0.987	0.974	0.971667	0.964667	0.974667	0.980333	0.951667	0.946333	0.966333	0.950333	0.942	0.97	0.960333	0.943	0.954	0.957333	0.955333
1195	0.991	0.987	0.974	0.971667	0.964333	0.974667	0.98	0.951667	0.946333	0.966333	0.950333	0.942	0.97	0.960333	0.943	0.954	0.957333	0.955333
1196	0.991	0.987	0.974	0.971667	0.964333	0.974667	0.98	0.951667	0.946333	0.966333	0.950333	0.942	0.969667	0.960333	0.943	0.954	0.957333	0.955333
1197	0.991	0.987	0.974	0.971667	0.964333	0.974667	0.98	0.951333	0.946333	0.966333	0.950333	0.942	0.969667	0.960333	0.943	0.954	0.957333	0.955
1198	0.991	0.987	0.974	0.971667	0.964333	0.974667	0.98	0.951333	0.946333	0.966333	0.95	0.942	0.969667	0.960333	0.942667	0.954	0.957	0.955
1199	0.991	0.987	0.974	0.971667	0.964333	0.974667	0.98	0.951333	0.946333	0.966333	0.95	0.942	0.969667	0.960333	0.942667	0.954	0.957	0.955
1200	0.991	0.987	0.974	0.971667	0.964333	0.974667	0.98	0.951333	0.946333	0.966	0.95	0.942	0.969667	0.960333	0.942667	0.954	0.957	0.955
1201	0.991	0.987	0.974	0.971667	0.964333	0.974667	0.98	0.951333	0.946333	0.966	0.95	0.941667	0.969667	0.96	0.942667	0.953667	0.957	0.955
1202	0.991	0.987	0.974	0.971667	0.964333	0.974667	0.98	0.951333	0.946333	0.966	0.95	0.941667	0.969667	0.96	0.942667	0.953667	0.957	0.955
1203	0.991	0.987	0.974	0.971667	0.964333	0.974667	0.98	0.951333	0.946333	0.966	0.95	0.941667	0.969667	0.96	0.942667	0.953667	0.957	0.955
1204	0.991	0.987	0.974	0.971667	0.964333	0.974667	0.98	0.951333	0.946333	0.966	0.95	0.941667	0.969333	0.96	0.942667	0.953667	0.957	0.954667
1205	0.991	0.987	0.974	0.971333	0.964333	0.974333	0.98	0.951333	0.946333	0.966	0.95	0.941667	0.969333	0.96	0.942667	0.953667	0.957	0.954667
1206	0.991	0.987	0.973667	0.971333	0.964333	0.974333	0.98	0.951	0.946	0.966	0.95	0.941667	0.969333	0.96	0.942667	0.953667	0.957	0.954667
1207	0.991	0.987	0.973667	0.971333	0.964333	0.974333	0.98	0.951	0.946	0.966	0.95	0.941667	0.969333	0.96	0.942333	0.953667	0.957	0.954667
1208	0.991	0.987	0.973667	0.971333	0.964333	0.974333	0.98	0.951	0.946	0.966	0.95	0.941667	0.969333	0.96	0.942333	0.953667	0.957	0.954667
1209	0.991	0.987	0.973667	0.971333	0.964333	0.974333	0.98	0.951	0.946	0.966	0.949667	0.941667	0.969333	0.96	0.942333	0.953667	0.956667	0.954667
1210	0.991	0.987	0.973667	0.971333	0.964333	0.974333	0.979667	0.951	0.946	0.966	0.949667	0.941667	0.969333	0.959667	0.942333	0.953667	0.956667	0.954667
1211	0.990667	0.986667	0.973667	0.971333	0.964333	0.974333	0.979667	0.951	0.946	0.965667	0.949667	0.941667	0.969	0.959667	0.942333	0.953667	0.956667	0.954667
1212	0.990667	0.986667	0.973667	0.971	0.964	0.974333	0.979667	0.951	0.946	0.965667	0.949667	0.941667	0.969	0.959667	0.942333	0.953333	0.956667	0.954667
1213	0.990667	0.986667	0.973667	0.971	0.964	0.974333	0.979667	0.951	0.946	0.965667	0.949667	0.941667	0.969	0.959667	0.942333	0.953333	0.956667	0.954667
1214	0.990667	0.986667	0.973667	0.971	0.964	0.974333	0.979667	0.951	0.946	0.965667	0.949667	0.941667	0.969	0.959667	0.942333	0.953333	0.956667	0.954667
1215	0.990667	0.986667	0.973667	0.971	0.964	0.974333	0.979667	0.951	0.946	0.965667	0.949667	0.941667	0.969	0.959667	0.942333	0.953333	0.956667	0.954333
1216	0.990667	0.986667	0.973667	0.971	0.964	0.974333	0.979667	0.951	0.945667	0.965667	0.949667	0.941333	0.969	0.959667	0.942	0.953333	0.956667	0.954333
1217	0.990667	0.986667	0.973667	0.971	0.964	0.974333	0.979667	0.951	0.945667	0.965667	0.949333	0.941333	0.969	0.959667	0.942	0.953333	0.956667	0.954333
1218	0.990667	0.986667	0.973333	0.971	0.964	0.974333	0.979667	0.951	0.945667	0.965667	0.949333	0.941333	0.968667	0.959667	0.942	0.953333	0.956667	0.954333
1219	0.990667	0.986667	0.973333	0.971	0.964	0.974333	0.979667	0.951	0.945667	0.965667	0.949333	0.941333	0.968667	0.959667	0.942	0.953	0.956333	0.954333
1220	0.990667	0.986667	0.973333	0.971	0.964	0.974333	0.979667	0.951	0.945667	0.965667	0.949333	0.941333	0.968667	0.959333	0.942	0.953	0.956333	0.954333
1221	0.990667	0.986667	0.973333	0.971	0.964	0.974333	0.979667	0.950667	0.945667	0.965667	0.949333	0.941333	0.968667	0.959333	0.942	0.953	0.956333	0.954333
1222	0.990667	0.986667	0.973333	0.970667	0.964	0.974333	0.979667	0.950667	0.945667	0.965667	0.949333	0.941333	0.968667	0.959333	0.942	0.953	0.956333	0.954333
1223	0.990667	0.986667	0.973333	0.970667	0.963667	0.974333	0.979333	0.950667	0.945667	0.965667	0.949333	0.941333	0.968667	0.959333	0.942	0.953	0.956333	0.954333
1224	0.990333	0.986667	0.973333	0.970667	0.963667	0.974333	0.979333	0.950667	0.945333	0.965667	0.949333	0.941333	0.968667	0.959333	0.942	0.953	0.956333	0.954
1225	0.990333	0.986667	0.973333	0.970667	0.963667	0.974333	0.979333	0.950667	0.945333	0.965667	0.949333	0.941333	0.968667	0.959333	0.942	0.952667	0.956333	0.954
1226	0.990333	0.986667	0.973333	0.970667	0.963667	0.974333	0.979333	0.950667	0.945333	0.965667	0.949333	0.941333	0.968667	0.959333	0.942	0.952667	0.956333	0.954
1227	0.990333	0.986667	0.973333	0.970667	0.963667	0.974333	0.979333	0.950667	0.945333	0.965667	0.949333	0.941333	0.968333	0.959333	0.941667	0.952667	0.956	0.954
1228	0.990333	0.986667	0.973333	0.970667	0.963667	0.974333	0.979333	0.950667	0.945333	0.965333	0.949333	0.941333	0.968333	0.959333	0.941667	0.952667	0.956	0.954
1229	0.990333	0.986667	0.973333	0.970667	0.963667	0.974333	0.979333	0.950667	0.945333	0.965333	0.949333	0.941333	0.968333	0.959333	0.941667	0.952667	0.956	0.954
1230	0.990333	0.986667	0.973333	0.970667	0.963667	0.974333	0.979333	0.950667	0.945333	0.965333	0.949333	0.941	0.968333	0.959333	0.941667	0.952667	0.956	0.954
1231	0.990333	0.986667	0.973333	0.970667	0.963667	0.974333	0.979	0.950667	0.945	0.965333	0.949333	0.941	0.968333	0.959	0.941667	0.952333	0.956	0.953667
1232	0.990333	0.986667	0.973333	0.970667	0.963667	0.974	0.979	0.950667	0.945	0.965333	0.949333	0.941	0.968333	0.959	0.941667	0.952333	0.956	0.953667
1233	0.990333	0.986667	0.973333	0.970667	0.963667	0.974	0.979	0.950667	0.945	0.965333	0.949333	0.941	0.968333	0.959	0.941667	0.952333	0.956	0.953667
1234	0.990333	0.986667	0.973333	0.970667	0.963667	0.974	0.979	0.950667	0.945	0.965333	0.949333	0.941	0.968	0.959	0.941667	0.952333	0.956	0.953667
1235	0.990333	0.986667	0.973	0.970333	0.963333	0.974	0.979	0.950333	0.945	0.965333	0.949333	0.941	0.968	0.959	0.941667	0.952333	0.955667	0.953667
1236	0.990333	0.986667	0.973	0.970333	0.963333	0.974	0.979	0.950333	0.945	0.965333	0.949333	0.941	0.968	0.959	0.941667	0.952333	0.955667	0.953667
1237	0.990333	0.986667	0.973	0.970333	0.963333	0.974	0.979	0.950333	0.945	0.965333	0.949	0.941	0.968	0.959	0.941667	0.952333	0.955667	0.953667
1238	0.990333	0.986667	0.973	0.970333	0.963333	0.974	0.979	0.950333	0.945	0.965333	0.949	0.941	0.968	0.959	0.941667	0.952333	0.955667	0.953333
1239	0.990333	0.986667	0.973	0.970333	0.963333	0.974	0.978667	0.950333	0.944667	0.965333	0.949	0.941	0.968	0.959	0.941667	0.952333	0.955667	0.953333
1240	0.990333	0.986333	0.973	0.970333	0.963333	0.974	0.978667	0.950333	0.944667	0.965333	0.949	0.940667	0.968	0.959	0.941333	0.952333	0.955667	0.953333
1241	0.990333	0.986333	0.973	0.970333	0.963333	0.974	0.978667	0.950333	0.944667	0.965333	0.949	0.940667	0.968	0.958667	0.941333	0.952	0.955667	0.953333
1242	0.99	0.986333	0.973	0.970333	0.963333	0.974	0.978667	0.950333	0.944667	0.965333	0.949	0.940667	0.968	0.958667	0.941333	0.952	0.955667	0.953333
1243	0.99	0.986333	0.973	0.970333	0.963333	0.974	0.978667	0.950333	0.944667	0.965333	0.949	0.940667	0.967667	0.958667	0.941333	0.952	0.955333	0.953333
1244	0.99	0.986333	0.973	0.970333	0.963333	0.974	0.978667	0.950333	0.944667	0.965333	0.949	0.940667	0.967667	0.958667	0.941333	0.952	0.955333	0.953333
1245	0.99	0.986333	0.973	0.970333	0.963333	0.973667	0.978667	0.95	0.944667	0.965	0.949	0.940667	0.967667	0.958667	0.941333	0.952	0.955333	0.953
1246	0.99	0.986333	0.973	0.970333	0.963333	0.973667	0.978667	0.95	0.944667	0.965	0.949	0.940667	0.967667	0.958667	0.941333	0.952	0.955333	0.953
1248	0.99	0.986333	0.973	0.97	0.963333	0.973667	0.978667	0.95	0.944667	0.965	0.948667	0.940667	0.967667	0.958667	0.941333	0.952	0.955333	0.953
1249	0.99	0.986333	0.973	0.97	0.963333	0.973667	0.978667	0.95	0.944667	0.965	0.948667	0.940667	0.967667	0.958667	0.941333	0.951667	0.955333	0.953
1250	0.99	0.986333	0.973	0.97	0.963	0.973667	0.978333	0.95	0.944333	0.965	0.948667	0.940667	0.967667	0.958667	0.941	0.951667	0.955333	0.953
1251	0.99	0.986333	0.973	0.97	0.963	0.973667	0.978333	0.95	0.944333	0.965	0.948667	0.940667	0.967667	0.958667	0.941	0.951667	0.955333	0.953
1252	0.99	0.986333	0.973	0.97	0.963	0.973667	0.978333	0.95	0.944333	0.965	0.948667	0.940667	0.967333	0.958667	0.941	0.951667	0.955333	0.953
1253	0.99	0.986333	0.973	0.97	0.963	0.973667	0.978333	0.95	0.944333	0.965	0.948667	0.940667	0.967333	0.958667	0.941	0.951667	0.955	0.953
1254	0.99	0.986333	0.973	0.97	0.963	0.973667	0.978333	0.95	0.944333	0.965	0.948667	0.940667	0.967333	0.958667	0.941	0.951667	0.955	0.952667
1255	0.99	0.986333	0.973	0.97	0.963	0.973667	0.978333	0.95	0.944333	0.965	0.948667	0.940333	0.967333	0.958667	0.941	0.951667	0.955	0.952667
1256	0.99	0.986333	0.973	0.97	0.963	0.973667	0.978333	0.95	0.944333	0.965	0.948667	0.940333	0.967333	0.958667	0.941	0.951333	0.955	0.952667
1257	0.99	0.986333	0.973	0.969667	0.963	0.973667	0.978333	0.95	0.944333	0.965	0.948667	0.940333	0.967333	0.958667	0.941	0.951333	0.955	0.952667
1258	0.99	0.986333	0.973	0.969667	0.963	0.973667	0.978333	0.95	0.944333	0.965	0.948667	0.940333	0.967333	0.958333	0.941	0.951333	0.955	0.952667
1259	0.99	0.986333	0.973	0.969667	0.963	0.973667	0.978333	0.95	0.944	0.965	0.948333	0.940333	0.967333	0.958333	0.941	0.951333	0.955	0.952667
1260	0.99	0.986333	0.973	0.969667	0.963	0.973667	0.978333	0.95	0.944	0.964667	0.948333	0.940333	0.967333	0.958333	0.940667	0.951333	0.955	0.952667
1261	0.99	0.986333	0.973	0.969667	0.962667	0.973667	0.978333	0.95	0.944	0.964667	0.948333	0.940333	0.967333	0.958333	0.940667	0.951333	0.954667	0.952333
1262	0.99	0.986333	0.973	0.969667	0.962667	0.973667	0.978333	0.949667	0.944	0.964667	0.948333	0.940333	0.967	0.958333	0.940667	0.951333	0.954667	0.952333
1263	0.99	0.986333	0.973	0.969667	0.962667	0.973667	0.978333	0.949667	0.944	0.964667	0.948333	0.940333	0.967	0.958333	0.940667	0.951	0.954667	0.952333
1264	0.99	0.986333	0.973	0.969667	0.962667	0.973667	0.978333	0.949667	0.944	0.964667	0.948333	0.940333	0.967	0.958333	0.940667	0.951	0.954667	0.952333
1265	0.99	0.986333	0.973	0.969667	0.962667	0.973667	0.978333	0.949667	0.944	0.964667	0.948333	0.940333	0.967	0.958333	0.940667	0.951	0.954667	0.952333
1266	0.99	0.986333	0.973	0.969667	0.962667	0.973667	0.978333	0.949667	0.944	0.964667	0.948333	0.940333	0.967	0.958333	0.940667	0.951	0.954667	0.952333
1267	0.99	0.986333	0.973	0.969667	0.962333	0.973667	0.978333	0.949667	0.944	0.964667	0.948333	0.94	0.967	0.958333	0.940667	0.951	0.954667	0.952333
1268	0.99	0.986333	0.973	0.969667	0.962333	0.973667	0.978333	0.949667	0.944	0.964667	0.948333	0.94	0.967	0.958333	0.940667	0.951	0.954667	0.952333
1269	0.99	0.986333	0.973	0.969667	0.962333	0.973333	0.978333	0.949667	0.944	0.964667	0.948	0.94	0.967	0.958	0.940667	0.951	0.954667	0.952
1270	0.99	0.986333	0.973	0.969667	0.962333	0.973333	0.978333	0.949667	0.944	0.964333	0.948	0.94	0.967	0.958	0.940667	0.950667	0.954667	0.952
1271	0.99	0.986333	0.973	0.969667	0.962333	0.973333	0.978333	0.949333	0.944	0.964333	0.948	0.94	0.966667	0.958	0.940333	0.950667	0.954333	0.952
1272	0.99	0.986333	0.972667	0.969667	0.962333	0.973333	0.978333	0.949333	0.944	0.964333	0.948	0.94	0.966667	0.958	0.940333	0.950667	0.954333	0.952
1273	0.99	0.986333	0.972667	0.969667	0.962333	0.973333	0.978333	0.949333	0.943667	0.964333	0.948	0.94	0.966667	0.958	0.940333	0.950667	0.954333	0.952
1274	0.99	0.986333	0.972667	0.969667	0.962333	0.973333	0.978333	0.949333	0.943667	0.964333	0.948	0.94	0.966667	0.958	0.940333	0.950667	0.954333	0.952
1275	0.99	0.986	0.972667	0.969667	0.962	0.973333	0.978333	0.949333	0.943667	0.964333	0.948	0.94	0.966667	0.958	0.940333	0.950667	0.954333	0.952
1276	0.989667	0.986	0.972667	0.969333	0.962	0.973333	0.978333	0.949333	0.943667	0.964333	0.948	0.94	0.966667	0.958	0.940333	0.950333	0.954333	0.952
1277	0.989667	0.986	0.972667	0.969333	0.962	0.973333	0.978	0.949333	0.943667	0.964333	0.948	0.94	0.966667	0.958	0.940333	0.950333	0.954333	0.952
1278	0.989667	0.986	0.972667	0.969333	0.962	0.973333	0.978	0.949333	0.943667	0.964333	0.948	0.939667	0.966667	0.958	0.940333	0.950333	0.954333	0.952
1279	0.989667	0.986	0.972667	0.969333	0.962	0.973333	0.978	0.949	0.943667	0.964333	0.948	0.939667	0.966667	0.957667	0.940333	0.950333	0.954333	0.952
1280	0.989667	0.986	0.972667	0.969333	0.962	0.973333	0.978	0.949	0.943667	0.964	0.948	0.939667	0.966667	0.957667	0.940333	0.950333	0.954333	0.952
1281	0.989667	0.986	0.972667	0.969333	0.962	0.973333	0.978	0.949	0.943667	0.964	0.948	0.939667	0.966333	0.957667	0.94	0.950333	0.954	0.951667
1282	0.989667	0.986	0.972667	0.969333	0.962	0.973	0.978	0.949	0.943667	0.964	0.948	0.939667	0.966333	0.957667	0.94	0.950333	0.954	0.951667
1283	0.989667	0.986	0.972667	0.969333	0.962	0.973	0.978	0.949	0.943667	0.964	0.948	0.939667	0.966333	0.957667	0.94	0.950333	0.954	0.951667
1284	0.989667	0.986	0.972667	0.969333	0.962	0.973	0.978	0.949	0.943667	0.964	0.948	0.939667	0.966333	0.957667	0.94	0.95	0.954	0.951667
1285	0.989667	0.986	0.972667	0.969333	0.962	0.973	0.978	0.949	0.943667	0.964	0.948	0.939667	0.966333	0.957667	0.94	0.95	0.954	0.951667
1286	0.989667	0.986	0.972667	0.969333	0.962	0.973	0.978	0.949	0.943667	0.964	0.948	0.939667	0.966333	0.957667	0.94	0.95	0.954	0.951667
1287	0.989667	0.986	0.972667	0.969333	0.962	0.973	0.978	0.949	0.943667	0.964	0.948	0.939667	0.966	0.957667	0.94	0.95	0.954	0.951667
1288	0.989667	0.986	0.972667	0.969	0.962	0.973	0.978	0.949	0.943333	0.964	0.947667	0.939667	0.966	0.957667	0.94	0.95	0.953667	0.951667
1289	0.989667	0.986	0.972333	0.969	0.961667	0.973	0.977667	0.949	0.943333	0.964	0.947667	0.939333	0.966	0.957667	0.94	0.95	0.953667	0.951667
1290	0.989667	0.986	0.972333	0.969	0.961667	0.973	0.977667	0.949	0.943333	0.964	0.947667	0.939333	0.966	0.957667	0.94	0.95	0.953667	0.951667
1291	0.989667	0.986	0.972333	0.969	0.961667	0.973	0.977667	0.949	0.943333	0.963667	0.947667	0.939333	0.966	0.957667	0.939667	0.949667	0.953667	0.951667
1292	0.989667	0.986	0.972333	0.969	0.961667	0.973	0.977667	0.949	0.943333	0.963667	0.947667	0.939333	0.966	0.957667	0.939667	0.949667	0.953667	0.951333
1293	0.989667	0.986	0.972333	0.969	0.961667	0.973	0.977667	0.949	0.943333	0.963667	0.947667	0.939333	0.966	0.957333	0.939667	0.949667	0.953667	0.951333
1294	0.989667	0.986	0.972333	0.969	0.961667	0.973	0.977667	0.949	0.943333	0.963667	0.947667	0.939333	0.965667	0.957333	0.939667	0.949667	0.953667	0.951333
1295	0.989667	0.986	0.972333	0.969	0.961667	0.972667	0.977667	0.949	0.943333	0.963667	0.947667	0.939333	0.965667	0.957333	0.939667	0.949667	0.953667	0.951333
1296	0.989667	0.986	0.972333	0.969	0.961667	0.972667	0.977667	0.949	0.943333	0.963667	0.947667	0.939333	0.965667	0.957333	0.939667	0.949667	0.953333	0.951333
1297	0.989667	0.986	0.972333	0.969	0.961667	0.972667	0.977667	0.949	0.943	0.963667	0.947667	0.939333	0.965667	0.957333	0.939667	0.949667	0.953333	0.951333
1298	0.989667	0.986	0.972333	0.969	0.961333	0.972667	0.977667	0.948667	0.943	0.963667	0.947667	0.939333	0.965667	0.957333	0.939667	0.949667	0.953333	0.951333
1299	0.989667	0.986	0.972333	0.969	0.961333	0.972667	0.977667	0.948667	0.943	0.963667	0.947667	0.939333	0.965667	0.957333	0.939667	0.949667	0.953333	0.951333
1300	0.989667	0.985667	0.972333	0.969	0.961333	0.972667	0.977667	0.948667	0.943	0.963667	0.947667	0.939333	0.965667	0.957333	0.939667	0.949667	0.953333	0.951333
1301	0.989667	0.985667	0.972333	0.969	0.961333	0.972667	0.977667	0.948667	0.943	0.963667	0.947667	0.939	0.965667	0.957333	0.939333	0.949333	0.953333	0.951
1302	0.989667	0.985667	0.972333	0.969	0.961333	0.972667	0.977333	0.948667	0.943	0.963667	0.947667	0.939	0.965667	0.957333	0.939333	0.949333	0.953333	0.951
1303	0.989667	0.985667	0.972333	0.969	0.961333	0.972667	0.977333	0.948667	0.943	0.963667	0.947667	0.939	0.965667	0.957	0.939333	0.949333	0.953333	0.951
1304	0.989333	0.985667	0.972333	0.969	0.961333	0.972667	0.977333	0.948667	0.943	0.963667	0.947667	0.939	0.965333	0.957	0.939333	0.949333	0.953333	0.951
1305	0.989333	0.985667	0.972333	0.969	0.961333	0.972667	0.977333	0.948667	0.943	0.963667	0.947667	0.939	0.965333	0.957	0.939333	0.949333	0.953	0.951
1306	0.989333	0.985667	0.972333	0.968667	0.961333	0.972667	0.977333	0.948667	0.943	0.963333	0.947667	0.939	0.965333	0.957	0.939333	0.949333	0.953	0.951
1307	0.989333	0.985667	0.972333	0.968667	0.961	0.972667	0.977333	0.948667	0.943	0.963333	0.947667	0.939	0.965333	0.957	0.939333	0.949333	0.953	0.951
1308	0.989333	0.985667	0.972333	0.968667	0.961	0.972667	0.977333	0.948667	0.943	0.963333	0.947667	0.939	0.965333	0.957	0.939333	0.949333	0.953	0.951
1309	0.989333	0.985667	0.972	0.968667	0.961	0.972667	0.977333	0.948333	0.943	0.963333	0.947667	0.939	0.965333	0.957	0.939333	0.949333	0.953	0.951
1310	0.989333	0.985667	0.972	0.968667	0.961	0.972667	0.977333	0.948333	0.943	0.963333	0.947667	0.939	0.965333	0.956667	0.939333	0.949333	0.953	0.951
1311	0.989333	0.985667	0.972	0.968667	0.961	0.972667	0.977	0.948333	0.943	0.963333	0.947333	0.939	0.965333	0.956667	0.939333	0.949	0.953	0.951
1312	0.989333	0.985667	0.972	0.968667	0.961	0.972667	0.977	0.948333	0.943	0.963333	0.947333	0.938667	0.965333	0.956667	0.939	0.949	0.953	0.950667
1313	0.989333	0.985667	0.972	0.968667	0.961	0.972333	0.977	0.948333	0.942667	0.963333	0.947333	0.938667	0.965333	0.956667	0.939	0.949	0.953	0.950667
1314	0.989	0.985667	0.972	0.968667	0.961	0.972333	0.977	0.948333	0.942667	0.963333	0.947333	0.938667	0.965333	0.956667	0.939	0.949	0.953	0.950667
1315	0.989	0.985667	0.972	0.968667	0.961	0.972333	0.977	0.948333	0.942667	0.963333	0.947333	0.938667	0.965	0.956667	0.939	0.949	0.952667	0.950667
1317	0.989	0.985667	0.972	0.968667	0.961	0.972333	0.977	0.948333	0.942667	0.963333	0.947333	0.938667	0.965	0.956667	0.939	0.949	0.952667	0.950667
1318	0.989	0.985667	0.972	0.968333	0.961	0.972333	0.977	0.948333	0.942667	0.963333	0.947333	0.938667	0.965	0.956667	0.939	0.949	0.952667	0.950667
1318	0.989	0.985667	0.972	0.968333	0.961	0.972333	0.977	0.948333	0.942667	0.963333	0.947333	0.938667	0.965	0.956667	0.939	0.949	0.952667	0.950667
1320	0.989	0.985667	0.972	0.968333	0.961	0.972333	0.977	0.948333	0.942667	0.963	0.947333	0.938667	0.965	0.956667	0.939	0.948667	0.952667	0.950667
1321	0.989	0.985667	0.972	0.968333	0.961	0.972333	0.977	0.948333	0.942667	0.963	0.947333	0.938667	0.965	0.956333	0.938667	0.948667	0.952667	0.950667
1322	0.989	0.985667	0.971667	0.968333	0.961	0.972333	0.977	0.948333	0.942667	0.963	0.947	0.938667	0.965	0.956333	0.938667	0.948667	0.952333	0.950667
1323	0.989	0.985667	0.971667	0.968333	0.960667	0.972333	0.977	0.948333	0.942667	0.963	0.947	0.938333	0.965	0.956333	0.938667	0.948667	0.952333	0.950667
1324	0.989	0.985667	0.971667	0.968333	0.960667	0.972333	0.977	0.948333	0.942333	0.963	0.947	0.938333	0.964667	0.956333	0.938667	0.948667	0.952333	0.950667
1325	0.989	0.985667	0.971667	0.968333	0.960667	0.972333	0.976667	0.948333	0.942333	0.963	0.947	0.938333	0.964667	0.956333	0.938667	0.948667	0.952333	0.950333
1326	0.989	0.985333	0.971667	0.968333	0.960667	0.972333	0.976667	0.948333	0.942333	0.963	0.947	0.938333	0.964667	0.956333	0.938667	0.948667	0.952333	0.950333
1327	0.989	0.985333	0.971667	0.968333	0.960667	0.972333	0.976667	0.948	0.942333	0.963	0.947	0.938333	0.964667	0.956333	0.938667	0.948667	0.952333	0.950333
1328	0.989	0.985333	0.971667	0.968333	0.960667	0.972333	0.976667	0.948	0.942333	0.963	0.947	0.938333	0.964667	0.956333	0.938667	0.948333	0.952333	0.950333
1329	0.989	0.985333	0.971667	0.968333	0.960667	0.972	0.976667	0.948	0.942333	0.963	0.947	0.938333	0.964667	0.956333	0.938667	0.948333	0.952	0.950333
1330	0.989	0.985333	0.971667	0.968	0.960667	0.972	0.976667	0.948	0.942333	0.963	0.947	0.938333	0.964333	0.956333	0.938667	0.948333	0.952	0.950333
1331	0.989	0.985333	0.971667	0.968	0.960667	0.972	0.976667	0.948	0.942333	0.962667	0.947	0.938333	0.964333	0.956333	0.938667	0.948333	0.952	0.950333
1332	0.989	0.985333	0.971333	0.968	0.960667	0.972	0.976667	0.948	0.942333	0.962667	0.947	0.938333	0.964333	0.956333	0.938667	0.948333	0.952	0.950333
1333	0.989	0.985333	0.971333	0.968	0.960667	0.972	0.976667	0.948	0.942333	0.962667	0.947	0.938333	0.964333	0.956333	0.938667	0.948333	0.952	0.950333
1334	0.989	0.985333	0.971333	0.968	0.960667	0.972	0.976667	0.948	0.942333	0.962667	0.946667	0.938	0.964333	0.956333	0.938333	0.948333	0.952	0.95
1335	0.988667	0.985333	0.971333	0.968	0.960333	0.972	0.976667	0.948	0.942	0.962667	0.946667	0.938	0.964333	0.956333	0.938333	0.948333	0.952	0.95
1336	0.988667	0.985333	0.971333	0.968	0.960333	0.972	0.976667	0.948	0.942	0.962667	0.946667	0.938	0.964333	0.956	0.938333	0.948333	0.952	0.95
1337	0.988667	0.985333	0.971333	0.968	0.960333	0.972	0.976667	0.948	0.942	0.962667	0.946667	0.938	0.964333	0.956	0.938333	0.948333	0.952	0.95
1338	0.988667	0.985333	0.971333	0.968	0.960333	0.972	0.976667	0.947667	0.942	0.962667	0.946667	0.938	0.964333	0.956	0.938333	0.948	0.952	0.95
1339	0.988667	0.985333	0.971333	0.968	0.960333	0.972	0.976667	0.947667	0.942	0.962667	0.946667	0.938	0.964333	0.956	0.938333	0.948	0.952	0.95
1340	0.988667	0.985333	0.971333	0.968	0.960333	0.972	0.976667	0.947667	0.942	0.962667	0.946667	0.938	0.964	0.956	0.938333	0.948	0.951667	0.95
1341	0.988667	0.985333	0.971333	0.967667	0.960333	0.972	0.976667	0.947667	0.942	0.962667	0.946667	0.938	0.964	0.956	0.938333	0.948	0.951667	0.95
1342	0.988667	0.985333	0.971333	0.967667	0.960333	0.972	0.976333	0.947667	0.942	0.962667	0.946667	0.938	0.964	0.956	0.938333	0.948	0.951667	0.95
1343	0.988667	0.985333	0.971333	0.967667	0.960333	0.972	0.976333	0.947667	0.942	0.962667	0.946667	0.938	0.964	0.956	0.938333	0.948	0.951667	0.95
1344	0.988667	0.985333	0.971333	0.967667	0.960333	0.972	0.976333	0.947667	0.942	0.962333	0.946667	0.938	0.964	0.956	0.938333	0.948	0.951667	0.95
1345	0.988333	0.985333	0.971333	0.967667	0.960333	0.972	0.976333	0.947667	0.942	0.962333	0.946667	0.938	0.964	0.956	0.938333	0.947667	0.951667	0.95
1346	0.988333	0.985333	0.971333	0.967667	0.960333	0.972	0.976333	0.947667	0.942	0.962333	0.946667	0.937667	0.964	0.956	0.938333	0.947667	0.951667	0.95
1347	0.988333	0.985333	0.971333	0.967667	0.960333	0.972	0.976333	0.947667	0.942	0.962333	0.946333	0.937667	0.964	0.956	0.938	0.947667	0.951667	0.949667
1348	0.988333	0.985333	0.971	0.967667	0.960333	0.971667	0.976333	0.947667	0.941667	0.962333	0.946333	0.937667	0.964	0.956	0.938	0.947667	0.951667	0.949667
1349	0.988333	0.985333	0.971	0.967667	0.96	0.971667	0.976333	0.947667	0.941667	0.962333	0.946333	0.937667	0.964	0.955667	0.938	0.947667	0.951667	0.949667
1350	0.988333	0.985333	0.971	0.967667	0.96	0.971667	0.976333	0.947667	0.941667	0.962333	0.946333	0.937667	0.964	0.955667	0.938	0.947667	0.951667	0.949667
1351	0.988333	0.985333	0.971	0.967667	0.96	0.971667	0.976333	0.947667	0.941667	0.962333	0.946333	0.937667	0.964	0.955667	0.938	0.947667	0.951333	0.949667
1352	0.988333	0.985	0.971	0.967667	0.96	0.971667	0.976333	0.947333	0.941667	0.962333	0.946333	0.937667	0.963667	0.955667	0.938	0.947667	0.951333	0.949667
1353	0.988333	0.985	0.971	0.967333	0.96	0.971667	0.976333	0.947333	0.941667	0.962333	0.946333	0.937667	0.963667	0.955667	0.938	0.947667	0.951333	0.949667
1354	0.988333	0.985	0.971	0.967333	0.96	0.971667	0.976333	0.947333	0.941667	0.962333	0.946333	0.937667	0.963667	0.955667	0.938	0.947333	0.951333	0.949667
1355	0.988333	0.985	0.971	0.967333	0.96	0.971667	0.976333	0.947333	0.941667	0.962333	0.946333	0.937667	0.963667	0.955667	0.938	0.947333	0.951333	0.949667
1356	0.988333	0.985	0.971	0.967333	0.96	0.971667	0.976	0.947333	0.941667	0.962	0.946333	0.937667	0.963667	0.955667	0.938	0.947333	0.951333	0.949667
1357	0.988333	0.985	0.971	0.967333	0.959667	0.971667	0.976	0.947333	0.941667	0.962	0.946333	0.937667	0.963667	0.955667	0.937667	0.947333	0.951333	0.949667
1358	0.988333	0.985	0.971	0.967333	0.959667	0.971667	0.976	0.947333	0.941667	0.962	0.946	0.937667	0.963667	0.955333	0.937667	0.947333	0.951333	0.949667
1359	0.988333	0.985	0.971	0.967333	0.959667	0.971667	0.976	0.947333	0.941667	0.962	0.946	0.937667	0.963667	0.955333	0.937667	0.947333	0.951333	0.949667
1360	0.988333	0.985	0.971	0.967333	0.959667	0.971667	0.976	0.947333	0.941667	0.962	0.946	0.937667	0.963333	0.955333	0.937667	0.947	0.951333	0.949667
1361	0.988333	0.985	0.971	0.967333	0.959667	0.971667	0.976	0.947333	0.941667	0.962	0.946	0.937667	0.963333	0.955333	0.937667	0.947	0.951333	0.949667
1362	0.988333	0.985	0.971	0.967333	0.959667	0.971667	0.976	0.947333	0.941667	0.962	0.946	0.937667	0.963333	0.955333	0.937667	0.947	0.951333	0.949667
1363	0.988333	0.985	0.971	0.967333	0.959667	0.971667	0.976	0.947333	0.941667	0.962	0.946	0.937667	0.963333	0.955333	0.937667	0.947	0.951333	0.949333
1364	0.988333	0.985	0.971	0.967333	0.959667	0.971667	0.976	0.947333	0.941667	0.962	0.946	0.937667	0.963333	0.955333	0.937667	0.947	0.951	0.949333
1365	0.988333	0.985	0.971	0.967333	0.959667	0.971667	0.976	0.947333	0.941667	0.962	0.946	0.937333	0.963333	0.955333	0.937667	0.947	0.951	0.949333
1366	0.988333	0.985	0.971	0.967333	0.959667	0.971667	0.976	0.947333	0.941667	0.962	0.946	0.937333	0.963333	0.955333	0.937667	0.947	0.951	0.949333
1367	0.988333	0.985	0.971	0.967333	0.959667	0.971667	0.976	0.947333	0.941667	0.962	0.946	0.937333	0.963	0.955333	0.937667	0.946667	0.951	0.949333
1368	0.988333	0.985	0.971	0.967333	0.959333	0.971667	0.976	0.947333	0.941667	0.962	0.946	0.937333	0.963	0.955333	0.937333	0.946667	0.951	0.949333
1369	0.988333	0.984667	0.971	0.967333	0.959333	0.971667	0.975667	0.947333	0.941667	0.962	0.946	0.937333	0.963	0.955	0.937333	0.946667	0.951	0.949333
1370	0.988333	0.984667	0.971	0.967333	0.959333	0.971667	0.975667	0.947333	0.941667	0.962	0.946	0.937333	0.963	0.955	0.937333	0.946667	0.951	0.949333
1371	0.988333	0.984667	0.971	0.967333	0.959333	0.971667	0.975667	0.947333	0.941333	0.962	0.946	0.937333	0.963	0.955	0.937333	0.946667	0.951	0.949
1372	0.988333	0.984667	0.971	0.967	0.959333	0.971667	0.975667	0.947333	0.941333	0.962	0.946	0.937333	0.963	0.955	0.937333	0.946667	0.951	0.949
1373	0.988333	0.984667	0.971	0.967	0.959333	0.971667	0.975667	0.947333	0.941333	0.962	0.946	0.937333	0.963	0.955	0.937333	0.946667	0.951	0.949
1374	0.988333	0.984667	0.971	0.967	0.959333	0.971667	0.975667	0.947333	0.941333	0.962	0.946	0.937333	0.963	0.955	0.937333	0.946667	0.951	0.949
1375	0.988333	0.984667	0.971	0.967	0.959333	0.971667	0.975667	0.947333	0.941333	0.961667	0.945667	0.937333	0.963	0.955	0.937333	0.946667	0.950667	0.949
1376	0.988333	0.984667	0.971	0.967	0.959333	0.971333	0.975667	0.947333	0.941333	0.961667	0.945667	0.937333	0.962667	0.955	0.937333	0.946333	0.950667	0.949
1377	0.988333	0.984667	0.971	0.967	0.959333	0.971333	0.975667	0.947	0.941333	0.961667	0.945667	0.937333	0.962667	0.955	0.937333	0.946333	0.950667	0.949
1378	0.988333	0.984667	0.971	0.967	0.959	0.971333	0.975667	0.947	0.941333	0.961667	0.945667	0.937333	0.962667	0.955	0.937333	0.946333	0.950667	0.949
1379	0.988333	0.984667	0.971	0.967	0.959	0.971333	0.975667	0.947	0.941333	0.961667	0.945667	0.937	0.962667	0.955	0.937	0.946333	0.950667	0.949
1380	0.988333	0.984667	0.971	0.967	0.959	0.971333	0.975667	0.947	0.941333	0.961667	0.945667	0.937	0.962667	0.955	0.937	0.946333	0.950667	0.948667
1381	0.988333	0.984667	0.971	0.967	0.959	0.971333	0.975667	0.947	0.941333	0.961667	0.945667	0.937	0.962667	0.955	0.937	0.946333	0.950667	0.948667
1382	0.988	0.984667	0.971	0.967	0.959	0.971333	0.975333	0.947	0.941333	0.961667	0.945667	0.937	0.962667	0.954667	0.937	0.946333	0.950667	0.948667
1383	0.988	0.984667	0.971	0.967	0.959	0.971333	0.975333	0.947	0.941333	0.961667	0.945667	0.937	0.962667	0.954667	0.937	0.946333	0.950333	0.948667
1384	0.988	0.984333	0.971	0.967	0.959	0.971333	0.975333	0.947	0.941333	0.961667	0.945667	0.937	0.962333	0.954667	0.937	0.946	0.950333	0.948667
1385	0.988	0.984333	0.971	0.967	0.959	0.971333	0.975333	0.947	0.941	0.961667	0.945667	0.937	0.962333	0.954667	0.937	0.946	0.950333	0.948667
1387	0.988	0.984333	0.971	0.966667	0.958667	0.971333	0.975333	0.946667	0.941	0.961333	0.945667	0.937	0.962333	0.954667	0.937	0.946	0.950333	0.948667
1388	0.988	0.984333	0.971	0.966667	0.958667	0.971333	0.975333	0.946667	0.941	0.961333	0.945333	0.937	0.962333	0.954667	0.937	0.946	0.950333	0.948667
1389	0.988	0.984333	0.971	0.966667	0.958667	0.971333	0.975333	0.946667	0.941	0.961333	0.945333	0.937	0.962333	0.954667	0.936667	0.946	0.950333	0.948667
1390	0.988	0.984333	0.971	0.966667	0.958667	0.971333	0.975333	0.946667	0.941	0.961333	0.945333	0.937	0.962333	0.954667	0.936667	0.946	0.950333	0.948667
1391	0.988	0.984333	0.971	0.966667	0.958667	0.971333	0.975333	0.946667	0.941	0.961333	0.945333	0.937	0.962333	0.954667	0.936667	0.946	0.950333	0.948333
1392	0.988	0.984333	0.970667	0.966667	0.958667	0.971333	0.975333	0.946667	0.941	0.961333	0.945333	0.937	0.962333	0.954333	0.936667	0.946	0.950333	0.948333
1393	0.988	0.984333	0.970667	0.966667	0.958667	0.971333	0.975333	0.946667	0.941	0.961333	0.945333	0.937	0.962	0.954333	0.936667	0.945667	0.950333	0.948333
1394	0.988	0.984333	0.970667	0.966667	0.958667	0.971333	0.975333	0.946667	0.941	0.961333	0.945333	0.937	0.962	0.954333	0.936667	0.945667	0.950333	0.948333
1395	0.988	0.984333	0.970667	0.966667	0.958667	0.971333	0.975333	0.946667	0.941	0.961333	0.945333	0.936667	0.962	0.954333	0.936667	0.945667	0.950333	0.948333
1396	0.988	0.984333	0.970667	0.966667	0.958667	0.971333	0.975	0.946667	0.941	0.961333	0.945333	0.936667	0.962	0.954333	0.936333	0.945667	0.950333	0.948333
1397	0.988	0.984333	0.970667	0.966667	0.958667	0.971333	0.975	0.946667	0.941	0.961	0.945333	0.936667	0.962	0.954333	0.936333	0.945667	0.950333	0.948333
1398	0.988	0.984333	0.970667	0.966667	0.958667	0.971333	0.975	0.946667	0.940667	0.961	0.945333	0.936667	0.962	0.954333	0.936333	0.945667	0.950333	0.948333
1399	0.988	0.984333	0.970667	0.966667	0.958667	0.971	0.975	0.946667	0.940667	0.961	0.945333	0.936667	0.962	0.954333	0.936333	0.945667	0.950333	0.948333
1400	0.988	0.984333	0.970667	0.966667	0.958667	0.971	0.975	0.946333	0.940667	0.961	0.945333	0.936667	0.962	0.954333	0.936333	0.945667	0.95	0.948333
1401	0.988	0.984333	0.970667	0.966333	0.958333	0.971	0.975	0.946333	0.940667	0.961	0.945333	0.936667	0.961667	0.954333	0.936333	0.945333	0.95	0.948333
1402	0.988	0.984333	0.970667	0.966333	0.958333	0.971	0.975	0.946333	0.940667	0.961	0.945333	0.936667	0.961667	0.954333	0.936333	0.945333	0.95	0.948
1403	0.988	0.984333	0.970667	0.966333	0.958333	0.971	0.975	0.946333	0.940667	0.961	0.945333	0.936667	0.961667	0.954333	0.936333	0.945333	0.95	0.948
1404	0.988	0.984333	0.970667	0.966333	0.958333	0.971	0.975	0.946333	0.940667	0.961	0.945333	0.936667	0.961667	0.954333	0.936333	0.945333	0.95	0.948
1405	0.988	0.984333	0.970333	0.966333	0.958333	0.971	0.975	0.946333	0.940667	0.961	0.945	0.936667	0.961667	0.954333	0.936333	0.945333	0.95	0.948
1406	0.988	0.984333	0.970333	0.966333	0.958333	0.971	0.975	0.946333	0.940667	0.960667	0.945	0.936667	0.961667	0.954333	0.936333	0.945333	0.95	0.948
1407	0.988	0.984333	0.970333	0.966333	0.958333	0.971	0.975	0.946333	0.940667	0.960667	0.945	0.936667	0.961667	0.954	0.936333	0.945333	0.95	0.948
1408	0.988	0.984333	0.970333	0.966333	0.958333	0.971	0.975	0.946333	0.940667	0.960667	0.945	0.936667	0.961667	0.954	0.936333	0.945333	0.949667	0.948
1409	0.988	0.984	0.970333	0.966333	0.958333	0.971	0.975	0.946	0.940667	0.960667	0.945	0.936333	0.961667	0.954	0.936333	0.945333	0.949667	0.948
1410	0.987667	0.984	0.970333	0.966333	0.958333	0.970667	0.975	0.946	0.940333	0.960667	0.945	0.936333	0.961667	0.954	0.936	0.945333	0.949667	0.948
1411	0.987667	0.984	0.970333	0.966333	0.958333	0.970667	0.974667	0.946	0.940333	0.960333	0.945	0.936333	0.961667	0.954	0.936	0.945333	0.949667	0.947667
1412	0.987667	0.984	0.970333	0.966333	0.958333	0.970667	0.974667	0.946	0.940333	0.960333	0.945	0.936333	0.961667	0.954	0.936	0.945333	0.949667	0.947667
1413	0.987667	0.984	0.970333	0.966333	0.958333	0.970667	0.974667	0.946	0.940333	0.960333	0.945	0.936333	0.961667	0.954	0.936	0.945	0.949667	0.947667
1414	0.987667	0.984	0.970333	0.966333	0.958333	0.970667	0.974667	0.946	0.940333	0.960333	0.945	0.936333	0.961667	0.954	0.936	0.945	0.949667	0.947667
1415	0.987667	0.984	0.970333	0.966333	0.958333	0.970667	0.974667	0.946	0.940333	0.960333	0.945	0.936333	0.961333	0.954	0.936	0.945	0.949667	0.947667
1416	0.987667	0.984	0.970333	0.966	0.958333	0.970667	0.974667	0.946	0.940333	0.960333	0.945	0.936333	0.961333	0.954	0.936	0.945	0.949667	0.947667
1417	0.987667	0.984	0.970333	0.966	0.958333	0.970667	0.974667	0.946	0.940333	0.960333	0.945	0.936333	0.961333	0.953667	0.936	0.945	0.949667	0.947667
1418	0.987667	0.984	0.970333	0.966	0.958333	0.970667	0.974667	0.946	0.940333	0.960333	0.944667	0.936333	0.961333	0.953667	0.936	0.945	0.949333	0.947667
1419	0.987667	0.984	0.970333	0.966	0.958	0.970667	0.974667	0.946	0.940333	0.960333	0.944667	0.936333	0.961333	0.953667	0.936	0.945	0.949333	0.947667
1420	0.987667	0.984	0.970333	0.966	0.958	0.970667	0.974667	0.946	0.940333	0.960333	0.944667	0.936333	0.961333	0.953667	0.936	0.945	0.949333	0.947667
1421	0.987667	0.984	0.970333	0.966	0.958	0.970667	0.974667	0.946	0.940333	0.960333	0.944667	0.936333	0.961333	0.953667	0.936	0.944667	0.949333	0.947667
1422	0.987667	0.984	0.970333	0.966	0.958	0.970667	0.974333	0.946	0.940333	0.960333	0.944667	0.936	0.961333	0.953667	0.936	0.944667	0.949333	0.947333
1423	0.987667	0.984	0.970333	0.966	0.958	0.970667	0.974333	0.946	0.940333	0.960333	0.944667	0.936	0.961333	0.953667	0.935667	0.944667	0.949333	0.947333
1424	0.987667	0.984	0.970333	0.966	0.958	0.970667	0.974333	0.945667	0.940333	0.960333	0.944667	0.936	0.961	0.953333	0.935667	0.944667	0.949333	0.947333
1425	0.987667	0.984	0.970333	0.966	0.958	0.970333	0.974333	0.945667	0.940333	0.960333	0.944667	0.936	0.961	0.953333	0.935667	0.944667	0.949333	0.947333
1426	0.987667	0.984	0.970333	0.966	0.958	0.970333	0.974333	0.945667	0.940333	0.960333	0.944667	0.936	0.961	0.953333	0.935667	0.944667	0.949333	0.947333
1427	0.987667	0.984	0.970333	0.966	0.958	0.970333	0.974333	0.945667	0.940333	0.960333	0.944333	0.936	0.961	0.953333	0.935667	0.944667	0.949333	0.947333
1428	0.987667	0.984	0.970333	0.966	0.958	0.970333	0.974333	0.945667	0.940333	0.960333	0.944333	0.936	0.961	0.953333	0.935667	0.944667	0.949333	0.947333
1429	0.987667	0.984	0.970333	0.966	0.957667	0.970333	0.974333	0.945667	0.940333	0.960333	0.944333	0.936	0.961	0.953333	0.935667	0.944667	0.949	0.947333
1430	0.987667	0.984	0.970333	0.966	0.957667	0.970333	0.974333	0.945667	0.940333	0.960333	0.944333	0.936	0.961	0.953333	0.935667	0.944667	0.949	0.947333
1431	0.987667	0.984	0.970333	0.966	0.957667	0.970333	0.974333	0.945667	0.940333	0.960333	0.944333	0.936	0.961	0.953333	0.935667	0.944667	0.949	0.947333
1432	0.987333	0.984	0.970333	0.966	0.957667	0.970333	0.974333	0.945667	0.940333	0.960333	0.944333	0.936	0.961	0.953333	0.935667	0.944667	0.949	0.947
1433	0.987333	0.984	0.970333	0.966	0.957667	0.970333	0.974333	0.945667	0.940333	0.960333	0.944333	0.936	0.961	0.953333	0.935667	0.944667	0.949	0.947
1434	0.987333	0.984	0.970333	0.966	0.957667	0.970333	0.974333	0.945667	0.940333	0.960333	0.944333	0.936	0.960667	0.953333	0.935667	0.944667	0.949	0.947
1435	0.987333	0.984	0.970333	0.966	0.957667	0.970333	0.974333	0.945667	0.94	0.960333	0.944333	0.936	0.960667	0.953333	0.935667	0.944333	0.949	0.947
1436	0.987333	0.984	0.97	0.966	0.957667	0.970333	0.974333	0.945667	0.94	0.96	0.944333	0.936	0.960667	0.953	0.935667	0.944333	0.949	0.947
1437	0.987333	0.984	0.97	0.966	0.957667	0.970333	0.974	0.945333	0.94	0.96	0.944333	0.936	0.960667	0.953	0.935333	0.944333	0.948667	0.947
1438	0.987333	0.984	0.97	0.966	0.957667	0.970333	0.974	0.945333	0.94	0.96	0.944333	0.936	0.960667	0.953	0.935333	0.944333	0.948667	0.947
1439	0.987333	0.983667	0.97	0.966	0.957667	0.970333	0.974	0.945333	0.94	0.96	0.944333	0.935667	0.960667	0.953	0.935333	0.944333	0.948667	0.947
1440	0.987333	0.983667	0.97	0.966	0.957667	0.970333	0.974	0.945333	0.94	0.96	0.944333	0.935667	0.960667	0.953	0.935333	0.944333	0.948667	0.947
1441	0.987333	0.983667	0.97	0.966	0.957667	0.970333	0.974	0.945333	0.94	0.96	0.944333	0.935667	0.960667	0.953	0.935333	0.944333	0.948667	0.947
1442	0.987333	0.983667	0.97	0.966	0.957667	0.970333	0.974	0.945333	0.94	0.96	0.944	0.935667	0.960667	0.953	0.935333	0.944333	0.948667	0.947
1443	0.987333	0.983667	0.97	0.966	0.957667	0.970333	0.974	0.945333	0.94	0.96	0.944	0.935667	0.960667	0.953	0.935333	0.944333	0.948667	0.947
1444	0.987333	0.983667	0.97	0.966	0.957333	0.970333	0.974	0.945333	0.94	0.96	0.944	0.935667	0.960667	0.953	0.935333	0.944	0.948667	0.947
1445	0.987333	0.983667	0.97	0.966	0.957333	0.970333	0.974	0.945333	0.939667	0.96	0.944	0.935667	0.960333	0.953	0.935333	0.944	0.948667	0.947
1446	0.987333	0.983667	0.97	0.965667	0.957333	0.970333	0.974	0.945333	0.939667	0.959667	0.944	0.935667	0.960333	0.953	0.935333	0.944	0.948667	0.946667
1447	0.987333	0.983667	0.97	0.965667	0.957333	0.970333	0.974	0.945333	0.939667	0.959667	0.944	0.935667	0.960333	0.953	0.935	0.944	0.948333	0.946667
1448	0.987333	0.983667	0.97	0.965667	0.957333	0.970333	0.974	0.945333	0.939667	0.959667	0.944	0.935667	0.960333	0.953	0.935	0.944	0.948333	0.946667
1449	0.987333	0.983667	0.97	0.965667	0.957333	0.970333	0.974	0.945	0.939667	0.959667	0.944	0.935667	0.960333	0.953	0.935	0.944	0.948333	0.946667
1451	0.987333	0.983667	0.969667	0.965667	0.957333	0.970333	0.973667	0.945	0.939667	0.959667	0.944	0.935667	0.960333	0.952667	0.935	0.944	0.948333	0.946667
1451	0.987333	0.983667	0.969667	0.965667	0.957333	0.970333	0.973667	0.945	0.939667	0.959667	0.944	0.935333	0.960333	0.952667	0.935	0.944	0.948333	0.946667
1452	0.987333	0.983667	0.969667	0.965667	0.957333	0.970333	0.973667	0.945	0.939667	0.959667	0.944	0.935333	0.960333	0.952667	0.935	0.943667	0.948333	0.946667
1453	0.987333	0.983667	0.969667	0.965667	0.957333	0.970333	0.973667	0.945	0.939667	0.959667	0.944	0.935333	0.960333	0.952667	0.935	0.943667	0.948333	0.946667
1454	0.987333	0.983667	0.969667	0.965667	0.957333	0.970333	0.973667	0.945	0.939667	0.959667	0.944	0.935333	0.960333	0.952667	0.935	0.943667	0.948333	0.946667
1456	0.987333	0.983667	0.969667	0.965667	0.957333	0.970333	0.973667	0.945	0.939667	0.959667	0.944	0.935333	0.96	0.952667	0.935	0.943667	0.948333	0.946667
1457	0.987333	0.983667	0.969667	0.965667	0.957333	0.970333	0.973667	0.945	0.939333	0.959667	0.944	0.935333	0.96	0.952667	0.935	0.943667	0.948333	0.946667
1458	0.987333	0.983667	0.969667	0.965667	0.957333	0.970333	0.973667	0.945	0.939333	0.959667	0.944	0.935333	0.96	0.952667	0.935	0.943667	0.948333	0.946333
1459	0.987333	0.983667	0.969667	0.965667	0.957	0.970333	0.973667	0.945	0.939333	0.959667	0.944	0.935333	0.96	0.952667	0.935	0.943667	0.948333	0.946333
1460	0.987333	0.983667	0.969667	0.965667	0.957	0.97	0.973333	0.945	0.939333	0.959667	0.944	0.935333	0.96	0.952667	0.935	0.943333	0.948	0.946333
1461	0.987	0.983667	0.969667	0.965667	0.957	0.97	0.973333	0.945	0.939333	0.959667	0.944	0.935333	0.96	0.952667	0.935	0.943333	0.948	0.946333
1462	0.987	0.983667	0.969333	0.965667	0.957	0.97	0.973333	0.945	0.939333	0.959333	0.943667	0.935333	0.96	0.952667	0.935	0.943333	0.948	0.946333
1463	0.987	0.983667	0.969333	0.965667	0.957	0.97	0.973333	0.945	0.939333	0.959333	0.943667	0.935333	0.959667	0.952667	0.934667	0.943333	0.948	0.946333
1464	0.987	0.983667	0.969333	0.965333	0.957	0.97	0.973333	0.945	0.939333	0.959333	0.943667	0.935333	0.959667	0.952667	0.934667	0.943333	0.948	0.946333
1465	0.987	0.983667	0.969333	0.965333	0.957	0.97	0.973333	0.945	0.939333	0.959333	0.943667	0.935333	0.959667	0.952667	0.934667	0.943333	0.948	0.946333
1466	0.987	0.983667	0.969333	0.965333	0.957	0.97	0.973333	0.945	0.939333	0.959333	0.943667	0.935	0.959667	0.952667	0.934667	0.943333	0.948	0.946333
1467	0.987	0.983667	0.969333	0.965333	0.957	0.97	0.973333	0.945	0.939333	0.959333	0.943667	0.935	0.959667	0.952667	0.934667	0.943333	0.948	0.946333
1468	0.987	0.983667	0.969333	0.965333	0.957	0.97	0.973333	0.945	0.939	0.959333	0.943667	0.935	0.959667	0.952667	0.934667	0.943333	0.948	0.946
1469	0.987	0.983667	0.969333	0.965333	0.957	0.97	0.973333	0.945	0.939	0.959333	0.943667	0.935	0.959667	0.952333	0.934667	0.943	0.948	0.946
1470	0.987	0.983667	0.969333	0.965333	0.957	0.97	0.973333	0.945	0.939	0.959333	0.943667	0.935	0.959667	0.952333	0.934667	0.943	0.947667	0.946
1471	0.987	0.983667	0.969333	0.965333	0.957	0.97	0.973333	0.944667	0.939	0.959333	0.943667	0.935	0.959667	0.952333	0.934667	0.943	0.947667	0.946
1472	0.987	0.983667	0.969333	0.965333	0.957	0.97	0.973333	0.944667	0.939	0.959333	0.943667	0.935	0.959667	0.952333	0.934667	0.943	0.947667	0.946
1473	0.987	0.983667	0.969333	0.965333	0.957	0.969667	0.973333	0.944667	0.939	0.959	0.943333	0.935	0.959667	0.952333	0.934667	0.943	0.947667	0.946
1474	0.987	0.983667	0.969333	0.965333	0.956667	0.969667	0.973333	0.944667	0.939	0.959	0.943333	0.935	0.959667	0.952333	0.934667	0.943	0.947667	0.946
1475	0.987	0.983333	0.969333	0.965333	0.956667	0.969667	0.973333	0.944667	0.939	0.959	0.943333	0.935	0.959667	0.952333	0.934667	0.943	0.947667	0.946
1476	0.987	0.983333	0.969333	0.965333	0.956667	0.969667	0.973	0.944667	0.939	0.959	0.943333	0.935	0.959667	0.952333	0.934333	0.943	0.947667	0.946
1477	0.987	0.983333	0.969333	0.965333	0.956667	0.969667	0.973	0.944667	0.939	0.959	0.943333	0.935	0.959667	0.952333	0.934333	0.943	0.947333	0.946
1478	0.987	0.983333	0.969333	0.965333	0.956667	0.969667	0.973	0.944667	0.939	0.959	0.943333	0.935	0.959667	0.952333	0.934333	0.943	0.947333	0.946
1479	0.987	0.983333	0.969333	0.965333	0.956667	0.969667	0.973	0.944667	0.939	0.959	0.943333	0.935	0.959333	0.952333	0.934333	0.943	0.947333	0.945667
1480	0.987	0.983333	0.969333	0.965333	0.956667	0.969667	0.973	0.944333	0.939	0.959	0.943333	0.935	0.959333	0.952333	0.934333	0.942667	0.947333	0.945667
1481	0.987	0.983333	0.969333	0.965333	0.956667	0.969667	0.973	0.944333	0.939	0.959	0.943333	0.935	0.959333	0.952	0.934333	0.942667	0.947333	0.945667
1482	0.987	0.983333	0.969333	0.965333	0.956667	0.969667	0.973	0.944333	0.938667	0.959	0.943333	0.935	0.959333	0.952	0.934333	0.942667	0.947333	0.945667
1483	0.987	0.983333	0.969333	0.965	0.956667	0.969667	0.973	0.944333	0.938667	0.958667	0.943333	0.934667	0.959333	0.952	0.934333	0.942667	0.947333	0.945667
1484	0.987	0.983333	0.969333	0.965	0.956667	0.969333	0.973	0.944333	0.938667	0.958667	0.943333	0.934667	0.959333	0.952	0.934333	0.942667	0.947	0.945667
1485	0.987	0.983333	0.969333	0.965	0.956667	0.969333	0.973	0.944333	0.938667	0.958667	0.943333	0.934667	0.959333	0.952	0.934333	0.942667	0.947	0.945667
1486	0.986667	0.983333	0.969333	0.965	0.956333	0.969333	0.973	0.944333	0.938667	0.958667	0.943333	0.934667	0.959333	0.952	0.934333	0.942667	0.947	0.945667
1487	0.986667	0.983333	0.969333	0.965	0.956333	0.969333	0.973	0.944333	0.938667	0.958667	0.943	0.934667	0.959333	0.952	0.934333	0.942333	0.947	0.945667
1488	0.986667	0.983333	0.969333	0.965	0.956333	0.969333	0.973	0.944333	0.938667	0.958667	0.943	0.934667	0.959333	0.952	0.934333	0.942333	0.947	0.945667
1489	0.986667	0.983333	0.969333	0.965	0.956333	0.969333	0.973	0.944333	0.938667	0.958667	0.943	0.934667	0.959333	0.952	0.934333	0.942333	0.947	0.945667
1490	0.986667	0.983333	0.969	0.965	0.956333	0.969333	0.973	0.944333	0.938667	0.958667	0.943	0.934667	0.959	0.952	0.934333	0.942333	0.947	0.945333
1491	0.986667	0.983333	0.969	0.965	0.956333	0.969333	0.972667	0.944333	0.938667	0.958667	0.943	0.934667	0.959	0.951667	0.934	0.942333	0.947	0.945333
1492	0.986667	0.983	0.969	0.965	0.956333	0.969333	0.972667	0.944333	0.938667	0.958667	0.943	0.934667	0.959	0.951667	0.934	0.942333	0.947	0.945333
1493	0.986667	0.983	0.969	0.965	0.956333	0.969333	0.972667	0.944333	0.938667	0.958667	0.943	0.934667	0.959	0.951667	0.934	0.942333	0.947	0.945333
1494	0.986667	0.983	0.969	0.965	0.956333	0.969333	0.972667	0.944333	0.938667	0.958667	0.943	0.934667	0.959	0.951667	0.934	0.942	0.946667	0.945333
1495	0.986667	0.983	0.969	0.965	0.956333	0.969333	0.972667	0.944333	0.938333	0.958333	0.943	0.934667	0.959	0.951667	0.934	0.942	0.946667	0.945333
1496	0.986667	0.983	0.969	0.965	0.956333	0.969333	0.972667	0.944333	0.938333	0.958333	0.943	0.934667	0.959	0.951667	0.934	0.942	0.946667	0.945333
1497	0.986667	0.983	0.969	0.964667	0.956333	0.969333	0.972667	0.944333	0.938333	0.958333	0.943	0.934667	0.959	0.951667	0.934	0.942	0.946667	0.945333
1498	0.986667	0.983	0.969	0.964667	0.956	0.969333	0.972667	0.944333	0.938333	0.958333	0.943	0.934667	0.958667	0.951667	0.934	0.942	0.946667	0.945333
1499	0.986667	0.983	0.969	0.964667	0.956	0.969333	0.972667	0.944333	0.938333	0.958333	0.943	0.934667	0.958667	0.951333	0.934	0.942	0.946667	0.945333
1500	0.986667	0.983	0.969	0.964667	0.956	0.969333	0.972667	0.944333	0.938333	0.958333	0.943	0.934667	0.958667	0.951333	0.934	0.942	0.946667	0.945333
1501	0.986667	0.983	0.969	0.964667	0.956	0.969333	0.972667	0.944333	0.938333	0.958333	0.943	0.934667	0.958667	0.951333	0.934	0.942	0.946667	0.945333
1502	0.986667	0.983	0.969	0.964667	0.956	0.969333	0.972333	0.944	0.938333	0.958333	0.943	0.934667	0.958667	0.951333	0.934	0.942	0.946667	0.945333
1503	0.986667	0.983	0.969	0.964667	0.956	0.969333	0.972333	0.944	0.938333	0.958333	0.943	0.934667	0.958667	0.951333	0.934	0.942	0.946333	0.945
1504	0.986667	0.983	0.969	0.964667	0.956	0.969	0.972333	0.944	0.938333	0.958333	0.942667	0.934667	0.958667	0.951333	0.934	0.941667	0.946333	0.945
1505	0.986667	0.983	0.969	0.964667	0.956	0.969	0.972333	0.944	0.938333	0.958	0.942667	0.934667	0.958667	0.951333	0.934	0.941667	0.946333	0.945
1506	0.986667	0.983	0.969	0.964667	0.956	0.969	0.972333	0.944	0.938	0.958	0.942667	0.934667	0.958667	0.951333	0.933667	0.941667	0.946333	0.945
1507	0.986667	0.983	0.969	0.964667	0.956	0.969	0.972333	0.944	0.938	0.958	0.942667	0.934667	0.958667	0.951333	0.933667	0.941667	0.946333	0.945
1508	0.986667	0.983	0.969	0.964667	0.956	0.969	0.972333	0.944	0.938	0.958	0.942667	0.934667	0.958667	0.951333	0.933667	0.941667	0.946333	0.945
1509	0.986667	0.983	0.969	0.964667	0.956	0.969	0.972333	0.944	0.938	0.958	0.942667	0.934667	0.958333	0.951333	0.933667	0.941667	0.946333	0.945
1510	0.986667	0.983	0.969	0.964667	0.956	0.969	0.972333	0.944	0.938	0.958	0.942667	0.934667	0.958333	0.951	0.933667	0.941667	0.946	0.945
1511	0.986667	0.983	0.968667	0.964667	0.956	0.969	0.972333	0.944	0.938	0.958	0.942667	0.934667	0.958333	0.951	0.933667	0.941667	0.946	0.945
1512	0.986667	0.983	0.968667	0.964667	0.956	0.969	0.972333	0.944	0.938	0.958	0.942667	0.934667	0.958333	0.951	0.933667	0.941667	0.946	0.945
1513	0.986667	0.983	0.968667	0.964667	0.956	0.969	0.972333	0.944	0.938	0.958	0.942667	0.934667	0.958333	0.951	0.933667	0.941667	0.946	0.945
1514	0.986667	0.983	0.968667	0.964333	0.956	0.969	0.972333	0.944	0.938	0.958	0.942667	0.934333	0.958333	0.951	0.933667	0.941333	0.946	0.945
1515	0.986667	0.983	0.968667	0.964333	0.956	0.969	0.972333	0.944	0.938	0.958	0.942667	0.934333	0.958333	0.951	0.933667	0.941333	0.946	0.944667
1516	0.986667	0.983	0.968667	0.964333	0.956	0.969	0.972333	0.944	0.938	0.958	0.942667	0.934333	0.958333	0.951	0.933667	0.941333	0.946	0.944667
1517	0.986667	0.983	0.968667	0.964333	0.956	0.969	0.972333	0.944	0.938	0.958	0.942667	0.934333	0.958333	0.951	0.933667	0.941333	0.946	0.944667
1518	0.986667	0.983	0.968667	0.964333	0.955667	0.969	0.972333	0.944	0.937667	0.958	0.942667	0.934333	0.958333	0.951	0.933667	0.941333	0.946	0.944667
1519	0.986667	0.983	0.968667	0.964333	0.955667	0.969	0.972333	0.944	0.937667	0.958	0.942667	0.934333	0.958333	0.951	0.933667	0.941333	0.946	0.944667
1520	0.986667	0.983	0.968667	0.964333	0.955667	0.969	0.972333	0.944	0.937667	0.958	0.942667	0.934333	0.958333	0.951	0.933667	0.941333	0.946	0.944667
1522	0.986667	0.983	0.968667	0.964333	0.955667	0.969	0.972333	0.944	0.937667	0.958	0.942333	0.934333	0.958	0.951	0.933667	0.941333	0.945667	0.944667
1523	0.986667	0.983	0.968667	0.964333	0.955667	0.969	0.972333	0.944	0.937667	0.958	0.942333	0.934333	0.958	0.951	0.933333	0.941333	0.945667	0.944667
1524	0.986667	0.983	0.968667	0.964333	0.955667	0.969	0.972333	0.944	0.937667	0.957667	0.942333	0.934333	0.958	0.951	0.933333	0.941333	0.945667	0.944667
1525	0.986667	0.983	0.968667	0.964333	0.955667	0.969	0.972	0.944	0.937667	0.957667	0.942333	0.934333	0.958	0.951	0.933333	0.941333	0.945667	0.944667
1526	0.986667	0.983	0.968667	0.964333	0.955667	0.969	0.972	0.943667	0.937667	0.957667	0.942333	0.934333	0.958	0.950667	0.933333	0.941333	0.945667	0.944667
1527	0.986667	0.983	0.968667	0.964333	0.955667	0.969	0.972	0.943667	0.937667	0.957667	0.942333	0.934333	0.958	0.950667	0.933333	0.941	0.945667	0.944667
1528	0.986667	0.983	0.968667	0.964333	0.955667	0.969	0.972	0.943667	0.937667	0.957667	0.942333	0.934333	0.958	0.950667	0.933333	0.941	0.945667	0.944667
1529	0.986667	0.983	0.968667	0.964333	0.955667	0.969	0.972	0.943667	0.937667	0.957667	0.942333	0.934333	0.958	0.950667	0.933333	0.941	0.945667	0.944667
1530	0.986667	0.983	0.968667	0.964333	0.955667	0.969	0.972	0.943667	0.937667	0.957667	0.942333	0.934333	0.958	0.950667	0.933333	0.941	0.945667	0.944667
1531	0.986667	0.982667	0.968667	0.964	0.955667	0.968667	0.972	0.943667	0.937667	0.957667	0.942333	0.934	0.958	0.950667	0.933333	0.941	0.945333	0.944333
1532	0.986667	0.982667	0.968667	0.964	0.955667	0.968667	0.972	0.943667	0.937667	0.957667	0.942333	0.934	0.957667	0.950667	0.933333	0.941	0.945333	0.944333
1533	0.986667	0.982667	0.968667	0.964	0.955667	0.968667	0.972	0.943667	0.937667	0.957667	0.942333	0.934	0.957667	0.950667	0.933333	0.941	0.945333	0.944333
1534	0.986333	0.982667	0.968667	0.964	0.955667	0.968667	0.972	0.943667	0.937667	0.957667	0.942333	0.934	0.957667	0.950667	0.933	0.940667	0.945333	0.944333
1535	0.986333	0.982667	0.968667	0.964	0.955667	0.968667	0.972	0.943333	0.937667	0.957667	0.942	0.934	0.957667	0.950667	0.933	0.940667	0.945333	0.944333
1536	0.986333	0.982667	0.968667	0.964	0.955333	0.968667	0.972	0.943333	0.937667	0.957667	0.942	0.934	0.957667	0.950333	0.933	0.940667	0.945333	0.944333
1537	0.986333	0.982667	0.968333	0.964	0.955333	0.968667	0.972	0.943333	0.937333	0.957667	0.942	0.934	0.957667	0.950333	0.933	0.940667	0.945333	0.944333
1538	0.986333	0.982667	0.968333	0.964	0.955333	0.968667	0.971667	0.943333	0.937333	0.957667	0.942	0.934	0.957667	0.950333	0.933	0.940667	0.945333	0.944333
1539	0.986333	0.982667	0.968333	0.964	0.955333	0.968667	0.971667	0.943333	0.937333	0.957667	0.942	0.934	0.957667	0.950333	0.933	0.940667	0.945333	0.944333
1540	0.986333	0.982667	0.968333	0.964	0.955333	0.968667	0.971667	0.943333	0.937333	0.957667	0.942	0.934	0.957667	0.950333	0.933	0.940667	0.945333	0.944333
1541	0.986333	0.982667	0.968333	0.964	0.955333	0.968667	0.971667	0.943333	0.937333	0.957667	0.942	0.934	0.957667	0.950333	0.933	0.940667	0.945	0.944
1542	0.986333	0.982667	0.968333	0.964	0.955333	0.968667	0.971667	0.943333	0.937333	0.957333	0.942	0.934	0.957667	0.950333	0.933	0.940667	0.945	0.944
1543	0.986333	0.982667	0.968333	0.964	0.955333	0.968667	0.971667	0.943333	0.937333	0.957333	0.942	0.934	0.957667	0.950333	0.933	0.940333	0.945	0.944
1544	0.986333	0.982667	0.968333	0.964	0.955333	0.968333	0.971667	0.943333	0.937333	0.957333	0.942	0.933667	0.957667	0.950333	0.933	0.940333	0.945	0.944
1545	0.986333	0.982667	0.968333	0.964	0.955333	0.968333	0.971667	0.943333	0.937333	0.957333	0.942	0.933667	0.957667	0.95	0.933	0.940333	0.945	0.944
1546	0.986333	0.982667	0.968333	0.964	0.955333	0.968333	0.971667	0.943333	0.937333	0.957333	0.942	0.933667	0.957333	0.95	0.933	0.940333	0.945	0.944
1547	0.986333	0.982667	0.968333	0.964	0.955333	0.968333	0.971667	0.943333	0.937333	0.957333	0.942	0.933667	0.957333	0.95	0.933	0.940333	0.945	0.944
1548	0.986333	0.982667	0.968333	0.964	0.955333	0.968333	0.971667	0.943333	0.937333	0.957333	0.942	0.933667	0.957333	0.95	0.933	0.940333	0.945	0.944
1549	0.986333	0.982667	0.968333	0.964	0.955333	0.968333	0.971667	0.943333	0.937333	0.957333	0.941667	0.933667	0.957333	0.95	0.933	0.940333	0.945	0.944
1550	0.986333	0.982667	0.968333	0.964	0.955333	0.968333	0.971667	0.943	0.937333	0.957333	0.941667	0.933667	0.957333	0.95	0.933	0.940333	0.945	0.944
1551	0.986333	0.982333	0.968333	0.964	0.955333	0.968333	0.971667	0.943	0.937333	0.957333	0.941667	0.933667	0.957333	0.95	0.933	0.940333	0.945	0.944
1552	0.986333	0.982333	0.968333	0.964	0.955333	0.968333	0.971667	0.943	0.937	0.957333	0.941667	0.933667	0.957333	0.95	0.932667	0.94	0.944667	0.944
1553	0.986333	0.982333	0.968333	0.964	0.955	0.968333	0.971667	0.943	0.937	0.957	0.941667	0.933667	0.957333	0.95	0.932667	0.94	0.944667	0.944
1554	0.986333	0.982333	0.968333	0.963667	0.955	0.968333	0.971333	0.943	0.937	0.957	0.941667	0.933667	0.957333	0.95	0.932667	0.94	0.944667	0.943667
1555	0.986333	0.982333	0.968333	0.963667	0.955	0.968333	0.971333	0.943	0.937	0.957	0.941667	0.933667	0.957333	0.95	0.932667	0.94	0.944667	0.943667
1556	0.986333	0.982333	0.968333	0.963667	0.955	0.968	0.971333	0.943	0.937	0.957	0.941667	0.933667	0.957333	0.95	0.932667	0.94	0.944667	0.943667
1557	0.986333	0.982333	0.968333	0.963667	0.955	0.968	0.971333	0.943	0.937	0.957	0.941667	0.933333	0.957333	0.95	0.932667	0.94	0.944667	0.943667
1558	0.986333	0.982333	0.968333	0.963667	0.955	0.968	0.971333	0.943	0.937	0.957	0.941667	0.933333	0.957	0.95	0.932667	0.94	0.944667	0.943667
1559	0.986333	0.982333	0.968333	0.963667	0.955	0.968	0.971333	0.943	0.937	0.957	0.941667	0.933333	0.957	0.95	0.932667	0.94	0.944667	0.943667
1560	0.986333	0.982333	0.968	0.963667	0.955	0.968	0.971333	0.943	0.937	0.957	0.941667	0.933333	0.957	0.95	0.932333	0.939667	0.944667	0.943667
1561	0.986333	0.982333	0.968	0.963667	0.955	0.968	0.971333	0.943	0.937	0.957	0.941667	0.933333	0.957	0.95	0.932333	0.939667	0.944667	0.943667
1562	0.986333	0.982	0.968	0.963667	0.955	0.968	0.971333	0.943	0.937	0.957	0.941667	0.933333	0.957	0.949667	0.932333	0.939667	0.944667	0.943667
1563	0.986	0.982	0.968	0.963667	0.955	0.968	0.971333	0.942667	0.936667	0.957	0.941667	0.933333	0.957	0.949667	0.932333	0.939667	0.944333	0.943667
1564	0.986	0.982	0.968	0.963667	0.955	0.968	0.971333	0.942667	0.936667	0.957	0.941333	0.933333	0.957	0.949667	0.932333	0.939667	0.944333	0.943667
1565	0.986	0.982	0.968	0.963667	0.955	0.968	0.971333	0.942667	0.936667	0.957	0.941333	0.933333	0.957	0.949667	0.932333	0.939667	0.944333	0.943667
1566	0.986	0.982	0.968	0.963667	0.955	0.968	0.971333	0.942667	0.936667	0.957	0.941333	0.933333	0.957	0.949667	0.932333	0.939667	0.944333	0.943667
1567	0.986	0.982	0.968	0.963667	0.955	0.968	0.971	0.942667	0.936667	0.957	0.941333	0.933333	0.957	0.949667	0.932333	0.939333	0.944333	0.943667
1568	0.986	0.982	0.968	0.963667	0.955	0.968	0.971	0.942667	0.936667	0.956667	0.941333	0.933333	0.956667	0.949667	0.932333	0.939333	0.944333	0.943667
1569	0.986	0.982	0.968	0.963333	0.955	0.968	0.971	0.942667	0.936667	0.956667	0.941333	0.933333	0.956667	0.949667	0.932	0.939333	0.944333	0.943333
1570	0.986	0.982	0.968	0.963333	0.955	0.968	0.971	0.942667	0.936667	0.956667	0.941333	0.933333	0.956667	0.949667	0.932	0.939333	0.944333	0.943333
1571	0.986	0.982	0.968	0.963333	0.955	0.968	0.971	0.942667	0.936667	0.956667	0.941333	0.933333	0.956667	0.949667	0.932	0.939333	0.944333	0.943333
1572	0.986	0.982	0.968	0.963333	0.955	0.968	0.971	0.942667	0.936333	0.956667	0.941333	0.933333	0.956667	0.949667	0.932	0.939333	0.944333	0.943333
1573	0.986	0.982	0.967667	0.963333	0.955	0.968	0.971	0.942667	0.936333	0.956667	0.941333	0.933333	0.956667	0.949667	0.932	0.939333	0.944333	0.943333
1574	0.986	0.982	0.967667	0.963333	0.955	0.968	0.971	0.942667	0.936333	0.956667	0.941333	0.933333	0.956667	0.949667	0.932	0.939	0.944333	0.943333
1575	0.986	0.982	0.967667	0.963333	0.955	0.968	0.971	0.942667	0.936333	0.956667	0.941333	0.933333	0.956667	0.949667	0.932	0.939	0.944333	0.943333
1576	0.986	0.982	0.967667	0.963333	0.954667	0.968	0.971	0.942333	0.936333	0.956333	0.941333	0.933333	0.956667	0.949667	0.932	0.939	0.944333	0.943333
1577	0.986	0.982	0.967667	0.963333	0.954667	0.968	0.971	0.942333	0.936333	0.956333	0.941333	0.933333	0.956667	0.949667	0.932	0.939	0.944333	0.943333
1578	0.986	0.982	0.967667	0.963333	0.954667	0.968	0.971	0.942333	0.936333	0.956333	0.941333	0.933	0.956667	0.949667	0.932	0.939	0.944333	0.943333
1579	0.986	0.982	0.967667	0.963333	0.954667	0.968	0.971	0.942333	0.936333	0.956333	0.941333	0.933	0.956667	0.949667	0.932	0.939	0.944333	0.943333
1580	0.985667	0.982	0.967667	0.963333	0.954667	0.968	0.971	0.942333	0.936333	0.956333	0.941333	0.933	0.956333	0.949667	0.932	0.939	0.944333	0.943
1581	0.985667	0.982	0.967667	0.963333	0.954667	0.968	0.971	0.942333	0.936333	0.956333	0.941333	0.933	0.956333	0.949333	0.932	0.939	0.944333	0.943
1582	0.985667	0.982	0.967667	0.963333	0.954667	0.968	0.971	0.942333	0.936333	0.956333	0.941333	0.933	0.956333	0.949333	0.932	0.939	0.944	0.943
1583	0.985667	0.982	0.967667	0.963	0.954667	0.968	0.971	0.942333	0.936333	0.956333	0.941	0.933	0.956333	0.949333	0.932	0.938667	0.944	0.943
1585	0.985667	0.982	0.967667	0.963	0.954667	0.968	0.971	0.942333	0.936333	0.956333	0.941	0.933	0.956333	0.949333	0.932	0.938667	0.944	0.943
1586	0.985667	0.982	0.967667	0.963	0.954667	0.967667	0.971	0.942333	0.936	0.956333	0.941	0.933	0.956333	0.949333	0.932	0.938667	0.944	0.943
1587	0.985667	0.982	0.967667	0.963	0.954667	0.967667	0.971	0.942333	0.936	0.956333	0.941	0.933	0.956333	0.949333	0.931667	0.938667	0.944	0.943
1588	0.985667	0.982	0.967667	0.963	0.954667	0.967667	0.971	0.942333	0.936	0.956333	0.941	0.933	0.956333	0.949333	0.931667	0.938667	0.944	0.943
1589	0.985667	0.982	0.967667	0.963	0.954667	0.967667	0.971	0.942333	0.936	0.956333	0.941	0.933	0.956333	0.949333	0.931667	0.938667	0.944	0.943
1590	0.985667	0.982	0.967667	0.963	0.954667	0.967667	0.970667	0.942333	0.936	0.956333	0.941	0.932667	0.956	0.949333	0.931667	0.938667	0.944	0.943
1591	0.985667	0.982	0.967667	0.963	0.954667	0.967667	0.970667	0.942333	0.936	0.956333	0.941	0.932667	0.956	0.949333	0.931667	0.938667	0.944	0.943
1592	0.985667	0.982	0.967667	0.963	0.954667	0.967667	0.970667	0.942333	0.936	0.956333	0.941	0.932667	0.956	0.949333	0.931667	0.938667	0.944	0.942667
1593	0.985667	0.982	0.967333	0.963	0.954667	0.967667	0.970667	0.942333	0.936	0.956333	0.941	0.932667	0.956	0.949333	0.931667	0.938667	0.944	0.942667
1594	0.985667	0.981667	0.967333	0.963	0.954667	0.967667	0.970667	0.942333	0.936	0.956333	0.941	0.932667	0.956	0.949333	0.931667	0.938667	0.943667	0.942667
1595	0.985667	0.981667	0.967333	0.963	0.954667	0.967667	0.970667	0.942333	0.936	0.956333	0.941	0.932667	0.956	0.949333	0.931667	0.938667	0.943667	0.942667
1596	0.985667	0.981667	0.967333	0.963	0.954667	0.967667	0.970667	0.942333	0.936	0.956333	0.941	0.932667	0.956	0.949333	0.931667	0.938667	0.943667	0.942667
1597	0.985667	0.981667	0.967333	0.963	0.954333	0.967667	0.970667	0.942333	0.936	0.956	0.940667	0.932667	0.956	0.949	0.931667	0.938667	0.943667	0.942667
1598	0.985667	0.981667	0.967333	0.963	0.954333	0.967667	0.970667	0.942333	0.936	0.956	0.940667	0.932667	0.955667	0.949	0.931667	0.938333	0.943667	0.942667
1599	0.985667	0.981667	0.967333	0.963	0.954333	0.967667	0.970667	0.942333	0.936	0.956	0.940667	0.932667	0.955667	0.949	0.931333	0.938333	0.943667	0.942667
1600	0.985667	0.981667	0.967333	0.963	0.954333	0.967667	0.970667	0.942333	0.936	0.956	0.940667	0.932667	0.955667	0.949	0.931333	0.938333	0.943667	0.942667
1601	0.985667	0.981667	0.967333	0.963	0.954333	0.967667	0.970667	0.942	0.936	0.956	0.940667	0.932667	0.955667	0.949	0.931333	0.938333	0.943667	0.942667
1602	0.985667	0.981667	0.967333	0.963	0.954333	0.967667	0.970333	0.942	0.935667	0.956	0.940667	0.932667	0.955667	0.949	0.931333	0.938333	0.943667	0.942667
1603	0.985667	0.981667	0.967333	0.963	0.954333	0.967667	0.970333	0.942	0.935667	0.956	0.940667	0.932667	0.955667	0.949	0.931333	0.938333	0.943333	0.942667
1604	0.985667	0.981667	0.967333	0.962667	0.954333	0.967667	0.970333	0.942	0.935667	0.956	0.940667	0.932667	0.955667	0.949	0.931333	0.938333	0.943333	0.942333
1605	0.985667	0.981667	0.967333	0.963	0.954	0.967667	0.970333	0.942	0.935667	0.956	0.940667	0.932333	0.955667	0.949	0.931333	0.938333	0.943333	0.942333
1606	0.985667	0.981667	0.967333	0.962667	0.954	0.967667	0.970333	0.942	0.935667	0.956	0.940667	0.932333	0.955667	0.949	0.931333	0.938333	0.943333	0.942333
1607	0.985667	0.981667	0.967333	0.962667	0.954	0.967667	0.970333	0.942	0.935667	0.956	0.940667	0.932333	0.955667	0.949	0.931333	0.938	0.943333	0.942333
1608	0.985667	0.981667	0.967333	0.962667	0.954	0.967667	0.970333	0.941667	0.935667	0.956	0.940667	0.932333	0.955667	0.949	0.931333	0.938	0.943333	0.942333
1609	0.985667	0.981667	0.967333	0.962667	0.954	0.967667	0.970333	0.941667	0.935667	0.955667	0.940667	0.932333	0.955667	0.949	0.931333	0.938	0.943333	0.942333
1610	0.985667	0.981667	0.967333	0.962667	0.954	0.967667	0.970333	0.941667	0.935667	0.955667	0.940667	0.932333	0.955667	0.949	0.931333	0.938	0.943333	0.942333
1611	0.985667	0.981667	0.967333	0.962667	0.954	0.967667	0.970333	0.941667	0.935667	0.955667	0.940333	0.932333	0.955667	0.949	0.931333	0.938	0.943333	0.942333
1612	0.985667	0.981667	0.967333	0.962667	0.954	0.967667	0.970333	0.941667	0.935667	0.955667	0.940333	0.932333	0.955333	0.949	0.931	0.938	0.943333	0.942333
1613	0.985667	0.981667	0.967333	0.962667	0.954	0.967667	0.970333	0.941667	0.935667	0.955667	0.940333	0.932333	0.955333	0.949	0.931	0.938	0.943333	0.942333
1614	0.985667	0.981667	0.967333	0.962667	0.953667	0.967667	0.970333	0.941667	0.935667	0.955667	0.940333	0.932333	0.955333	0.949	0.931	0.938	0.943333	0.942333
1615	0.985667	0.981667	0.967	0.962667	0.953667	0.967667	0.970333	0.941667	0.935667	0.955667	0.940333	0.932333	0.955333	0.949	0.931	0.938	0.943333	0.942
1616	0.985667	0.981667	0.967	0.962667	0.953667	0.967667	0.970333	0.941667	0.935667	0.955667	0.940333	0.932333	0.955333	0.949	0.931	0.937667	0.943	0.942
1617	0.985667	0.981667	0.967	0.962667	0.953667	0.967667	0.970333	0.941667	0.935667	0.955667	0.940333	0.932333	0.955333	0.949	0.931	0.937667	0.943	0.942
1618	0.985667	0.981667	0.967	0.962667	0.953667	0.967667	0.970333	0.941667	0.935667	0.955667	0.940333	0.932333	0.955333	0.949	0.931	0.937667	0.943	0.942
1620	0.985667	0.981667	0.967	0.962667	0.953667	0.967667	0.970333	0.941667	0.935667	0.955667	0.940333	0.932333	0.955333	0.949	0.931	0.937667	0.943	0.942
1620	0.985333	0.981667	0.967	0.962667	0.953667	0.967333	0.970333	0.941667	0.935667	0.955667	0.940333	0.932333	0.955333	0.948667	0.931	0.937667	0.943	0.942
1621	0.985333	0.981667	0.967	0.962333	0.953667	0.967333	0.97	0.941667	0.935667	0.955667	0.940333	0.932333	0.955	0.948667	0.931	0.937667	0.943	0.942
1622	0.985333	0.981333	0.967	0.962333	0.953667	0.967333	0.97	0.941667	0.935667	0.955333	0.940333	0.932333	0.955	0.948667	0.931	0.937667	0.943	0.942
1623	0.985333	0.981333	0.967	0.962333	0.953667	0.967333	0.97	0.941667	0.935667	0.955333	0.940333	0.932333	0.955	0.948667	0.931	0.937667	0.943	0.942
1624	0.985333	0.981333	0.967	0.962333	0.953667	0.967333	0.97	0.941667	0.935667	0.955333	0.940333	0.932333	0.955	0.948667	0.931	0.937333	0.943	0.942
1625	0.985333	0.981333	0.967	0.962333	0.953667	0.967333	0.97	0.941667	0.935667	0.955333	0.940333	0.932333	0.955	0.948667	0.931	0.937333	0.943	0.941667
1627	0.985333	0.981333	0.967	0.962333	0.953667	0.967333	0.97	0.941667	0.935667	0.955333	0.940333	0.932333	0.955	0.948667	0.931	0.937333	0.943	0.941667
1627	0.985333	0.981333	0.967	0.962333	0.953667	0.967333	0.97	0.941333	0.935667	0.955333	0.94	0.932	0.955	0.948667	0.931	0.937333	0.942667	0.941667
1628	0.985333	0.981333	0.967	0.962333	0.953667	0.967333	0.97	0.941333	0.935667	0.955333	0.94	0.932	0.955	0.948667	0.931	0.937333	0.942667	0.941667
1629	0.985333	0.981333	0.967	0.962333	0.953667	0.967333	0.97	0.941333	0.935333	0.955333	0.94	0.932	0.955	0.948667	0.931	0.937333	0.942667	0.941667
1630	0.985333	0.981333	0.967	0.962333	0.953667	0.967333	0.97	0.941333	0.935333	0.955333	0.94	0.932	0.955	0.948667	0.930667	0.937333	0.942667	0.941667
1631	0.985333	0.981333	0.967	0.962333	0.953667	0.967333	0.97	0.941333	0.935333	0.955333	0.94	0.932	0.954667	0.948667	0.930667	0.937	0.942667	0.941667
1632	0.985333	0.981333	0.967	0.962333	0.953667	0.967333	0.97	0.941333	0.935333	0.955333	0.94	0.932	0.954667	0.948667	0.930667	0.937	0.942667	0.941667
1634	0.985333	0.981333	0.967	0.962	0.953667	0.967333	0.97	0.941333	0.935333	0.955333	0.94	0.932	0.954667	0.948333	0.930667	0.937	0.942667	0.941667
1634	0.985333	0.981333	0.967	0.962	0.953667	0.967333	0.97	0.941333	0.935333	0.955333	0.94	0.932	0.954667	0.948333	0.930667	0.937	0.942667	0.941667
1635	0.985333	0.981333	0.967	0.962	0.953667	0.967333	0.969667	0.941333	0.935333	0.955	0.94	0.932	0.954667	0.948333	0.930667	0.937	0.942667	0.941667
1636	0.985333	0.981333	0.967	0.962	0.953667	0.967333	0.969667	0.941333	0.935333	0.955	0.94	0.932	0.954667	0.948333	0.930667	0.937	0.942667	0.941667
1637	0.985333	0.981333	0.967	0.962	0.953667	0.967333	0.969667	0.941333	0.935333	0.955	0.94	0.932	0.954667	0.948333	0.930667	0.937	0.942667	0.941333
1638	0.985333	0.981333	0.967	0.962	0.953667	0.967333	0.969667	0.941333	0.935333	0.955	0.94	0.932	0.954667	0.948333	0.930667	0.936667	0.942667	0.941333
1639	0.985333	0.981333	0.967	0.962	0.953667	0.967333	0.969667	0.941333	0.935333	0.955	0.94	0.932	0.954667	0.948333	0.930667	0.936667	0.942667	0.941333
1641	0.985333	0.981333	0.967	0.962	0.953333	0.967333	0.969667	0.941333	0.935333	0.955	0.94	0.932	0.954667	0.948333	0.930333	0.936667	0.942667	0.941333
1641	0.985333	0.981333	0.967	0.962	0.953333	0.967	0.969667	0.941333	0.935333	0.955	0.94	0.931667	0.954667	0.948333	0.930333	0.936667	0.942667	0.941333
1642	0.985333	0.981333	0.967	0.962	0.953333	0.967	0.969667	0.941333	0.935333	0.955	0.939667	0.931667	0.954667	0.948333	0.930333	0.936667	0.942667	0.941333
1643	0.985333	0.981333	0.967	0.962	0.953333	0.967	0.969667	0.941333	0.935	0.955	0.939667	0.931667	0.954333	0.948333	0.930333	0.936667	0.942333	0.941333
1644	0.985333	0.981333	0.967	0.962	0.953333	0.967	0.969667	0.941333	0.935	0.955	0.939667	0.931667	0.954333	0.948	0.930333	0.936667	0.942333	0.941333
1646	0.985333	0.981333	0.967	0.962	0.953333	0.967	0.969333	0.941333	0.935	0.955	0.939667	0.931667	0.954333	0.948	0.930333	0.936667	0.942333	0.941333
1647	0.985333	0.981333	0.967	0.962	0.953333	0.967	0.969333	0.941333	0.935	0.955	0.939667	0.931667	0.954333	0.948	0.930333	0.936333	0.942333	0.941333
1648	0.985333	0.981333	0.967	0.962	0.953333	0.967	0.969333	0.941333	0.935	0.955	0.939667	0.931667	0.954333	0.948	0.930333	0.936333	0.942333	0.941333
1649	0.985333	0.981333	0.967	0.962	0.953333	0.967	0.969333	0.941333	0.935	0.954667	0.939667	0.931667	0.954333	0.948	0.930333	0.936333	0.942333	0.941333
1650	0.985333	0.981333	0.967	0.961667	0.953333	0.967	0.969333	0.941333	0.935	0.954667	0.939667	0.931667	0.954333	0.948	0.930333	0.936333	0.942333	0.941
1651	0.985333	0.981333	0.967	0.961667	0.953333	0.967	0.969333	0.941	0.935	0.954667	0.939667	0.931667	0.954333	0.948	0.930333	0.936333	0.942333	0.941
1652	0.985333	0.981333	0.967	0.961667	0.953333	0.966667	0.969333	0.941	0.935	0.954667	0.939667	0.931667	0.954333	0.948	0.930333	0.936333	0.942333	0.941
1653	0.985333	0.981333	0.967	0.961667	0.953333	0.966667	0.969333	0.941	0.935	0.954667	0.939667	0.931667	0.954333	0.948	0.930333	0.936333	0.942333	0.941
1654	0.985333	0.981333	0.967	0.961667	0.953333	0.966667	0.969333	0.941	0.935	0.954667	0.939667	0.931667	0.954333	0.948	0.930333	0.936	0.942	0.941
1655	0.985333	0.981333	0.967	0.961667	0.953333	0.966667	0.969333	0.941	0.935	0.954667	0.939667	0.931667	0.954	0.948	0.930333	0.936	0.942	0.941
1656	0.985333	0.981333	0.967	0.961667	0.953333	0.966667	0.969333	0.941	0.935	0.954667	0.939667	0.931667	0.954	0.948	0.930333	0.936	0.942	0.941
1657	0.985333	0.981333	0.967	0.961667	0.953333	0.966667	0.969333	0.941	0.935	0.954667	0.939333	0.931667	0.954	0.948	0.930333	0.936	0.942	0.941
1658	0.985333	0.981333	0.967	0.961667	0.953333	0.966667	0.969333	0.941	0.935	0.954667	0.939333	0.931667	0.954	0.948	0.93	0.936	0.942	0.941
1659	0.985333	0.981333	0.967	0.961667	0.953333	0.966667	0.969333	0.941	0.935	0.954667	0.939333	0.931667	0.954	0.948	0.93	0.936	0.942	0.941
1660	0.985333	0.981333	0.967	0.961667	0.953333	0.966667	0.969333	0.941	0.935	0.954667	0.939333	0.931667	0.954	0.948	0.93	0.936	0.942	0.941
1661	0.985333	0.981333	0.967	0.961667	0.953333	0.966667	0.969333	0.941	0.935	0.954667	0.939333	0.931667	0.954	0.948	0.93	0.936	0.941667	0.941
1662	0.985333	0.981333	0.967	0.961667	0.953333	0.966667	0.969333	0.941	0.935	0.954667	0.939333	0.931667	0.953667	0.948	0.93	0.935667	0.941667	0.940667
1663	0.985333	0.981333	0.967	0.961667	0.953333	0.966667	0.969333	0.941	0.935	0.954667	0.939333	0.931667	0.953667	0.947667	0.93	0.935667	0.941667	0.940667
1664	0.985333	0.981333	0.967	0.961667	0.953333	0.966667	0.969333	0.941	0.934667	0.954667	0.939333	0.931333	0.953667	0.947667	0.93	0.935667	0.941667	0.940667
1665	0.985333	0.981333	0.967	0.961667	0.953	0.966667	0.969333	0.941	0.934667	0.954667	0.939333	0.931333	0.953667	0.947667	0.93	0.935667	0.941667	0.940667
1666	0.985	0.981333	0.967	0.961667	0.953	0.966667	0.969	0.941	0.934667	0.954667	0.939333	0.931333	0.953667	0.947667	0.93	0.935667	0.941667	0.940667
1667	0.985	0.981333	0.967	0.961667	0.953	0.966667	0.969	0.941	0.934667	0.954667	0.939333	0.931333	0.953667	0.947667	0.93	0.935667	0.941667	0.940667
1668	0.985	0.981333	0.967	0.961667	0.953	0.966667	0.969	0.941	0.934667	0.954333	0.939333	0.931333	0.953667	0.947667	0.93	0.935667	0.941667	0.940667
1669	0.985	0.981333	0.967	0.961667	0.953	0.966667	0.969	0.941	0.934667	0.954333	0.939	0.931333	0.953667	0.947667	0.93	0.935667	0.941667	0.940667
1670	0.985	0.981333	0.967	0.961667	0.953	0.966667	0.969	0.941	0.934667	0.954333	0.939	0.931333	0.953333	0.947667	0.93	0.935667	0.941667	0.940667
1671	0.985	0.981333	0.966667	0.961667	0.953	0.966667	0.969	0.941	0.934667	0.954333	0.939	0.931333	0.953333	0.947333	0.93	0.935667	0.941667	0.940667
1672	0.985	0.981333	0.966667	0.961667	0.953	0.966667	0.969	0.940667	0.934667	0.954333	0.939	0.931333	0.953333	0.947333	0.93	0.935667	0.941667	0.940667
1673	0.985	0.981333	0.966667	0.961667	0.953	0.966667	0.969	0.940667	0.934667	0.954333	0.939	0.931333	0.953333	0.947333	0.93	0.935667	0.941667	0.940667
1674	0.985	0.981333	0.966667	0.961667	0.953	0.966667	0.969	0.940667	0.934667	0.954333	0.939	0.931333	0.953333	0.947333	0.929667	0.935333	0.941333	0.940667
1675	0.985	0.981333	0.966667	0.961333	0.953	0.966667	0.969	0.940667	0.934333	0.954333	0.939	0.931333	0.953333	0.947333	0.929667	0.935333	0.941333	0.940667
1676	0.985	0.981333	0.966667	0.961333	0.953	0.966667	0.969	0.940667	0.934333	0.954333	0.939	0.931333	0.953333	0.947333	0.929667	0.935333	0.941333	0.940333
1677	0.985	0.981333	0.966667	0.961333	0.953	0.966667	0.969	0.940667	0.934333	0.954333	0.939	0.931333	0.953333	0.947333	0.929667	0.935333	0.941333	0.940333
1678	0.985	0.981333	0.966667	0.961333	0.953	0.966667	0.969	0.940667	0.934333	0.954333	0.939	0.931333	0.953333	0.947333	0.929667	0.935333	0.941333	0.940333
1679	0.985	0.981	0.966667	0.961333	0.952667	0.966333	0.969	0.940667	0.934333	0.954333	0.939	0.931333	0.953333	0.947333	0.929667	0.935333	0.941333	0.940333
1680	0.985	0.981	0.966667	0.961333	0.952667	0.966333	0.969	0.940667	0.934333	0.954333	0.939	0.931333	0.953333	0.947333	0.929667	0.935333	0.941333	0.940333
1681	0.985	0.981	0.966667	0.961333	0.952667	0.966333	0.968667	0.940667	0.934333	0.954	0.939	0.931	0.953	0.947333	0.929667	0.935333	0.941333	0.940333
1682	0.985	0.981	0.966667	0.961333	0.952667	0.966333	0.968667	0.940667	0.934333	0.954	0.939	0.931	0.953	0.947333	0.929667	0.935	0.941333	0.940333
1683	0.985	0.981	0.966667	0.961333	0.952667	0.966333	0.968667	0.940667	0.934333	0.954	0.939	0.931	0.953	0.947333	0.929667	0.935	0.941333	0.940333
1684	0.985	0.981	0.966667	0.961333	0.952667	0.966333	0.968667	0.940667	0.934333	0.954	0.939	0.931	0.953	0.947333	0.929667	0.935	0.941	0.940333
1685	0.985	0.981	0.966667	0.961333	0.952667	0.966333	0.968667	0.940667	0.934	0.954	0.939	0.931	0.953	0.947333	0.929667	0.935	0.941	0.940333
1686	0.985	0.981	0.966667	0.961333	0.952667	0.966333	0.968667	0.940667	0.934	0.954	0.939	0.931	0.953	0.947333	0.929667	0.935	0.941	0.940333
1687	0.985	0.981	0.966667	0.961333	0.952667	0.966333	0.968667	0.940667	0.934	0.954	0.939	0.931	0.953	0.947333	0.929667	0.935	0.941	0.940333
1688	0.985	0.981	0.966667	0.961333	0.952667	0.966333	0.968667	0.940667	0.934	0.954	0.939	0.931	0.953	0.947333	0.929667	0.935	0.941	0.940333
1689	0.985	0.981	0.966667	0.961333	0.952333	0.966333	0.968667	0.940667	0.934	0.954	0.939	0.931	0.953	0.947	0.929333	0.935	0.941	0.940333
1690	0.985	0.981	0.966667	0.961333	0.952333	0.966333	0.968667	0.940667	0.934	0.954	0.939	0.931	0.952667	0.947	0.929333	0.934667	0.941	0.940333
1691	0.985	0.981	0.966667	0.961333	0.952333	0.966333	0.968667	0.940667	0.934	0.954	0.939	0.931	0.952667	0.947	0.929333	0.934667	0.941	0.94
1692	0.985	0.981	0.966667	0.961333	0.952333	0.966333	0.968667	0.940667	0.934	0.954	0.939	0.931	0.952667	0.947	0.929333	0.934667	0.941	0.94
1693	0.985	0.981	0.966667	0.961333	0.952333	0.966	0.968667	0.940667	0.934	0.954	0.939	0.931	0.952667	0.947	0.929333	0.934667	0.941	0.94
1694	0.985	0.981	0.966667	0.961333	0.952333	0.966	0.968667	0.940667	0.934	0.954	0.939	0.931	0.952667	0.947	0.929333	0.934667	0.941	0.94
1695	0.985	0.981	0.966667	0.961333	0.952333	0.966	0.968667	0.940667	0.933667	0.954	0.939	0.931	0.952667	0.947	0.929333	0.934667	0.941	0.94
1696	0.985	0.981	0.966667	0.961	0.952333	0.966	0.968667	0.940667	0.933667	0.954	0.939	0.931	0.952667	0.947	0.929333	0.934667	0.941	0.94
1697	0.985	0.981	0.966667	0.961	0.952333	0.966	0.968667	0.940667	0.933667	0.954	0.939	0.931	0.952667	0.947	0.929333	0.934667	0.941	0.94
1698	0.985	0.981	0.966333	0.961	0.952333	0.966	0.968667	0.940667	0.933667	0.954	0.939	0.930667	0.952667	0.947	0.929333	0.934667	0.940667	0.94
1699	0.985	0.981	0.966333	0.961	0.952333	0.966	0.968333	0.940333	0.933667	0.954	0.939	0.930667	0.952667	0.947	0.929333	0.934667	0.940667	0.94
1700	0.985	0.981	0.966333	0.961	0.952333	0.966	0.968333	0.940333	0.933667	0.954	0.939	0.930667	0.952667	0.946667	0.929333	0.934667	0.940667	0.94
1701	0.985	0.981	0.966333	0.961	0.952333	0.966	0.968333	0.940333	0.933667	0.954	0.938667	0.930667	0.952667	0.946667	0.929333	0.934667	0.940667	0.94
1702	0.985	0.981	0.966333	0.961	0.952333	0.966	0.968333	0.940333	0.933667	0.954	0.938667	0.930667	0.952667	0.946667	0.929333	0.934333	0.940667	0.939667
1703	0.985	0.981	0.966333	0.961	0.952333	0.966	0.968333	0.940333	0.933667	0.954	0.938667	0.930667	0.952667	0.946667	0.929	0.934333	0.940667	0.939667
1704	0.985	0.981	0.966333	0.961	0.952333	0.965667	0.968333	0.940333	0.933667	0.954	0.938667	0.930667	0.952667	0.946667	0.929	0.934333	0.940667	0.939667
1705	0.984667	0.980667	0.966333	0.961	0.952333	0.965667	0.968333	0.940333	0.933667	0.953667	0.938667	0.930667	0.952333	0.946667	0.929	0.934333	0.940667	0.939667
1706	0.984667	0.980667	0.966333	0.961	0.952333	0.965667	0.968333	0.940333	0.933667	0.953667	0.938667	0.930667	0.952333	0.946667	0.929	0.934333	0.940667	0.939667
1707	0.984667	0.980667	0.966333	0.960667	0.952333	0.965667	0.968333	0.940333	0.933667	0.953667	0.938667	0.930667	0.952333	0.946667	0.929	0.934333	0.940667	0.939667
1709	0.984667	0.980667	0.966333	0.960667	0.952333	0.965667	0.968333	0.940333	0.933667	0.953667	0.938667	0.930667	0.952333	0.946667	0.929	0.934333	0.940667	0.939667
1710	0.984667	0.980667	0.966333	0.960667	0.952333	0.965667	0.968333	0.940333	0.933667	0.953667	0.938667	0.930667	0.952333	0.946667	0.929	0.934	0.940667	0.939667
1711	0.984667	0.980667	0.966333	0.960667	0.952	0.965667	0.968333	0.940333	0.933667	0.953667	0.938667	0.930333	0.952333	0.946667	0.929	0.934	0.940667	0.939333
1712	0.984667	0.980667	0.966333	0.960667	0.952	0.965667	0.968333	0.940333	0.933667	0.953667	0.938667	0.930333	0.952333	0.946667	0.929	0.934	0.940667	0.939333
1713	0.984667	0.980667	0.966	0.960667	0.952	0.965667	0.968	0.940333	0.933667	0.953667	0.938667	0.930333	0.952333	0.946333	0.929	0.934	0.940667	0.939333
1714	0.984667	0.980667	0.966	0.960667	0.952	0.965667	0.968	0.940333	0.933667	0.953667	0.938667	0.930333	0.952333	0.946333	0.929	0.934	0.940333	0.939333
1715	0.984667	0.980667	0.966	0.960667	0.952	0.965333	0.968	0.940333	0.933667	0.953667	0.938667	0.930333	0.952333	0.946333	0.929	0.934	0.940333	0.939333
1716	0.984667	0.980667	0.966	0.960667	0.952	0.965333	0.968	0.940333	0.933333	0.953667	0.938667	0.930333	0.952333	0.946333	0.929	0.933667	0.940333	0.939333
1717	0.984667	0.980667	0.966	0.960667	0.952	0.965333	0.968	0.940333	0.933333	0.953667	0.938667	0.930333	0.952333	0.946333	0.929	0.933667	0.940333	0.939333
1718	0.984667	0.980667	0.966	0.960333	0.952	0.965333	0.968	0.940333	0.933333	0.953667	0.938333	0.930333	0.952	0.946333	0.929	0.933667	0.940333	0.939333
1719	0.984667	0.980667	0.966	0.960333	0.952	0.965333	0.968	0.940333	0.933333	0.953667	0.938333	0.930333	0.952	0.946333	0.929	0.933667	0.940333	0.939
1720	0.984667	0.980667	0.966	0.960333	0.952	0.965333	0.968	0.940333	0.933333	0.953667	0.938333	0.930333	0.952	0.946333	0.929	0.933667	0.940333	0.939
1721	0.984667	0.980667	0.966	0.960333	0.952	0.965333	0.968	0.940333	0.933333	0.953333	0.938333	0.930333	0.952	0.946333	0.929	0.933667	0.940333	0.939
1722	0.984667	0.980667	0.966	0.960333	0.952	0.965333	0.968	0.940333	0.933333	0.953333	0.938333	0.930333	0.952	0.946333	0.929	0.933333	0.94	0.939
1723	0.984667	0.980667	0.966	0.960333	0.952	0.965333	0.968	0.940333	0.933333	0.953333	0.938333	0.930333	0.952	0.946333	0.929	0.933333	0.94	0.939
1724	0.984667	0.980667	0.966	0.960333	0.952	0.965333	0.968	0.940333	0.933333	0.953333	0.938333	0.930333	0.952	0.946333	0.928667	0.933333	0.94	0.939
1725	0.984667	0.980667	0.966	0.960333	0.952	0.965333	0.968	0.940333	0.933333	0.953333	0.938333	0.930333	0.952	0.946333	0.928667	0.933333	0.94	0.939
1726	0.984667	0.980667	0.966	0.960333	0.952	0.965333	0.968	0.940333	0.933333	0.953333	0.938333	0.930333	0.952	0.946333	0.928667	0.933333	0.94	0.939
1727	0.984667	0.980667	0.966	0.960333	0.952	0.965333	0.967667	0.94	0.933333	0.953333	0.938333	0.930333	0.952	0.946333	0.928667	0.933333	0.94	0.939
1728	0.984667	0.980667	0.966	0.960333	0.952	0.965333	0.967667	0.94	0.933333	0.953333	0.938333	0.930333	0.952	0.946333	0.928667	0.933333	0.94	0.939
1729	0.984667	0.980667	0.966	0.960333	0.952	0.965333	0.967667	0.94	0.933333	0.953333	0.938333	0.93	0.952	0.946333	0.928667	0.933333	0.94	0.939
1730	0.984667	0.980667	0.966	0.960333	0.952	0.965333	0.967667	0.94	0.933333	0.953333	0.938333	0.93	0.952	0.946333	0.928667	0.933333	0.94	0.939
1731	0.984667	0.980667	0.966	0.960333	0.952	0.965333	0.967667	0.94	0.933	0.953333	0.938333	0.93	0.952	0.946	0.928667	0.933333	0.94	0.939
1732	0.984667	0.980667	0.966	0.960333	0.952	0.965333	0.967667	0.94	0.933	0.953333	0.938333	0.93	0.952	0.946	0.928667	0.933333	0.94	0.939
1733	0.984667	0.980667	0.966	0.960333	0.952	0.965333	0.967667	0.94	0.933	0.953	0.938333	0.93	0.952	0.946	0.928667	0.933333	0.939667	0.939
1734	0.984667	0.980667	0.966	0.960333	0.952	0.965333	0.967667	0.94	0.933	0.953	0.938333	0.93	0.952	0.946	0.928667	0.933	0.939667	0.938667
1735	0.984667	0.980667	0.966	0.960333	0.952	0.965333	0.967667	0.94	0.933	0.953	0.938333	0.93	0.951667	0.946	0.928667	0.933	0.939667	0.938667
1736	0.984667	0.980667	0.966	0.960333	0.952	0.965333	0.967667	0.94	0.933	0.953	0.938333	0.93	0.951667	0.946	0.928667	0.933	0.939667	0.938667
1737	0.984667	0.980667	0.966	0.960333	0.952	0.965333	0.967333	0.94	0.933	0.953	0.938333	0.93	0.951667	0.946	0.928667	0.933	0.939667	0.938667
1738	0.984667	0.980667	0.966	0.960333	0.951667	0.965333	0.967333	0.94	0.933	0.953	0.938	0.93	0.951667	0.946	0.928667	0.933	0.939667	0.938667
1739	0.984667	0.980667	0.966	0.960333	0.951667	0.965333	0.967333	0.94	0.933	0.953	0.938	0.93	0.951667	0.946	0.928333	0.933	0.939667	0.938667
1740	0.984667	0.980667	0.966	0.960333	0.951667	0.965333	0.967333	0.94	0.933	0.953	0.938	0.93	0.951667	0.946	0.928333	0.933	0.939667	0.938667
1741	0.984667	0.980333	0.966	0.960333	0.951667	0.965333	0.967333	0.94	0.933	0.953	0.938	0.93	0.951667	0.946	0.928333	0.932667	0.939667	0.938667
1742	0.984667	0.980333	0.966	0.960333	0.951667	0.965333	0.967333	0.94	0.933	0.953	0.938	0.93	0.951667	0.946	0.928333	0.932667	0.939667	0.938667
1743	0.984333	0.980333	0.966	0.960333	0.951667	0.965333	0.967333	0.94	0.933	0.953	0.938	0.93	0.951667	0.946	0.928333	0.932667	0.939667	0.938667
1744	0.984333	0.980333	0.966	0.960333	0.951667	0.965333	0.967333	0.94	0.933	0.953	0.938	0.929667	0.951667	0.946	0.928333	0.932667	0.939667	0.938667
1745	0.984333	0.980333	0.966	0.960333	0.951667	0.965333	0.967333	0.939667	0.933	0.952667	0.938	0.929667	0.951667	0.946	0.928333	0.932667	0.939333	0.938667
1746	0.984333	0.980333	0.966	0.960333	0.951333	0.965333	0.967333	0.939667	0.933	0.952667	0.938	0.929667	0.951333	0.946	0.928333	0.932667	0.939333	0.938667
1747	0.984333	0.980333	0.966	0.960333	0.951333	0.965333	0.967333	0.939667	0.933	0.952667	0.937667	0.929667	0.951333	0.946	0.928333	0.932667	0.939333	0.938667
1748	0.984333	0.980333	0.966	0.960333	0.951333	0.965333	0.967333	0.939667	0.933	0.952667	0.937667	0.929667	0.951333	0.945667	0.928333	0.932667	0.939333	0.938333
1749	0.984333	0.980333	0.966	0.96	0.951333	0.965333	0.967333	0.939667	0.933	0.952667	0.937667	0.929667	0.951333	0.945667	0.928333	0.932333	0.939333	0.938333
1750	0.984333	0.980333	0.966	0.96	0.951333	0.965333	0.967333	0.939667	0.933	0.952667	0.937667	0.929667	0.951333	0.945667	0.928333	0.932333	0.939333	0.938333
1751	0.984333	0.980333	0.966	0.96	0.951333	0.965333	0.967333	0.939667	0.933	0.952667	0.937667	0.929667	0.951333	0.945667	0.928333	0.932333	0.939333	0.938333
1752	0.984333	0.980333	0.966	0.96	0.951333	0.965333	0.967333	0.939667	0.933	0.952667	0.937667	0.929667	0.951333	0.945667	0.928333	0.932333	0.939333	0.938333
1753	0.984333	0.980333	0.966	0.96	0.951333	0.965333	0.967333	0.939667	0.933	0.952667	0.937667	0.929667	0.951333	0.945667	0.928333	0.932333	0.939333	0.938333
1754	0.984333	0.980333	0.966	0.96	0.951333	0.965333	0.967333	0.939667	0.933	0.952667	0.937667	0.929667	0.951333	0.945667	0.928333	0.932333	0.939	0.938333
1755	0.984333	0.980333	0.966	0.96	0.951333	0.965333	0.967333	0.939667	0.933	0.952667	0.937667	0.929667	0.951	0.945667	0.928333	0.932333	0.939	0.938333
1756	0.984333	0.980333	0.965667	0.96	0.951333	0.965333	0.967	0.939667	0.933	0.952667	0.937667	0.929667	0.951	0.945667	0.928333	0.932333	0.939	0.938333
1757	0.984333	0.980333	0.965667	0.96	0.951333	0.965333	0.967	0.939333	0.933	0.952667	0.937333	0.929667	0.951	0.945667	0.928333	0.932333	0.939	0.938333
1758	0.984333	0.980333	0.965667	0.96	0.951333	0.965333	0.967	0.939333	0.933	0.952667	0.937333	0.929667	0.951	0.945667	0.928333	0.932333	0.939	0.938333
1759	0.984333	0.980333	0.965667	0.96	0.951	0.965333	0.967	0.939333	0.933	0.952667	0.937333	0.929667	0.951	0.945667	0.928333	0.932333	0.939	0.938333
1760	0.984333	0.980333	0.965667	0.959667	0.951	0.965333	0.967	0.939333	0.933	0.952667	0.937333	0.929667	0.951	0.945667	0.928333	0.932333	0.939	0.938333
1761	0.984333	0.980333	0.965667	0.959667	0.951	0.965333	0.967	0.939333	0.933	0.952667	0.937333	0.929667	0.951	0.945333	0.928333	0.932	0.939	0.938
1762	0.984333	0.980333	0.965667	0.959667	0.951	0.965333	0.967	0.939333	0.933	0.952667	0.937333	0.929667	0.951	0.945333	0.928333	0.932	0.939	0.938
1763	0.984333	0.980333	0.965667	0.959667	0.951	0.965	0.967	0.939333	0.933	0.952667	0.937333	0.929667	0.951	0.945333	0.928	0.932	0.939	0.938
1764	0.984333	0.980333	0.965667	0.959667	0.951	0.965	0.967	0.939333	0.933	0.952667	0.937333	0.929667	0.951	0.945333	0.928	0.932	0.939	0.938
1765	0.984333	0.980333	0.965667	0.959667	0.951	0.965	0.967	0.939333	0.933	0.952667	0.937333	0.929667	0.951	0.945333	0.928	0.932	0.939	0.938
1766	0.984333	0.980333	0.965667	0.959667	0.951	0.965	0.967	0.939333	0.933	0.952667	0.937333	0.929333	0.950667	0.945333	0.928	0.932	0.939	0.938
1767	0.984333	0.980333	0.965667	0.959667	0.951	0.965	0.967	0.939333	0.933	0.952667	0.937333	0.929333	0.950667	0.945333	0.928	0.932	0.939	0.938
1768	0.984333	0.980333	0.965667	0.959667	0.951	0.965	0.966667	0.939333	0.932667	0.952667	0.937333	0.929333	0.950667	0.945333	0.928	0.932	0.938667	0.938
1769	0.984333	0.980333	0.965667	0.959667	0.951	0.965	0.966667	0.939333	0.932667	0.952667	0.937333	0.929333	0.950667	0.945333	0.928	0.932	0.938667	0.938
1770	0.984333	0.980333	0.965667	0.959667	0.951	0.965	0.966667	0.939333	0.932667	0.952667	0.937333	0.929333	0.950667	0.945333	0.928	0.931667	0.938667	0.938
1771	0.984333	0.980333	0.965667	0.959667	0.951	0.965	0.966667	0.939333	0.932667	0.952667	0.937333	0.929333	0.950667	0.945333	0.928	0.931667	0.938667	0.938
1772	0.984333	0.980333	0.965667	0.959667	0.951	0.965	0.966667	0.939333	0.932667	0.952667	0.937333	0.929333	0.950667	0.945333	0.928	0.931667	0.938667	0.938
1773	0.984333	0.980333	0.965667	0.959667	0.951	0.965	0.966667	0.939333	0.932667	0.952667	0.937333	0.929333	0.950667	0.945333	0.928	0.931667	0.938667	0.938
1774	0.984333	0.980333	0.965667	0.959667	0.951	0.965	0.966667	0.939333	0.932667	0.952667	0.937333	0.929333	0.950667	0.945333	0.928	0.931667	0.938667	0.938
1775	0.984333	0.980333	0.965667	0.959333	0.951	0.965	0.966667	0.939333	0.932667	0.952667	0.937333	0.929333	0.950667	0.945333	0.928	0.931667	0.938667	0.938
1777	0.984333	0.980333	0.965667	0.959333	0.951	0.964667	0.966667	0.939333	0.932667	0.952667	0.937	0.929333	0.950667	0.945333	0.927667	0.931667	0.938667	0.938
1778	0.984333	0.980333	0.965667	0.959333	0.951	0.964667	0.966667	0.939	0.932667	0.952667	0.937	0.929	0.950667	0.945333	0.927667	0.931667	0.938667	0.938
1779	0.984333	0.98	0.965667	0.959333	0.951	0.964667	0.966667	0.939	0.932667	0.952667	0.937	0.929	0.950667	0.945	0.927667	0.931667	0.938667	0.938
1780	0.984333	0.98	0.965667	0.959333	0.951	0.964667	0.966667	0.939	0.932667	0.952667	0.937	0.929	0.950333	0.945	0.927667	0.931333	0.938667	0.938
1781	0.984333	0.98	0.965667	0.959333	0.950667	0.964667	0.966667	0.939	0.932667	0.952667	0.937	0.929	0.950333	0.945	0.927667	0.931333	0.938333	0.938
1782	0.984333	0.98	0.965667	0.959333	0.950667	0.964667	0.966667	0.939	0.932667	0.952667	0.937	0.929	0.950333	0.945	0.927667	0.931333	0.938333	0.937667
1783	0.984333	0.98	0.965667	0.959333	0.950667	0.964667	0.966667	0.939	0.932667	0.952667	0.937	0.929	0.950333	0.945	0.927667	0.931333	0.938333	0.937667
1784	0.984333	0.98	0.965667	0.959333	0.950667	0.964667	0.966667	0.939	0.932667	0.952667	0.937	0.929	0.950333	0.945	0.927667	0.931333	0.938333	0.937667
1785	0.984333	0.98	0.965667	0.959333	0.950667	0.964667	0.966667	0.939	0.932667	0.952667	0.937	0.929	0.950333	0.945	0.927667	0.931333	0.938333	0.937667
1786	0.984333	0.98	0.965667	0.959333	0.950667	0.964667	0.966667	0.939	0.932667	0.952667	0.937	0.929	0.950333	0.945	0.927667	0.931333	0.938333	0.937667
1787	0.984333	0.98	0.965333	0.959333	0.950667	0.964667	0.966667	0.939	0.932333	0.952667	0.937	0.929	0.950333	0.945	0.927667	0.931333	0.938333	0.937667
1788	0.984333	0.98	0.965333	0.959333	0.950667	0.964667	0.966667	0.939	0.932333	0.952333	0.937	0.929	0.95	0.945	0.927667	0.931333	0.938333	0.937667
1789	0.984333	0.98	0.965333	0.959333	0.950667	0.964667	0.966667	0.939	0.932333	0.952333	0.937	0.929	0.95	0.945	0.927667	0.931	0.938333	0.937667
1790	0.984333	0.98	0.965333	0.959333	0.950667	0.964667	0.966667	0.938667	0.932333	0.952333	0.937	0.929	0.95	0.945	0.927667	0.931	0.938333	0.937667
1791	0.984333	0.98	0.965333	0.959333	0.950667	0.964667	0.966667	0.938667	0.932333	0.952333	0.937	0.929	0.95	0.944667	0.927667	0.931	0.938333	0.937667
1792	0.984333	0.98	0.965333	0.959333	0.950667	0.964667	0.966667	0.938667	0.932333	0.952333	0.937	0.929	0.95	0.944667	0.927333	0.931	0.938333	0.937667
1793	0.984333	0.98	0.965333	0.959333	0.950667	0.964667	0.966333	0.938667	0.932333	0.952333	0.937	0.929	0.95	0.944667	0.927333	0.931	0.938333	0.937667
1794	0.984333	0.98	0.965333	0.959333	0.950667	0.964667	0.966333	0.938667	0.932333	0.952333	0.937	0.928667	0.95	0.944667	0.927333	0.931	0.938333	0.937667
1795	0.984333	0.98	0.965333	0.959333	0.950667	0.964667	0.966333	0.938667	0.932333	0.952333	0.937	0.928667	0.95	0.944667	0.927333	0.931	0.938333	0.937667
1796	0.984333	0.98	0.965333	0.959333	0.950333	0.964667	0.966333	0.938667	0.932333	0.952333	0.937	0.928667	0.95	0.944667	0.927333	0.931	0.938	0.937667
1797	0.984333	0.979667	0.965333	0.959333	0.950333	0.964667	0.966333	0.938667	0.932333	0.952	0.937	0.928667	0.949667	0.944667	0.927333	0.931	0.938	0.937667
1798	0.984333	0.979667	0.965333	0.959333	0.950333	0.964667	0.966333	0.938667	0.932333	0.952	0.937	0.928667	0.949667	0.944667	0.927333	0.931	0.938	0.937667
1799	0.984333	0.979667	0.965333	0.959333	0.950333	0.964667	0.966333	0.938667	0.932333	0.952	0.937	0.928667	0.949667	0.944667	0.927333	0.930667	0.938	0.937667
1800	0.984333	0.979667	0.965333	0.959333	0.950333	0.964667	0.966333	0.938667	0.932333	0.952	0.937	0.928667	0.949667	0.944667	0.927333	0.930667	0.938	0.937667
1801	0.984333	0.979667	0.965333	0.959	0.950333	0.964667	0.966333	0.938667	0.932	0.952	0.936667	0.928667	0.949667	0.944667	0.927333	0.930667	0.938	0.937667
1802	0.984333	0.979667	0.965333	0.959	0.950333	0.964667	0.966333	0.938333	0.932	0.952	0.936667	0.928667	0.949667	0.944667	0.927333	0.930667	0.938	0.937667
1803	0.984333	0.979667	0.965333	0.959	0.950333	0.964667	0.966333	0.938333	0.932	0.952	0.936667	0.928667	0.949667	0.944667	0.927333	0.930667	0.938	0.937667
1804	0.984333	0.979667	0.965333	0.959	0.950333	0.964667	0.966333	0.938333	0.932	0.952	0.936667	0.928667	0.949667	0.944667	0.927333	0.930667	0.938	0.937333
1805	0.984333	0.979667	0.965333	0.959	0.950333	0.964667	0.966333	0.938333	0.932	0.952	0.936667	0.928667	0.949667	0.944667	0.927333	0.930667	0.938	0.937333
1806	0.984333	0.979667	0.965333	0.959	0.950333	0.964667	0.966333	0.938333	0.932	0.951667	0.936667	0.928667	0.949667	0.944667	0.927333	0.930667	0.937667	0.937333
1807	0.984333	0.979667	0.965333	0.959	0.950333	0.964667	0.966	0.938333	0.932	0.951667	0.936667	0.928667	0.949667	0.944667	0.927	0.930333	0.937667	0.937333
1808	0.984333	0.979667	0.965333	0.959	0.950333	0.964333	0.966	0.938333	0.932	0.951667	0.936667	0.928667	0.949667	0.944667	0.927	0.930333	0.937667	0.937333
1809	0.984333	0.979667	0.965333	0.959	0.950333	0.964333	0.966	0.938333	0.932	0.951667	0.936667	0.928667	0.949667	0.944667	0.927	0.930333	0.937667	0.937333
1810	0.984333	0.979667	0.965333	0.959	0.950333	0.964333	0.966	0.938333	0.932	0.951667	0.936667	0.928333	0.949667	0.944667	0.927	0.930333	0.937667	0.937333
1811	0.984333	0.979667	0.965333	0.959	0.950333	0.964333	0.966	0.938333	0.932	0.951667	0.936667	0.928333	0.949667	0.944667	0.927	0.930333	0.937667	0.937333
1812	0.984333	0.979667	0.965333	0.959	0.950333	0.964333	0.966	0.938333	0.932	0.951667	0.936667	0.928333	0.949333	0.944667	0.927	0.930333	0.937667	0.937333
1813	0.984333	0.979667	0.965333	0.959	0.950333	0.964333	0.966	0.938333	0.932	0.951667	0.936667	0.928333	0.949333	0.944667	0.927	0.930333	0.937667	0.937333
1814	0.984333	0.979667	0.965333	0.959	0.950333	0.964333	0.966	0.938	0.932	0.951667	0.936667	0.928333	0.949333	0.944667	0.927	0.93	0.937333	0.937333
1815	0.984333	0.979667	0.965333	0.959	0.950333	0.964333	0.966	0.938	0.932	0.951667	0.936667	0.928333	0.949333	0.944333	0.927	0.93	0.937333	0.937
1817	0.984333	0.979667	0.965333	0.959	0.950333	0.964333	0.966	0.938	0.932	0.951667	0.936667	0.928333	0.949333	0.944333	0.927	0.93	0.937333	0.937
1817	0.984333	0.979667	0.965333	0.959	0.950333	0.964333	0.966	0.938	0.932	0.951667	0.936667	0.928333	0.949333	0.944333	0.927	0.93	0.937333	0.937
1818	0.984333	0.979667	0.965333	0.959	0.950333	0.964333	0.966	0.938	0.932	0.951667	0.936667	0.928333	0.949333	0.944333	0.927	0.93	0.937333	0.937
1819	0.984333	0.979667	0.965333	0.959	0.950333	0.964333	0.966	0.938	0.932	0.951667	0.936667	0.928333	0.949333	0.944333	0.927	0.93	0.937333	0.937
1820	0.984333	0.979667	0.965333	0.958667	0.950333	0.964333	0.966	0.938	0.932	0.951667	0.936667	0.928333	0.949333	0.944333	0.927	0.93	0.937333	0.937
1821	0.984333	0.979667	0.965333	0.958667	0.950333	0.964333	0.966	0.938	0.932	0.951667	0.936667	0.928333	0.949333	0.944333	0.927	0.93	0.937333	0.937
1822	0.984333	0.979667	0.965333	0.958667	0.950333	0.964333	0.966	0.938	0.932	0.951667	0.936667	0.928333	0.949333	0.944333	0.927	0.93	0.937333	0.937
1824	0.984333	0.979667	0.965333	0.958667	0.95	0.964333	0.966	0.938	0.932	0.951667	0.936333	0.928333	0.949	0.944333	0.926667	0.93	0.937333	0.937
1824	0.984333	0.979667	0.965333	0.958667	0.95	0.964333	0.966	0.938	0.932	0.951667	0.936333	0.928333	0.949	0.944333	0.926667	0.93	0.937333	0.937
1825	0.984333	0.979667	0.965333	0.958667	0.95	0.964333	0.966	0.938	0.932	0.951667	0.936333	0.928333	0.949	0.944333	0.926667	0.93	0.937	0.937
1826	0.984333	0.979667	0.965	0.958667	0.95	0.964	0.966	0.938	0.932	0.951667	0.936333	0.928333	0.949	0.944	0.926667	0.93	0.937	0.937
1827	0.984333	0.979667	0.965	0.958667	0.95	0.964	0.966	0.938	0.932	0.951667	0.936333	0.928333	0.949	0.944	0.926667	0.93	0.937	0.937
1828	0.984333	0.979667	0.965	0.958667	0.95	0.964	0.966	0.938	0.931667	0.951667	0.936333	0.928333	0.949	0.944	0.926667	0.93	0.937	0.937
1829	0.984333	0.979667	0.965	0.958667	0.95	0.964	0.965667	0.938	0.931667	0.951333	0.936333	0.928333	0.949	0.944	0.926667	0.93	0.937	0.937
1831	0.984333	0.979667	0.965	0.958667	0.95	0.964	0.965667	0.938	0.931667	0.951333	0.936333	0.928	0.949	0.944	0.926667	0.93	0.937	0.937
1831	0.984333	0.979667	0.965	0.958667	0.95	0.964	0.965667	0.938	0.931667	0.951333	0.936333	0.928	0.949	0.944	0.926667	0.93	0.937	0.937
1832	0.984333	0.979667	0.965	0.958667	0.95	0.964	0.965667	0.938	0.931667	0.951333	0.936333	0.928	0.949	0.944	0.926667	0.929667	0.937	0.937
1833	0.984333	0.979667	0.965	0.958667	0.95	0.964	0.965667	0.938	0.931667	0.951333	0.936333	0.928	0.949	0.944	0.926667	0.929667	0.937	0.937
1834	0.984	0.979667	0.965	0.958667	0.95	0.964	0.965667	0.938	0.931667	0.951333	0.936333	0.928	0.949	0.944	0.926667	0.929667	0.937	0.936667
1836	0.984	0.979667	0.965	0.958667	0.949667	0.964	0.965667	0.938	0.931667	0.951333	0.936	0.928	0.949	0.944	0.926667	0.929667	0.937	0.936667
1837	0.984	0.979667	0.965	0.958667	0.949667	0.964	0.965667	0.938	0.931667	0.951333	0.936	0.928	0.949	0.944	0.926667	0.929667	0.937	0.936667
1838	0.984	0.979667	0.965	0.958667	0.949667	0.964	0.965667	0.938	0.931667	0.951333	0.936	0.928	0.949	0.944	0.926667	0.929667	0.937	0.936667
1839	0.984	0.979667	0.965	0.958667	0.949667	0.964	0.965667	0.938	0.931667	0.951333	0.936	0.928	0.949	0.944	0.926667	0.929667	0.937	0.936667
1840	0.984	0.979667	0.965	0.958667	0.949667	0.964	0.965667	0.938	0.931667	0.951333	0.936	0.928	0.949	0.944	0.926667	0.929667	0.936667	0.936667
1841	0.984	0.979667	0.965	0.958667	0.949667	0.964	0.965333	0.938	0.931667	0.951333	0.936	0.928	0.948667	0.944	0.926667	0.929667	0.936667	0.936667
1842	0.984	0.979667	0.965	0.958667	0.949667	0.964	0.965333	0.938	0.931667	0.951333	0.936	0.928	0.948667	0.944	0.926667	0.929667	0.936667	0.936667
1843	0.984	0.979667	0.965	0.958667	0.949667	0.964	0.965333	0.938	0.931667	0.951333	0.936	0.928	0.948667	0.944	0.926333	0.929333	0.936667	0.936667
1844	0.984	0.979667	0.965	0.958667	0.949667	0.964	0.965333	0.938	0.931667	0.951333	0.936	0.928	0.948667	0.944	0.926333	0.929333	0.936667	0.936667
1845	0.984	0.979667	0.965	0.958333	0.949667	0.964	0.965333	0.938	0.931667	0.951333	0.936	0.928	0.948667	0.944	0.926333	0.929333	0.936667	0.936667
1846	0.984	0.979667	0.965	0.958333	0.949667	0.964	0.965333	0.938	0.931667	0.951333	0.936	0.928	0.948667	0.944	0.926333	0.929333	0.936667	0.936667
1847	0.984	0.979667	0.965	0.958333	0.949667	0.964	0.965333	0.937667	0.931667	0.951333	0.936	0.928	0.948667	0.944	0.926333	0.929333	0.936667	0.936667
1848	0.984	0.979667	0.965	0.958333	0.949667	0.964	0.965333	0.937667	0.931667	0.951333	0.936	0.928	0.948667	0.944	0.926333	0.929333	0.936667	0.936333
1849	0.984	0.979667	0.965	0.958333	0.949667	0.964	0.965333	0.937667	0.931667	0.951333	0.936	0.928	0.948667	0.944	0.926333	0.929333	0.936667	0.936333
1850	0.984	0.979333	0.965	0.958333	0.949667	0.964	0.965333	0.937667	0.931667	0.951333	0.935667	0.928	0.948667	0.944	0.926333	0.929333	0.936667	0.936333
1851	0.984	0.979333	0.965	0.958333	0.949667	0.964	0.965333	0.937667	0.931667	0.951	0.935667	0.928	0.948667	0.944	0.926333	0.929333	0.936333	0.936333
1852	0.984	0.979333	0.965	0.958333	0.949667	0.964	0.965333	0.937667	0.931667	0.951	0.935667	0.928	0.948667	0.944	0.926333	0.929333	0.936333	0.936333
1853	0.984	0.979333	0.965	0.958333	0.949667	0.964	0.965333	0.937667	0.931667	0.951	0.935667	0.928	0.948333	0.944	0.926333	0.929333	0.936333	0.936333
1854	0.984	0.979333	0.965	0.958333	0.949667	0.964	0.965333	0.937667	0.931333	0.951	0.935667	0.928	0.948333	0.943667	0.926333	0.929	0.936333	0.936333
1855	0.984	0.979333	0.965	0.958333	0.949333	0.964	0.965333	0.937667	0.931333	0.951	0.935667	0.928	0.948333	0.943667	0.926333	0.929	0.936333	0.936333
1856	0.984	0.979333	0.965	0.958333	0.949333	0.964	0.965333	0.937667	0.931333	0.951	0.935667	0.928	0.948333	0.943667	0.926333	0.929	0.936333	0.936333
1857	0.984	0.979333	0.965	0.958333	0.949333	0.964	0.965333	0.937667	0.931333	0.951	0.935667	0.928	0.948333	0.943667	0.926333	0.929	0.936333	0.936333
1858	0.984	0.979333	0.965	0.958333	0.949333	0.964	0.965333	0.937667	0.931333	0.951	0.935667	0.928	0.948333	0.943667	0.926333	0.929	0.936333	0.936333
1859	0.984	0.979333	0.965	0.958333	0.949333	0.964	0.965333	0.937667	0.931333	0.951	0.935667	0.928	0.948333	0.943667	0.926333	0.929	0.936333	0.936
1860	0.984	0.979333	0.965	0.958333	0.949333	0.964	0.965333	0.937667	0.931333	0.951	0.935667	0.928	0.948333	0.943667	0.926333	0.929	0.936333	0.936
1861	0.984	0.979333	0.965	0.958333	0.949333	0.964	0.965333	0.937667	0.931333	0.951	0.935667	0.928	0.948333	0.943667	0.926333	0.929	0.936333	0.936
1862	0.984	0.979333	0.965	0.958333	0.949333	0.964	0.965333	0.937667	0.931333	0.951	0.935667	0.928	0.948333	0.943667	0.926	0.929	0.936333	0.936
1863	0.984	0.979333	0.964667	0.958333	0.949333	0.964	0.965	0.937667	0.931333	0.951	0.935667	0.928	0.948333	0.943667	0.926	0.929	0.936333	0.936
1864	0.984	0.979333	0.964667	0.958333	0.949333	0.964	0.965	0.937667	0.931333	0.951	0.935667	0.928	0.948333	0.943667	0.926	0.928667	0.936333	0.936
1865	0.984	0.979333	0.964667	0.958333	0.949333	0.964	0.965	0.937667	0.931333	0.950667	0.935667	0.928	0.948333	0.943667	0.926	0.928667	0.936	0.936
1866	0.984	0.979333	0.964667	0.958333	0.949333	0.964	0.965	0.937667	0.931333	0.950667	0.935667	0.928	0.948	0.943333	0.926	0.928667	0.936	0.936
1867	0.984	0.979333	0.964667	0.958333	0.949333	0.964	0.965	0.937667	0.931333	0.950667	0.935667	0.928	0.948	0.943333	0.926	0.928667	0.936	0.936
1868	0.984	0.979333	0.964667	0.958333	0.949333	0.964	0.965	0.937667	0.931333	0.950667	0.935667	0.928	0.948	0.943333	0.926	0.928667	0.936	0.936
1869	0.984	0.979333	0.964667	0.958333	0.949333	0.964	0.965	0.937667	0.931333	0.950667	0.935667	0.928	0.948	0.943333	0.926	0.928667	0.936	0.936
1870	0.984	0.979333	0.964667	0.958333	0.949333	0.964	0.965	0.937667	0.931333	0.950667	0.935333	0.928	0.948	0.943333	0.926	0.928667	0.936	0.936
1871	0.984	0.979333	0.964667	0.958333	0.949333	0.963667	0.965	0.937667	0.931333	0.950667	0.935333	0.928	0.948	0.943333	0.926	0.928667	0.936	0.936
1872	0.984	0.979333	0.964667	0.958333	0.949333	0.963667	0.965	0.937667	0.931333	0.950667	0.935333	0.928	0.948	0.943333	0.926	0.928667	0.936	0.935667
1873	0.984	0.979333	0.964667	0.958333	0.949333	0.963667	0.965	0.937333	0.931333	0.950667	0.935333	0.927667	0.948	0.943333	0.926	0.928667	0.936	0.935667
[truncated: 1,700 more rows]
